# Supplementary material for: Metabolic and functional pathways of gut microbiota in patients with gastric cancer: The DELIVER trial (JACCRO GC-08)
Source: Research Square preprint supplement (doi:10.21203/rs.3.rs-7899663/v1), 2025-11-28
Supplement: Supplementary file 1 [file 15e5b204dd6a93b37af4a5fa.xlsx]

## Sheet: Pathways
Pathways	GC08-001	GC08-002	GC08-003	GC08-004	GC08-005	GC08-006	GC08-007	GC08-008	GC08-009	GC08-010	GC08-011	GC08-013	GC08-014	GC08-015	GC08-016	GC08-017	GC08-018	GC08-019	GC08-020	GC08-021	GC08-022	GC08-023	GC08-024	GC08-025	GC08-026	GC08-027	GC08-029	GC08-030	GC08-031	GC08-032	GC08-033	GC08-034	GC08-035	GC08-036	GC08-037	GC08-038	GC08-039	GC08-040	GC08-041	GC08-042	GC08-043	GC08-044	GC08-045	GC08-046	GC08-047	GC08-048	GC08-049	GC08-050	GC08-051
2-Oxocarboxylic acid metabolism	0.371121	0.336079	0.379074	0.39211	0.32375	0.363844	0.368374	0.307114	0.339624	0.312149	0.361509	0.354483	0.325826	0.37788	0.306265	0.387594	0.364911	0.340207	0.326655	0.356317	0.371145	0.312786	0.306395	0.38734	0.283375	0.351622	0.363623	0.321397	0.3825	0.357458	0.363699	0.379946	0.325757	0.338204	0.227471	0.350852	0.334563	0.344053	0.330929	0.336174	0.376871	0.360144	0.307784	0.373363	0.410203	0.358133	0.326146	0.307098	0.351805
ABC transporters	6.12913	8.65013	4.30703	6.55786	5.98486	7.64004	6.75264	6.03438	6.66102	7.66671	5.43276	6.88722	7.09071	7.12698	7.12233	5.92476	6.09043	6.20004	6.04192	7.14152	7.3978	6.70484	6.62147	5.80823	7.61893	5.36763	8.5131	7.83553	7.39943	6.3538	8.22056	5.6251	6.60729	7.41976	9.07881	8.44176	8.45056	7.58318	7.03296	6.14589	4.49669	6.77093	6.42981	8.40621	5.97406	8.79108	8.78084	8.85024	6.32444
Acarbose and validamycin biosynthesis	0.0933814	0.0495675	0.0990285	0.0646946	0.058887	0.0520448	0.0571497	0.0597479	0.0578496	0.0471265	0.0605213	0.0578178	0.0729235	0.0599045	0.0606673	0.0733581	0.0605131	0.0494893	0.0571466	0.0560596	0.0788532	0.0515325	0.0471748	0.0745164	0.0729149	0.086941	0.0554654	0.0484953	0.063559	0.0491333	0.0593873	0.068521	0.0676272	0.0496508	0.0295689	0.0517168	0.0375858	0.0513321	0.0962512	0.0579305	0.104089	0.0644451	0.0632501	0.0652256	0.0722845	0.0557549	0.0517732	0.0449963	0.0656881
Adipocytokine signaling pathway	0.0329678	0.0102834	0.045521	0.0224756	0.0352452	0.0205575	0.0213889	0.0333455	0.0244744	0.0182055	0.0333427	0.0240848	0.0212181	0.0297276	0.0209059	0.0267653	0.0261442	0.0254254	0.0274514	0.0226063	0.0255454	0.0184797	0.0202242	0.031909	0.020421	0.0245887	0.0178471	0.01935	0.0222278	0.0263071	0.0267661	0.0319157	0.0272545	0.0296372	0.0393446	0.00944286	0.0192167	0.0196393	0.0259027	0.0292163	0.0380067	0.0242974	0.0287935	0.0155127	0.0296349	0.00850985	0.0141862	0.012416	0.0317257
African trypanosomiasis	0.00225596	0.0323761	0.00449786	0.0016407	0.00784631	0.0150928	0.00293413	0.000907424	0.0119637	0.0137446	0.00288324	0.00351408	0.00276311	0.0125496	0.0109201	0.00245272	0.0012207	0.00876642	0.00938061	0.00427677	0.0109054	0.0196078	0.0179044	0.00563559	0.00432492	0.00170847	0	0.0143617	0.00916766	0.000719805	0.017532	0.00776461	0.0117951	0.0129035	0.141584	0.0247537	0.0102151	0.00805816	0.0132734	0.00424791	0.00368375	0.00379992	0.0194672	0.00592344	0.00998583	0.00937136	0.011181	0.0135399	0.00313827
Alanine, aspartate and glutamate metabolism	0.865211	0.765645	0.90985	0.829098	0.823585	0.874161	0.815539	0.905197	0.77487	0.672024	0.861758	0.801865	0.759948	0.839163	0.736761	0.861126	0.855252	0.772132	0.784225	0.762762	0.749554	0.717464	0.852113	0.856256	0.837627	0.841511	0.73823	0.702534	0.758681	0.850613	0.781047	0.827507	0.806263	0.710619	0.728603	0.776002	0.713959	0.803398	0.79878	0.92669	0.866597	0.8316	0.826268	0.746816	0.779581	0.755975	0.683367	0.653787	0.780448
alpha-Linolenic acid metabolism	0.000860104	0.00702329	0.000826973	0.00142006	0.000657714	0.00156085	0.00232183	0.00182921	0.00526001	0.010487	0.0010348	0.000530251	0.00118683	0.00140402	0.00598539	0.00120717	0.00112286	0.00605852	0.00384568	0.00512623	0.000873497	0.00876411	0.00761028	0.000334815	0.000535314	0.0010321	0.00055407	0.00848438	0.00327921	0.000484447	0.00269085	0.0051224	0.00424339	0.0038605	0.000712519	0.0038522	0.00710633	0.000125283	0.000724517	0.00150348	0.000337822	0.000505487	0.0033033	0.0032023	0.000447167	0.00515087	0.00650842	0.0107994	0.00254899
Alzheimer disease	0.0124213	0.0163446	0.0145019	0.0134349	0.0168483	0.0176901	0.0132611	0.0152336	0.0158247	0.0132434	0.0143047	0.0107481	0.0134229	0.0171482	0.0144515	0.0141762	0.0145466	0.0140193	0.0151244	0.0121593	0.0152616	0.0166756	0.0150656	0.0170733	0.0173161	0.0110557	0.0146623	0.0153829	0.0143498	0.0155369	0.01411	0.0143964	0.0136566	0.0156651	0.0294082	0.014165	0.0106905	0.0165855	0.0163911	0.0155738	0.0126356	0.0157788	0.0145796	0.0156981	0.0116688	0.0180382	0.0160953	0.0127204	0.015777
Amino sugar and nucleotide sugar metabolism	1.63277	1.10339	1.62553	1.59184	1.87789	1.47641	1.47773	1.72768	1.40994	1.35581	1.7105	1.75492	1.73098	1.6909	1.45694	1.62783	1.57392	1.47912	1.5396	1.53722	1.5529	1.4586	1.32029	1.56513	1.785	1.53176	1.50467	1.44264	1.36472	1.50737	1.32498	1.55508	1.68649	1.61621	1.52995	1.32994	1.51819	1.46993	1.60346	1.5187	1.54011	1.59861	1.47452	1.61011	1.5135	1.37657	1.27575	1.18852	1.48841
Aminoacyl-tRNA biosynthesis	3.48359	3.17554	3.26154	3.19419	3.0211	3.46802	3.18028	3.06909	3.33132	2.55154	3.22791	2.92882	2.74441	3.20998	2.95819	3.34811	2.9702	3.16732	3.09532	2.93573	3.10103	2.92649	3.04394	3.497	3.34533	3.38767	3.29874	2.70208	3.1338	3.43787	3.20207	3.25942	2.80115	2.87374	4.08114	3.3326	2.54505	3.5113	3.51061	3.53338	3.69167	3.56861	3.34224	3.14258	3.2219	3.30776	2.79572	2.47896	3.40412
Aminobenzoate degradation	0.034787	0.0910443	0.0201791	0.0530004	0.0604129	0.0597448	0.0550983	0.0560167	0.0377877	0.044027	0.0370778	0.0497716	0.0353761	0.0359271	0.0667794	0.0358851	0.0209677	0.0383287	0.0424476	0.066357	0.0435389	0.0456632	0.0950935	0.0298959	0.0829734	0.055122	0.0500084	0.0589865	0.0441501	0.0358022	0.0529408	0.0285401	0.0442996	0.052256	0.147884	0.180003	0.046431	0.0591574	0.0524952	0.0427066	0.0124014	0.045873	0.056487	0.0535603	0.0324221	0.0905709	0.0658883	0.100446	0.0223829
Amoebiasis	0.0445002	0.00224067	0.043314	0.0504922	0.0146691	0.033987	0.0160651	0.0269795	0.0519147	0.0143371	0.0490171	0.0393471	0.014086	0.0326915	0.0269454	0.0454077	0.0435771	0.019863	0.0315932	0.0290272	0.01773	0.0168683	0.0292177	0.0537276	0.0482272	0.0815031	0.0168945	0.0276456	0.0441371	0.020837	0.0305592	0.0207505	0.0183566	0.0350297	0.000928306	0.0129566	0.0603747	0.0189285	0.0551445	0.027123	0.053339	0.036885	0.0328761	0.0399395	0.0196646	0.0546205	0.0184296	0.0303597	0.0547308
AMPK signaling pathway	0.00938772	0.0102078	0.0123499	0.0136922	0.0135463	0.0107957	0.0114944	0.0146667	0.0136384	0.0132225	0.0130107	0.0103896	0.0115271	0.0129238	0.0124534	0.0111551	0.0192658	0.0143642	0.0126148	0.0121808	0.00968409	0.0132381	0.00998597	0.0103457	0.0130399	0.00975897	0.00929957	0.012932	0.011413	0.0134086	0.00955728	0.0120347	0.0176052	0.0113736	0.0293969	0.00930572	0.014582	0.00950798	0.0123119	0.0130666	0.0107797	0.0106785	0.0110049	0.0101781	0.011661	0.00979344	0.0129937	0.0157464	0.0139871
Amyotrophic lateral sclerosis (ALS)	0.00241176	0.00848557	0.00708008	0.00194281	0.00180422	0.00345282	0.00537631	0.00387552	0.00628234	0.0092809	0.00404854	0.00310638	0.00849851	0.00481134	0.00564417	0.00155927	0.00257091	0.00688731	0.00436034	0.00751582	0.00305651	0.00754774	0.00430229	0.00228812	0.00189474	0.00105285	0.00191777	0.00811197	0.00343251	0.00798771	0.0051677	0.00718267	0.0067005	0.00507217	0.000525838	0.00385844	0.0086585	0.0027298	0.00106452	0.00353698	0.000323741	0.000969876	0.00664367	0.00705139	0.00467194	0.00478878	0.00730596	0.00939416	0.00237301
Antifolate resistance	0.128992	0.107769	0.131576	0.113839	0.125849	0.104559	0.120732	0.11222	0.104057	0.0921645	0.126961	0.12749	0.112205	0.0947242	0.102387	0.0993734	0.116145	0.107858	0.112409	0.11834	0.110419	0.104487	0.0997147	0.12589	0.108362	0.126926	0.112282	0.0933722	0.105072	0.113925	0.111602	0.114724	0.113309	0.104748	0.140268	0.119915	0.107002	0.110691	0.109475	0.123631	0.129539	0.106888	0.111444	0.0909132	0.124058	0.109949	0.0990408	0.0940259	0.11199
Antigen processing and presentation	0.011695	0.00325054	0.011394	0.0101786	0.00681508	0.00964892	0.00913816	0.00881586	0.0109411	0.00930906	0.00872933	0.00714163	0.0130846	0.00981338	0.00951761	0.010239	0.00985995	0.00969565	0.0110865	0.00801086	0.00883926	0.00958289	0.00862733	0.0123209	0.00573252	0.00915638	0.00997931	0.00984633	0.00990596	0.0121402	0.00615764	0.0115237	0.00667361	0.00876745	0.000757123	0.00488321	0.00842286	0.00809978	0.00936786	0.00832656	0.0104995	0.0105426	0.0083545	0.00922649	0.00858299	0.00433871	0.00887591	0.00620312	0.0142212
Apoptosis	0.127916	0.0080863	0.173589	0.0705371	0.0982955	0.0510623	0.0759524	0.117933	0.0658956	0.0507247	0.124314	0.0950288	0.0619261	0.0774818	0.0497086	0.0922415	0.0871422	0.0511377	0.103657	0.0946071	0.044954	0.0619257	0.0723666	0.154567	0.0461995	0.144248	0.0417417	0.0341189	0.0531259	0.0874437	0.0290343	0.157919	0.0778018	0.0769272	0.00279105	0.01554	0.0523688	0.0416498	0.0915305	0.0911577	0.200588	0.0654525	0.0726154	0.0675642	0.0840167	0.0365098	0.0205617	0.0214699	0.105561
Apoptosis - fly	0.0535516	0.102017	0.134837	0.0797902	0.131202	0.0613863	0.128455	0.111699	0.0570543	0.0756387	0.109053	0.103913	0.0486348	0.091123	0.0951072	0.0418716	0.0766897	0.0935699	0.0682598	0.121743	0.11618	0.0937263	0.0664908	0.0346979	0.0630041	0.0495291	0.0442912	0.0668455	0.0424159	0.0948463	0.108694	0.175894	0.117317	0.071461	0.0302056	0.099348	0.115274	0.0615278	0.0232652	0.0748632	0.0342048	0.033675	0.112232	0.116339	0.102267	0.178678	0.0741814	0.107159	0.0265672
Arabinogalactan biosynthesis - Mycobacterium	0.0150657	0.0587545	0.0194805	0.0287196	0.0259019	0.0271103	0.0283212	0.0185551	0.0229865	0.0202762	0.0168775	0.0252676	0.0151384	0.0260787	0.0388494	0.0139505	0.012402	0.0204272	0.0190237	0.0194724	0.0354766	0.0266202	0.0283587	0.0207754	0.0473175	0.0160882	0.0185129	0.0260955	0.0184509	0.0181628	0.0475066	0.011492	0.0355183	0.0194505	0.102969	0.0453202	0.0172394	0.0226123	0.0256155	0.0340064	0.0164856	0.0249181	0.0336135	0.0205953	0.0195125	0.0601702	0.0191589	0.0268719	0.0112037
Arachidonic acid metabolism	0.0227644	0.0276816	0.00228828	0.0131203	0.0266959	0.0156492	0.0136694	0.0121771	0.0150596	0.016583	0.00813733	0.0284125	0.0148753	0.00855132	0.0100634	0.0179353	0.0200183	0.0150571	0.0288292	0.0217102	0.0184228	0.0246076	0.0233681	0.0273994	0.0161367	0.0337429	0.0125642	0.019309	0.0211272	0.0118057	0.0184772	0.0111568	0.0284501	0.0287533	0.0482615	0.0279319	0.0210646	0.0076158	0.0153784	0.00718957	0.0465139	0.0129096	0.0180692	0.00575029	0.0129161	0.0335217	0.0175981	0.0313264	0.0156395
Arginine and proline metabolism	0.411864	0.328235	0.369952	0.305408	0.345178	0.311771	0.365327	0.41167	0.398591	0.369437	0.333234	0.460926	0.451445	0.340989	0.408987	0.402069	0.375367	0.364906	0.420747	0.43153	0.38179	0.391484	0.436547	0.397109	0.337177	0.478627	0.300619	0.431569	0.372124	0.327056	0.34888	0.409713	0.445478	0.378972	0.240923	0.304056	0.496125	0.367633	0.408953	0.320345	0.413445	0.402604	0.407253	0.398342	0.360457	0.233661	0.487421	0.678215	0.346267
Arginine biosynthesis	0.264983	0.239501	0.285316	0.280798	0.229365	0.265289	0.257594	0.24323	0.2679	0.244789	0.270625	0.2626	0.226296	0.269857	0.247264	0.280733	0.268434	0.260873	0.243838	0.253404	0.274787	0.243813	0.239039	0.262974	0.212462	0.249793	0.250393	0.239911	0.267816	0.272111	0.248641	0.281099	0.245212	0.252951	0.136755	0.239683	0.231185	0.265235	0.231386	0.257759	0.274604	0.270865	0.231812	0.280068	0.265396	0.275281	0.249242	0.236556	0.254718
Ascorbate and aldarate metabolism	0.146745	0.168003	0.101879	0.127488	0.286744	0.0881829	0.22298	0.136937	0.163275	0.251569	0.154473	0.211659	0.199122	0.156924	0.270922	0.135878	0.227291	0.190111	0.186867	0.19242	0.218814	0.239336	0.25292	0.0994671	0.247429	0.128911	0.112605	0.255831	0.128774	0.0878552	0.161803	0.0980585	0.277524	0.215968	0.0501345	0.220363	0.265675	0.162641	0.0965639	0.0982418	0.129194	0.0866983	0.141038	0.141561	0.166454	0.144346	0.235005	0.229814	0.109719
Atrazine degradation	0.00703681	0.0045886	0.00151482	0.0170575	0.00573635	0.00783804	0.00678139	0.00457857	0.00666314	0.0039	0.00940894	0.00909557	0	0.00512364	0.00498788	0.00512949	0.00607855	0.00575839	0.011454	0.0121174	0.00841532	0.00431587	0.0033186	0.00436104	0.00309382	0.00370644	0.00502601	0.01181	0.00631976	0.00775371	0.0023003	0.00522349	0.00742642	0.0117459	0.00160963	0.00700274	0.00463772	0.00395673	0.00090789	0.0125956	0.00164049	0.00664532	0.00424266	0.00789755	0.00518117	0.0221733	0.0133801	0.0238569	0.00584987
Autophagy - yeast	0.0321707	0.0401624	0.0352216	0.0257422	0.051143	0.0363426	0.0345943	0.0279001	0.0256572	0.0081704	0.0254539	0.0120069	0.0567162	0.0622519	0.0725494	0.0677363	0.0395822	0.0158069	0.0466285	0.0132307	0.0554001	0.0194461	0.0257412	0.0399748	0.0313087	0.0263814	0.0484556	0.0344866	0.0455255	0.0360726	0.0736608	0.0326948	0.0446627	0.0483585	0.0565035	0.0310913	0.0263568	0.0941695	0.0653394	0.0394881	0.016435	0.0607599	0.0701004	0.0557159	0.0430346	0.0207827	0.0489996	0.011993	0.0387315
Bacterial chemotaxis	0.227249	0.19838	0.0836139	0.166141	0.108958	0.228022	0.274499	0.151658	0.402268	0.458048	0.134148	0.323451	0.368433	0.191376	0.27606	0.249889	0.385228	0.301607	0.219318	0.291224	0.227574	0.327302	0.261256	0.297406	0.225258	0.215305	0.4501	0.419664	0.325841	0.345635	0.173064	0.205368	0.23094	0.439266	0.0968928	0.147541	0.369067	0.336479	0.12902	0.147997	0.174849	0.260898	0.13906	0.456163	0.142252	0.212852	0.323591	0.252659	0.311402
Bacterial invasion of epithelial cells	0.00512044	0.0285268	0.00341338	0.0268251	0.00815472	0	0.0204037	0.00701361	0.0318836	0.141703	0.0131672	0.0212647	0.0175701	0.00865858	0.0492365	0.00236033	0.0105705	0.0444223	0.0324104	0.0303117	0.00210903	0.0672156	0.0640435	0.000503942	0.000360251	0.0108192	0.0215043	0.0592972	0.022268	0.0165777	0.0152861	0.00787779	0.0484663	0.00104117	0.00366928	0.00679378	0.00538017	0.00298723	0.0078022	0.00794957	0.00234628	0.00571484	0.0127865	0.012044	0.0154607	0.0994728	0.00050713	0.00267238	0.00804378
Bacterial secretion system	0.777669	0.801405	0.770974	0.764369	0.52247	0.803583	0.872115	0.750407	0.966203	0.967008	0.694011	0.632532	1.02824	0.745798	1.04105	0.819345	0.893186	0.984569	0.99224	1.08057	0.717413	0.801832	1.01451	0.755456	0.703601	0.741335	1.15881	1.18917	0.979564	0.828649	0.902605	0.84865	0.713479	0.934343	0.632684	0.737581	0.913289	0.869862	1.00355	0.86993	0.591775	0.796152	0.704164	1.03231	0.703218	0.877833	1.01775	1.09547	0.973561
Base excision repair	0.757168	0.954981	0.940259	0.799064	0.922753	0.903495	0.838688	0.891941	0.873683	0.789478	0.843283	0.832142	0.792126	0.876162	0.932246	0.846272	0.827662	0.86607	0.783356	0.899695	0.847609	0.877574	0.849868	0.862105	1.08666	0.852921	0.839293	0.795233	0.793215	0.870255	0.866069	0.950924	0.833427	0.801611	1.06494	0.839746	0.85984	1.00986	0.836147	0.906011	0.715604	0.813085	0.99033	0.942648	0.941866	0.86652	0.84862	0.883216	0.719048
Benzoate degradation	0.0259385	0.0810712	0.0265899	0.0302162	0.0363202	0.026042	0.0457631	0.0382452	0.0382286	0.0419831	0.0214259	0.0451312	0.0396966	0.0522125	0.0401882	0.0307688	0.0288331	0.0336342	0.0729904	0.0699001	0.0553375	0.0549992	0.0553845	0.0398877	0.0730665	0.0598584	0.0345394	0.0660882	0.0604495	0.0364064	0.0810226	0.0464883	0.0340418	0.034558	0.0316121	0.128663	0.127701	0.0412583	0.0366521	0.0462496	0.030569	0.0463874	0.0698668	0.0467479	0.041039	0.0542704	0.133384	0.206474	0.0367852
beta-Alanine metabolism	0.0579591	0.0590714	0.0621643	0.0537509	0.0456615	0.0579872	0.0656986	0.0552035	0.0819754	0.0857317	0.0570582	0.0572462	0.0613377	0.0457536	0.067371	0.0602393	0.0690662	0.0793096	0.0630534	0.0744097	0.0550328	0.0816706	0.0748512	0.0615937	0.035779	0.0614197	0.0577849	0.10054	0.0672924	0.06373	0.0475898	0.0587015	0.0653118	0.0609526	0.0334003	0.0484339	0.0751649	0.0432891	0.035893	0.0500814	0.0618017	0.0494375	0.0572114	0.0536234	0.0542561	0.0415918	0.073178	0.0790114	0.0598413
beta-Lactam resistance	0.680664	0.665756	0.747544	0.733053	0.72921	0.736082	0.764129	0.856212	0.600072	0.639277	0.801381	0.707835	0.715369	0.708283	0.566632	0.682074	0.716877	0.736931	0.715409	0.698019	0.651812	0.685008	0.616171	0.673806	0.708594	0.569059	0.653655	0.615073	0.679254	0.739081	0.677087	0.848964	0.706013	0.73311	0.692073	0.635602	0.689063	0.66148	0.632598	0.700507	0.701927	0.60797	0.647703	0.725232	0.76439	0.680342	0.659718	0.577991	0.598258
Biofilm formation - Escherichia coli	0.296979	0.650096	0.343195	0.281483	0.311568	0.245052	0.376276	0.317129	0.555899	0.920968	0.271116	0.258565	0.404616	0.298423	0.690257	0.265198	0.357147	0.77024	0.526204	0.484229	0.326605	0.786819	0.674333	0.23963	0.267981	0.329969	0.265306	0.829457	0.486571	0.249015	0.379937	0.332902	0.599105	0.626472	0.124526	0.390244	0.588595	0.227978	0.20312	0.309562	0.222658	0.281025	0.411252	0.330089	0.250139	0.549482	0.627534	0.948328	0.384684
Biofilm formation - Pseudomonas aeruginosa	0.0881177	0.231248	0.0560796	0.111286	0.0767892	0.0703641	0.125809	0.0917235	0.15516	0.31857	0.0770213	0.0993773	0.129138	0.0964198	0.257291	0.127733	0.145332	0.236769	0.171537	0.180077	0.201883	0.208311	0.229326	0.0929572	0.101443	0.0811377	0.134559	0.171072	0.206207	0.0848774	0.155915	0.100211	0.224121	0.262928	0.0481715	0.270382	0.201324	0.0806115	0.0917465	0.076299	0.0547204	0.0887565	0.154267	0.143613	0.149786	0.2761	0.254732	0.33255	0.11574
Biofilm formation - Vibrio cholerae	0.309179	0.346715	0.328351	0.242494	0.323769	0.237463	0.27344	0.342322	0.35968	0.516509	0.307753	0.374157	0.378696	0.279324	0.410262	0.283134	0.395708	0.430255	0.416589	0.330078	0.27516	0.468658	0.358546	0.274436	0.278598	0.302015	0.26236	0.406123	0.302547	0.258129	0.245454	0.290263	0.460018	0.368235	0.0764494	0.251931	0.437581	0.20945	0.242787	0.279741	0.400097	0.252433	0.350362	0.314794	0.257513	0.319652	0.338822	0.453387	0.285228
Biosynthesis of amino acids	2.07566	1.97285	2.15488	2.1451	1.99407	2.09582	2.07947	1.95669	1.93253	1.73834	2.1335	2.05771	1.96662	2.12181	1.83465	2.2378	2.09402	1.84641	1.89938	1.98669	2.072	1.76965	1.81487	2.20268	1.89615	2.10299	2.06583	1.82284	2.0465	2.06917	2.05317	2.10815	1.93065	1.94747	1.76383	2.0163	1.94136	2.0797	2.05664	2.0485	2.09311	2.08025	1.91823	2.04023	2.18984	1.97445	1.82441	1.67619	1.98489
Biosynthesis of ansamycins	0.0299663	0.027754	0.0273091	0.0304566	0.0339559	0.0304578	0.0247857	0.0245842	0.0376691	0.0279552	0.0381753	0.0394082	0.0403876	0.0316982	0.031882	0.029483	0.0397556	0.0342982	0.035363	0.02918	0.0336663	0.0325134	0.0223768	0.0297618	0.0231682	0.0283854	0.0333415	0.0304856	0.0328911	0.0344067	0.0292523	0.0323976	0.0335679	0.0318861	0.0242127	0.0386013	0.0356446	0.0356482	0.0298881	0.0267283	0.0257678	0.0315733	0.0261354	0.0364399	0.0267248	0.0284635	0.0402977	0.0331649	0.0354638
Biosynthesis of antibiotics	3.31233	2.95516	3.2667	3.27819	3.15689	3.17616	3.14749	3.16103	3.08908	2.79406	3.17778	3.18429	3.01312	3.22388	2.98264	3.32962	3.26612	3.04394	3.13389	3.07088	3.21542	2.95212	2.89032	3.38298	3.07993	3.22702	3.0276	2.79302	3.16499	3.18682	3.04174	3.24463	3.08536	3.08242	2.99494	3.03278	2.92897	3.15328	3.24954	3.17156	3.39466	3.2325	3.05705	3.08864	3.34615	2.90043	2.87197	2.66212	3.18721
Biosynthesis of secondary metabolites	4.65355	4.36166	4.83522	4.65166	4.43265	4.42102	4.53288	4.46269	4.53049	4.26042	4.63504	4.40963	4.28779	4.61066	4.33291	4.74422	4.63478	4.52687	4.52954	4.48142	4.47529	4.50863	4.47198	4.87416	4.37417	4.86231	4.39715	4.37383	4.59194	4.5448	4.48431	4.81979	4.4357	4.49968	4.4753	4.26304	4.28737	4.43327	4.57447	4.55456	5.05501	4.66808	4.45177	4.4645	4.77949	4.31805	4.15787	4.00882	4.67365
Biosynthesis of secondary metabolites - unclassified	0.0914616	0.0494899	0.0750322	0.096213	0.0735631	0.0947864	0.0960148	0.0953961	0.0822999	0.0753613	0.0897719	0.0746303	0.0936753	0.0858058	0.0690701	0.0945631	0.113433	0.0805725	0.0974725	0.0687934	0.0728657	0.0458761	0.0735659	0.0894976	0.107554	0.0958956	0.115536	0.0530861	0.114096	0.112369	0.0696269	0.0885902	0.0476832	0.107365	0.083661	0.0707392	0.0439668	0.112629	0.0951865	0.0823492	0.102211	0.0989869	0.0641159	0.0970394	0.067403	0.053872	0.0629087	0.0436915	0.118146
Biosynthesis of siderophore group nonribosomal peptides	0.0171234	0.0865642	0.0176796	0.0223124	0.0128167	0.00548002	0.0212439	0.0140669	0.0824181	0.138995	0.00573971	0.0152643	0.0919471	0.0193323	0.0856732	0.0122925	0.0314987	0.0924991	0.0781139	0.0350788	0.00990716	0.127277	0.0608754	0.018066	0.020175	0.0223018	0.0134029	0.0722943	0.0336205	0.00364146	0.0297299	0.0282675	0.0856238	0.0345302	0.0155651	0.0892626	0.0362905	0.0193346	0.00749029	0.0143171	0.0219831	0.0205589	0.0282245	0.0485247	0.013034	0.0652016	0.0771288	0.0138201	0.0307183
Biosynthesis of unsaturated fatty acids	0.00667782	0.0676317	0.00771667	0	0.0155631	0.00267876	0.0177481	0.00640456	0.0370766	0.0919267	0.00427733	0.00744049	0.0198538	0.0366909	0.0551768	0.00877489	0.0156386	0.0517924	0.0379846	0.0309254	0.0308528	0.0978156	0.0527856	0.00281523	0.0144794	0.0118665	0	0.0764039	0.0312188	0.00677249	0.0613113	0.0223347	0.0519281	0.0436351	0.0204019	0.0453478	0.0503932	0.00512552	0.0129249	0.0144099	0.00387257	0.00833601	0.0708824	0.0289857	0.0507471	0.0504822	0.0590458	0.0423104	0.0158588
Biosynthesis of vancomycin group antibiotics	0.0469226	0.0254751	0.0497054	0.0291207	0.0303361	0.0264618	0.0283279	0.0292641	0.0241352	0.023336	0.0287913	0.027209	0.0348123	0.0304872	0.0312269	0.0376832	0.0250421	0.0213571	0.0253222	0.0252003	0.0345464	0.0245245	0.0233952	0.0349501	0.0299721	0.0460538	0.0265744	0.0220457	0.0308869	0.0280722	0.0310611	0.0252571	0.0383396	0.0234387	0.0134994	0.02374	0.0169488	0.0277191	0.0352913	0.0315697	0.0533471	0.0290234	0.0336573	0.0343369	0.0337207	0.0255675	0.0246686	0.0218901	0.0272552
Biotin metabolism	0.32354	0.294564	0.371765	0.329339	0.367466	0.312754	0.36533	0.367079	0.307928	0.374879	0.359305	0.366045	0.304408	0.332349	0.346034	0.338644	0.388121	0.347415	0.354192	0.360451	0.35805	0.364555	0.381755	0.306015	0.29406	0.30904	0.310502	0.370612	0.308576	0.327567	0.298587	0.335182	0.417036	0.358746	0.154581	0.333962	0.3823	0.327974	0.265174	0.323573	0.293922	0.284937	0.301122	0.24853	0.418205	0.279543	0.339408	0.386176	0.305817
Butanoate metabolism	0.270178	0.353371	0.269119	0.267678	0.253034	0.307026	0.284986	0.313427	0.291353	0.25287	0.259386	0.324747	0.320941	0.275549	0.279303	0.262251	0.260285	0.278764	0.272793	0.308941	0.250878	0.286136	0.309595	0.263394	0.316607	0.272616	0.261215	0.280488	0.248617	0.255542	0.281769	0.304029	0.29413	0.284572	0.193294	0.350871	0.307845	0.30241	0.237688	0.30408	0.237752	0.256645	0.321529	0.315435	0.300413	0.297214	0.345072	0.343185	0.261044
C5-Branched dibasic acid metabolism	0.102982	0.1284	0.10431	0.122333	0.103061	0.116398	0.113757	0.104394	0.0978443	0.101838	0.10292	0.118684	0.0853627	0.120875	0.0877102	0.105249	0.102752	0.0998783	0.097471	0.118427	0.114005	0.0939834	0.108997	0.108542	0.121128	0.103712	0.108541	0.101357	0.110872	0.104164	0.115137	0.119609	0.111299	0.103128	0.148118	0.137419	0.100941	0.100464	0.0954737	0.104022	0.0949636	0.102656	0.106939	0.107157	0.131316	0.115904	0.107818	0.0970907	0.086583
Caprolactam degradation	0.00213161	0.00419794	0.00236193	0.00132752	0.000903604	0.00488977	0.00290069	0.00345928	0.00469706	0.00792888	0.0027471	0.00195051	0.00540024	0.00289102	0.00399331	0.0029871	0.00292075	0.00623078	0.00376019	0.00292118	0.00231249	0.00445301	0.00334741	0.00196518	0.000605657	0.00178245	0.00194865	0.00647277	0.0033593	0.00517869	0.00245892	0.0049954	0.00192737	0.00225046	0.00376432	0.00259686	0.00463688	0.00408068	0.00236027	0.00193282	0.00212231	0.00275992	0.00314541	0.0127127	0.000642911	0.00276337	0.00869712	0.00733841	0.00843467
Carbapenem biosynthesis	0.0390121	0.0426263	0.0492261	0.0427223	0.0446359	0.0402662	0.0505959	0.0412306	0.0419118	0.0346956	0.0470284	0.0406065	0.0491436	0.0467731	0.036432	0.0508332	0.0425192	0.0368199	0.0328179	0.0392718	0.0430627	0.0321242	0.0381182	0.0489631	0.0442773	0.04008	0.0382431	0.037257	0.0448309	0.0453404	0.0414416	0.0443165	0.0430048	0.032738	0.0453651	0.043178	0.0372832	0.0452475	0.0496627	0.0467053	0.0347921	0.050416	0.0399503	0.0401472	0.0491706	0.0411518	0.0333099	0.0346938	0.0360932
Carbohydrate digestion and absorption	0.0177606	0.0609497	0.0673135	0.0222426	0.0595859	0.030649	0.0359962	0.0287899	0.0328653	0.0409372	0.0342477	0.0254034	0.010999	0.0238772	0.0256593	0.0432539	0.0349518	0.043094	0.0311011	0.0349934	0.0233287	0.04322	0.0415347	0.0462616	0.0303386	0.0246038	0.0241689	0.028634	0.042238	0.0478376	0.0217991	0.0557646	0.0153756	0.0361072	0.0610119	0.0591258	0.0224356	0.0356396	0.0244367	0.0281425	0.0529207	0.0292991	0.0992767	0.043892	0.0351101	0.0434738	0.0237651	0.0334524	0.0430663
Carbon fixation in photosynthetic organisms	0.227628	0.18648	0.239459	0.21213	0.216219	0.211952	0.194194	0.205417	0.218471	0.206248	0.216637	0.20636	0.222388	0.230454	0.217899	0.222437	0.219159	0.219678	0.219117	0.207288	0.222933	0.212285	0.200341	0.220643	0.212174	0.214113	0.207538	0.195148	0.194575	0.2201	0.199444	0.233759	0.20359	0.217272	0.166527	0.192818	0.205682	0.210459	0.215833	0.210998	0.215309	0.22276	0.208115	0.226695	0.206662	0.199436	0.217368	0.19373	0.222562
Carbon fixation pathways in prokaryotes	0.387166	0.276166	0.396674	0.349677	0.340625	0.354904	0.342024	0.370883	0.346374	0.301919	0.370761	0.341956	0.318505	0.342626	0.313433	0.357713	0.338407	0.348161	0.35263	0.347081	0.326527	0.331464	0.308181	0.364868	0.29197	0.346395	0.293478	0.302671	0.32156	0.340867	0.305794	0.375836	0.333072	0.327162	0.21935	0.256174	0.326824	0.310385	0.342332	0.341135	0.342907	0.329337	0.334514	0.316228	0.38551	0.272773	0.303157	0.291447	0.356885
Carbon metabolism	1.06852	0.948668	1.08423	1.05411	1.05555	1.06439	1.04998	1.05988	1.14375	1.07192	1.05893	1.11312	1.07224	1.08533	1.07072	1.05778	1.04883	1.11433	1.06435	1.07903	1.02363	1.106	0.988524	1.08025	1.00387	1.03543	0.979157	1.04728	1.01545	1.05333	1.02652	1.12992	1.06783	1.03428	0.871399	0.962811	1.10997	1.02939	1.04849	1.07099	0.975989	1.05141	1.04371	1.10597	1.06904	0.951837	1.04091	1.04953	1.09499
Cationic antimicrobial peptide (CAMP) resistance	0.526418	0.636221	0.619657	0.588267	0.531978	0.569855	0.650331	0.621666	0.642434	0.882695	0.656321	0.594271	0.562532	0.522285	0.689394	0.54224	0.593876	0.7707	0.631145	0.695043	0.586369	0.710049	0.624207	0.447338	0.48919	0.452342	0.513317	0.757705	0.596183	0.621489	0.518629	0.60743	0.662324	0.624235	0.277076	0.530258	0.786788	0.547264	0.436828	0.518029	0.488532	0.442712	0.576087	0.628112	0.568713	0.698762	0.790405	0.856968	0.523975
Cell cycle - Caulobacter	1.25147	0.96916	1.30164	1.22146	1.03668	1.26409	1.22803	1.19614	1.18958	0.943198	1.20325	1.02404	1.14463	1.13341	1.05265	1.29591	1.1801	1.06769	1.18121	1.03646	1.12446	1.07794	1.11162	1.31277	1.15197	1.41443	1.17259	0.926926	1.24574	1.28683	1.08854	1.21578	0.983991	1.14227	1.02062	1.05307	0.929634	1.20378	1.30603	1.22389	1.25138	1.33054	1.13661	1.16156	1.20146	1.04307	0.965362	0.779386	1.29428
Central carbon metabolism in cancer	0.0410267	0.0472378	0.0451651	0.0417745	0.0661571	0.0424032	0.0416518	0.0609151	0.0387851	0.0424297	0.0503992	0.0598166	0.0400468	0.0545362	0.048177	0.0414685	0.0570602	0.0492672	0.0439482	0.0454441	0.0425318	0.0450106	0.0466749	0.0318606	0.0721984	0.0419539	0.0358987	0.0434723	0.0327744	0.0455578	0.0484487	0.0456728	0.0646602	0.0420905	0.0605513	0.0560064	0.04567	0.0495602	0.0411507	0.0559967	0.037756	0.0419044	0.0587001	0.0336883	0.0457878	0.0492804	0.03848	0.0385618	0.0342008
Chagas disease (American trypanosomiasis)	0.00225596	0.0152441	0.00449786	0.00117881	0.00735022	0.00109734	0.00293413	0.000907424	0.0119637	0.0137446	0.00216585	0.00204302	0.00276311	0.0110352	0.0109201	0.00162742	0.0012207	0.00876642	0.00938061	0.00427677	0.0109054	0.0196078	0.00778728	0.00563559	0.00432492	0.00170847	0	0.0143617	0.00916766	0.000719805	0.017532	0.00707426	0.0117951	0.0105494	0.134188	0.00866249	0.00654698	0.00771639	0.0132734	0.00424791	0.00368375	0.00379992	0.0194672	0.00592344	0.0096269	0.00937136	0.0094248	0.0135399	0.00313827
Chloroalkane and chloroalkene degradation	0.0276158	0.0294243	0.0180792	0.021306	0.0172953	0.0352239	0.0224581	0.0198573	0.0277397	0.0226741	0.0155647	0.0310331	0.0266898	0.0315914	0.030568	0.0277632	0.0210855	0.0212223	0.0219156	0.0303699	0.0273754	0.0276496	0.0195957	0.0296271	0.0422789	0.0266825	0.0318622	0.0274268	0.0315491	0.0239383	0.0333259	0.0290067	0.0190896	0.0256953	0.041809	0.0207131	0.028617	0.0311792	0.0272778	0.0234721	0.0141739	0.0364288	0.0242228	0.0275809	0.0206232	0.0278264	0.0273747	0.0441601	0.0226844
Chlorocyclohexane and chlorobenzene degradation	0.00811427	0.0138871	0.00476461	0.0112183	0.00966085	0.0129101	0.0128471	0.00609742	0.0185926	0.0193388	0.0056429	0.0104551	0.0104641	0.0133687	0.0167698	0.00847228	0.00862886	0.0146718	0.0116615	0.0159118	0.00835405	0.0185032	0.0128152	0.0132782	0.0205197	0.00827914	0.0131644	0.0229969	0.0153341	0.00820051	0.0171383	0.0112833	0.00975093	0.013001	0.00546403	0.0104904	0.0185735	0.0101358	0.013114	0.0116184	0.00412955	0.0178718	0.0102784	0.0134867	0.00530649	0.0183508	0.0219998	0.0316748	0.0106792
Cholesterol metabolism	0.00441145	0.000519	0.0112951	0.00216661	0.010797	0.00741431	0.00245076	0.00634147	0.00870769	0.00594699	0.00212661	0.00994982	0.00297406	0.00561379	0.00302693	0.00203439	0.0109353	0.0127563	0.00401321	0.00844161	0.00672743	0.00484706	0.00290693	0.00377742	0.00433082	0.00280204	0.00300902	0.00438045	0.00125695	0.0125078	0.00330431	0.0178806	0.00612637	0.00526039	0	0.00100161	0.00806838	0.00675158	0.00155167	0.00391889	0.00134214	0.00260169	0.00278063	0.0120714	0.00294706	0.00250743	0.00483164	0.00205272	0.00349554
Choline metabolism in cancer	0.0028615	0.00611509	0.00724908	0.00469615	0.00672167	0.00393413	0.005606	0.00930335	0.00617611	0.0143092	0.00985975	0.0051214	0.00486057	0.00384246	0.00804298	0.00637475	0.00737847	0.00655294	0.00527942	0.00682677	0.0041326	0.00814412	0.00485825	0.00235245	0.00229216	0.00121535	0.00600758	0.00619984	0.00572116	0.0057167	0.00318054	0.00259796	0.00787778	0.00583787	0	0.00388966	0.00844358	0.00441289	0.00353499	0.00608594	0.00176211	0.00244055	0.0069435	0.00284143	0.00686292	0.00598143	0.00895642	0.00815322	0.00506075
Citrate cycle (TCA cycle)	0.214731	0.176971	0.226242	0.187677	0.191938	0.185084	0.184592	0.216829	0.207205	0.198731	0.210597	0.184338	0.196375	0.185692	0.188936	0.199252	0.198412	0.215595	0.207886	0.195726	0.179842	0.233764	0.191537	0.221033	0.170948	0.208468	0.165798	0.181183	0.178375	0.185517	0.170088	0.219869	0.199146	0.201891	0.116526	0.180499	0.199009	0.158705	0.192692	0.193418	0.227263	0.179151	0.200517	0.169242	0.224025	0.153016	0.187486	0.203045	0.210192
Cushing syndrome	0.00206628	0.0033315	0.00099673	0.00118651	0.00104569	0.000711277	0.00192965	0.00328743	0.00277716	0.00285746	0.000502256	0.00183724	0.000928469	0.00179985	0.00408295	0.00209987	0.000445232	0.0022371	0.00218559	0.00326787	0.00212479	0.00541139	0.0032604	0.00108431	0.00564726	0.00352182	0.00157708	0.00200199	0.00204234	0.00138334	0.0032767	0.00139917	0.00289967	0.00210416	0.00440114	0.00242896	0.00376507	0.00382044	0.00307106	0.00273044	0.00180974	0.00271516	0.00555846	0.00234984	0.00191749	0.00201016	0.00340129	0.00427239	0.00188626
Cyanoamino acid metabolism	0.199683	0.133598	0.30492	0.23414	0.280136	0.228154	0.183598	0.226251	0.211214	0.192727	0.297565	0.173789	0.209659	0.216443	0.181423	0.203539	0.219462	0.191709	0.210802	0.188496	0.181235	0.14341	0.172085	0.210596	0.190689	0.194851	0.161925	0.195498	0.185023	0.211501	0.216538	0.187901	0.23549	0.164443	0.114913	0.142155	0.160626	0.194587	0.244043	0.225936	0.235904	0.193966	0.195156	0.185555	0.191777	0.177961	0.144286	0.156884	0.214255
Cysteine and methionine metabolism	0.756971	0.829998	0.773759	0.784707	0.719842	0.764585	0.779094	0.7276	0.766256	0.659307	0.765142	0.770802	0.720541	0.826405	0.775676	0.834341	0.771892	0.718514	0.774502	0.724595	0.799766	0.798703	0.74255	0.867932	0.82967	0.79123	0.776695	0.712828	0.73029	0.741133	0.830426	0.714061	0.70922	0.761689	0.664453	0.766535	0.851609	0.792027	0.877563	0.793894	0.894402	0.793983	0.79274	0.753032	0.774687	0.828124	0.779951	0.809685	0.759711
D-Alanine metabolism	0.0842758	0.1115	0.0854774	0.0983947	0.0921316	0.0958192	0.0914382	0.0940185	0.0978999	0.0847852	0.0835892	0.0909498	0.0938835	0.0951179	0.0911534	0.0907837	0.0894858	0.0999942	0.0911129	0.0788252	0.0884797	0.106784	0.11396	0.0876805	0.112445	0.103436	0.0904166	0.078316	0.0938624	0.0938857	0.0959945	0.0968424	0.0794115	0.0792026	0.174753	0.105881	0.0889074	0.103438	0.0931344	0.100091	0.0900967	0.102485	0.121766	0.087488	0.0995256	0.107355	0.0920355	0.0929571	0.108579
D-Arginine and D-ornithine metabolism	0.00481701	0.00809155	0.00595912	0.00296187	0.00122219	0.00476085	0.00976408	0.00634747	0.0114953	0.00168939	0.00297808	0.00742453	0.0149771	0.0113582	0.0044329	0.0041093	0.00124507	0.00188059	0.0048305	0.00624183	0.00399974	0.00601442	0.0019473	0.00367506	0.0115362	0.00305111	0.00489616	0.00106223	0.00324397	0.01152	0.0119485	0.00244456	0.00630257	0.00534605	0	0.00249524	0.0162463	0.00754971	0.0116731	0.00171674	0.00269971	0.00912066	0.00302723	0.0173428	0.000588895	0.00401485	0.0089038	0.00565535	0.00243405
Degradation of aromatic compounds	0.0284477	0.0983075	0.0321362	0.0342926	0.0423842	0.0403276	0.0595309	0.0518522	0.0360182	0.115995	0.0315716	0.0445711	0.0410343	0.057875	0.0445571	0.0297164	0.0322574	0.0367146	0.0783963	0.0987904	0.0623012	0.0605862	0.0973595	0.0315796	0.0711007	0.0593406	0.0349601	0.117938	0.070071	0.0457796	0.0783489	0.0593737	0.0382395	0.0551483	0.0722744	0.140099	0.129133	0.0476073	0.0314415	0.0523507	0.0211952	0.0425792	0.0781752	0.0650203	0.0282733	0.07684	0.150682	0.253401	0.0504745
D-Glutamine and D-glutamate metabolism	0.173679	0.149966	0.170304	0.182333	0.160041	0.166785	0.173691	0.167733	0.177164	0.135274	0.175352	0.195686	0.156436	0.165619	0.159915	0.181598	0.169557	0.169307	0.170756	0.152044	0.158852	0.142601	0.155841	0.172924	0.168507	0.181447	0.161933	0.139198	0.158986	0.177567	0.159486	0.17349	0.154205	0.17662	0.18667	0.143909	0.154777	0.166506	0.177269	0.173398	0.186387	0.177224	0.170565	0.162952	0.171194	0.136563	0.155497	0.13613	0.180129
Dioxin degradation	0.00823078	0.0131458	0.00408178	0.00938765	0.0151324	0.00677299	0.0170492	0.010434	0.00577816	0.0173994	0.00831155	0.0122583	0.00807512	0.0106272	0.00805807	0.0111292	0.00751759	0.00630189	0.0127348	0.0133618	0.0165596	0.00654197	0.0164465	0.00674799	0.0200895	0.0103837	0.0104564	0.022045	0.0107591	0.00998513	0.0108608	0.00562012	0.0102395	0.00417965	0.0255999	0.0243746	0.00757844	0.0126751	0.0067842	0.0151217	0.00257844	0.0124272	0.00764191	0.00741214	0.00442578	0.0292514	0.0115554	0.0193402	0.0101738
DNA replication	1.13975	1.01394	1.05001	1.08126	1.13596	1.00396	0.991102	1.23586	1.02368	0.824472	1.1312	0.967208	0.925187	1.07975	1.03692	1.01549	1.01447	0.990077	1.05239	0.978975	0.908428	0.977703	0.97779	1.10118	1.12959	1.11179	0.990591	0.833954	1.04459	1.13253	1.01928	1.00821	0.94047	0.967983	1.08572	0.889469	0.823765	1.04358	1.0778	1.11781	1.20671	1.05196	1.1804	0.900416	1.02001	0.917786	0.831202	0.858572	1.1162
Drug metabolism - cytochrome P450	0.00130231	0.0150437	0.0037036	0.00201345	0.00340231	0.00147452	0.00549729	0.00355129	0.00672988	0.0141696	0.00195447	0.00718883	0.00186503	0.00406738	0.0104617	0.0032309	0.00541344	0.0085232	0.0112382	0.00773803	0.00464639	0.0140332	0.00987711	0.0017618	0.003387	0.00667899	0.00306765	0.0160652	0.00877086	0.00411444	0.0115024	0.00566431	0.00876461	0.0120346	0.016538	0.0124104	0.0169263	0.00630517	0.000838497	0.00519081	0.000497784	0.00236929	0.00962635	0.00695581	0.00262267	0.0112328	0.0222011	0.0338122	0.00280045
Drug metabolism - other enzymes	0.367669	0.300684	0.362531	0.363087	0.37825	0.369975	0.359899	0.391183	0.353636	0.318087	0.388274	0.34653	0.294899	0.302958	0.3555	0.352621	0.340329	0.33782	0.36057	0.340907	0.319499	0.318782	0.33642	0.382957	0.405755	0.373801	0.335187	0.325965	0.32606	0.352813	0.357701	0.339484	0.33232	0.364558	0.369471	0.321021	0.343709	0.334698	0.383144	0.391129	0.430284	0.360177	0.343256	0.340736	0.330371	0.354808	0.366752	0.333014	0.391648
Epithelial cell signaling in Helicobacter pylori infection	0.287158	0.218039	0.326062	0.267355	0.252292	0.276376	0.27018	0.233373	0.303938	0.247833	0.28078	0.258492	0.25334	0.233458	0.232298	0.278014	0.291599	0.302217	0.280304	0.269848	0.247754	0.284725	0.202256	0.294966	0.189926	0.262615	0.247675	0.252944	0.246148	0.289466	0.236975	0.311172	0.248848	0.263982	0.123692	0.231494	0.24677	0.243181	0.274727	0.281495	0.28245	0.28089	0.215421	0.253305	0.287235	0.302176	0.283026	0.275141	0.310942
Estrogen signaling pathway	0.011695	0.00325054	0.011394	0.0101786	0.00681508	0.00964892	0.00913816	0.00881586	0.0109411	0.00930906	0.00872933	0.00714163	0.0130846	0.00981338	0.00951761	0.010239	0.00985995	0.00969565	0.0110865	0.00801086	0.00883926	0.00958289	0.00862733	0.0123209	0.00573252	0.00915638	0.00997931	0.00984633	0.00990596	0.0121402	0.00615764	0.0115237	0.00667361	0.00876745	0.000857992	0.00488321	0.00842286	0.00809978	0.00936786	0.00832656	0.0104995	0.0105426	0.0083545	0.00922649	0.00858299	0.00433871	0.00887591	0.00620312	0.0142212
Ether lipid metabolism	0.00230483	0.00378635	0.00117606	0.00236206	0.000905323	0.00332919	0.00187849	0.00198759	0.00746199	0.0073912	0.00404653	0.000424511	0.00439621	0.00291643	0.00598811	0.00234119	0.000727469	0.00682481	0.00486262	0.00256146	0.0035878	0.00850448	0.00505884	0.00351632	0.000855196	0.000623637	0.000573509	0.00734368	0.0028377	0.00251795	0.0054348	0.00947908	0.00264073	0.00318552	0	0.00273445	0.00631106	0.00259287	0.00193848	0.0023731	0.00056771	0.00211366	0.00380422	0.00126292	0.00134812	0.0028703	0.00608291	0.00942275	0.00414264
Fatty acid biosynthesis	0.301756	0.32351	0.370987	0.324693	0.348035	0.313316	0.313328	0.300239	0.247345	0.240861	0.349175	0.333222	0.235283	0.330595	0.25573	0.303438	0.302225	0.329575	0.306416	0.309597	0.290418	0.235669	0.268906	0.281095	0.374491	0.296645	0.301728	0.251383	0.273098	0.326734	0.284513	0.353724	0.317935	0.272861	0.434169	0.322049	0.260929	0.323947	0.267559	0.330721	0.266952	0.289376	0.251616	0.300519	0.290621	0.303559	0.24449	0.229092	0.270626
Fatty acid degradation	0.0510404	0.0602161	0.0621715	0.0364852	0.0495304	0.046769	0.0452942	0.0526578	0.0575333	0.0687545	0.0470388	0.0456824	0.0438559	0.0510024	0.0619134	0.044589	0.0469038	0.064231	0.0572982	0.0605667	0.0457826	0.0713093	0.059372	0.0454376	0.0443248	0.0459886	0.0406874	0.0798882	0.0537785	0.0490855	0.0607829	0.0549472	0.0579114	0.0648946	0.072863	0.0436469	0.0615142	0.0481516	0.0380094	0.0533247	0.045742	0.039054	0.0606546	0.0476259	0.0520175	0.0492378	0.0583671	0.0794847	0.0529534
Fatty acid metabolism	0.284514	0.236557	0.357069	0.287175	0.308453	0.263107	0.27086	0.284395	0.248595	0.251594	0.31684	0.300281	0.239919	0.304903	0.252415	0.292431	0.29806	0.309437	0.30016	0.291273	0.273244	0.243538	0.254868	0.268922	0.314334	0.275683	0.272339	0.263105	0.26041	0.297417	0.25391	0.325629	0.300298	0.277104	0.273429	0.244201	0.271499	0.282526	0.253319	0.284165	0.265621	0.264335	0.243505	0.283354	0.278849	0.222211	0.254269	0.251268	0.266675
Ferroptosis	0.0488505	0.0160603	0.0774894	0.0345041	0.0566843	0.0337303	0.0347845	0.0566728	0.0447866	0.0365716	0.0543715	0.0446125	0.0422507	0.0427599	0.0387314	0.0400792	0.0432361	0.0413416	0.0463558	0.0432743	0.0386643	0.0296743	0.0316164	0.0377481	0.0337936	0.0439012	0.0387377	0.0312844	0.033117	0.039931	0.0346152	0.0606146	0.0471428	0.0414452	0.0401	0.014644	0.0495067	0.0276492	0.0405785	0.0478886	0.0649454	0.0342144	0.0395257	0.0367548	0.0425514	0.0190941	0.0286448	0.0279191	0.0440205
Flagellar assembly	0.175441	0.201294	0.0528649	0.0593958	0.10965	0.102469	0.324964	0.117936	0.627911	1.34108	0.0981977	0.348696	0.283897	0.143055	0.418267	0.272385	0.529265	0.529992	0.206057	0.375738	0.165573	0.579767	0.468449	0.333829	0.160916	0.236928	0.60064	0.680771	0.438945	0.473546	0.0722655	0.246246	0.477233	0.490327	0	0.0518103	0.253987	0.352704	0.0261507	0.182134	0.174578	0.254403	0.164425	0.417077	0.114195	0.434343	0.251385	0.152603	0.361033
Flavone and flavonol biosynthesis	0.00210715	0.00313036	0.00553211	0.00383153	0.00499812	0.00238906	0.00307741	0.0042319	0.00547002	0.0058801	0.0134069	0.00319065	0.00230112	0.00539492	0.00467957	0.00405344	0.00513594	0.00426908	0.00369769	0.00210668	0.00188557	0.00399987	0.00541243	0.00242536	0.0037163	0.00591914	0.00497178	0.00775701	0.00384844	0.00405581	0.00742116	0.00301866	0.00562042	0.00149645	0.00105132	0.00885865	0.00275947	0.0040359	0.0042022	0.00678952	0.00113968	0.00546578	0.00115234	0.00584329	0.00422258	0.0065887	0.00169138	0.00137709	0.00448912
Fluid shear stress and atherosclerosis	0.152921	0.161393	0.119415	0.158631	0.145884	0.150367	0.154342	0.163303	0.12279	0.11175	0.134489	0.138717	0.133824	0.150857	0.168832	0.164893	0.134424	0.134195	0.147453	0.133011	0.173561	0.131193	0.12235	0.186998	0.144376	0.205218	0.157728	0.108343	0.153578	0.150082	0.158333	0.136425	0.154456	0.202194	0.0876051	0.164959	0.165385	0.168869	0.132931	0.152233	0.160652	0.17686	0.152658	0.14462	0.160628	0.185533	0.146902	0.133784	0.157458
Folate biosynthesis	0.727736	0.775874	0.67678	0.680211	0.75236	0.68753	0.740371	0.700941	0.610118	0.722811	0.762933	0.756553	0.50062	0.570381	0.662362	0.581526	0.734686	0.639443	0.730185	0.722205	0.697834	0.717797	0.787567	0.70062	0.549051	0.840258	0.530106	0.647732	0.639392	0.569082	0.681946	0.630004	0.77852	0.684625	0.864542	0.661972	0.601438	0.59223	0.564504	0.747333	0.766829	0.615467	0.651111	0.489162	0.808254	0.717327	0.565881	0.679311	0.648171
FoxO signaling pathway	0.0064999	0.0193022	0.0221936	0.00848832	0.0168531	0.0115917	0.0184379	0.0148773	0.0134795	0.022189	0.0184663	0.0119907	0.0152411	0.00896851	0.0147705	0.00947806	0.0129011	0.0211063	0.0124847	0.0163431	0.0111727	0.0170397	0.0154756	0.00861503	0.00862209	0.00607118	0.00562352	0.0175162	0.00833401	0.0174785	0.00998961	0.0211092	0.0174412	0.0102654	0.0289957	0.0140024	0.0162546	0.011139	0.0041833	0.015611	0.00157451	0.00591519	0.0123074	0.013352	0.0150735	0.0188408	0.0144551	0.0183698	0.00816385
Fructose and mannose metabolism	0.825964	0.70114	0.851593	0.984045	0.890388	0.70061	0.758414	0.769979	0.805583	0.980521	0.818161	0.781018	0.902274	0.697775	0.846187	0.786417	0.801684	0.769646	0.724335	0.857856	0.670028	0.849277	0.939391	0.918543	0.991861	0.919233	0.834606	0.792068	0.969827	0.705998	0.725161	0.667117	0.887953	0.720155	0.819868	0.921227	0.770589	0.724715	0.942625	0.663065	1.01073	0.905096	0.770308	0.828852	0.734507	0.946351	0.670401	0.727336	0.794159
GABAergic synapse	0.042174	0.0231215	0.0542022	0.032572	0.043709	0.0389111	0.0311026	0.0480933	0.0400468	0.0339846	0.0466821	0.0448823	0.0462175	0.0377115	0.0358441	0.0476794	0.0416531	0.0416906	0.038011	0.0391595	0.0371765	0.0391968	0.0413069	0.0351647	0.0333125	0.0273996	0.0298112	0.0386915	0.0307565	0.0419919	0.0342951	0.0444249	0.0420234	0.0347702	0.0229063	0.0206001	0.036557	0.0352818	0.0338362	0.0442382	0.0288344	0.0325609	0.0420033	0.0338451	0.0371393	0.0224821	0.0307107	0.0271798	0.0322818
Galactose metabolism	0.948828	0.839136	1.27977	1.021	1.22343	1.08622	0.908195	0.969862	0.776146	0.984971	1.06054	1.05313	1.26501	1.11226	1.05902	0.860216	1.08047	0.912792	0.924683	0.983559	1.15788	0.839683	0.936401	0.869377	1.0642	0.863019	1.06543	1.00011	0.822244	0.899216	0.967877	0.992009	1.22705	0.882474	0.987549	1.02956	0.801057	0.965045	1.02092	0.888706	0.80453	0.94305	1.03976	0.960175	1.10429	0.721983	0.78306	0.631382	0.875563
Geraniol degradation	0.00082121	0.00588425	0.000918977	0.000667022	0.000141416	0.0012881	0.0016706	0.00249079	0.0054324	0.00889419	0.000281433	0.000976746	0.00479152	0.00169699	0.00453789	0.000420103	0.00102457	0.0052161	0.00294087	0.00637298	0.00244723	0.00790055	0.00583781	0.00112981	0.000183685	0.00080377	0.000889879	0.00927385	0.00354302	0.000247819	0.00251751	0.00121847	0.0112579	0.00330334	0.000593912	0.00389553	0.00756116	0.00153485	0.000329869	0.00190547	0.000624035	0.000513074	0.00545311	0.0060282	0.00274127	0.00397021	0.00782434	0.013375	0.00240244
Glucagon signaling pathway	0.0653684	0.0883251	0.0581926	0.0727378	0.0734433	0.0693277	0.0643211	0.0653002	0.0592009	0.0542381	0.0657676	0.0749475	0.0609016	0.0705225	0.0740556	0.0674099	0.0672045	0.0625384	0.0575039	0.0628877	0.0731463	0.055217	0.0656324	0.0596308	0.095687	0.0631316	0.0682749	0.0535634	0.0640668	0.069103	0.071046	0.0569154	0.0668452	0.0532731	0.0771038	0.0902735	0.0563913	0.085236	0.0732347	0.078134	0.0443613	0.0752299	0.0762118	0.0573487	0.0646948	0.0917562	0.0579145	0.0583216	0.0585901
Glucosinolate biosynthesis	0.0181015	0.0148318	0.0203399	0.026166	0.0152946	0.0202804	0.0188212	0.0150987	0.0142008	0.0164865	0.0174827	0.0204471	0.0108465	0.0176561	0.012149	0.0179375	0.020286	0.0166635	0.0167597	0.0188609	0.0223301	0.0132441	0.014139	0.0188127	0.0129548	0.0188434	0.0200148	0.0156413	0.018763	0.016548	0.0163953	0.0220514	0.0191595	0.0169668	0.020758	0.0166935	0.0155862	0.0153654	0.0156315	0.0159172	0.0230942	0.0170537	0.0164315	0.0184428	0.0267268	0.0137323	0.0140811	0.0117655	0.0180145
Glutamatergic synapse	0.039928	0.0206826	0.0466852	0.0309078	0.0364113	0.0341398	0.0287826	0.0409329	0.0355794	0.029878	0.0411256	0.0403346	0.0409518	0.0330347	0.0318419	0.0451541	0.0371028	0.0335673	0.0348874	0.0329702	0.0343845	0.0332467	0.0370093	0.0334168	0.0295415	0.026435	0.0283263	0.0307302	0.0290087	0.036836	0.0301623	0.0373651	0.0354799	0.0330282	0.0218378	0.0200783	0.0340516	0.0332952	0.0327639	0.0387363	0.0273658	0.0307265	0.0354016	0.0298879	0.0320768	0.020817	0.028595	0.0254186	0.0304236
Glutathione metabolism	0.213153	0.364317	0.156683	0.167733	0.223764	0.203342	0.221654	0.223257	0.242151	0.294238	0.169694	0.215067	0.175342	0.224613	0.282981	0.192379	0.183191	0.229518	0.257922	0.249571	0.195028	0.300933	0.306146	0.187191	0.321051	0.261309	0.155535	0.291396	0.204812	0.169053	0.258547	0.151476	0.297995	0.268654	0.310014	0.280202	0.254237	0.20118	0.202067	0.224494	0.20788	0.181863	0.271929	0.187129	0.195567	0.3031	0.284559	0.362386	0.180857
Glycerolipid metabolism	0.269334	0.419305	0.2512	0.386676	0.340074	0.353177	0.339138	0.323002	0.335119	0.277085	0.288444	0.361515	0.363248	0.349903	0.330608	0.312441	0.256923	0.319422	0.30377	0.354298	0.351034	0.335398	0.341357	0.305666	0.489055	0.30712	0.390684	0.381418	0.334707	0.36926	0.396387	0.316739	0.31762	0.297623	0.576977	0.520048	0.396788	0.37718	0.361698	0.360909	0.220938	0.391459	0.368779	0.393955	0.263244	0.483208	0.419991	0.432873	0.29121
Glycerophospholipid metabolism	0.628297	0.657488	0.692182	0.700895	0.641122	0.662319	0.623932	0.758502	0.721049	0.777796	0.664418	0.621569	0.595964	0.736942	0.724915	0.69841	0.679517	0.780534	0.643129	0.767436	0.65523	0.749141	0.700423	0.659064	0.807177	0.620192	0.725641	0.776904	0.676196	0.759062	0.642182	0.882364	0.642873	0.716114	0.882396	0.629016	0.610809	0.611587	0.752819	0.677867	0.672146	0.760444	0.722754	0.736885	0.580096	0.636367	0.75878	0.722675	0.750837
Glycine, serine and threonine metabolism	0.471613	0.464256	0.609058	0.421896	0.546243	0.457632	0.450917	0.557193	0.513381	0.484628	0.480524	0.559107	0.479962	0.490984	0.473781	0.410421	0.452021	0.522952	0.481294	0.518285	0.475472	0.540961	0.426786	0.431669	0.391957	0.411606	0.38173	0.513466	0.430937	0.470802	0.449098	0.551145	0.523533	0.504664	0.340853	0.413044	0.54985	0.394626	0.410763	0.504794	0.418386	0.401632	0.480761	0.490263	0.485663	0.413588	0.495339	0.527976	0.480571
Glycolysis / Gluconeogenesis	0.465767	0.638431	0.495839	0.520447	0.539261	0.547138	0.503265	0.530328	0.488678	0.478635	0.513706	0.498049	0.626094	0.496447	0.541933	0.489162	0.478331	0.534125	0.522943	0.489079	0.515728	0.52515	0.571687	0.527358	0.570891	0.466239	0.559307	0.51087	0.494004	0.524875	0.519021	0.53338	0.540899	0.523012	0.444602	0.852771	0.554284	0.547282	0.54268	0.516494	0.450604	0.503029	0.515928	0.505416	0.444625	0.532911	0.549462	0.546802	0.480104
Glycosaminoglycan degradation	0.101845	0.0298467	0.139999	0.0758701	0.113287	0.096809	0.106647	0.136555	0.0680494	0.0782152	0.115426	0.103267	0.132879	0.0981118	0.0821738	0.0650477	0.114544	0.0990054	0.12222	0.086708	0.0827231	0.0970514	0.0734486	0.0702741	0.0730882	0.101265	0.0847657	0.0722062	0.0403837	0.0947989	0.0632944	0.113546	0.130599	0.0866125	0.0132977	0.0685829	0.111433	0.0729938	0.058869	0.0998602	0.08387	0.0601948	0.103557	0.0685142	0.160395	0.0305072	0.0439513	0.0558876	0.0777516
Glycosphingolipid biosynthesis - ganglio series	0.0334913	0.00642638	0.0737481	0.0343815	0.0526146	0.0426586	0.0430213	0.0620707	0.0247184	0.0289962	0.0465593	0.0482212	0.0525664	0.036883	0.0291146	0.028217	0.046275	0.0412398	0.0518515	0.0397985	0.0329956	0.0393267	0.0265775	0.0277706	0.0252957	0.0344211	0.0260396	0.0270252	0.0120177	0.0435326	0.016802	0.060603	0.0579633	0.0269621	0.0117936	0.00883877	0.0368733	0.029574	0.0273652	0.0445113	0.0374133	0.0169764	0.0384151	0.0314908	0.0643519	0.0036755	0.0145974	0.0201761	0.0368812
Glycosphingolipid biosynthesis - globo and isoglobo series	0.0841372	0.0461457	0.12287	0.0850752	0.102082	0.0993101	0.0862781	0.111013	0.0711132	0.0623576	0.086799	0.0854342	0.142893	0.0878028	0.0635824	0.0797707	0.0882343	0.077003	0.104057	0.086798	0.0933937	0.0901934	0.0831185	0.0985035	0.085142	0.0963312	0.0732208	0.072459	0.0564558	0.0859489	0.0787969	0.121845	0.119293	0.0802471	0.0310667	0.0872232	0.0814588	0.0753762	0.0974878	0.0907944	0.116619	0.0765826	0.0903768	0.0847426	0.12633	0.0373064	0.0554922	0.0624001	0.0905758
Glyoxylate and dicarboxylate metabolism	0.359497	0.353337	0.385608	0.313116	0.353194	0.339045	0.386633	0.346242	0.419835	0.467089	0.359981	0.388927	0.395896	0.346517	0.432637	0.371214	0.403426	0.411783	0.39391	0.395846	0.371095	0.44904	0.39128	0.360189	0.269589	0.292605	0.354163	0.464565	0.355029	0.352201	0.359204	0.343165	0.412015	0.381716	0.163966	0.285039	0.393987	0.328144	0.311706	0.34503	0.3075	0.305207	0.359814	0.364026	0.4148	0.372819	0.375868	0.456821	0.374236
Hepatocellular carcinoma	0.00249498	0.0144611	0.000688244	0.00366512	0.00197313	0.000805233	0.0121789	0.00243838	0.00596954	0.0104545	0.00335962	0.00468032	0	0.00388038	0.00541682	0.00116645	0.00128971	0.00760819	0.0100978	0.0089852	0.00594886	0.0127358	0.00611586	0.000886063	0.00314895	0.00324947	0.00236413	0.0128515	0.0106058	0.00454293	0.0104095	0.00411286	0.00634785	0.00985763	0.00319828	0.0128555	0.0167033	0.00199305	0.000699985	0.0103522	0.00143578	0.00224625	0.00709726	0.00381419	0.00303984	0.0164864	0.0215862	0.0375091	0.00182454
HIF-1 signaling pathway	0.0327978	0.0395806	0.0351143	0.0379902	0.0432272	0.0409941	0.0345707	0.0325114	0.031955	0.0280239	0.0379712	0.037151	0.0320411	0.0378202	0.0339876	0.0354927	0.0332882	0.0361391	0.0349555	0.0341148	0.0409371	0.0367234	0.0329958	0.0355963	0.0477472	0.0305986	0.0336001	0.0312575	0.0315986	0.0401631	0.0343463	0.0343334	0.0377626	0.0306068	0.041977	0.0532231	0.0289369	0.0437011	0.0369809	0.038144	0.0225095	0.0374582	0.0378283	0.0339044	0.0347852	0.0453203	0.0292035	0.0259493	0.0314843
Histidine metabolism	0.299966	0.228807	0.388906	0.286706	0.320665	0.319956	0.260211	0.3308	0.258933	0.228543	0.357362	0.317503	0.352564	0.296314	0.222745	0.293417	0.345026	0.280594	0.326454	0.32553	0.279873	0.23349	0.215917	0.275536	0.20724	0.273501	0.267316	0.22571	0.245192	0.33883	0.228044	0.370879	0.308153	0.309073	0.0341399	0.238032	0.284536	0.253157	0.243426	0.304877	0.269958	0.249731	0.264427	0.276155	0.308119	0.190781	0.272273	0.235831	0.309477
Homologous recombination	2.1661	1.86474	2.05393	2.02897	1.84408	1.96612	1.90103	1.97161	2.05272	1.69141	2.05561	1.8896	1.77818	2.08855	1.91343	2.09367	2.00438	1.91328	2.0822	1.90242	1.91942	1.80921	2.0126	2.13665	1.91435	2.18825	2.02098	1.71344	1.95949	2.05784	1.93573	2.06111	1.77211	1.9866	2.03333	1.86516	1.60627	2.01474	2.17146	2.12886	2.27632	2.12582	1.98105	1.72828	1.90985	1.7938	1.71462	1.5534	2.25665
Human papillomavirus infection	0.0126586	0.00937068	0.0105029	0.0107611	0.00950263	0.0098609	0.0107981	0.00982692	0.0111704	0.0101157	0.00963609	0.0115655	0.0100277	0.0116791	0.00996142	0.0118441	0.0117815	0.0106776	0.0111366	0.00903544	0.0103598	0.011463	0.0114857	0.010945	0.0107947	0.0119152	0.0110132	0.00953599	0.0113115	0.0103225	0.0103189	0.0120226	0.00948269	0.0117439	0.0105206	0.011101	0.0087592	0.0109729	0.011559	0.0110046	0.0141035	0.0130371	0.0109159	0.00976252	0.0115878	0.0104883	0.0103221	0.0101799	0.0112146
Human T-cell leukemia virus 1 infection	0.00441145	0.000519	0.0112951	0.00216661	0.010797	0.00741431	0.00245076	0.00634147	0.00870769	0.00594699	0.00212661	0.00994982	0.00297406	0.00561379	0.00302693	0.00203439	0.0109353	0.0129548	0.00401321	0.00844161	0.00672743	0.00484706	0.00290693	0.00377742	0.00433082	0.00280204	0.00300902	0.00438045	0.00125695	0.0125078	0.00330431	0.017991	0.00612637	0.00526039	0.000227327	0.00100161	0.00806838	0.00675158	0.00155167	0.00391889	0.00134214	0.00260169	0.00278063	0.0120714	0.00294706	0.00250743	0.00483164	0.00205272	0.00364885
Huntington disease	0.00675892	0.0231743	0.0190788	0.00577231	0.0159014	0.0108061	0.0176339	0.0148556	0.0139796	0.0213546	0.0164115	0.014887	0.0142698	0.00704968	0.0138655	0.00763948	0.0113505	0.0212113	0.0117535	0.0170603	0.0106031	0.0170425	0.0160729	0.00614052	0.00802997	0.0054906	0.00601122	0.0199251	0.00829363	0.0187903	0.0132587	0.0162042	0.0184046	0.0108124	0.0292	0.0154855	0.0192706	0.0113433	0.00260161	0.0146122	0.00255362	0.00427672	0.0104371	0.0124044	0.0116976	0.020354	0.0178263	0.0202558	0.00620413
IL-17 signaling pathway	0.011695	0.00325054	0.011394	0.0101786	0.00681508	0.00964892	0.00913816	0.00881586	0.0109411	0.00930906	0.00872933	0.00714163	0.0130846	0.00981338	0.00951761	0.010239	0.00985995	0.00969565	0.0110865	0.00801086	0.00883926	0.00958289	0.00862733	0.0123209	0.00573252	0.00915638	0.00997931	0.00984633	0.00990596	0.0121402	0.00615764	0.0115237	0.00667361	0.00876745	0.000757123	0.00488321	0.00842286	0.00809978	0.00936786	0.00832656	0.0104995	0.0105426	0.0083545	0.00922649	0.00858299	0.00433871	0.00887591	0.00620312	0.0142212
Inositol phosphate metabolism	0.0686097	0.0801574	0.123923	0.103363	0.0944264	0.0731823	0.0632225	0.105128	0.0930612	0.0643244	0.0927204	0.0786508	0.0723223	0.0834737	0.0847838	0.0858022	0.0717627	0.0749625	0.115536	0.0829294	0.0943707	0.0966342	0.0703517	0.0924778	0.0645536	0.0850977	0.0996708	0.0859102	0.0854224	0.077921	0.0930647	0.0977694	0.0868362	0.105451	0.133102	0.104229	0.13618	0.0624719	0.0792083	0.0736615	0.121494	0.0722328	0.0957199	0.077699	0.0793739	0.0497224	0.141225	0.183175	0.0868959
Insect hormone biosynthesis	0.00252611	0.00195195	0.00112445	0.00161407	0.000816192	0.00255107	0.00164604	0.00227726	0.00164979	0.00133146	0.00184309	0.000925114	0.00304348	0.00169532	0.00147165	0.00136735	0.00140067	0.00239133	0.00151369	0.00201959	0.00231301	0.00085874	0.000756095	0.00230999	0.00115995	0.00119468	0.00202364	0.00161428	0.00166256	0.00278923	0.00224784	0.00234489	0.00211587	0.00280083	0.000794118	0.000831265	0.00150827	0.00180193	0.00191076	0.00148796	0.00114279	0.00151761	0.000585965	0.00217454	0.00232258	0.000718353	0.00191954	0.00114091	0.00265195
Insulin resistance	0.0791904	0.0586696	0.0764307	0.0807112	0.0661731	0.0622738	0.0643956	0.0708185	0.0698268	0.0551363	0.0680397	0.0681529	0.0655736	0.0762463	0.0677724	0.0718142	0.0750756	0.0610305	0.0653407	0.0698518	0.081154	0.0610736	0.0527157	0.0748861	0.0729273	0.063811	0.0688527	0.063545	0.0727089	0.0675552	0.0771353	0.0653268	0.0585631	0.0587725	0.10685	0.0585519	0.0582669	0.0714936	0.0742378	0.0690507	0.0525755	0.0808793	0.0713987	0.0622136	0.0680449	0.0801942	0.0614745	0.0597034	0.065818
Insulin signaling pathway	0.071706	0.0410155	0.0419184	0.0719898	0.0905477	0.0610801	0.0567168	0.0607279	0.0636291	0.06596	0.0510835	0.116166	0.10841	0.0661903	0.0517829	0.0728132	0.0932649	0.059589	0.108643	0.0777404	0.0602584	0.094251	0.0468921	0.074993	0.0680054	0.0493341	0.0815144	0.073434	0.0655482	0.071033	0.0543213	0.0565015	0.0736564	0.0954306	0.0840247	0.0374009	0.0938242	0.0801597	0.0703902	0.0667043	0.0630317	0.0603595	0.0576414	0.0884473	0.0517	0.0651163	0.0459963	0.0575676	0.107223
Isoquinoline alkaloid biosynthesis	0.0135474	0.00937276	0.0140732	0.0121674	0.0119237	0.00951889	0.0114111	0.0123229	0.0135932	0.0113415	0.0127101	0.0128357	0.00834484	0.0109436	0.0113681	0.0125059	0.0130454	0.0114893	0.0152078	0.0148623	0.0133323	0.015337	0.0128026	0.015661	0.0112657	0.0153914	0.00931319	0.0148768	0.0115112	0.00954849	0.010873	0.0110697	0.0134121	0.0141412	0.00181791	0.0102442	0.0141584	0.0101292	0.0130579	0.00947619	0.0188118	0.0134044	0.0134324	0.0101126	0.0151207	0.00870074	0.0140672	0.0195373	0.0118938
Legionellosis	0.189683	0.161797	0.217008	0.183547	0.155823	0.189679	0.177665	0.178364	0.179369	0.164126	0.17838	0.167809	0.169817	0.189692	0.167531	0.185883	0.195312	0.176803	0.198074	0.211172	0.181101	0.18626	0.169863	0.191129	0.187305	0.204506	0.217086	0.156731	0.188908	0.200586	0.16931	0.208356	0.14354	0.173255	0.228024	0.170808	0.150369	0.200605	0.195751	0.208739	0.224711	0.212993	0.199018	0.176327	0.188791	0.141688	0.158584	0.140232	0.207532
Limonene and pinene degradation	0.00383535	0.00436229	0.00207316	0.00272556	0.00144224	0.00663875	0.00304891	0.00458642	0.0055446	0.00885573	0.00410506	0.00179588	0.00579893	0.00384509	0.0040091	0.00375058	0.00323376	0.00782516	0.00500639	0.00425519	0.00411122	0.00509816	0.00379719	0.00368191	0.00151349	0.00237461	0.00322575	0.0073034	0.00414357	0.00632278	0.00328077	0.00655385	0.00319494	0.00435331	0.00455844	0.00280821	0.00480708	0.00532024	0.00321127	0.00292169	0.00227116	0.00356287	0.00336339	0.0109806	0.00232258	0.00263027	0.00717697	0.00787649	0.00970612
Linoleic acid metabolism	0.00077762	0.00354939	0.000562431	0.00130662	0.000657714	0.000698015	0.00158076	0.000927108	0.00725216	0.00543978	0.000962265	0.000424511	0	0.000605749	0.0032753	0.00110571	0.00188718	0.00337538	0.00269109	0.00231815	0.000629985	0.0126292	0.00437151	0.000334815	0.000535314	0.000623637	0.000110514	0.00358388	0.00163896	0.000400677	0.00125931	0.0049222	0.00264073	0.00407642	0	0.00199717	0.00383434	0	0.000585497	0.00102732	0.000337822	0.000486847	0.00178929	0.000594999	0.000447167	0.00746959	0.0029896	0.00473188	0.00146365
Lipoic acid metabolism	0.047514	0.0753848	0.0800873	0.0488751	0.088883	0.0605089	0.0711211	0.0795918	0.0580248	0.0882921	0.0802835	0.0745066	0.0502213	0.0774292	0.0691278	0.0370437	0.0609859	0.0830307	0.0699012	0.0748473	0.0582366	0.0822533	0.0625723	0.0301061	0.0653745	0.0410068	0.033337	0.064529	0.0389058	0.0595248	0.0504675	0.0817215	0.0932752	0.0512272	0.0841585	0.133197	0.0734426	0.0470897	0.0323572	0.0737903	0.0299191	0.0401892	0.0660252	0.055121	0.080819	0.0676182	0.0629204	0.0782629	0.0550087
Lipopolysaccharide biosynthesis	0.462589	0.468908	0.550403	0.258902	0.388707	0.273273	0.403771	0.406572	0.512787	0.682689	0.436377	0.390851	0.295731	0.274249	0.469271	0.382091	0.39937	0.553754	0.500281	0.48907	0.317366	0.862132	0.668536	0.470219	0.261087	0.612833	0.158325	0.550315	0.38857	0.292227	0.324168	0.480346	0.552001	0.468109	0.0050711	0.299143	0.433114	0.197804	0.340403	0.376213	0.771398	0.290229	0.453591	0.318957	0.56032	0.385571	0.394637	0.57514	0.385941
Longevity regulating pathway	0.00639663	0.0192795	0.020972	0.00745878	0.0168531	0.0112097	0.0182415	0.0145659	0.012134	0.0213994	0.0175374	0.0118695	0.0140034	0.00828967	0.0138507	0.00906283	0.0123435	0.0202014	0.0121037	0.0161881	0.0106083	0.0150487	0.0150685	0.007801	0.00853877	0.00573588	0.00480144	0.0172745	0.00773402	0.016358	0.00981823	0.0199615	0.0171855	0.0100533	0.0192354	0.013758	0.0152383	0.0106654	0.0024922	0.0149215	0.00143431	0.0052466	0.0108998	0.0127508	0.0139976	0.0185599	0.0135971	0.0172341	0.00682972
Longevity regulating pathway - multiple species	0.175269	0.0845016	0.1786	0.135552	0.137615	0.151576	0.129177	0.131874	0.187403	0.142563	0.176776	0.132385	0.201427	0.166162	0.141602	0.158243	0.151304	0.168518	0.166189	0.148261	0.152397	0.163808	0.207138	0.213707	0.138688	0.159108	0.136175	0.141258	0.183375	0.164302	0.13777	0.187808	0.148844	0.165017	0.0797637	0.0806918	0.144053	0.119346	0.160696	0.141628	0.35544	0.19079	0.157953	0.168292	0.197828	0.0840033	0.142561	0.139798	0.219174
Longevity regulating pathway - worm	0.158746	0.161973	0.17771	0.16316	0.161073	0.176206	0.165389	0.159564	0.173165	0.134136	0.169458	0.148369	0.113009	0.16497	0.150001	0.182278	0.159767	0.155477	0.153003	0.144155	0.164966	0.136193	0.173183	0.174713	0.188693	0.181142	0.163279	0.129248	0.156914	0.19798	0.169603	0.198449	0.146193	0.152468	0.222457	0.170968	0.131983	0.172554	0.171602	0.184541	0.177395	0.199934	0.180404	0.163951	0.171238	0.176282	0.155952	0.120114	0.184106
Lysine biosynthesis	0.391098	0.338384	0.375524	0.3887	0.365799	0.384657	0.39873	0.393701	0.334236	0.304053	0.386988	0.358843	0.360976	0.400621	0.360684	0.424959	0.381267	0.343295	0.344826	0.352128	0.360467	0.323833	0.366257	0.416461	0.450139	0.450062	0.36207	0.319803	0.38004	0.38747	0.398922	0.38517	0.354545	0.346174	0.442772	0.372906	0.328117	0.421959	0.424137	0.411505	0.397829	0.418027	0.406669	0.390035	0.381433	0.37495	0.322321	0.286276	0.359623
Lysine degradation	0.0866795	0.122881	0.122878	0.106324	0.102817	0.107845	0.101799	0.127632	0.19109	0.142527	0.119724	0.144125	0.138584	0.128806	0.156463	0.0833593	0.102424	0.147889	0.136073	0.157226	0.0923043	0.153865	0.0917903	0.0713536	0.0892035	0.048811	0.102135	0.118526	0.0929225	0.151464	0.105264	0.177574	0.13166	0.0994674	0.0312421	0.0737998	0.184158	0.0656295	0.0717139	0.158804	0.0486807	0.0703444	0.089113	0.142592	0.0733044	0.0724039	0.158365	0.180733	0.0895472
Lysosome	0.102665	0.0287055	0.202605	0.116587	0.182784	0.13456	0.121121	0.175138	0.0807447	0.103092	0.181175	0.157704	0.151031	0.12878	0.0982695	0.0817428	0.165159	0.124	0.178627	0.108366	0.132483	0.0916026	0.0765446	0.101417	0.0903879	0.090931	0.112322	0.0918026	0.0543062	0.10181	0.0838462	0.133386	0.194725	0.0924581	0.0949236	0.0456551	0.118672	0.0932375	0.0913384	0.129269	0.12438	0.066499	0.1082	0.102091	0.173548	0.0437157	0.0658268	0.0793362	0.117684
Mannose type O-glycan biosynthesis	0.002227	0.000401758	0.00403036	0.00454032	0.00196759	0.00569194	0.00256043	0.0104608	0.0111241	0.00378238	0.00357286	0.002749	0.000753388	0.00525214	0.00286249	0.00383873	0.00407791	0.00644553	0.00171765	0.00419131	0.00286832	0.00713797	0.00139226	0.00432164	0.00109658	0.00156611	0.00236163	0.00390004	0.0030645	0.0157628	0.0101965	0.005638	0.000585448	0.000314459	0.00908553	0.00347101	0.00192801	0.00457281	0.00620671	0.00834144	0	0.00515301	0.00361708	0.0111686	0	0.0039136	0.0021587	0.00615115	0.00281354
MAPK signaling pathway - fly	0.00537189	0.0169841	0.0164854	0.00564414	0.0152978	0.00928148	0.0152284	0.012773	0.00991562	0.0167366	0.0149502	0.0117426	0.00988736	0.00475008	0.011036	0.00757152	0.0105616	0.0171634	0.0097484	0.0128663	0.00907742	0.0122718	0.0134196	0.0058267	0.007337	0.0049941	0.00444744	0.0145438	0.00629757	0.0135803	0.00889238	0.0143871	0.0144448	0.00789681	0.0192354	0.0126925	0.0129252	0.00963943	0.00201465	0.0129884	0.00111057	0.00427672	0.00734661	0.00842967	0.0104672	0.0170626	0.0120587	0.0139788	0.00519058
MAPK signaling pathway - plant	0.0280746	0.0843157	0.0342523	0.0356575	0.0457437	0.0419893	0.0376027	0.0400266	0.0345423	0.0394871	0.0309875	0.0408201	0.0452069	0.0501442	0.0418697	0.0366054	0.0248404	0.0455564	0.0336078	0.039054	0.0438629	0.0568689	0.0442924	0.0379787	0.0681962	0.0361691	0.0287878	0.0395503	0.0275062	0.0433	0.0512113	0.0398153	0.0467665	0.0297894	0.129721	0.0673099	0.0431935	0.0560937	0.0362968	0.0596029	0.029126	0.0387607	0.0768569	0.0376595	0.0507814	0.0631157	0.0348004	0.0368325	0.0316902
MAPK signaling pathway - yeast	0.00102473	0.00229541	0.00448659	0.00181464	0.00155534	0.0019282	0.00301308	0.00179296	0.00221836	0.00466287	0.0025872	0.000126915	0.00411606	0.00353959	0.00281467	0.00149131	0.00178198	0.00303798	0.00235527	0.00332183	0.00153087	0.00277698	0.00164897	0.0019743	0.00120177	0.000741779	0.000353993	0.00273065	0.00143644	0.00277769	0.000925851	0.00557437	0.0027407	0.00215654	0	0.00106544	0.00231311	0.00102593	0.000477559	0.00193311	0.000323741	0.000969876	0.00355319	0.00432111	0.00353034	0.00149731	0.0015384	0.00325529	0.00163914
Metabolic pathways	15.4158	13.9109	16.1366	15.2855	15.5437	14.6771	15.0413	15.4047	15.0028	14.4332	15.7371	15.2829	14.65	15.0063	14.5702	15.6072	15.3933	14.9935	15.4328	14.9614	14.8645	15.0235	14.9301	15.5852	14.7619	15.5932	14.0358	14.5304	14.8779	15.0175	14.6001	15.3294	15.4567	14.7774	13.7138	14.2839	14.799	14.6365	14.8	15.2181	15.8646	14.9817	15.0761	14.1914	15.7155	13.7084	14.4044	14.5026	15.0384
Metabolism of xenobiotics by cytochrome P450	0.00130231	0.0153568	0.0037036	0.00201345	0.00634822	0.00247613	0.00733282	0.00355129	0.00672988	0.0168272	0.00468751	0.00718883	0.00186503	0.00416792	0.0142605	0.0032309	0.00541344	0.0085232	0.0112382	0.00773803	0.00563894	0.0140332	0.00987711	0.00373452	0.00448078	0.00667899	0.00306765	0.0167045	0.00877086	0.00522253	0.0115024	0.00566431	0.00876461	0.0120346	0.016538	0.0124104	0.0169263	0.00630517	0.000838497	0.00619159	0.000497784	0.00236929	0.00962635	0.00695581	0.00262267	0.0112328	0.0222011	0.0338122	0.00280045
Methane metabolism	0.271705	0.267914	0.297775	0.278741	0.255059	0.300165	0.289678	0.268685	0.347017	0.33296	0.27005	0.28825	0.277355	0.28752	0.310773	0.263992	0.291319	0.330472	0.279396	0.309742	0.272632	0.324081	0.26588	0.255849	0.277016	0.237199	0.261491	0.314036	0.269079	0.281521	0.27352	0.336038	0.311519	0.287883	0.16176	0.239817	0.29821	0.263419	0.274516	0.28597	0.224393	0.282859	0.265625	0.321377	0.273283	0.280493	0.280497	0.301463	0.325765
Microbial metabolism in diverse environments	2.26265	2.55044	2.46496	2.30077	2.49023	2.30824	2.40849	2.39186	2.54779	2.85515	2.30035	2.47246	2.58164	2.45714	2.62296	2.34749	2.32062	2.5746	2.49106	2.63996	2.33349	2.84371	2.65233	2.20846	2.28801	2.32216	2.14131	2.86216	2.38551	2.24574	2.43307	2.46925	2.58295	2.45542	2.15074	2.80168	2.91304	2.26553	2.25046	2.26844	2.06947	2.24896	2.44621	2.61839	2.27305	2.27241	2.80272	3.25107	2.35714
MicroRNAs in cancer	0.073088	0.0545757	0.115659	0.0767379	0.0478676	0.0660875	0.0839095	0.0959182	0.127322	0.0766315	0.0961034	0.106233	0.103143	0.0907019	0.112061	0.128565	0.153389	0.105174	0.0766243	0.0577812	0.0906419	0.113183	0.104003	0.135092	0.0516907	0.0525592	0.120061	0.0883354	0.0941393	0.110953	0.0916964	0.096436	0.0540652	0.0783111	0.032648	0.047212	0.110041	0.0961345	0.127089	0.0894753	0.113075	0.0925886	0.0520096	0.107065	0.0624027	0.0849251	0.105326	0.0844455	0.140433
Mismatch repair	1.47742	1.25141	1.31037	1.50458	1.36332	1.31706	1.30032	1.45365	1.44727	1.15411	1.55647	1.2582	1.40049	1.28974	1.27913	1.42286	1.43317	1.3448	1.44242	1.32192	1.21598	1.36454	1.30792	1.51623	1.33469	1.48221	1.40762	1.21615	1.37271	1.50618	1.28033	1.31577	1.17517	1.25606	1.27476	1.20543	1.22053	1.33958	1.48836	1.55035	1.60819	1.39208	1.54231	1.23914	1.35211	1.26529	1.23121	1.22901	1.51727
Monobactam biosynthesis	0.0903463	0.0827701	0.103361	0.0947903	0.102467	0.0840136	0.0973161	0.0933657	0.0851617	0.0942131	0.106464	0.0894668	0.089515	0.0930254	0.089038	0.0953036	0.0977319	0.0854418	0.0858986	0.092258	0.097391	0.0852542	0.0785861	0.0922475	0.0979235	0.0866407	0.0874521	0.090185	0.0907267	0.0902191	0.0915573	0.0851906	0.0933347	0.0933421	0.0752859	0.0776251	0.0951867	0.086445	0.0821708	0.0939599	0.0833331	0.0916681	0.0915285	0.07765	0.0985617	0.0812573	0.0837943	0.0803279	0.0865719
Naphthalene degradation	0.00829516	0.0232388	0.00882023	0.00787832	0.010587	0.0172697	0.01269	0.0096882	0.00930299	0.0143218	0.00899818	0.0138846	0.0111257	0.0131074	0.016818	0.0105733	0.00886288	0.0106664	0.00989445	0.0142947	0.0111404	0.0174304	0.0123337	0.00620605	0.0171134	0.00969354	0.0126051	0.0139041	0.0111008	0.0105341	0.0168379	0.0115449	0.0137933	0.0107942	0.0376131	0.0140609	0.0121582	0.0143619	0.00741145	0.0134469	0.00361541	0.00961049	0.0129672	0.012785	0.00905359	0.0192824	0.0148117	0.0122372	0.00796934
Necroptosis	0.0859446	0.107457	0.0813509	0.0998288	0.092454	0.0871575	0.0937424	0.0690495	0.0866831	0.0798193	0.085448	0.0924793	0.0764613	0.0810947	0.0831359	0.0865539	0.0760968	0.0796541	0.0775361	0.0864669	0.093647	0.075235	0.0828085	0.0819288	0.0763874	0.0620422	0.07467	0.0747072	0.0890421	0.0859864	0.0978225	0.0692399	0.0817728	0.0709816	0.130061	0.111433	0.077619	0.0831258	0.083477	0.0872456	0.0552656	0.0796199	0.0811865	0.0750277	0.090928	0.120801	0.0757113	0.0876853	0.0818844
Neomycin, kanamycin and gentamicin biosynthesis	0.018476	0.0103296	0.0322957	0.0220411	0.0201011	0.0197107	0.0169164	0.0222211	0.0182956	0.0159447	0.022235	0.021886	0.0179748	0.021654	0.0177663	0.0226424	0.0225674	0.020863	0.0183113	0.0184707	0.0170503	0.0159148	0.0162822	0.0244196	0.0176487	0.0210865	0.0179073	0.0150804	0.0171854	0.021204	0.0141168	0.0278678	0.0162223	0.0160628	0.0149719	0.0187414	0.0197144	0.0183722	0.0229973	0.0191585	0.0213164	0.0189043	0.0149972	0.0300084	0.0201385	0.0112577	0.0126536	0.0127437	0.0192991
Neuroactive ligand-receptor interaction	0.00441145	0.000519	0.0112951	0.00216661	0.010797	0.00741431	0.00245076	0.00634147	0.00870769	0.00594699	0.00212661	0.00994982	0.00297406	0.00561379	0.00302693	0.00203439	0.0109353	0.0127563	0.00401321	0.00844161	0.00672743	0.00484706	0.00290693	0.00377742	0.00433082	0.00280204	0.00300902	0.00438045	0.00125695	0.0125078	0.00330431	0.0178806	0.00612637	0.00526039	0	0.00100161	0.00806838	0.00675158	0.00155167	0.00391889	0.00134214	0.00260169	0.00278063	0.0120714	0.00294706	0.00250743	0.00483164	0.00205272	0.00349554
N-Glycan biosynthesis	0.0244208	0.00372778	0.0453236	0.0244866	0.0283613	0.0200252	0.0233441	0.030124	0.0211448	0.0146827	0.0380434	0.0224958	0.0122006	0.0240378	0.0145451	0.0269555	0.0288127	0.025596	0.0251629	0.0229505	0.0141266	0.0201551	0.0275013	0.028933	0.0171611	0.0320414	0.0142145	0.0185898	0.0226005	0.0240613	0.0343175	0.0348049	0.0251651	0.0182737	0.0189288	0.011927	0.0193624	0.0157505	0.0241275	0.0368881	0.0427719	0.020105	0.0174882	0.0230953	0.0203557	0.00768688	0.00658196	0.0073943	0.0299582
Nicotinate and nicotinamide metabolism	0.632402	0.712723	0.672978	0.608169	0.568188	0.640127	0.627303	0.57629	0.615036	0.582397	0.589867	0.602073	0.567761	0.663669	0.63623	0.65282	0.607703	0.615375	0.618282	0.624173	0.588229	0.654795	0.61705	0.625181	0.579303	0.636144	0.500835	0.575984	0.632278	0.604797	0.580883	0.683227	0.611156	0.593564	0.583345	0.631044	0.578746	0.581711	0.604802	0.616978	0.602632	0.572904	0.633621	0.569561	0.634659	0.532496	0.557866	0.572033	0.61352
Nitrogen metabolism	0.365683	0.485417	0.383896	0.407892	0.416055	0.326015	0.473932	0.341538	0.406188	0.416945	0.413505	0.423287	0.349869	0.35679	0.361474	0.361186	0.38417	0.400172	0.388088	0.414045	0.453253	0.448571	0.398063	0.376291	0.271616	0.412131	0.299868	0.474768	0.429531	0.322437	0.45825	0.270399	0.436727	0.426499	0.33729	0.419519	0.45165	0.341565	0.350029	0.378317	0.416593	0.296726	0.371458	0.37494	0.396025	0.564058	0.429021	0.577158	0.360488
Nitrotoluene degradation	0.0162889	0.0593003	0.0164159	0.0150841	0.00920324	0.0177374	0.0262244	0.0149444	0.0487152	0.0771868	0.0141072	0.0159004	0.0370417	0.0226101	0.0664485	0.0190906	0.0221225	0.0525002	0.029061	0.0425356	0.0272837	0.0753779	0.0508651	0.0144106	0.00984644	0.0216104	0.0084797	0.104039	0.0346764	0.01385	0.0300263	0.0181267	0.0399259	0.0374743	0.00796672	0.02786	0.0496542	0.0149066	0.020634	0.0219894	0.0230095	0.01786	0.0365816	0.0344792	0.040719	0.0354003	0.0404221	0.0559039	0.0245993
NOD-like receptor signaling pathway	0.134143	0.124728	0.0968117	0.132639	0.129701	0.130816	0.130045	0.144787	0.111053	0.10594	0.112078	0.120526	0.119945	0.126129	0.151383	0.14516	0.13117	0.111837	0.125233	0.113536	0.153268	0.110555	0.104431	0.177268	0.126935	0.188255	0.165186	0.0915954	0.126897	0.143715	0.127441	0.116395	0.135355	0.180095	0.0614205	0.128848	0.140516	0.155685	0.115633	0.124954	0.148549	0.156097	0.121958	0.127125	0.138692	0.149113	0.115504	0.0844258	0.147476
Nonribosomal peptide structures	0.00799239	0.0057114	0.0189019	0.00989477	0.0184988	0.0148317	0.0171806	0.0203159	0.00784128	0.0183522	0.00774778	0.0176029	0.0242379	0.0252889	0.0230659	0.0183622	0.0203218	0.0119671	0.0177608	0.0104976	0.0162087	0.0133923	0.0151331	0.0197356	0.0454854	0.0241348	0.0119207	0.0117389	0.0125595	0.0134139	0.020487	0.0132223	0.0109109	0.0044213	0.00565271	0.00544557	0.0130903	0.0232274	0.0280685	0.0196191	0.0131632	0.0267987	0.0313597	0.0227025	0.0135204	0.00665026	0.0152299	0.0161102	0.0122688
Novobiocin biosynthesis	0.0421202	0.0356098	0.0452404	0.0410396	0.0375059	0.0399755	0.0414957	0.0447645	0.0367348	0.0353905	0.0434078	0.0422706	0.0359153	0.0386388	0.0340491	0.0435427	0.0436245	0.0374033	0.0395601	0.0406602	0.0427727	0.0363075	0.030728	0.0417307	0.0310522	0.0404051	0.0405343	0.0361465	0.0367099	0.0402026	0.0364495	0.0435078	0.0404464	0.0424867	0.0301642	0.0364373	0.0359125	0.0408002	0.0363923	0.039817	0.0342835	0.0395308	0.0381489	0.0382631	0.0477001	0.0353456	0.036767	0.0357004	0.0404836
Nucleotide excision repair	1.1444	0.770221	1.12091	1.18358	0.927631	0.940439	0.949997	0.961663	1.023	0.733618	1.01797	0.876124	0.884594	1.08849	0.888949	0.988366	0.980773	0.959461	0.990442	0.925203	1.01602	0.916313	1.03092	1.14971	1.08458	1.03054	1.02909	0.826351	0.985705	1.06666	0.906815	0.985839	0.805551	0.870594	1.13123	0.860866	0.729271	1.05044	1.10787	1.15271	1.05285	1.09677	1.0389	0.959014	1.0576	0.804441	0.848433	0.734994	1.09916
One carbon pool by folate	0.399273	0.333449	0.41768	0.351593	0.413754	0.359977	0.361051	0.41582	0.380974	0.327015	0.396895	0.397087	0.32039	0.354054	0.337187	0.37847	0.388466	0.377937	0.393392	0.355286	0.363438	0.356175	0.345398	0.411858	0.325902	0.39875	0.342926	0.316253	0.351776	0.387445	0.349152	0.387117	0.37159	0.345894	0.359058	0.33343	0.340982	0.359044	0.36355	0.410424	0.402138	0.354519	0.387216	0.334364	0.391368	0.304694	0.316259	0.335769	0.366654
Other glycan degradation	0.826311	0.21089	1.11218	0.84288	1.1305	0.721024	0.879415	0.991973	0.527703	0.536128	1.04019	0.92476	1.15982	0.822791	0.560555	0.725438	1.02621	0.723572	0.919346	0.744785	0.691328	0.652487	0.61838	0.679658	0.570955	0.625938	0.702498	0.652571	0.477452	0.739642	0.507853	0.830776	0.988687	0.634977	1.01991	0.350812	0.689503	0.621275	0.728991	0.683082	0.908661	0.502598	0.665939	0.615787	0.972222	0.337564	0.391149	0.349764	0.726785
Other types of O-glycan biosynthesis	0.002227	0.000401758	0.00403036	0.00454032	0.000363471	0.00487358	0.00256043	0.00079421	0.0106792	0.00378238	0.00209838	0.002749	0.000753388	0.00525214	0.00217519	0.00340925	0.00407791	0.00540463	0.00171765	0.00234813	0.00252621	0.00713797	0.00139226	0.00432164	0.00109658	0.00156611	0.00236163	0.00390004	0.0030645	0.0136768	0.0101965	0.005638	0.000585448	0.000314459	0.00908553	0.00347101	0.00067248	0.00457281	0.00620671	0.00608151	0	0.00515301	0.00296532	0.0111686	0	0.0039136	0.0021587	0.00615115	0.00281354
Oxidative phosphorylation	1.16977	0.742442	1.22011	1.12769	1.07589	1.06253	1.05411	1.21327	1.02483	1.01457	1.10439	1.00552	1.27188	0.988687	0.990834	1.07951	1.09684	1.06393	1.11824	1.0445	1.03794	0.965926	1.00728	1.06086	0.933991	0.980715	1.01598	0.930855	1.05577	1.1051	0.969644	1.14719	1.00047	1.05917	1.31971	0.761677	1.0837	0.965938	1.02558	1.02762	1.17838	0.995428	1.00977	1.03184	1.108	0.728529	1.00326	1.01867	1.08805
Pantothenate and CoA biosynthesis	0.516178	0.567171	0.45585	0.52959	0.452198	0.502719	0.545366	0.452977	0.527775	0.545222	0.496947	0.521039	0.40605	0.577885	0.506955	0.537954	0.541854	0.541039	0.511337	0.473703	0.5517	0.581966	0.510641	0.529541	0.493721	0.50743	0.485871	0.558014	0.522364	0.505528	0.550826	0.521954	0.478852	0.558431	0.436851	0.545792	0.514543	0.52829	0.481687	0.48883	0.481553	0.573225	0.497627	0.513539	0.567899	0.543491	0.448065	0.489647	0.474228
Pathways in cancer	0.0162843	0.0210432	0.013079	0.0150302	0.0098339	0.0111654	0.0232467	0.0145417	0.0196878	0.022621	0.0125912	0.0136592	0.0140131	0.0154936	0.0190174	0.0135053	0.0115949	0.0195409	0.0233699	0.0202639	0.0169129	0.0277301	0.0180036	0.0142912	0.0145287	0.0159277	0.0139205	0.0246999	0.0225541	0.0180664	0.0198438	0.0170357	0.0159211	0.0207292	0.00859861	0.0201677	0.0288912	0.0139133	0.0131389	0.0214092	0.0137451	0.015504	0.0210102	0.0153905	0.0135403	0.0228353	0.0338634	0.0479846	0.017932
Penicillin and cephalosporin biosynthesis	0.0475322	0.00623336	0.044579	0.0518222	0.0611627	0.0680514	0.0429428	0.0726905	0.0223132	0.0289655	0.0738141	0.0370246	0.0394216	0.0530972	0.0467879	0.0307816	0.0637837	0.0276501	0.037078	0.04062	0.0428784	0.0390092	0.037174	0.0464779	0.0344643	0.0313301	0.0296222	0.0261094	0.0306547	0.035052	0.0241339	0.0366523	0.0349503	0.0518306	0.0722672	0.0458313	0.0341505	0.0353225	0.0290503	0.0256779	0.0626723	0.0251809	0.0491119	0.0382133	0.0465239	0.0137088	0.0299934	0.0205238	0.0333437
Pentose and glucuronate interconversions	0.680733	0.500343	0.730428	0.545326	0.904445	0.531224	0.659313	0.718508	0.69042	0.786685	0.715657	0.836861	0.814862	0.621335	0.689895	0.700171	0.776015	0.594347	0.700338	0.668982	0.581041	0.706443	0.707734	0.619069	0.583525	0.647043	0.491381	0.815536	0.65678	0.57383	0.650501	0.538575	0.868055	0.747817	0.304527	0.586437	0.914187	0.559369	0.586068	0.567934	0.698807	0.607885	0.559254	0.653799	0.587629	0.459623	0.672082	0.75414	0.617496
Pentose phosphate pathway	0.480902	0.527975	0.496775	0.554823	0.619036	0.563403	0.542226	0.530162	0.563347	0.522084	0.474978	0.59742	0.664123	0.550024	0.630784	0.529653	0.505477	0.491875	0.50487	0.538688	0.515128	0.524042	0.521171	0.505165	0.547913	0.584895	0.560376	0.497748	0.489947	0.507018	0.586	0.544061	0.542896	0.51769	0.531717	0.534394	0.634765	0.565766	0.557992	0.531274	0.606842	0.544122	0.566688	0.62308	0.481102	0.509558	0.594886	0.572723	0.510387
Peptidoglycan biosynthesis	1.32615	1.28407	1.23676	1.47635	1.2013	1.37337	1.39736	1.18361	1.3252	1.14177	1.35255	1.28805	1.26765	1.30998	1.17632	1.44591	1.30406	1.27509	1.30922	1.20947	1.27445	1.21971	1.28984	1.38336	1.40703	1.4142	1.41983	1.2423	1.42819	1.35319	1.34114	1.27066	1.12796	1.34953	1.41161	1.34924	1.0922	1.47332	1.45849	1.32475	1.32696	1.43458	1.25928	1.34187	1.23619	1.50013	1.23177	1.13112	1.46824
Peroxisome	0.0885312	0.0970561	0.0984243	0.0763656	0.0919329	0.086267	0.0849772	0.103991	0.0811144	0.0809935	0.0943109	0.0784167	0.0855447	0.0800939	0.0789839	0.0800767	0.0778547	0.0860642	0.0809092	0.0774157	0.0779419	0.075076	0.0788953	0.0816926	0.0672126	0.0741933	0.0646627	0.0821915	0.0715382	0.0823274	0.0781902	0.0787917	0.10161	0.0901086	0.111319	0.059469	0.0831015	0.0737999	0.0688561	0.0842291	0.0920138	0.0743649	0.0857516	0.0604549	0.0926002	0.0729937	0.0769199	0.0783276	0.0780457
Pertussis	0.0190429	0.242189	0.0299267	0.0113509	0.0441112	0.0132755	0.105382	0.103813	0.124363	0.257924	0.0333923	0.0455283	0.0858511	0.0328601	0.404865	0.0193975	0.0508904	0.50872	0.134489	0.162602	0.0717273	0.231845	0.160804	0.0124099	0.0149332	0.0577993	0.00664286	0.30215	0.188489	0.0314526	0.122437	0.056001	0.142564	0.145923	0.000100869	0.127124	0.181259	0.0138024	0.0167839	0.0432124	0.0216549	0.0158418	0.139662	0.0956661	0.14693	0.176937	0.247618	0.377477	0.0728101
Phenazine biosynthesis	0.023016	0.00992047	0.0224045	0.0220295	0.0208643	0.0138141	0.0205032	0.0206061	0.0187978	0.0131135	0.021771	0.0205221	0.017894	0.0145376	0.0129924	0.0222079	0.0218849	0.0153789	0.0178691	0.0233875	0.0173802	0.018594	0.0171021	0.02464	0.0130019	0.0216198	0.0224265	0.0142547	0.0204078	0.0236012	0.0166209	0.0132795	0.0216404	0.0141253	0.0219639	0.0193118	0.0149734	0.0167296	0.0181109	0.0217851	0.0264913	0.0144588	0.016863	0.0117173	0.0246606	0.0203501	0.0123854	0.0101481	0.0175112
Phenylalanine metabolism	0.096548	0.131713	0.192201	0.124112	0.208879	0.112892	0.172769	0.202275	0.136262	0.203235	0.199111	0.205505	0.171135	0.13833	0.138092	0.117767	0.164639	0.155197	0.183127	0.193277	0.172558	0.185729	0.164179	0.110975	0.116126	0.0893716	0.110208	0.256846	0.144826	0.126505	0.141575	0.12404	0.172161	0.152866	0.0775753	0.140978	0.319328	0.113983	0.0942493	0.160402	0.0770933	0.0946135	0.154389	0.14593	0.155408	0.0967089	0.251536	0.365017	0.125702
Phenylalanine, tyrosine and tryptophan biosynthesis	0.382165	0.333839	0.380125	0.395223	0.346399	0.360511	0.376907	0.364027	0.351236	0.301921	0.389647	0.372873	0.347065	0.334945	0.315677	0.409143	0.386125	0.333146	0.341691	0.374681	0.37756	0.322678	0.300974	0.400315	0.269209	0.368623	0.391709	0.331348	0.390206	0.371543	0.346269	0.36895	0.340195	0.365905	0.355512	0.298233	0.340367	0.354711	0.360229	0.369885	0.411671	0.334908	0.324139	0.339464	0.426854	0.335617	0.340758	0.309611	0.376977
Phenylpropanoid biosynthesis	0.125998	0.0546262	0.239683	0.169382	0.196476	0.146171	0.110178	0.137295	0.13412	0.128507	0.208725	0.0901892	0.127292	0.152073	0.114623	0.133946	0.144737	0.123157	0.141349	0.115924	0.110077	0.0838253	0.102001	0.132186	0.107578	0.11883	0.103476	0.130283	0.119389	0.144102	0.141436	0.128885	0.160341	0.0954486	0.0228108	0.0627095	0.0826779	0.121734	0.15955	0.139299	0.167734	0.116728	0.110671	0.121338	0.116931	0.0983725	0.0788429	0.100341	0.140257
Phosphatidylinositol signaling system	0.0364425	0.0521306	0.0506695	0.0439469	0.0534458	0.0413776	0.0433308	0.0525611	0.0431494	0.0401246	0.0574417	0.0504067	0.0438961	0.0469282	0.0521829	0.043659	0.0521984	0.0484372	0.0471868	0.0449745	0.0454437	0.0404281	0.0421454	0.034114	0.0479503	0.0377918	0.0392228	0.0421559	0.0401845	0.0438649	0.049239	0.0481439	0.0540811	0.0428391	0.0481935	0.0443448	0.0515307	0.0439216	0.0427191	0.0526816	0.0356394	0.0417779	0.0487298	0.0355241	0.0479324	0.0355683	0.0502625	0.0512095	0.0396113
Phospholipase D signaling pathway	0.00169123	0.00611509	0.00685194	0.00283766	0.00642751	0.00393413	0.00454545	0.00834965	0.00617611	0.00687667	0.00820934	0.00461894	0.00365534	0.0031112	0.00708576	0.00430996	0.00652279	0.0060731	0.00470081	0.00446069	0.00365009	0.00589994	0.00465956	0.00157987	0.00208826	0.00121535	0.00566477	0.00619984	0.00440925	0.0049731	0.00318054	0.00259796	0.00466722	0.00583787	0	0.00388966	0.00755044	0.00441289	0.00325461	0.00571601	0.0016409	0.00203307	0.00472023	0.00284143	0.00354127	0.00270137	0.00860181	0.00750664	0.00376805
Phosphonate and phosphinate metabolism	0.120911	0.20962	0.149293	0.140841	0.186049	0.131561	0.151929	0.189783	0.188627	0.260822	0.153248	0.176377	0.245935	0.181699	0.205649	0.152372	0.158002	0.217004	0.19554	0.181232	0.119081	0.244814	0.18488	0.13484	0.118118	0.123485	0.0867733	0.269499	0.150894	0.174721	0.136948	0.177305	0.197015	0.21056	0.0049355	0.17352	0.266573	0.119321	0.159491	0.149083	0.149283	0.101913	0.164281	0.171035	0.156558	0.115751	0.244124	0.39029	0.16371
Phosphotransferase system (PTS)	0.567809	1.29727	0.407866	0.899003	0.902981	0.779769	0.692539	0.671357	0.563921	0.902354	0.475286	0.686333	1.22142	0.730101	1.03153	0.598762	0.525671	0.619771	0.693284	0.735075	0.898213	0.8476	0.965016	0.598458	1.21984	0.650842	0.96604	0.897083	0.741207	0.608097	1.02131	0.479893	0.848461	0.744329	1.07084	1.89448	0.772916	0.983135	0.735206	0.5976	0.361016	0.82416	0.841383	0.781936	0.591839	1.17462	0.994779	0.891054	0.534345
Photosynthesis	0.331383	0.238371	0.191598	0.364042	0.259968	0.284174	0.290019	0.264422	0.271578	0.236486	0.267633	0.276725	0.258462	0.309762	0.238364	0.349166	0.317601	0.232649	0.290413	0.26791	0.298249	0.202949	0.266675	0.318931	0.279079	0.364848	0.361008	0.232184	0.343911	0.268399	0.2885	0.210853	0.247897	0.331566	0.308297	0.26398	0.198099	0.363799	0.318222	0.291191	0.324174	0.351601	0.250528	0.230765	0.311662	0.261592	0.248171	0.200721	0.328885
PI3K-Akt signaling pathway	0.0117983	0.00327318	0.0126156	0.0112081	0.00681508	0.0100309	0.00933461	0.00912719	0.0123467	0.0100987	0.00965827	0.00726282	0.0143223	0.0104922	0.0104374	0.0106542	0.0104175	0.0106006	0.0118243	0.00816588	0.00940365	0.0115738	0.00903438	0.0131349	0.00581584	0.00949169	0.0108014	0.010088	0.010506	0.0132606	0.00632902	0.0130294	0.00692932	0.00897946	0.0108985	0.00512766	0.00943914	0.00857345	0.011059	0.00901606	0.0106397	0.0112112	0.00976207	0.00982773	0.00965886	0.00461965	0.00973389	0.00733886	0.0156154
Plant-pathogen interaction	0.0513116	0.0389891	0.0632795	0.0480955	0.0557561	0.05021	0.0543363	0.0543437	0.0591632	0.061037	0.056413	0.0547339	0.0531366	0.0569512	0.0730099	0.0593021	0.0759598	0.0694516	0.0603824	0.0567102	0.0587023	0.0507408	0.0472004	0.0546825	0.0547328	0.0504319	0.0750069	0.0888397	0.0566668	0.0707455	0.0434031	0.063593	0.0501498	0.0657394	0.0476935	0.0376421	0.0811927	0.0545839	0.0454539	0.0519287	0.0392678	0.0588972	0.045699	0.0615065	0.0411225	0.0346756	0.0854775	0.0772457	0.0715389
Platinum drug resistance	0.0194927	0.0821607	0.024291	0.0252535	0.0340367	0.0323927	0.0262958	0.0323931	0.0346118	0.0398043	0.0221257	0.0326651	0.0348731	0.040233	0.0380572	0.0289171	0.0184427	0.0443191	0.0280098	0.0327984	0.0346411	0.056334	0.037747	0.0302629	0.0548716	0.0308333	0.0246547	0.0415107	0.02857	0.0362157	0.0468045	0.0326821	0.0402465	0.0273727	0.103793	0.0584226	0.0453318	0.0463155	0.0295352	0.0495534	0.0186235	0.0322545	0.0719269	0.0339424	0.036662	0.0579473	0.0434999	0.0519214	0.0249424
Polyketide sugar unit biosynthesis	0.22103	0.103102	0.194031	0.150777	0.178629	0.131226	0.127607	0.146122	0.147637	0.103306	0.147088	0.154936	0.147885	0.140425	0.140922	0.171562	0.157654	0.125411	0.138399	0.151213	0.179438	0.113652	0.106341	0.175391	0.173895	0.190417	0.127237	0.105477	0.165335	0.119996	0.130027	0.155784	0.166133	0.124262	0.0500234	0.118383	0.103351	0.122786	0.192023	0.149909	0.209566	0.157994	0.146042	0.154645	0.158541	0.133269	0.107847	0.0930509	0.135133
Porphyrin and chlorophyll metabolism	0.656614	0.585165	0.650276	0.665636	0.635199	0.677881	0.687116	0.687215	0.648856	0.60076	0.648435	0.74784	0.860898	0.754068	0.55876	0.73216	0.784165	0.623164	0.71584	0.732284	0.764978	0.641047	0.479721	0.590353	0.469047	0.499851	0.695423	0.736031	0.717275	0.632695	0.650927	0.608426	0.700084	0.735561	0.204001	0.539963	0.893203	0.574677	0.525104	0.599195	0.445822	0.607984	0.53872	0.710058	0.734285	0.519092	0.888711	0.851239	0.691953
PPAR signaling pathway	0.0518639	0.0260862	0.0679453	0.0481625	0.0563985	0.0479831	0.0423835	0.055883	0.0504681	0.0404241	0.0540329	0.0522052	0.0473662	0.061971	0.0516813	0.0573992	0.0589792	0.0514518	0.0499407	0.0469074	0.0560241	0.0381076	0.0417169	0.0516526	0.0517722	0.047658	0.0478317	0.0505461	0.0445385	0.0558619	0.0506474	0.0650406	0.049611	0.0530471	0.0864339	0.0310192	0.0524498	0.0468024	0.053651	0.0514081	0.0461433	0.0584699	0.0471127	0.0526432	0.0453438	0.0294876	0.0538691	0.0386767	0.0592362
Primary bile acid biosynthesis	0.0342415	0.0287595	0.0552235	0.0413266	0.062073	0.0527636	0.0392327	0.0501414	0.0474835	0.0396747	0.0606011	0.0476898	0.0455622	0.0509812	0.0534173	0.0617406	0.066574	0.0399338	0.0346437	0.0426143	0.0553847	0.0200343	0.0314395	0.0485638	0.0726855	0.0301844	0.0498012	0.0369432	0.0306011	0.0545391	0.0376812	0.0390457	0.0574331	0.0289579	0.00754524	0.0378906	0.0428591	0.0611071	0.0465326	0.0487879	0.0208639	0.0518473	0.0651183	0.0423791	0.0458652	0.0187839	0.0362332	0.0272764	0.0440524
Primary immunodeficiency	0.0700141	0.0788992	0.0846145	0.0674649	0.069264	0.0797762	0.0745176	0.0949923	0.0640956	0.0687222	0.0899934	0.0786808	0.0664514	0.0587303	0.0862632	0.0737771	0.0555449	0.0625329	0.0685835	0.073394	0.0741219	0.0641098	0.0613405	0.0668854	0.0807011	0.0690705	0.0852913	0.0613115	0.0654525	0.0825863	0.0891741	0.0645979	0.0751661	0.0660799	0.098973	0.0691849	0.0628784	0.0821879	0.0590607	0.0888408	0.0757019	0.0605409	0.0966098	0.0617762	0.0594758	0.085997	0.0557388	0.0630543	0.0597616
Prion diseases	0.00135898	0.00619016	0.00259348	0.000128172	0.000248885	0.00152462	0.00236324	0.00208256	0.00406398	0.00461803	0.00146134	0.00297947	0.00438245	0.00127175	0.0028295	6.79657e-05	0.000788925	0.00384934	0.00200507	0.00419399	0.00152564	0.00477076	0.00265333	0.000313818	0.000692972	0.000311075	0.00156378	0.00538132	0.00199606	0.00521003	0.00424185	0.0016083	0.0039598	0.00291564	0.000384645	0.00279299	0.00634539	0.00170388	0.000586965	0.00160388	0	0	0.00309048	0.00273028	0.0011416	0.00329147	0.00576756	0.00613887	0.000733876
Prodigiosin biosynthesis	0.0722787	0.0496302	0.0810035	0.0728886	0.0665045	0.0736172	0.0677908	0.0646639	0.0620187	0.0623583	0.0702418	0.0692537	0.0636879	0.0707545	0.062334	0.0771122	0.0744314	0.0719543	0.0696622	0.0686733	0.0722304	0.0559188	0.0778993	0.0774919	0.0736944	0.0767353	0.0823234	0.0601265	0.0691251	0.0821364	0.0491813	0.0869106	0.0666247	0.0770068	0.0489932	0.0551753	0.0689724	0.0769335	0.0741514	0.0673958	0.0714608	0.0768314	0.0629691	0.0736167	0.0673773	0.0479705	0.0615886	0.0575939	0.0698419
Progesterone-mediated oocyte maturation	0.011695	0.00325054	0.011394	0.0101786	0.00681508	0.00964892	0.00913816	0.00881586	0.0109411	0.00930906	0.00872933	0.00714163	0.0130846	0.00981338	0.00951761	0.010239	0.00985995	0.00969565	0.0110865	0.00801086	0.00883926	0.00958289	0.00862733	0.0123209	0.00573252	0.00915638	0.00997931	0.00984633	0.00990596	0.0121402	0.00615764	0.0115237	0.00667361	0.00876745	0.000757123	0.00488321	0.00842286	0.00809978	0.00936786	0.00832656	0.0104995	0.0105426	0.0083545	0.00922649	0.00858299	0.00433871	0.00887591	0.00620312	0.0142212
Prolactin signaling pathway	0.0182424	0.0270945	0.0110079	0.0219678	0.0169851	0.0278115	0.0200535	0.018093	0.0157357	0.0196011	0.0171643	0.0187087	0.0175138	0.0253531	0.0211108	0.0229599	0.018934	0.0161178	0.0166101	0.0131409	0.0238349	0.0130972	0.01807	0.0214981	0.0261345	0.0183528	0.0255705	0.0197934	0.0226409	0.0246253	0.0227732	0.0183126	0.014841	0.017204	0.0312782	0.0255825	0.0160743	0.0274556	0.0246482	0.0191635	0.0108598	0.0293206	0.0174351	0.0256297	0.0153909	0.0231343	0.0187423	0.0172357	0.0210293
Propanoate metabolism	0.410897	0.472947	0.409375	0.432852	0.455273	0.403629	0.469116	0.383037	0.445317	0.597638	0.389862	0.467247	0.463126	0.458157	0.472152	0.452841	0.397361	0.499789	0.489144	0.461262	0.451425	0.458213	0.469519	0.369832	0.39933	0.382022	0.418881	0.600464	0.407801	0.380705	0.441985	0.448047	0.527902	0.427954	0.298412	0.363112	0.575974	0.426145	0.408576	0.382619	0.335251	0.392894	0.405796	0.51132	0.372834	0.420221	0.497005	0.579531	0.428167
Prostate cancer	0.011695	0.00325054	0.011394	0.0101786	0.00681508	0.00964892	0.00913816	0.00881586	0.0109411	0.00930906	0.00872933	0.00714163	0.0130846	0.00981338	0.00951761	0.010239	0.00985995	0.00969565	0.0110865	0.00801086	0.00883926	0.00958289	0.00862733	0.0123209	0.00573252	0.00915638	0.00997931	0.00984633	0.00990596	0.0121402	0.00615764	0.0115237	0.00667361	0.00876745	0.000757123	0.00488321	0.00842286	0.00809978	0.00936786	0.00832656	0.0104995	0.0105426	0.0083545	0.00922649	0.00858299	0.00433871	0.00887591	0.00620312	0.0142212
Protein digestion and absorption	0.156582	0.0275658	0.157005	0.102529	0.16676	0.0633844	0.143072	0.130462	0.0866548	0.0613138	0.164073	0.124674	0.0759424	0.0710291	0.0733534	0.167513	0.12442	0.0808757	0.125157	0.0939811	0.0925214	0.0806058	0.139232	0.146916	0.0874165	0.154327	0.0514996	0.0632645	0.0812177	0.0840619	0.079938	0.116797	0.135446	0.100201	0.0113252	0.0229717	0.09211	0.0650117	0.113529	0.118442	0.240224	0.0885434	0.113147	0.0273515	0.144016	0.0196742	0.0366592	0.0255579	0.116422
Protein export	0.80588	0.772039	0.816055	0.840602	0.793772	0.801167	0.824929	0.831359	0.759386	0.700086	0.867331	0.74291	0.811896	0.723427	0.802432	0.822387	0.815697	0.770671	0.802797	0.774642	0.829162	0.637888	0.774603	0.807444	0.756878	0.865841	0.846657	0.688583	0.778913	0.862906	0.73253	0.783328	0.670913	0.742527	0.698292	0.647124	0.674487	0.807821	0.82798	0.872188	0.730488	0.792567	0.762484	0.752662	0.798156	0.726497	0.689114	0.634058	0.81051
Protein processing in endoplasmic reticulum	0.148276	0.0132144	0.162103	0.111105	0.187131	0.0833164	0.0918426	0.198008	0.118489	0.0862128	0.136388	0.170841	0.0924996	0.131039	0.106627	0.157104	0.160781	0.0998737	0.120386	0.0942143	0.128671	0.117152	0.117748	0.228086	0.0827702	0.299536	0.0583368	0.0823275	0.0940633	0.122502	0.0728961	0.156718	0.144484	0.142785	0.0493259	0.0584311	0.138298	0.104415	0.174975	0.121062	0.251448	0.125056	0.13577	0.0769946	0.100223	0.0236449	0.0829358	0.0456534	0.141999
Proteoglycans in cancer	0.0633916	0.0612539	0.0593944	0.0533793	0.066057	0.0618024	0.0570162	0.0534421	0.0548655	0.0460185	0.0562688	0.0572287	0.0498623	0.0565517	0.0578302	0.0599445	0.0595992	0.0520891	0.0542178	0.0556226	0.0542831	0.0522	0.0590104	0.0641664	0.0639776	0.0724318	0.0491029	0.048866	0.0564225	0.0588057	0.0570083	0.0667074	0.0537811	0.0589472	0.0505347	0.0619733	0.0428052	0.0543696	0.0594095	0.0584516	0.0732423	0.0617622	0.0600329	0.0542821	0.0749123	0.0487005	0.0452306	0.0456334	0.0540114
Proximal tubule bicarbonate reclamation	0.00656942	0.00536366	0.0094209	0.00482302	0.0100999	0.00650938	0.00628093	0.0129877	0.00886849	0.00972585	0.00998168	0.0144618	0.0113753	0.00781568	0.00909298	0.00601557	0.0106516	0.00966514	0.0118427	0.00859434	0.00767554	0.0142638	0.00908723	0.0046039	0.00668701	0.00400701	0.00431342	0.00967458	0.00486533	0.00950865	0.00657133	0.0105173	0.0133379	0.0105095	0.00976029	0.00485416	0.0140099	0.0055726	0.00553556	0.010231	0.00636062	0.00527636	0.0116818	0.00728248	0.00796943	0.00443153	0.00859328	0.00947303	0.00603283
Purine metabolism	2.01283	2.11286	1.79682	2.00936	1.89156	1.97344	2.06724	2.01518	2.03184	2.01314	1.90649	1.93574	1.89677	1.93395	2.05792	1.92051	1.84893	1.96608	2.02584	1.89348	2.00068	2.01244	2.03778	1.9976	2.05638	2.21339	1.96094	1.99979	1.97037	1.94412	2.10398	1.81508	1.95639	2.02317	2.15647	1.95088	1.87435	2.09727	1.91576	2.01639	2.30785	2.07834	2.06395	1.85526	1.95757	2.04671	1.97239	1.87325	2.03464
Pyrimidine metabolism	1.50115	1.39906	1.4054	1.46727	1.39633	1.43335	1.4619	1.5092	1.51544	1.40826	1.41929	1.37303	1.27549	1.3688	1.4758	1.51219	1.37406	1.49319	1.43693	1.31173	1.3647	1.44067	1.47054	1.52641	1.47617	1.55472	1.37998	1.32589	1.44286	1.4927	1.46633	1.43645	1.39093	1.37718	1.48687	1.32942	1.30527	1.49775	1.553	1.60231	1.53221	1.49988	1.50129	1.3755	1.37287	1.45372	1.33897	1.30476	1.53752
Pyruvate metabolism	0.703837	0.756411	0.796962	0.760832	0.84078	0.785992	0.831546	0.833398	0.793663	0.747697	0.880378	0.824666	0.852128	0.803336	0.745836	0.749802	0.719126	0.805972	0.759098	0.792672	0.755134	0.775516	0.758579	0.671257	0.811253	0.690993	0.722828	0.787193	0.732398	0.792603	0.764443	0.778303	0.840078	0.677598	0.726523	0.853054	0.83954	0.789057	0.722658	0.823353	0.568175	0.743435	0.705861	0.813865	0.707846	0.903052	0.79592	0.886398	0.718717
Quorum sensing	1.81275	2.66857	1.46948	2.0297	1.91861	2.43155	1.90512	1.78769	1.84502	1.9199	1.70948	2.2837	2.22944	2.12785	1.85653	1.65108	1.47505	1.8116	1.79528	2.05825	2.36797	1.79118	1.63883	1.63868	2.23214	1.46317	2.42149	2.10725	2.16461	1.78525	2.58924	1.79872	1.77237	1.98469	2.97988	2.28879	2.50336	2.07597	2.15845	1.86184	1.28542	2.01193	2.32237	2.46836	1.76701	3.27912	2.68388	2.24033	1.87311
Renal cell carcinoma	0.00206628	0.0033315	0.00099673	0.00118651	0.00104569	0.000711277	0.00192965	0.00328743	0.00277716	0.00285746	0.000502256	0.00183724	0.000928469	0.00179985	0.00408295	0.00209987	0.000445232	0.0022371	0.00218559	0.00326787	0.00212479	0.00541139	0.0032604	0.00108431	0.00564726	0.00352182	0.00157708	0.00200199	0.00204234	0.00138334	0.0032767	0.00139917	0.00289967	0.00210416	0.00440114	0.00242896	0.00376507	0.00382044	0.00307106	0.00273044	0.00180974	0.00271516	0.00555846	0.00234984	0.00191749	0.00201016	0.00340129	0.00427239	0.00188626
Renin-angiotensin system	0.0129808	0.00253314	0.0415137	0.00923739	0.00622062	0.0185521	0.00813815	0.00627758	0.0107148	0.00976131	0.00595438	0.00946227	0.00571462	0.019228	0.00779155	0	0.0161354	0.0324468	0.0383974	0.0212879	0.0057173	0.0378612	0.0110693	0.0127093	0.0168197	0.0140644	0.00873343	0.00797137	0.00331512	0.0342073	0.00475486	0.0543353	0.0188233	0.0334561	0.00636951	0.011742	0.00190385	0.0020652	0.00908241	0.0218779	0.0283479	0.016851	0.0167376	0.0358711	0.00290725	0.00434608	0.00138948	0.00819506	0.0127718
Retinol metabolism	0.00402159	0.0076126	0.0399529	0.00738763	0.0256984	0.011107	0.0053708	0.00816654	0.00512353	0.0180732	0.00548857	0.0165231	0.00759882	0.0261704	0.0104815	0.00574608	0.00656824	0.0407223	0.0243026	0.0255644	0.0204378	0.0105669	0.0038608	0.0152474	0.0257904	0.00811268	0.0119345	0.0218566	0.003207	0.0212162	0.00806441	0.0529022	0.0253593	0.00474338	0.0182889	0.00370667	0.00755499	0.0122531	0.00939562	0.0115458	0.0233434	0.00743159	0.0088529	0.0306452	0.0221218	0.0152524	0.0083737	0.0129187	0.00559003
Riboflavin metabolism	0.210099	0.212364	0.168963	0.154328	0.17665	0.166217	0.182726	0.186461	0.180143	0.211308	0.143411	0.179002	0.146731	0.151516	0.189255	0.18363	0.186571	0.18033	0.21594	0.169889	0.165372	0.220547	0.270574	0.225976	0.168643	0.28914	0.168795	0.213306	0.193446	0.12567	0.149974	0.157154	0.201209	0.208137	0.104145	0.201351	0.192225	0.162166	0.180987	0.154188	0.276883	0.193476	0.19859	0.132923	0.187294	0.153535	0.172879	0.210974	0.185047
Ribosome	4.84053	5.02349	4.8372	4.87625	4.74213	5.24649	4.91935	5.08328	4.4271	4.03724	5.20072	4.75845	4.08798	4.99581	4.94023	5.25191	5.27025	4.41763	4.36321	4.22299	5.35764	3.86491	4.79477	4.64138	5.10158	5.49091	5.39302	3.71972	4.71345	5.82247	4.99046	5.24033	4.29161	4.56632	6.68458	5.13347	3.63711	5.37273	5.56498	5.53465	5.59607	5.70915	5.02138	4.26949	4.96782	5.19568	4.20016	3.3049	5.26033
Ribosome biogenesis in eukaryotes	0.0677535	0.11806	0.0705726	0.0541741	0.0803159	0.0655543	0.0677792	0.0588184	0.0785711	0.0793309	0.0583978	0.0588444	0.0526255	0.0773129	0.0931652	0.0653656	0.0622025	0.0794885	0.0731748	0.0737865	0.102729	0.0875157	0.084559	0.0690408	0.0701092	0.0830546	0.0491029	0.0843996	0.0721045	0.0606025	0.111522	0.0832596	0.0775378	0.0769644	0.123316	0.0972441	0.0653213	0.063329	0.0861509	0.0724285	0.0826019	0.0738093	0.128107	0.0671253	0.0975158	0.0725872	0.0807189	0.0987173	0.0729297
RNA degradation	1.65876	1.15708	1.42821	1.31348	1.34908	1.22915	1.28776	1.3699	1.30375	1.05271	1.35164	1.23989	1.16545	1.36748	1.16682	1.46603	1.36962	1.30072	1.32504	1.2472	1.30801	1.30511	1.45093	1.43845	1.28486	1.40813	1.18614	1.1661	1.47914	1.28263	1.29495	1.4077	1.24726	1.24689	1.28547	1.26551	1.07527	1.31606	1.36968	1.38741	2.15816	1.37211	1.32842	1.25596	1.55192	1.16686	1.0791	1.02025	1.25719
RNA polymerase	0.692039	0.616186	0.532564	0.715353	0.559248	0.677086	0.498263	0.677199	0.563196	0.414074	0.610633	0.543095	0.44135	0.713056	0.551978	0.574508	0.524662	0.587843	0.610035	0.634499	0.591693	0.505994	0.567162	0.62647	0.658753	0.636576	0.626244	0.385602	0.597295	0.65898	0.609316	0.603193	0.459616	0.513471	0.728145	0.639141	0.372218	0.58693	0.684617	0.680185	0.524225	0.774585	0.644004	0.593724	0.642066	0.646247	0.456742	0.485911	0.671576
RNA transport	0.304267	0.194983	0.287962	0.318352	0.233404	0.2624	0.323882	0.285799	0.301007	0.259065	0.298672	0.274761	0.236461	0.225814	0.243203	0.312782	0.286461	0.245916	0.26702	0.286883	0.232377	0.227554	0.277411	0.31026	0.267596	0.286149	0.261168	0.268909	0.270859	0.254578	0.214609	0.242147	0.235627	0.252834	0.209811	0.210037	0.261351	0.292471	0.300116	0.277958	0.235788	0.278552	0.221126	0.239983	0.252818	0.205848	0.232637	0.225821	0.275913
Salmonella infection	0.00967354	0.123259	0.0149137	0.0137563	0.017547	0.0108828	0.0535219	0.020655	0.0848061	0.16629	0.0154926	0.0160487	0.0196108	0.0192218	0.0959455	0.0189506	0.0463387	0.105169	0.0673517	0.0623042	0.0309131	0.133834	0.119614	0.0212799	0.0147479	0.0269853	0.0314187	0.145425	0.0681678	0.0171067	0.0602385	0.0139588	0.0679478	0.0904708	0.00977323	0.0791148	0.0768331	0.0260294	0.0103569	0.0346114	0.0167916	0.0159476	0.0502114	0.0659539	0.00852442	0.082288	0.124181	0.170289	0.0371811
Secondary bile acid biosynthesis	0.0381226	0.0550136	0.0646311	0.079188	0.0639228	0.0893005	0.0456961	0.0839999	0.12101	0.0801677	0.0736883	0.0642209	0.116723	0.0623291	0.0936405	0.0666927	0.0770376	0.086279	0.0507865	0.0542444	0.130444	0.131925	0.056197	0.0781746	0.0777934	0.0394383	0.0818025	0.0725538	0.0460362	0.106794	0.0816072	0.0721482	0.090153	0.0419703	0.00568622	0.0487901	0.0669037	0.0890382	0.0766405	0.066343	0.0356164	0.0819004	0.112649	0.0694358	0.055118	0.0655004	0.0759563	0.111109	0.0721168
Selenocompound metabolism	0.507674	0.508085	0.489323	0.517496	0.436456	0.557228	0.472976	0.449208	0.512022	0.518139	0.456341	0.50752	0.507123	0.523028	0.523128	0.518339	0.458764	0.488786	0.44375	0.525846	0.553435	0.525786	0.506564	0.526701	0.495404	0.46229	0.52713	0.509336	0.512055	0.486552	0.537264	0.514572	0.469482	0.512544	0.433058	0.470388	0.526668	0.478616	0.549132	0.47673	0.482683	0.531987	0.567955	0.486856	0.60638	0.53401	0.526998	0.452432	0.501288
Sphingolipid metabolism	0.286629	0.118042	0.361058	0.288185	0.35752	0.244466	0.233735	0.314939	0.201554	0.208311	0.319677	0.27069	0.391664	0.282025	0.213991	0.218553	0.361555	0.264831	0.317547	0.250893	0.246948	0.239604	0.237448	0.276972	0.24759	0.276265	0.26048	0.225149	0.191173	0.249168	0.219235	0.279899	0.34987	0.242475	0.186889	0.147354	0.211	0.228262	0.237637	0.265197	0.334894	0.213563	0.248467	0.206803	0.33657	0.120022	0.158127	0.157998	0.249196
Staphylococcus aureus infection	0.0225641	0.145389	0.000528204	0.0454171	0.0908375	0.0742955	0.0651808	0.0438244	0.014943	0.0153148	0.0445277	0.0665163	0.0176866	0.0242775	0.0339343	0.0259883	0.0219388	0.0313683	0.0193138	0.0416551	0.0405162	0.0132213	0.0395703	0.0406219	0.0960047	0.040101	0.0418474	0.0208797	0.0282478	0.0369619	0.0597906	0.0174738	0.0432221	0.00955062	0.338503	0.0705483	0.0271424	0.0741732	0.0321268	0.067059	0.0103456	0.0463386	0.0639466	0.0372059	0.0166071	0.168757	0.0181785	0.0145422	0.00150494
Starch and sucrose metabolism	1.23142	1.51841	1.49342	1.47023	1.73016	1.39534	1.31397	1.32452	1.20554	1.17544	1.56969	1.23684	1.41252	1.30956	1.30009	1.30451	1.19625	1.15588	1.31135	1.30935	1.35948	1.06086	1.38679	1.4202	1.65597	1.23467	1.51296	1.36145	1.4777	1.45305	1.56982	1.25269	1.31301	1.26891	1.29066	1.99359	1.18816	1.61668	1.40463	1.38311	1.18577	1.48208	1.46927	1.34633	1.17165	1.58929	1.3189	1.34566	1.25097
Steroid hormone biosynthesis	0.0372591	0.0198914	0.0819798	0.0281797	0.0649028	0.0550718	0.0481033	0.0929928	0.0364775	0.0536575	0.0714892	0.0664926	0.0513693	0.0459386	0.0449272	0.0312983	0.113771	0.0617436	0.0571036	0.0625861	0.0302673	0.0344081	0.0278093	0.0163523	0.038981	0.00327735	0.0235266	0.032264	0.0159841	0.0592435	0.0288758	0.063507	0.0878727	0.0297418	0.00352335	0.0064393	0.0472322	0.0378167	0.0108656	0.0619084	0.0090015	0.0103937	0.0305453	0.0408162	0.0772293	0.00901146	0.0322614	0.0149771	0.0227082
Streptomycin biosynthesis	0.276715	0.153053	0.274792	0.221936	0.236571	0.182441	0.183408	0.207908	0.200881	0.144799	0.214845	0.221462	0.192172	0.204066	0.197143	0.239269	0.216044	0.188196	0.19642	0.207946	0.233214	0.158972	0.160558	0.24878	0.231536	0.259815	0.187504	0.15276	0.220152	0.178203	0.194442	0.233317	0.220738	0.182229	0.12094	0.178318	0.172869	0.177282	0.255146	0.206406	0.289804	0.219786	0.20526	0.222761	0.227527	0.175974	0.164932	0.156531	0.186918
Styrene degradation	0.009902	0.00813551	0.00488425	0.00866173	0.0110386	0.00850171	0.00749586	0.00632093	0.00889105	0.00582083	0.009441	0.0286066	0.0181053	0.00455963	0.00960788	0.00571166	0.00209931	0.00845765	0.00849597	0.0197438	0.0121767	0.0119788	0.00593385	0.00803201	0.00712861	0.0148519	0.0083587	0.0124615	0.0105041	0.00478369	0.0124625	0.00602738	0.00950871	0.00787802	0.00379731	0.0119478	0.0211011	0.0105968	0.00911939	0.0124302	0.00448765	0.0060247	0.0160186	0.0151345	0.0135223	0.0149145	0.0206574	0.0266211	0.00721685
Sulfur metabolism	0.218201	0.352132	0.185824	0.224757	0.205222	0.208444	0.282842	0.216784	0.308918	0.438934	0.232516	0.257324	0.222154	0.231965	0.315549	0.254588	0.271834	0.337699	0.302995	0.337647	0.266858	0.42148	0.329948	0.209101	0.183075	0.269963	0.249293	0.418294	0.309023	0.185959	0.24738	0.202613	0.281993	0.32691	0.196099	0.306198	0.405788	0.235459	0.163937	0.207076	0.164018	0.218625	0.247867	0.289446	0.256948	0.260352	0.474027	0.594142	0.259599
Sulfur relay system	0.441157	0.403999	0.421276	0.427737	0.453098	0.447166	0.518102	0.457463	0.469567	0.547064	0.48641	0.439498	0.419331	0.408456	0.46519	0.46669	0.545053	0.487036	0.438502	0.427324	0.471028	0.430872	0.469552	0.450189	0.33493	0.453428	0.462202	0.52141	0.449034	0.424047	0.420976	0.347835	0.460554	0.496719	0.357196	0.413834	0.483315	0.471939	0.366227	0.477493	0.435525	0.431273	0.375337	0.35715	0.492675	0.356653	0.465938	0.482785	0.469394
Synthesis and degradation of ketone bodies	0.0069094	0.0153102	0.00389412	0.0103348	0.0065321	0.00851421	0.01191	0.00988026	0.00998412	0.0058332	0.0053398	0.00722748	0.00667177	0.0132586	0.00896759	0.00607623	0.00374378	0.00719693	0.0107289	0.0115668	0.0081993	0.00773055	0.00968271	0.00670798	0.0327086	0.00941504	0.00863214	0.009395	0.0100479	0.00721976	0.0131317	0.00455862	0.0150985	0.0127487	0.0163563	0.0200477	0.0218611	0.0128954	0.0133769	0.0100404	0.00355279	0.0154403	0.0205787	0.00963622	0.0064857	0.011932	0.0216802	0.0331702	0.00869466
Taurine and hypotaurine metabolism	0.0676491	0.0621651	0.0696774	0.0656205	0.0707528	0.0620091	0.0584036	0.06952	0.0816624	0.0659739	0.0741727	0.0764386	0.0761209	0.0633958	0.063918	0.0727321	0.0639713	0.0715706	0.0741785	0.0802518	0.067199	0.069243	0.0536024	0.078114	0.080117	0.0644643	0.0536888	0.0697257	0.0670163	0.0672685	0.0708541	0.064114	0.0770288	0.0577921	0.0953246	0.0626339	0.0839689	0.0573826	0.0713167	0.0654836	0.0624073	0.0633521	0.0751836	0.0645714	0.0634792	0.071559	0.079226	0.066567	0.0567789
Terpenoid backbone biosynthesis	0.389999	0.307175	0.40205	0.366011	0.347522	0.338004	0.351908	0.363443	0.356577	0.2975	0.356044	0.332492	0.312364	0.367295	0.3435	0.388459	0.354012	0.346041	0.36814	0.329668	0.330251	0.339241	0.415439	0.417534	0.395909	0.455823	0.336901	0.277896	0.353981	0.366956	0.33626	0.421864	0.333272	0.358789	0.427802	0.316009	0.299737	0.367395	0.420451	0.367057	0.526782	0.397241	0.409075	0.325562	0.370828	0.289801	0.299948	0.278964	0.394765
Th17 cell differentiation	0.011695	0.00325054	0.011394	0.0101786	0.00681508	0.00964892	0.00913816	0.00881586	0.0109411	0.00930906	0.00872933	0.00714163	0.0130846	0.00981338	0.00951761	0.010239	0.00985995	0.00969565	0.0110865	0.00801086	0.00883926	0.00958289	0.00862733	0.0123209	0.00573252	0.00915638	0.00997931	0.00984633	0.00990596	0.0121402	0.00615764	0.0115237	0.00667361	0.00876745	0.000757123	0.00488321	0.00842286	0.00809978	0.00936786	0.00832656	0.0104995	0.0105426	0.0083545	0.00922649	0.00858299	0.00433871	0.00887591	0.00620312	0.0142212
Thermogenesis	0.0328646	0.013202	0.0445372	0.0214461	0.0355999	0.0201755	0.0225276	0.0335185	0.024855	0.0222545	0.0324138	0.024535	0.0210007	0.0301867	0.0225622	0.0263501	0.026177	0.0272113	0.0294128	0.0241083	0.0254591	0.0198249	0.0229473	0.0310949	0.0203377	0.0248274	0.017025	0.0232866	0.0235737	0.0252567	0.0276932	0.0311459	0.0283123	0.0314268	0.0396492	0.010825	0.0211464	0.0191656	0.0242116	0.0288149	0.0393095	0.0236288	0.0288475	0.0188578	0.0286478	0.0101347	0.0163185	0.0118806	0.0312245
Thiamine metabolism	0.708602	0.429473	0.60653	0.6267	0.586895	0.572794	0.608025	0.601585	0.572835	0.523492	0.61968	0.569578	0.527666	0.593602	0.547255	0.672607	0.654568	0.572477	0.654854	0.553866	0.620895	0.562597	0.574122	0.750055	0.533617	0.710245	0.620627	0.542785	0.636284	0.612602	0.588082	0.632428	0.553558	0.645078	0.299289	0.522567	0.498384	0.621736	0.645652	0.56588	0.744181	0.668408	0.613699	0.472251	0.690505	0.407585	0.570443	0.470705	0.60537
Thyroid hormone synthesis	0.0414237	0.104111	0.00172585	0.0331564	0.0550591	0.0480102	0.0346329	0.0271359	0.0249015	0.0304167	0.0234692	0.0433361	0.0186004	0.0677667	0.0248805	0.0307498	0.0227888	0.0253927	0.0362139	0.0485968	0.0264998	0.0367002	0.0478984	0.0383089	0.107239	0.0506998	0.0262585	0.0347676	0.0309657	0.0282358	0.040731	0.00891284	0.0499024	0.0365486	0.120894	0.0641946	0.0311802	0.0313996	0.0483788	0.0294479	0.0490731	0.0209074	0.0366728	0.0279085	0.0203567	0.0777222	0.0303582	0.0491236	0.0172589
Tropane, piperidine and pyridine alkaloid biosynthesis	0.0290074	0.0313199	0.0261935	0.0247828	0.0212682	0.0238885	0.0249256	0.0240397	0.0274605	0.0300176	0.0246094	0.0238827	0.0186504	0.0240324	0.0264582	0.026887	0.0255893	0.0268011	0.0332779	0.0288963	0.0256288	0.0342751	0.0275803	0.0273072	0.018378	0.0308094	0.0206809	0.0323683	0.0283466	0.0212131	0.0271688	0.0240159	0.0270724	0.0312919	0.00601775	0.0302185	0.0330329	0.0207793	0.0237998	0.0208201	0.0271205	0.0248748	0.030871	0.0233892	0.0280425	0.0243472	0.0376369	0.0459134	0.0245052
Tryptophan metabolism	0.0265989	0.0461064	0.119404	0.0544233	0.0603387	0.0498596	0.0357207	0.0712117	0.0712407	0.0906324	0.0758492	0.0528704	0.0747359	0.049538	0.0652605	0.0340874	0.0508403	0.0914695	0.0517318	0.0807048	0.0373423	0.0793599	0.0532203	0.0201644	0.0335452	0.0237499	0.025112	0.0709093	0.0393387	0.0740023	0.0413593	0.0998843	0.0679604	0.0361152	0.0296797	0.0327546	0.0533015	0.022958	0.0318294	0.0772965	0.0160994	0.0249375	0.0492351	0.079912	0.0541865	0.0559171	0.0486225	0.0814047	0.0465379
Tuberculosis	0.14981	0.126427	0.132594	0.144168	0.14178	0.154812	0.12859	0.123482	0.130897	0.103591	0.135817	0.13053	0.110183	0.150037	0.116151	0.166154	0.141224	0.121611	0.136306	0.112879	0.138735	0.113045	0.147732	0.155869	0.147704	0.144183	0.14254	0.122167	0.129282	0.138909	0.145694	0.128204	0.11672	0.134202	0.167256	0.141951	0.105877	0.159608	0.148205	0.142157	0.146468	0.162502	0.130913	0.140993	0.141017	0.141301	0.122855	0.108395	0.156089
Two-component system	2.59011	3.66694	2.13289	2.36298	2.40837	2.86479	2.99556	2.42475	3.17953	4.02428	2.33633	2.75202	3.76297	2.43989	3.22484	2.49741	2.49813	3.17004	2.75517	2.95994	2.69067	3.53445	3.25894	2.45	2.61459	2.42264	3.18937	3.81406	3.04502	2.66593	2.64467	2.54126	2.74837	3.21109	2.83342	2.91664	3.59137	2.86012	2.48639	2.35152	2.18986	2.51243	2.5418	3.30215	2.37325	3.26661	3.87974	4.23548	2.73283
Type I diabetes mellitus	0.0325045	0.0317087	0.0394084	0.0325807	0.0338388	0.0357405	0.0314863	0.0349436	0.0303524	0.0311546	0.0337227	0.0349379	0.0258348	0.0346924	0.0333398	0.0310692	0.0291202	0.0340011	0.0284017	0.0297859	0.0317946	0.0295562	0.0296728	0.0331927	0.0320954	0.0324507	0.0284222	0.0324101	0.0298236	0.0376362	0.0348662	0.0345624	0.0308664	0.0238696	0.0357819	0.0241616	0.0242782	0.0314529	0.0326912	0.0408281	0.0360346	0.0321452	0.035966	0.0308251	0.0346934	0.029864	0.0248906	0.0257862	0.0322461
Type II diabetes mellitus	0.0131178	0.0094669	0.0110984	0.0115141	0.0103332	0.0102587	0.0110468	0.0106291	0.0118278	0.010473	0.00985864	0.0136592	0.0110326	0.0119855	0.0107965	0.0124585	0.0124392	0.0108566	0.011585	0.0105837	0.0114737	0.0126833	0.0115075	0.01173	0.0112937	0.0128661	0.011539	0.00981773	0.0115108	0.0105137	0.0106176	0.0122108	0.0108442	0.0117811	0.010937	0.0115234	0.00932864	0.0111439	0.0120153	0.0114061	0.0145284	0.0132161	0.0117796	0.00976252	0.0127934	0.0106477	0.0105412	0.0105969	0.0112446
Tyrosine metabolism	0.0377845	0.0994806	0.037431	0.0363046	0.0533146	0.0460425	0.0540555	0.0524629	0.0490621	0.102655	0.0355562	0.060212	0.0459392	0.0434709	0.0557075	0.0450557	0.0358867	0.0353621	0.0628496	0.0729271	0.0527027	0.0682834	0.0517914	0.0398042	0.0548445	0.0863299	0.041632	0.0565839	0.0585065	0.0358209	0.0586248	0.0397722	0.0472259	0.0712104	0.0533739	0.0852926	0.0986958	0.0559623	0.045962	0.0474842	0.0352912	0.04471	0.0769999	0.0561619	0.0426689	0.0453429	0.108322	0.164727	0.0459849
Ubiquinone and other terpenoid-quinone biosynthesis	0.146416	0.174157	0.184688	0.0900749	0.0981653	0.0792677	0.132637	0.14629	0.158529	0.209127	0.118093	0.11099	0.103264	0.140877	0.17866	0.107172	0.11114	0.163465	0.173344	0.179589	0.111357	0.241833	0.189595	0.12832	0.15322	0.228353	0.0516207	0.184461	0.120607	0.125132	0.129201	0.22198	0.181573	0.136926	0.166789	0.116312	0.174594	0.0693945	0.11508	0.137647	0.188728	0.121877	0.198772	0.15179	0.125791	0.13788	0.173339	0.242027	0.122029
Valine, leucine and isoleucine biosynthesis	0.202933	0.214876	0.201995	0.22675	0.186209	0.208609	0.209544	0.1658	0.185599	0.181337	0.197864	0.212887	0.172985	0.222327	0.162542	0.21276	0.203393	0.191137	0.181629	0.214942	0.218479	0.182696	0.17421	0.214339	0.162693	0.189659	0.205146	0.190066	0.213701	0.197055	0.221533	0.221486	0.185456	0.194684	0.209691	0.215639	0.189418	0.184377	0.17592	0.183448	0.176522	0.201287	0.173181	0.217549	0.244057	0.226404	0.178298	0.16838	0.18094
Valine, leucine and isoleucine degradation	0.0631731	0.0693915	0.0723464	0.0672817	0.0763628	0.0667557	0.0697605	0.0734576	0.0653046	0.0605827	0.0684804	0.0669677	0.0714155	0.0837394	0.0678201	0.0571819	0.0576699	0.0689288	0.0700471	0.0828381	0.0763954	0.0750328	0.0526177	0.0518421	0.103425	0.0584237	0.0528977	0.0744812	0.0496148	0.0644279	0.069603	0.0763068	0.0838852	0.0536423	0.0702977	0.0657286	0.0873133	0.0612146	0.0615002	0.0710042	0.0428023	0.0681827	0.0829077	0.0732719	0.0868095	0.0542938	0.075763	0.0937441	0.0626996
Vancomycin resistance	0.243167	0.235244	0.280861	0.324157	0.250368	0.303462	0.258317	0.272389	0.291694	0.240596	0.294961	0.252676	0.361282	0.290539	0.243861	0.275595	0.273269	0.25452	0.262173	0.226692	0.262062	0.231182	0.256807	0.26769	0.29174	0.2706	0.31849	0.235229	0.28392	0.31959	0.282499	0.293425	0.212031	0.257822	0.279807	0.236135	0.270495	0.315242	0.316823	0.298173	0.234943	0.277872	0.250968	0.32351	0.26467	0.245459	0.266984	0.233764	0.348381
Various types of N-glycan biosynthesis	0.0337116	0.00642638	0.0740331	0.0343815	0.0526146	0.0426586	0.0430213	0.0620707	0.0258306	0.0289962	0.0468061	0.0482212	0.0525664	0.036883	0.0291146	0.028217	0.046275	0.0421166	0.0518515	0.0397985	0.0329956	0.0397098	0.0265775	0.0277706	0.0252957	0.0344211	0.0260396	0.0272109	0.0120177	0.0435326	0.016802	0.0614986	0.0585321	0.0269621	0.0125793	0.00883877	0.0368733	0.029574	0.0275629	0.0450686	0.0374133	0.0173167	0.0384151	0.0314908	0.0645856	0.0036755	0.0145974	0.0201761	0.0368812
Viral carcinogenesis	0.0126586	0.00937068	0.0105029	0.0107611	0.00950263	0.0098609	0.0107981	0.00982692	0.0123315	0.0101157	0.00963609	0.0115655	0.0100277	0.0116791	0.00996142	0.0118441	0.0117815	0.0112047	0.0111366	0.00903544	0.0103598	0.011463	0.0114857	0.010945	0.0107947	0.0119152	0.0110132	0.00953599	0.0113115	0.0103225	0.0103189	0.0144118	0.00948269	0.0117439	0.0147036	0.011101	0.0087592	0.0109729	0.011559	0.0110046	0.0141035	0.0130371	0.0109159	0.00976252	0.0115878	0.0104883	0.0103221	0.0101799	0.0116071
Vitamin B6 metabolism	0.272583	0.347478	0.267663	0.29638	0.312027	0.358285	0.268301	0.228828	0.256773	0.236687	0.266244	0.273548	0.204871	0.272024	0.230863	0.287784	0.250157	0.236696	0.252228	0.223953	0.284222	0.25715	0.247871	0.342951	0.193971	0.281325	0.239571	0.247787	0.287974	0.273951	0.294536	0.268087	0.261685	0.229489	0.369279	0.194804	0.210527	0.248496	0.281052	0.298662	0.33234	0.255513	0.301497	0.201958	0.30486	0.332903	0.221823	0.243173	0.260001
Xylene degradation	0.00864741	0.0188964	0.00443455	0.0130435	0.0205123	0.00816089	0.0225692	0.0124481	0.00677585	0.0184174	0.0117779	0.0153434	0.00928456	0.0114695	0.0104797	0.0113469	0.00790799	0.00748398	0.0185846	0.0172566	0.0193315	0.00919236	0.0181455	0.00840247	0.0221081	0.0161161	0.0119858	0.0241737	0.014737	0.0127244	0.0170037	0.00613676	0.0124457	0.00470075	0.0283103	0.0310826	0.0163484	0.016669	0.00814203	0.0193329	0.00291237	0.0154862	0.0122378	0.0102388	0.00531621	0.0358813	0.0224257	0.0328634	0.0107198
Zeatin biosynthesis	0.0517522	0.0425687	0.0701329	0.0467398	0.055171	0.042485	0.0509234	0.0587119	0.0480293	0.0363166	0.065342	0.0484222	0.0339142	0.0430421	0.045576	0.0523884	0.0497444	0.0413164	0.0474147	0.0400241	0.0569129	0.045295	0.0532543	0.0652652	0.0498854	0.0639087	0.0358738	0.0311938	0.047277	0.0412396	0.0399831	0.0475047	0.0456562	0.0433375	0.0479059	0.0436313	0.0381619	0.0482374	0.0539569	0.0517843	0.0727293	0.0495135	0.0574609	0.0296889	0.062936	0.0364881	0.0347942	0.0358569	0.0543686
[truncated: 532 more columns]
