# Supplementary material for: Metabolic and functional pathways of gut microbiota in patients with gastric cancer: The DELIVER trial (JACCRO GC-08)
Source: Research Square preprint supplement (doi:10.21203/rs.3.rs-7899663/v1), 2025-11-28
Supplement: Supplementary file 2 [file 2f13dd4199044470647d2dd8.xlsx]

## Sheet: Genus_Fig_Cluster
CASEID	GC08-296	GC08-343	H_DRR042504	H_DRR042290	GC08-290	H_DRR042388	H_DRR042296	H_DRR042374	H_DRR042412	H_DRR042619	H_DRR042382	H_DRR042456	GC08-263	H_DRR042384	H_DRR042637	H_DRR042342	H_DRR042368	H_DRR042372	GC08-317	GC08-410	GC08-124	GC08-494	GC08-327	GC08-205	GC08-073	GC08-378	GC08-245	GC08-285	GC08-470	GC08-374	GC08-061	GC08-381	GC08-074	GC08-162	GC08-295	GC08-120	GC08-479	GC08-225	GC08-500	GC08-195	GC08-430	GC08-241	GC08-337	GC08-217	GC08-149	GC08-382	GC08-265	GC08-207	GC08-099
Bacteroides	1	4.60293	1.5143	1.64844	2.86179	38.9462	26.9881	32.8933	33.3428	29.9972	16.316	12.0498	15.6322	21.3815	20.8294	25.7334	19.1837	18.5403	8.98671	0.880389	0.48226	20.6132	6.98623	2.77735	1	8.50345	0.187668	3.8873	4.06857	1	0.0105798	21.3092	2.69696	8.9483	25.0355	7.93321	1.30211	9.67098	3.67609	0.152539	0.111644	1.21711	6.53604	0.00665557	1	1.58403	0.00868659	0.0169233	1
Streptococcus	0.117647	0.252908	6.92653	13.709	1.9187	1.63135	0.657483	0.958058	0.751347	0.517193	0.783828	12.1277	8.82445	10.6632	10.5163	16.2755	3.14278	0.376223	0.0664452	0.455373	0.53393	17.7594	22.2052	8.9365	17.2379	28.0952	13.8338	5.60835	12.5921	0.234821	12.2091	5.63963	12.444	8.65452	0.639305	17.4281	34.4787	31.071	21.3456	25.7137	21.9085	26.7184	21.8249	27.6007	31.8504	29.9124	36.8485	25.2722	25.8485
Bifidobacterium	0.117647	1	31.1554	42.4727	53.2358	42.9589	43.5191	31.1263	28.6362	18.6888	23.5767	21.5106	20.5361	30.4507	22.7772	19.6982	35.182	28.2017	0.13289	0.0303582	20.0482	2.95624	9.60394	13.3053	12.1766	18.2553	21.8767	11.6553	3.94785	5.33378	0.592467	1.09097	5.42189	4.9765	0.0631413	10.3339	1.51008	5.59609	9.51101	5.65846	9.273	4.24829	8.24514	0.386023	0.0563126	1.32746	4.22168	6.3801	5.07576
Lactobacillus	0.470588	1	0.0560853	0.0504626	4.58537	0.0375023	0.0469631	0.0851607	0.198469	0.125804	0.206271	0.778665	7.41529	0.0916086	0.131453	0.167645	0.0853242	0.165538	6.49502	23.7098	15.484	19.0692	16.3465	17.7506	20.926	23.1605	27.6408	27.6364	30.798	40.5904	35.6433	30.2569	6.52977	6.07521	0.0315706	0.0498422	0.623926	8.47329	15.6147	4.96114	7.29625	8.89069	0.0286041	8.38602	19.2814	13.5869	4.69076	9.97913	3.13636
Klebsiella	1	0.0505817	0.0280426	0.0841043	8.55285	0.0187512	1	1	0.283527	0.0419346	0.0206271	2.19973	0.0187888	0.0549652	0.0239006	1	0.0284414	0.0150489	1	1	1	0.0219523	0.0226642	0.00765111	1	2.40858	0.348525	0.0465147	1.38839	1	0.0423191	0.052789	2.56267	0.287897	0.157853	0.44858	1	0.117015	0.19074	0.101692	0.321797	0.0115915	0.0143021	0.0133111	1	4.94172	0.277971	4.10673	0.030303
Veillonella	1	1	1	0.689655	2.4065	0.412526	1	1	0.0567054	0.0139782	1	0.0389332	6.22534	0.10993	0.0239006	0.433082	0.213311	0.0300978	1	0.485732	0.0172236	1.33177	0.21531	4.42999	0.136178	1.55676	0.509383	1.66789	1.67814	0.0335458	1.12146	1.66285	2.9991	1.71563	0.00789266	9.00482	8.68975	11.1096	10.5601	9.78427	6.60669	10.386	4.90561	4.99168	9.32537	4.26683	15.5316	10.9607	15.7576
Anaerostipes	1	1	0.729108	4.92851	0.943089	0.768798	2.09768	1.34128	12.9005	7.53425	7.11634	4.01012	4.08969	3.84756	8.79541	13.3277	9.35722	19.5786	0.215947	0.151791	1.63624	10.9322	4.86147	2.3795	1	0.0293729	1	0.292378	0.350115	1	0.0211595	0.0439908	0.111907	1.52174	0.023678	0.498422	0.388824	0.0894824	0.416161	0.0653737	0.0262691	0.0753448	0.235984	0.0599002	1	0.00557756	1	0.0112822	0.0151515
Roseburia	1	1	1.57039	1.39613	2.92683	1.14382	1.42455	3.49159	2.38163	1.67738	4.37294	2.18026	2.43627	3.00476	2.55736	1.94188	2.11889	1.50489	0.747508	0.485732	27.1788	1.09761	2.06811	1.42311	1	0.0146864	1	0.677786	0.953761	1	0.359712	0.0175963	0.604297	0.898942	0.323599	0.938694	1.23881	0.027533	2.19351	0.0726375	0.137913	0.399907	0.479119	0.0199667	1	0.00557756	1	0.0112822	0.136364
Citrobacter	1	0.0505817	0.0280426	0.117746	1	1	0.0626174	0.0212902	1	0.0279564	0.0412541	0.0194666	0.0187888	0.146574	0.143403	0.0139704	0.0284414	0.0150489	0.0166113	1	0.0344471	0.00731743	0.0113321	1	1	1	0.0536193	0.0398698	0.820959	1	1	23.9398	14.3577	28.302	23.1255	0.00830703	1	0.0137665	0.0346801	0.0217912	0.183884	0.0173873	0.0214531	1	1	1	1	1.9349	1
Enterobacter	1	1	0.0841279	14.1463	0.097561	0.112507	0.0313087	0.0425804	0.0141764	0.0279564	0.0618812	0.0583998	0.0626292	0.0183217	0.0597514	0.0139704	1	0.0300978	0.564784	1	0.0344471	0.0219523	0.0453283	0.00765111	1	0.425907	1	0.0199349	0.748521	1	0.0423191	0.131973	0.2406	0.217391	0.0710339	0.00830703	0.0180848	0.00688326	0.0260101	0.0145275	0.0262691	0.0115915	0.0286041	0.00665557	1	0.0223102	2.1369	3.7739	1
Blautia	1	0.151745	1.76669	1.76619	2.99187	1.66885	1.31497	1.70321	2.36745	4.52893	2.76403	2.95893	1.47179	2.60169	2.56931	2.17938	2.73038	2.31753	0.315615	1.3054	4.237	1.11225	1.46184	1.67559	0.0113482	0.0440593	1	6.54528	5.33623	1	0.761744	1	0.414056	1.19271	0.149961	0.573185	8.77114	0.0137665	0.554881	0.268759	0.348066	0.197056	0.69365	0.0199667	1	0.0669307	1	0.0451289	0.181818
Ruminococcus	1	1	0.420639	0.151388	0.0325203	0.243765	0.7201	1.59676	0.255174	0.293542	2.00083	0.233599	0.313146	0.641261	0.537763	2.97569	0.327076	0.180587	0.149502	0.0910747	0.361695	0.0804917	0.27197	0.0612089	1	1	1	0.0199349	0.156948	1	0.518409	0.0263945	0.0391674	0.111633	0.00789266	0.0747633	0.162763	1	0.11271	1	1	0.0521618	0.0572082	1	1	1	1	1	1
Fusobacterium	1	22.1042	1	0.0168209	0.0325203	1	0.0156544	0.0212902	0.0141764	0.0139782	0.0206271	1	0.0125258	1	0.0239006	0.0139704	1	0.0300978	1	3.03582	1	0.0439046	1	0.00765111	1	0.0146864	1	0.00664496	0.0482917	1	0.0846382	1	6.56334	0.276146	3.78848	2.86592	0.0904241	0.0137665	0.10404	0.0217912	0.794641	1.65759	2.97483	0.605657	1	0.0613531	0.0347464	2.69081	0.378788
Acidaminococcus	1	1	0.308469	0.0672834	0.097561	0.168761	1	0.0638706	0.0283527	1.13223	0.288779	10.7456	0.532348	0.0916086	0.0956023	0.0279408	0.0568828	0.0150489	0.0332226	1	0.0688942	0.373189	0.220976	0.0153022	1	1	1	0.285733	0.0241458	1	0.391452	1	0.117502	1	0.023678	0.141219	0.00904241	0.385463	0.0520201	0.0145275	0.00656728	0.0173873	0.0214531	1	0.0112625	1	1	0.00564111	3.12121
Akkermansia	1	1.31512	0.0841279	1	1	1	0.0156544	1	1	0.0139782	0.0412541	1	0.00626292	0.0183217	0.0358509	0.0279408	1	0.0150489	0.0332226	1	0.0172236	0.0146349	0.0169981	0.00765111	1	1	1	0.00664496	2.90957	1	0.0105798	0.325532	1	1	6.21942	0.0166141	1	1	1	1	1	1	1.94508	1	1	0.00557756	1	0.00564111	1
Gordonibacter	1	0.202327	0.616938	0.403701	0.097561	0.0187512	0.375704	0.489674	0.226822	0.111826	0.123762	0.0973331	0.582451	0.0549652	0.119503	0.167645	0.298635	0.346125	0.182724	8.80388	0.206683	0.139031	0.24364	0.0229533	1	0.0146864	0.294906	0.245864	0.132802	1	1	0.0263945	0.710609	0.0881316	0.0789266	0.0581492	0.0271272	0.0206498	0.0867002	1	0.045971	0.0173873	0.0715103	0.046589	0.0112625	0.591221	0.00868659	1	1
Adlercreutzia	1	1	12.1144	0.0504626	1	0.0375023	0.0626174	0.212902	0.127587	6.9891	0.330033	1	0.30062	1	0.191205	0.279408	0.0568828	0.0451467	0.0332226	0.273224	0.0688942	0.00731743	0.0849907	1	1	1	0.0536193	0.0930294	0.0362188	0.0335458	1	1	0.0335721	0.0822562	1	0.00830703	0.0361696	0.0137665	0.00867002	1	1	0.00579576	0.00715103	1	0.0112625	0.0557756	1	1	1
Intestinimonas	1	1	0.785193	0.117746	0.130081	0.300019	0.438322	0.638706	0.31188	0.447302	0.866337	0.1752	0.544874	0.677904	0.501912	0.586756	0.39818	0.150489	3.13953	0.182149	1.1712	0.131714	0.390957	0.130069	1	0.0146864	1	0.0730946	0.325969	0.0335458	0.0846382	0.0967799	0.0503581	0.246769	0.0947119	0.0664562	0.162763	1	0.16473	0.00726375	1	0.185464	0.500572	0.00665557	1	1	1	1	0.0151515
Clostridioides	1	0.505817	0.701066	0.639193	1.23577	0.8063	0.688792	0.958058	0.481996	0.922561	0.866337	1.168	0.588714	0.934408	0.645315	0.71249	1.09499	0.541761	0.299003	0.576806	0.809507	0.175618	0.521276	0.696251	1	1.20429	0.0268097	0.372118	0.627792	1	0.751164	0.0351927	14.7717	0.417156	0.149961	0.523343	0.506375	1	0.468181	0.0217912	0.341499	0.695491	0.379005	2.34942	0.0450501	0.0167327	1	0.214362	0.257576
Olsenella	0.352941	1	1.82277	0.58873	0.292683	0.0750047	0.798372	1.04322	0.666289	0.0838692	0.660066	0.311466	1.88514	0.201539	0.334608	0.447052	0.426621	0.496614	0.0664452	0.0303582	0.637272	0.153666	0.84424	0.13772	0.068089	1	0.0268097	8.61187	0.313896	1	0.0105798	0.0351927	0.0223814	0.487662	0.023678	0.506729	1	0.0688326	0.658921	1	0.0394037	1.49531	0.0143021	0.00665557	0.653227	1.37766	1	1	1
Faecalitalea	1	1	0.392597	0.151388	0.422764	0.243765	0.344396	0.851607	0.779699	0.629019	0.84571	0.564532	0.594977	0.971052	0.40631	0.656608	0.568828	0.466516	4.66777	0.273224	0.912849	0.168301	0.481614	0.405509	0.0113482	1	1	0.0797395	0.543281	1	0.0634786	0.052789	0.0559534	0.470035	0.102605	0.149526	0.117551	0.0137665	0.242761	0.00726375	0.0197018	0.237626	0.100114	0.0133111	1	0.00557756	1	0.00564111	0.0151515
Campylobacter	1	1	0.140213	0.100925	0.097561	0.0562535	0.140889	0.170321	0.113411	0.167738	0.185644	0.0973331	0.144047	0.274826	0.119503	0.111763	0.113766	0.150489	0.0830565	0.0910747	0.120565	0.0365872	0.0339963	0.657995	1	0.0293729	0.107239	0.00664496	0.108656	1	0.0211595	2.11156	0.391674	0.0587544	0.023678	0.0332281	0.117551	1	0.11271	0.268759	1.00479	1.07801	0.0572082	0.00665557	0.112625	0.00557756	2.50174	0.124104	1
Finegoldia	1	1	0.0280426	0.0336417	0.0325203	0.0375023	0.0156544	0.149031	0.0850581	0.0139782	0.0618812	0.0194666	0.0125258	0.0916086	0.0717017	0.0698519	0.0995449	0.0300978	1	1	1	0.051222	0.0283302	0.00765111	1	1	1	0.00664496	0.0241458	1	1	1	0.00559534	0.0176263	0.528808	1	0.00904241	1	0.0260101	1	0.00656728	0.0115915	0.00715103	1	1	1	1	0.00564111	1
Turicibacter	1	1	0.0560853	0.0168209	0.0650407	1	0.0313087	0.0212902	0.0283527	0.0279564	0.0412541	1.03173	0.0501033	1	0.0239006	0.0139704	0.0284414	0.0300978	0.0332226	1	0.0344471	0.0146349	0.00566604	0.00765111	1	0.0146864	1	0.00664496	0.0362188	1	1	1	0.0111907	0.0176263	0.00789266	0.00830703	1	1	1	1	1	0.0463661	0.0286041	0.0665557	1	0.00557756	1	0.00564111	1
Mogibacterium	1	1	1	1	0.0325203	0.0187512	1	1	1	0.0139782	1	0.0194666	0.00626292	0.0366435	0.0239006	1	1	1	1	1	0.0172236	0.0219523	0.0339963	0.00765111	0.0453926	1	1	0.0132899	0.0120729	1	1	1	0.016786	0.170388	0.0710339	0.00830703	1.92603	0.0206498	1	0.05811	0.105077	0.0115915	0.00715103	1	0.0112625	1	1.69388	0.0112822	1
Cupriavidus	1	1	0.0280426	1	0.097561	0.0187512	0.0156544	0.0212902	1	1	1	0.0194666	0.0438404	1	0.0597514	0.0139704	0.0142207	0.0300978	1	0.0303582	0.0172236	0.00731743	0.0226642	0.00765111	1	1	1	0.0199349	0.0120729	1	1	1	0.0111907	0.0117509	1	0.0249211	0.0180848	0.0137665	0.00867002	0.00726375	1	1	0.00715103	0.0199667	0.0337876	0.0167327	1	0.00564111	1
Dickeya	1	1	0.0841279	0.0504626	1	0.0187512	0.0156544	0.0212902	0.0141764	1	1	0.0194666	0.0187888	0.0549652	0.0478012	0.0279408	0.0142207	1	1	1	1	0.00731743	1	0.00765111	1	1	1	0.00664496	0.0241458	1	1	1	0.00559534	0.0235018	0.023678	0.00830703	0.00904241	0.00688326	0.00867002	1	0.0131346	1	0.0214531	0.00665557	1	1	0.0173732	0.00564111	1
Ralstonia	1	1	1	0.0336417	0.0325203	1	0.0469631	0.0212902	0.0141764	0.0139782	0.0206271	0.0389332	0.0375775	0.0366435	0.0358509	0.0558815	1	1	1	1	0.0172236	0.0146349	0.0396623	1	1	1	1	0.0199349	1	1	1	1	1	0.0117509	1	0.0166141	0.00904241	0.00688326	0.00867002	1	0.00656728	0.00579576	0.00715103	0.0199667	1	1	1	1	1
Phoenicibacter	1	1	1	1	1	0.0750047	1	0.0425804	0.0141764	1	0.0412541	0.0194666	0.0876808	0.0183217	0.0239006	0.0558815	0.0426621	0.0601956	1	1	0.0172236	0.0146349	0.0396623	0.00765111	1	1	1	0.00664496	0.0120729	1	1	1	0.0223814	0.00587544	1	0.0249211	0.00904241	0.00688326	1	1	0.0131346	1	1	1	1	1	1	1	1
Pantoea	1	1	0.0280426	0.0168209	1	1	0.0782718	0.0638706	0.0567054	0.0419346	0.0206271	0.0389332	0.0438404	0.0366435	0.0597514	0.0139704	0.0284414	0.0300978	1	1	0.0516707	0.0146349	0.0226642	1	1	1	1	0.0199349	1	1	1	0.00879817	0.00559534	0.0117509	1	1	1	1	0.00867002	0.0145275	1	1	1	0.00665557	1	1	1	0.0282056	0.0151515
Denitrobacterium	1	1	0.0280426	0.0168209	0.0325203	1	0.0313087	0.0212902	0.0141764	0.0139782	0.0206271	0.0194666	0.100207	0.0183217	0.0239006	1	0.0284414	0.0150489	1	0.121433	0.0172236	0.0219523	0.0396623	0.0229533	1	1	1	0.0398698	0.0120729	1	1	1	0.00559534	0.0117509	1	0.0166141	1	0.00688326	0.00867002	0.00726375	1	1	1	1	1	0.0334653	1	1	1
Coriobacterium	1	1	0.280426	0.100925	0.130081	1	0.10958	0.234192	0.0992345	1	0.0618812	0.0194666	0.0876808	0.0183217	0.0239006	0.0977927	0.0853242	0.13544	1	1	0.172236	0.0439046	0.0566604	0.0153022	1	1	1	0.0730946	0.0362188	1	1	1	1	0.0470035	1	0.0332281	1	0.0344163	0.0433501	1	1	1	1	1	1	0.0111551	1	1	1
Halomonas	1	1	0.0841279	1	1	1	0.0156544	0.0851607	0.0567054	1	0.0412541	0.0389332	0.0125258	0.0916086	0.083652	0.0139704	0.0284414	1	1	1	0.0172236	0.0292697	0.0339963	0.0153022	1	1	1	0.00664496	1	1	1	1	1	1	1	0.0166141	1	0.00688326	1	1	0.00656728	1	1	0.00665557	1	0.0111551	1	1	1
Rhizobium	1	1	0.0841279	1	1	1	0.0469631	0.0212902	0.0283527	1	0.0206271	0.0389332	0.0250517	1	0.0956023	0.0279408	0.0142207	1	0.0166113	1	0.0172236	1	0.0339963	1	1	0.0146864	1	0.0332248	0.0482917	1	1	0.0175963	0.0111907	0.0176263	0.023678	0.00830703	0.0180848	1	0.01734	1	1	1	0.0143021	1	1	0.0111551	1	1	1
Ethanoligenens	1	1	0.0280426	1	1	0.0187512	0.0782718	0.170321	0.0708818	0.0978474	0.0412541	0.0389332	0.0688921	0.0732869	0.0717017	0.0977927	0.0995449	0.0601956	0.0498339	1	0.0344471	0.00731743	0.0509944	1	1	1	1	0.00664496	0.0724375	1	1	1	0.0111907	0.00587544	1	0.00830703	0.00904241	1	0.01734	1	1	0.0173873	0.0214531	1	1	1	1	1	1
Deinococcus	1	1	0.0841279	1	1	0.0375023	0.0313087	0.0851607	0.0567054	0.0139782	0.0618812	1	0.0313146	1	0.0358509	0.0139704	0.0426621	0.0150489	0.0332226	1	0.0688942	0.0292697	0.0509944	0.00765111	1	1	1	0.0132899	0.0120729	1	1	0.00879817	0.00559534	1	0.0157853	0.00830703	1	1	0.0260101	1	0.00656728	0.0115915	0.00715103	1	0.0112625	0.00557756	1	1	0.0151515
Geobacter	0.117647	1	0.0560853	1	0.0325203	1	0.0313087	0.0425804	1	0.069891	0.0412541	0.0389332	0.0438404	0.0549652	0.0119503	1	0.0142207	0.0150489	1	0.0303582	0.0344471	0.0146349	0.0169981	0.0153022	0.0113482	1	1	0.0132899	0.0120729	1	1	0.0175963	0.016786	0.0117509	0.0157853	0.00830703	1	1	0.0260101	0.00726375	0.0131346	0.00579576	0.0286041	1	1	0.00557756	0.00868659	1	1
Mycobacterium	0.588235	1	0.0280426	0.0168209	1	1	0.0313087	0.0212902	1	0.0139782	0.103135	0.0389332	0.0313146	0.0549652	0.0358509	0.0139704	0.0284414	0.0300978	1	1	0.0861178	0.0365872	0.0283302	0.0229533	0.0340445	0.0293729	1	0.0332248	0.0120729	0.0335458	0.0211595	0.0175963	0.016786	0.0352526	0.0157853	0.0249211	1	0.0137665	0.00867002	0.0217912	0.105077	0.00579576	0.00715103	0.113145	0.0225251	0.0836633	0.0347464	1	1
Streptomyces	0.352941	1	0.168256	0.0168209	1	1	0.0469631	0.0638706	0.127587	0.0419346	0.0825083	0.0583998	0.0688921	0.0732869	0.0597514	0.0977927	0.0284414	0.0150489	0.0166113	0.0303582	0.0861178	0.0292697	0.0963227	1	0.102133	0.0146864	1	0.0199349	0.0120729	0.100637	0.0211595	1	0.0111907	0.0352526	0.023678	0.0249211	0.00904241	1	0.00867002	0.029055	0.203586	0.0115915	0.0214531	0.126456	0.191463	0.145016	0.0694927	0.0112822	0.030303
Burkholderia	0.117647	1	0.0280426	0.0336417	0.0325203	1	0.0156544	0.106451	0.0141764	0.0838692	0.0618812	0.0973331	0.0814179	0.0366435	0.131453	0.0279408	0.0426621	1	0.0498339	0.0303582	0.0344471	0.00731743	0.0453283	1	0.0226963	1	1	0.0398698	0.0241458	1	1	0.00879817	1	0.0117509	0.023678	0.0249211	0.0180848	0.027533	1	0.0145275	0.00656728	0.0115915	0.0214531	0.0199667	0.0675752	0.00557756	1	1	1
Treponema	1	1	0.112171	0.0672834	0.0325203	0.0187512	0.0313087	0.0425804	0.0708818	0.0419346	0.0825083	0.0778665	0.0501033	0.183217	0.0478012	0.0419111	0.0995449	1	0.0166113	1	0.0516707	0.0146349	0.0169981	0.0153022	1	1	1	0.0132899	0.0482917	1	1	0.0263945	0.00559534	0.0411281	0.023678	0.0166141	0.0180848	1	1	0.00726375	0.0131346	0.00579576	0.00715103	0.00665557	1	1	0.00868659	1	1
Ruminiclostridium	1	1	0.112171	0.0336417	0.0325203	0.0375023	0.0469631	0.127741	0.0425291	0.0559128	0.185644	0.0778665	0.0438404	0.146574	0.0119503	0.0558815	0.0284414	0.0150489	0.0166113	1	0.0688942	0.0146349	0.0396623	0.0306044	1	1	1	0.0132899	0.0241458	1	0.0211595	0.00879817	1	0.0176263	1	0.00830703	1	1	0.01734	1	0.00656728	0.0173873	0.0143021	1	1	1	1	0.00564111	1
Christensenella	1	1	0.280426	0.0168209	0.130081	0.168761	0.172198	0.106451	0.0708818	0.139782	0.103135	0.0583998	0.162836	0.128252	0.0717017	0.0838223	0.184869	0.13544	0.332226	0.0607165	0.24113	0.0292697	0.107655	0.0229533	1	1	1	0.0863845	0.386333	1	0.0105798	0.0439908	0.0503581	0.052879	0.0157853	0.0498422	0.045212	1	0.01734	1	1	0.144894	0.164474	1	1	1	1	1	1
Butyrivibrio	1	1	0.140213	0.117746	0.195122	0.0562535	0.203507	0.149031	0.15594	0.139782	0.453795	0.194666	0.175362	0.256504	0.454111	0.181615	0.213311	0.180587	0.0498339	0.0910747	0.258353	0.139031	0.260638	0.122418	1	1	1	0.0598046	0.0603646	1	0.0211595	1	0.0223814	0.105758	0.0394633	0.0581492	0.0904241	1	0.0780302	0.0217912	0.0197018	0.0115915	0.0143021	1	1	1	1	1	1
Paenibacillus	1	1	0.224341	0.134567	0.0325203	0.112507	0.234815	0.298063	0.269351	0.209673	0.330033	0.311466	0.269305	0.274826	0.310707	0.251467	0.227531	0.150489	0.0830565	0.121433	0.189459	0.197571	0.186979	0.0841622	1	0.0293729	1	0.0797395	0.144875	0.0335458	0.0528989	0.0351927	0.0559534	0.105758	0.0631413	0.0747633	0.0904241	0.00688326	0.0867002	0.0145275	0.0131346	0.0637533	0.0929634	0.0133111	0.0225251	1	1	1	0.0151515
Pseudomonas	0.235294	1	0.476725	0.0504626	0.162602	0.0375023	0.156544	0.383223	0.15594	0.15376	0.371287	0.311466	0.200413	0.311469	0.250956	0.251467	0.113766	0.0601956	0.0498339	1	0.258353	0.0878092	0.147317	0.0306044	0.0113482	0.0146864	1	0.126254	0.0845104	1	0.0317393	0.052789	0.0615488	0.0763807	0.0631413	0.0415351	0.0542545	0.0137665	0.0693601	0.0145275	0.0197018	0.023183	0.0643593	0.0332779	0.0337876	0.0390429	0.00868659	0.0112822	0.0606061
Tannerella	1	0.0505817	0.0560853	1	0.0650407	1	0.0313087	0.0851607	0.0567054	0.0559128	0.103135	0.0194666	0.0375775	0.0732869	0.0478012	0.0279408	1	0.0150489	0.0830565	1	1	0.0439046	0.0396623	0.0459067	1	0.0440593	1	0.00664496	0.0120729	1	1	0.00879817	0.0335721	1	1	0.0664562	0.0361696	1	1	0.101692	1	1	0.0286041	0.00665557	0.0225251	1	1	0.0169233	1
Chryseobacterium	1	1	0.0280426	1	0.130081	0.0187512	0.140889	0.0212902	0.0283527	0.0838692	0.0412541	0.0194666	0.10647	0.0366435	0.0597514	1	1	1	0.0332226	0.0303582	1	0.0219523	0.0509944	0.0229533	1	0.0146864	1	0.0199349	0.0362188	1	0.0105798	0.0175963	0.00559534	0.0235018	1	0.00830703	0.00904241	1	1	0.00726375	0.0131346	1	0.0357551	1	1	0.0111551	1	0.0112822	1
Serratia	1	1	0.0280426	0.0168209	0.0650407	0.0187512	0.0156544	0.0638706	0.0425291	0.0419346	0.0825083	1	0.0125258	0.0916086	0.083652	0.0419111	0.0284414	0.0150489	1	1	1	0.0292697	0.0226642	1	1	1	1	0.0265798	0.144875	1	0.0105798	1	0.0447628	0.0117509	1	0.00830703	1	1	0.0260101	1	0.00656728	0.023183	0.00715103	1	1	0.0278878	1	1	1
Slackia	1	1	0.140213	0.0336417	0.0325203	0.0187512	0.0469631	0.0851607	0.0425291	0.0559128	0.0825083	0.0389332	0.169099	0.0366435	0.0478012	0.0139704	0.0568828	1	0.0332226	0.242866	0.0344471	0.0292697	0.107655	1	1	1	1	0.0531597	0.0724375	1	0.0105798	1	0.0279767	0.0293772	0.00789266	1	1	0.00688326	0.00867002	1	1	1	0.0214531	1	1	0.0948184	1	1	1
Bordetella	1	1	0.112171	1	0.0325203	0.0375023	0.0156544	0.0638706	0.0567054	0.0139782	1	1	0.0688921	1	0.083652	0.0419111	0.0853242	0.0150489	0.0498339	1	0.0172236	0.0292697	0.0396623	0.0229533	0.0113482	1	1	0.0199349	1	1	1	0.00879817	0.0223814	0.00587544	0.023678	0.0249211	1	0.0206498	0.01734	1	1	1	0.0143021	0.0133111	0.0225251	0.0111551	1	1	1
Synechococcus	1	1	0.0560853	0.0168209	0.0650407	0.0375023	0.0156544	0.0851607	0.0141764	0.0419346	0.0825083	0.0778665	0.0250517	0.0549652	0.0478012	1	1	1	0.0166113	1	0.0172236	0.0219523	0.0226642	1	0.0113482	1	1	0.0132899	0.0120729	1	1	1	0.0111907	1	0.0157853	0.00830703	0.0180848	1	1	0.0217912	1	0.0115915	0.0214531	1	1	0.0167327	1	1	1
Oscillibacter	1	1	0.196298	0.0841043	0.0650407	0.168761	0.10958	0.276772	0.0850581	0.181717	0.495049	0.0583998	0.225465	0.10993	0.143403	0.0977927	0.0711035	0.0601956	0.0830565	0.0303582	0.292801	0.0365872	0.130319	0.0153022	1	1	1	0.0132899	0.0241458	1	0.0105798	0.0263945	0.0223814	0.0293772	0.00789266	0.0249211	1	1	0.0433501	1	1	0.0927321	0.0643593	1	1	0.00557756	1	1	1
Barnesiella	1	1	0.0560853	1	1	0.0187512	0.0782718	0.255482	0.0708818	0.181717	0.123762	0.0389332	0.131521	0.146574	0.119503	0.0838223	0.0426621	0.0300978	0.365449	0.0607165	1	0.139031	0.0963227	0.0153022	1	0.0146864	1	1	1	1	1	0.0439908	0.755371	0.0646298	0.023678	0.0913773	0.00904241	0.00688326	0.0520201	0.0145275	1	1	0.0643593	1	1	1	1	1	0.0151515
Anaerotignum	1	1	0.0280426	0.0168209	1	1	0.156544	0.0638706	0.0567054	0.0419346	0.103135	1	0.212939	0.0366435	0.0119503	0.0419111	0.0284414	0.0300978	0.415282	0.0303582	0.120565	0.0219523	0.0113321	1	1	1	1	1	0.519136	1	0.0105798	1	0.0335721	0.00587544	0.00789266	0.00830703	0.0271272	1	1	1	0.0131346	0.00579576	0.271739	0.00665557	0.0112625	1	1	0.0112822	1
Herbinix	1	1	1	0.0504626	0.0325203	1	0.0313087	0.0212902	0.0567054	1	0.0825083	0.0194666	0.0187888	0.0549652	0.0956023	0.0558815	0.0142207	0.0150489	1	1	0.0516707	0.0365872	0.0396623	0.0229533	1	1	1	0.00664496	0.0362188	1	1	1	0.00559534	0.0117509	0.0157853	0.00830703	0.0361696	0.00688326	1	0.00726375	0.0131346	1	0.00715103	1	0.0112625	1	1	0.0112822	0.0151515
Desulfotomaculum	1	1	0.0280426	1	0.0325203	1	1	1	0.0425291	0.0139782	0.0206271	0.0583998	0.0187888	0.0732869	1	0.0139704	0.0426621	1	0.0664452	1	0.0344471	0.0219523	0.0226642	0.0153022	1	1	1	0.00664496	0.0603646	1	1	1	0.00559534	0.00587544	0.00789266	0.0166141	0.0180848	1	1	1	1	0.0115915	0.0286041	0.00665557	0.0225251	1	1	1	0.0151515
Hymenobacter	1	1	0.0560853	1	0.097561	1	1	0.0212902	1	0.0419346	0.0412541	1	0.0125258	0.0183217	0.0358509	1	1	0.0150489	1	1	1	1	0.0283302	1	1	1	1	1	1	1	1	1	0.00559534	0.00587544	0.00789266	0.0249211	1	1	0.00867002	1	1	1	0.00715103	1	1	1	1	0.00564111	1
Desulfitobacterium	1	1	1	1	1	1	0.0156544	1	0.0141764	1	0.0206271	1	0.0250517	0.0183217	0.0358509	0.0279408	1	0.0150489	0.0166113	1	1	1	0.00566604	1	1	1	1	1	0.0241458	0.0335458	1	0.00879817	0.0111907	1	0.0315706	1	0.0180848	1	0.00867002	0.0145275	1	0.00579576	0.00715103	1	1	1	1	1	1
Planococcus	1	1	1	1	0.0325203	1	1	0.0212902	1	0.0419346	0.0206271	0.0194666	0.0313146	0.0366435	0.0478012	1	0.0284414	0.0150489	1	0.0303582	1	0.0146349	0.0226642	1	1	1	1	1	0.0120729	1	1	1	0.00559534	0.0117509	0.023678	1	0.00904241	1	1	1	1	1	0.00715103	0.00665557	1	0.00557756	1	0.00564111	1
Desulfosporosinus	1	1	0.0560853	0.0168209	1	1	0.0156544	0.0425804	1	0.0419346	0.0206271	0.0583998	0.0438404	0.0366435	0.0239006	0.0279408	1	1	1	0.0303582	0.0172236	0.00731743	0.0113321	1	1	1	1	0.0132899	0.0362188	1	0.0105798	1	1	0.0117509	0.0157853	1	0.00904241	1	0.01734	1	0.00656728	0.0115915	0.0143021	1	1	0.00557756	1	1	1
Mageeibacillus	1	1	0.0280426	0.0168209	1	0.0187512	1	0.0212902	0.0283527	0.0419346	0.0412541	0.0389332	0.0438404	0.0366435	0.0239006	0.0139704	1	1	1	1	0.0172236	0.0219523	0.0113321	0.00765111	1	1	1	1	0.0241458	1	1	1	0.0111907	1	0.00789266	0.00830703	0.0180848	1	0.0346801	0.00726375	1	0.00579576	0.0214531	1	1	1	0.00868659	1	1
Murdochiella	1	1	0.0560853	0.0168209	0.0325203	0.0187512	0.0782718	0.0212902	1	0.0139782	0.0206271	0.0973331	1	0.0183217	0.0119503	1	1	0.0150489	0.0166113	1	0.0172236	1	0.0113321	0.0229533	1	1	1	1	0.0845104	1	0.0105798	1	1	0.00587544	0.157853	0.00830703	0.0271272	1	0.00867002	1	0.00656728	0.00579576	0.0143021	1	1	1	1	1	1
Vibrio	0.235294	1	0.0280426	0.0168209	0.0325203	0.0187512	0.0156544	0.0425804	0.0141764	0.0419346	0.0206271	0.0194666	0.0250517	0.0732869	0.0597514	0.0419111	0.0284414	0.0150489	0.0332226	1	0.0172236	0.0219523	0.0339963	1	0.0113482	1	1	0.00664496	1	1	0.0105798	0.0175963	1	0.0117509	1	0.0166141	0.0271272	1	0.01734	0.0217912	0.00656728	0.00579576	0.00715103	0.00665557	1	1	1	1	1
Cellulosilyticum	1	1	1	1	1	1	1	1	1	1	0.0618812	0.0389332	0.0313146	0.0366435	0.0358509	0.0139704	0.0142207	0.0451467	1	1	0.0344471	0.0146349	0.00566604	1	1	0.0146864	1	0.00664496	0.0120729	1	0.0105798	1	0.016786	0.0235018	0.0157853	0.0166141	0.0180848	1	0.00867002	1	0.00656728	0.168077	1	1	1	1	1	0.00564111	1
Neisseria	1	1	0.0280426	1	1	0.0187512	1	1	1	0.0139782	0.0412541	1	0.0250517	0.0183217	1	0.0139704	0.0142207	1	1	0.0303582	0.0344471	1	0.0226642	1	1	1	1	0.0132899	1	1	0.0317393	1	0.00559534	0.00587544	1	0.00830703	0.0271272	1	0.01734	0.203385	0.045971	1	0.00715103	0.0133111	0.0901002	0.0557756	0.0521195	0.0958989	0.0151515
Libanicoccus	0.117647	1	2.38362	0.605551	0.520325	0.0375023	0.939261	1.02193	0.652112	0.0419346	0.70132	0.233599	1.08348	0.0549652	0.298757	0.586756	0.383959	0.647103	0.0166113	0.0303582	0.72339	0.0585394	0.81591	0.168324	1	1	1	0.405343	0.350115	1	1	0.0263945	0.0279767	0.146886	0.00789266	0.157834	1	0.185848	0.286111	0.0145275	0.0131346	0.023183	0.0214531	0.00665557	0.0225251	0.133861	1	1	1
Selenomonas	1	1	0.308469	0.0168209	0.0325203	0.0562535	0.156544	0.212902	0.0992345	0.069891	0.103135	0.194666	0.162836	0.274826	0.119503	0.0838223	0.0711035	0.0300978	0.0332226	0.0607165	0.0861178	0.051222	0.135985	0.0306044	1	1	1	0.0398698	0.0241458	1	5.4909	0.0263945	0.139884	0.0411281	1	0.0664562	1	1	0.0433501	1	0.0525383	0.00579576	0.0357551	0.00665557	0.0112625	4.01026	1	0.0169233	0.0151515
Staphylococcus	0.235294	1	0.0280426	0.0336417	0.0325203	0.0375023	0.0469631	0.0425804	0.113411	0.0559128	0.0412541	0.0583998	0.0563663	0.0549652	0.0597514	0.0279408	0.0568828	0.0601956	0.0166113	0.0910747	1	0.0365872	0.0566604	0.0153022	1	0.0734322	0.0536193	0.00664496	0.0603646	1	14.1346	1	0.0615488	0.0587544	0.0394633	0.0747633	0.0723393	0.0137665	0.0260101	0.029055	0.0262691	0.0927321	0.0357551	0.0732113	0.0337876	1	1	0.0169233	0.0151515
Lactococcus	1	1	0.0560853	0.0168209	1	0.0187512	0.0156544	1	0.226822	1	1	0.1168	0.0688921	0.0183217	0.0358509	0.0279408	0.0426621	0.0150489	0.0166113	0.0303582	0.0172236	0.321967	0.0679925	0.0994644	0.0794371	0.0293729	0.0268097	0.0664496	0.0482917	0.0335458	0.0423191	1	0.0447628	0.0235018	0.0157853	0.00830703	0.0361696	0.0137665	0.01734	0.0435825	0.0262691	0.0463661	0.0214531	3.38103	0.0450501	0.0111551	0.0173732	0.0225644	0.0757576
Prevotella	1	1	0.252384	1	4.26016	0.0750047	0.187852	0.191612	0.0850581	0.15376	1.58828	1.5184	0.288094	0.128252	0.764818	0.0279408	0.0426621	0.0451467	3.78738	1	0.740613	0.0585394	0.878237	0.956389	1	0.484653	1	0.00664496	0.0120729	1	0.126957	0.0351927	0.570725	0.0117509	0.0315706	8.64762	0.822859	0.0137665	0.407491	5.46234	3.21797	0.0115915	0.0143021	0.0199667	5.19203	1.39997	0.38221	8.17961	1
Megasphaera	1	1	4.12227	1	0.0650407	0.0187512	0.0156544	0.0212902	0.0141764	9.46324	12.8713	4.88612	0.0438404	1	0.0119503	0.0279408	1	1	0.0166113	1	0.0344471	0.446363	4.03422	0.849273	1	1	1	0.611336	0.20524	1	0.0528989	1	0.0615488	6.39248	1	0.0415351	1	0.0688326	0.0260101	1	0.118211	0.00579576	0.0143021	1	0.225251	1	0.121612	0.0564111	0.0606061
Aeromonas	1	1	0.0280426	1	1	0.0375023	0.0156544	0.0638706	0.0425291	0.0279564	0.0412541	0.0778665	0.0563663	0.0732869	0.0956023	0.0279408	0.0142207	0.0150489	0.0332226	0.0303582	0.0172236	0.0219523	0.0566604	1	0.0226963	1	1	0.0132899	0.108656	1	0.0105798	0.00879817	0.0335721	0.00587544	0.00789266	0.00830703	0.00904241	1	1	1	0.00656728	0.00579576	1	1	1	1	1	1	0.0151515
Desulfovibrio	1	1	1.06562	0.0672834	1	0.0562535	0.0469631	0.106451	0.0708818	0.223651	0.103135	0.0778665	0.0688921	0.293148	0.179254	0.0558815	0.0426621	0.0150489	0.0664452	1	0.0172236	0.0292697	0.0849907	0.0153022	1	1	1	0.00664496	0.0241458	1	0.0211595	0.0263945	0.0503581	0.0117509	0.568272	0.00830703	0.0180848	1	0.0260101	1	0.31523	0.0173873	0.0214531	0.00665557	1	0.00557756	1	1	0.0151515
Bacillus	0.117647	1	0.196298	0.134567	0.292683	0.0937559	0.0782718	0.170321	0.226822	0.139782	0.165017	0.233599	0.144047	0.146574	0.203155	0.153674	0.113766	0.120391	0.0664452	0.303582	4.1681	0.160983	0.124653	0.107116	0.261008	0.0440593	0.0804289	0.0664496	0.217313	0.301912	0.148117	0.0439908	0.106312	0.117509	0.0947119	15.1603	15.6072	0.0688326	0.0260101	0.0363187	0.0985092	3.43688	0.0858124	0.1198	0.101363	0.0669307	1	0.05077	0.0757576
Clostridium	1	0.202327	0.280426	0.504626	1.30081	0.375023	0.328741	0.361933	0.765523	0.46128	0.825083	0.778665	2.56153	0.513008	0.84847	0.3772	0.426621	0.662152	0.149502	0.880389	0.654495	0.395141	0.509944	0.351951	1	1.11617	0.0268097	0.179414	1.21937	1	12.8544	0.0263945	2.50671	0.346651	0.284136	0.639641	0.397866	14.1244	0.615571	2.7239	1.36599	4.25409	0.164474	2.92845	0.0337876	0.0167327	0.156359	11.0848	9.9697
Rothia	1	1	0.504767	0.0841043	0.097561	1	1	0.0638706	0.0283527	1	1	0.155733	0.0626292	1	0.131453	0.0279408	0.0284414	0.0150489	0.0166113	1	0.0172236	6.6735	0.147317	9.10482	7.64866	13.3794	1	0.0598046	0.0603646	0.301912	0.0423191	1	0.0111907	0.0822562	1	3.04037	0.153721	3.76514	0.0260101	6.76981	10.7244	0.23183	0.00715103	9.198	10.8233	2.34815	7.22724	2.7585	0.166667
Actinomyces	1.76471	1	0.560852	0.571909	1	0.0187512	0.0939261	0.0638706	0.0992345	0.0139782	0.0206271	0.0973331	0.0626292	0.0916086	0.0478012	0.0558815	0.0284414	0.0150489	0.0332226	1	0.0172236	0.0292697	0.356961	0.0229533	5.67408	0.0587458	0.0268097	0.704366	0.0120729	10.8353	2.58146	1	0.0223814	1.73913	0.347277	1.51188	0.144679	1	0.00867002	0.791748	10.6259	0.399907	0.0143021	13.5374	11.9495	22.6281	11.2839	0.338467	0.0151515
Corynebacterium	62	1	0.308469	0.0672834	0.0325203	0.0375023	0.156544	0.170321	0.15594	0.111826	0.165017	0.1752	0.156573	0.128252	0.167304	0.181615	0.19909	0.0601956	0.0498339	1	0.103341	0.0731743	0.0906567	0.0229533	0.192919	0.0146864	0.0268097	0.0664496	0.0482917	0.201275	0.0528989	0.0175963	0.0223814	0.0822562	0.26835	0.0498422	0.00904241	0.00688326	0.0260101	0.0217912	0.249557	0.0347745	0.0286041	0.179701	0.202726	0.0948184	0.112926	0.0169233	0.0151515
Enterococcus	28.7059	1.21396	0.112171	0.992431	0.195122	0.0937559	0.187852	0.127741	0.226822	0.377411	0.391914	0.194666	0.206676	0.128252	0.286807	0.447052	0.270193	0.300978	0.182724	4.94839	4.40923	0.160983	0.124653	0.175976	0.0226963	0.0440593	3.13673	0.272443	0.241458	1.1741	6.76047	10.2939	1.45479	0.646298	0.023678	0.182755	0.651053	0.0412996	0.0953702	0.138011	0.952256	0.312971	1.53032	12.1531	0.0901002	0.267723	0.277971	1.38207	14.5758
Odoribacter	1	0.202327	1	0.0168209	0.292683	0.168761	0.375704	0.212902	0.0708818	0.111826	0.660066	0.0389332	0.187888	0.403078	0.143403	0.0139704	0.142207	0.0752445	30.0664	0.0607165	0.0516707	0.109761	0.311632	0.06886	1	1	0.0268097	0.0199349	0.0603646	1	0.0105798	0.0263945	0.0279767	0.0293772	0.102605	0.132912	0.0361696	0.0206498	0.0693601	0.00726375	1	0.0115915	0.264588	1	1	1	1	1	1
Alistipes	1	0.202327	0.869321	0.0336417	0.0650407	0.150009	0.266124	0.149031	0.0850581	0.559128	0.453795	0.0778665	0.338198	0.274826	0.191205	0.0419111	0.142207	0.27088	2.25914	0.0303582	0.206683	0.117079	0.362627	0.0535578	1	1	1	0.00664496	0.132802	1	0.0105798	0.325532	3.65376	0.0352526	0.047356	0.116298	0.0180848	0.027533	0.0867002	0.0217912	0.420306	0.023183	0.235984	1	1	0.0278878	1	1	1
Eggerthella	1	2.4785	0.280426	0.437342	0.130081	0.225014	0.187852	0.383223	0.0283527	0.237629	0.0825083	0.136266	0.338198	0.567974	0.908222	0.0977927	0.540387	0.195636	3.50498	2.3983	0.0344471	0.117079	0.232308	0.0306044	0.0453926	0.0146864	13.378	10.9177	0.0603646	1	1	0.0263945	9.05327	9.39483	15.3749	7.23542	3.92441	0.0137665	0.10404	1	1	0.0115915	2.46711	3.02163	0.0225251	0.529868	0.00868659	1	1
Flavonifractor	1	0.0505817	1.37409	0.269134	0.097561	0.431277	0.61052	0.447094	0.283527	2.90746	0.536304	0.408799	4.01453	0.989373	0.41826	0.34926	1.46473	0.376223	25.9468	35.4584	0.861178	0.109761	0.317298	0.0382555	0.0113482	1	1	4.79766	8.51141	1	0.581887	0.131973	0.223814	6.14571	0.299921	3.34773	1.22977	1	0.329461	1	0.00656728	11.9393	14.7311	1	1	0.0111551	1	1	1
Escherichia	1	7.99191	2.74818	1.22792	0.357724	0.900056	0.0156544	0.404514	1	0.0419346	0.330033	0.0194666	0.0187888	3.90253	1	1	0.0284414	0.0300978	1	1	1	0.00731743	0.0339963	6.81714	1	0.0146864	17.5603	8.4391	0.567427	1	1	0.0879817	0.184646	0.170388	0.11839	0.0249211	1	13.5394	15.7968	19.9027	12.8062	15.7239	21.0598	2.88186	1	0.50198	1	1.65285	1.45455
Eubacterium	1	0.0505817	2.72013	1.83347	3.38211	2.19389	3.06825	2.32063	4.12532	1.46771	6.20875	5.15865	8.14179	2.91316	6.60851	3.54848	4.69283	4.8608	0.531561	0.819672	4.87427	10.0322	14.5731	12.8768	0.0113482	0.132178	0.160858	0.671141	1.53326	1	0.253914	0.0439908	0.32453	2.6792	0.110497	0.880545	1.20264	0.0963656	1.0404	0.108956	0.0985092	0.278196	0.657895	0.0133111	0.0225251	0.050198	0.0173732	0.0282056	0.30303
Parabacteroides	1	57.3091	2.13124	4.6762	0.0325203	0.431277	6.49656	4.83287	0.666289	2.85155	2.02145	0.1168	0.764076	1.79553	3.03537	0.936016	8.02048	13.6343	1.99336	1.85185	0.0172236	0.48295	0.220976	0.0994644	1	1	0.0536193	0.451857	0.748521	1	1	0.844624	0.0279767	0.299647	0.0631413	1.04669	0.0180848	0.0688326	9.80579	0.00726375	0.00656728	0.0347745	0.729405	1	1	0.0111551	1	1	1
Lachnoclostridium	1	0.151745	6.53393	2.35492	1.52846	2.62516	2.37946	3.17224	2.73604	2.5021	3.44472	5.06132	2.31102	4.48882	4.60086	2.66834	3.27076	2.22724	1.9103	1.18397	3.82363	1.15615	1.84146	11.2854	0.0340445	0.0293729	0.0268097	1.63466	8.36653	0.0335458	2.08421	0.237551	3.59781	1.61575	14.7435	2.39242	13.6812	0.144548	2.96515	0.05811	3.37558	3.46586	6.50029	0.685524	1	0.0892409	0.00868659	0.05077	0.121212
[truncated: 532 more columns]
