# Supplementary material for: Metabolic and functional pathways of gut microbiota in patients with gastric cancer: The DELIVER trial (JACCRO GC-08)
Source: Research Square preprint supplement (doi:10.21203/rs.3.rs-7899663/v1), 2025-11-28
Supplement: Supplementary file 3 [file 35b1ce6937af33ff65858ed3.xlsx]

## Sheet: Phylum
Phylum	GC08-020	GC08-072	GC08-138	GC08-139	GC08-153	GC08-165	GC08-181	GC08-009	GC08-010	GC08-013	GC08-017	GC08-022	GC08-026	GC08-038	GC08-043	GC08-045	GC08-047	GC08-050	GC08-052	GC08-056	GC08-059	GC08-062	GC08-064	GC08-066	GC08-074	GC08-077	GC08-079	GC08-081	GC08-082	GC08-090	GC08-091	GC08-092	GC08-098	GC08-099	GC08-100	GC08-107	GC08-110	GC08-111	GC08-115	GC08-122	GC08-125	GC08-127	GC08-128	GC08-129	GC08-132	GC08-133	GC08-134	GC08-135	GC08-136
Acidobacteria	0.00951867	0.0215757	0	0.0295097	0.00396291	0.0252972	0.0379467	0.0156814	0.0298954	0	0.00802729	0.00547495	0.00338742	0.00431183	0	0.0165366	0	0.0221029	0	0.0133339	0.00326168	0	0.00425967	0.0130813	0.00539258	0.0186211	0.0114008	0	0.0431383	0.00731048	0.0074474	0.00304109	0.00857817	0.0149633	0.00619963	0	0.00364352	0.0119942	0.0164029	0.0249377	0.00287712	0.00604102	0.029511	0.0158554	0	0	0.00642715	0.0124793	0
Actinobacteria	9.8899	10.0903	8.30769	11.8756	15.6257	1.5865	6.80626	4.60248	14.6114	12.5407	7.75035	18.0728	15.9039	17.9545	14.3318	1.91494	8.36095	3.71961	9.13746	16.3429	8.32382	7.82442	9.90373	10.0007	15.3419	6.38704	8.03755	21.6926	17.5573	10.56	9.92739	7.08877	20.7935	5.34191	12.5852	14.0542	19.4782	16.0923	5.62208	26.8628	8.37241	8.90144	10.6197	4.85439	5.13	17.7172	18.2467	12.0862	16.3698
Aquificae	0	0.00359596	0	0.00421567	0	0.00361389	0.0034497	0.00392034	0.00747384	0.00509372	0.00802729	0	0	0.00862366	0.0062029	0	0	0	0.00330349	0.00444464	0	0	0	0	0.00539258	0	0	0.0082247	0	0.00365524	0.0148948	0	0	0	0	0	0	0.00399808	0	0	0.00287712	0	0	0	0	0	0	0	0
Armatimonadetes	0.00317289	0.00359596	0	0	0	0.0361389	0.00689941	0.011761	0	0	0	0	0	0	0	0	0	0.00315756	0	0	0	0	0	0	0	0	0.00380026	0.00411235	0	0	0	0	0	0	0	0	0	0	0	0.00997506	0	0	0	0	0	0	0.00642715	0.00311983	0
Bacteroidetes	45.769	41.2456	10.1795	40.9468	36.4587	51.086	38.992	31.6881	38.9051	5.2771	31.178	30.8185	20.8157	22.6716	45.0796	54.574	34.3197	53.8364	41.9477	14.6273	45.145	11.1128	27.7262	42.0368	7.90552	25.1431	28.5019	30.6576	1.87112	32.6888	42.7146	48.2286	3.64143	0.0299267	45.8989	23.1559	23.6537	9.45946	48.6222	35.4564	41.9973	33.2316	50.3246	32.9792	43.0266	0.688509	1.33685	19.1776	3.91431
Caldiserica	0.00317289	0	0	0	0	0	0	0	0	0.00509372	0	0	0	0	0	0	0	0	0	0	0	0	0	0	0	0	0	0	0	0	0	0.00304109	0	0	0	0	0	0	0	0	0.00287712	0.00302051	0.00421585	0	0	0	0	0	0.00468779
Calditrichaeota	0.00317289	0	0	0.00421567	0	0	0.0034497	0	0	0	0	0	0	0	0	0	0	0	0	0	0	0	0	0	0.00539258	0.00465528	0	0	0	0	0	0	0.00428908	0	0	0	0	0	0	0.00498753	0	0	0	0.00528513	0.00584283	0	0	0	0
Candidatus Cloacimonetes	0	0	0	0	0	0	0	0	0	0	0	0	0	0	0	0	0.0047344	0	0	0	0	0	0	0	0	0	0	0	0	0.00365524	0	0	0	0	0	0	0	0	0	0	0	0	0	0.00264257	0	0	0	0.00623967	0
Candidatus Saccharibacteria	0.00317289	0	0.00854701	0	0	0	0	0	0	0	0	0.0109499	0	0	0	0	0	0	0	0	0.00652337	0	0	0	0	0	0	0	0	0	0	0	0	0	0.00619963	0	0	0	0.00410071	0	0	0	0	0	0	0	0	0	0
Chlamydiae	0.00317289	0	0	0	0	0	0	0.00392034	0	0	0	0.00547495	0	0	0	0.00330732	0	0	0	0.00444464	0	0.00505127	0	0.00654065	0	0.00931055	0	0	0	0	0.0037237	0	0	0	0	0	0	0	0	0.00498753	0	0	0.00421585	0	0	0	0.00642715	0	0.00937559
Chlorobi	0.0158645	0.0323636	0.017094	0.0295097	0.00396291	0.0397528	0.034497	0.0588051	0.044843	0.00509372	0.0120409	0.0328497	0.00677484	0.025871	0.0124058	0.0132293	0.0047344	0.0347332	0.00660698	0.00888928	0.0130467	0.0101025	0.0298177	0.019622	0	0.0232764	0.0114008	0.00411235	0.037746	0.0292419	0.0297896	0.0152054	0.00857817	0	0.0154991	0	0.0109306	0.0199904	0.0205036	0.0448878	0.0143856	0.012082	0.00421585	0.0211405	0.0116857	0	0.0192814	0.018719	0.0140634
Chloroflexi	0.0317289	0.0359596	0.00854701	0.025294	0.0118887	0.0252972	0.0448461	0.023522	0.0149477	0	0.0521774	0.0109499	0	0.0388065	0.00930435	0.0165366	0.0047344	0.0347332	0	0.0133339	0.0163084	0.0252564	0.0212983	0.0327033	0	0.00931055	0.0114008	0.0164494	0.0700998	0.0255867	0.0223422	0.00608217	0.0171563	0	0.0309981	0	0.0218611	0.00399808	0.0369064	0.0199501	0.0172627	0.0211436	0.0421585	0.0290682	0.0175285	0	0.0321357	0.00623967	0
Chrysiogenetes	0.00951867	0	0	0	0	0	0.00689941	0.00392034	0.00373692	0	0	0.0164249	0	0	0	0	0	0.00315756	0	0	0.00652337	0	0	0	0.00539258	0	0	0	0.0107846	0	0	0	0.00857817	0	0	0	0	0	0.00410071	0.0149626	0.00287712	0.00302051	0	0.00528513	0	0	0	0	0
Crenarchaeota	0	0	0	0	0	0	0	0	0	0	0	0	0	0	0	0	0	0	0	0	0	0	0	0	0	0	0	0	0	0.00365524	0	0	0	0	0	0	0	0	0	0.00498753	0	0	0	0	0	0	0	0	0.00468779
Cyanobacteria	0.0761494	0.0719192	0.0769231	0.105392	0.0594436	0.101189	0.110391	0.0980085	0.093423	0.0407498	0.0521774	0.0602245	0.0338742	0.0991721	0.0558261	0.062839	0.0615472	0.0789391	0.0396419	0.0266679	0.0587103	0.0404102	0.063895	0.0457846	0.0323555	0.083795	0.0684047	0.0287864	0.113238	0.0402076	0.0930925	0.0669039	0.0857817	0.0149633	0.0650961	0.0209556	0.0400787	0.0199904	0.0943164	0.084788	0.0460339	0.0845743	0.0885329	0.0528513	0.0233713	0.0356125	0.0578443	0.056157	0.0515657
Deferribacteres	0	0	0.017094	0	0	0	0.0034497	0	0.00373692	0	0	0	0	0	0	0	0	0	0	0	0	0	0	0	0	0	0	0	0.00539229	0	0	0	0	0	0	0	0	0	0	0	0.00287712	0	0	0	0	0	0	0	0
Deinococcus-Thermus	0.028556	0.0611313	0.017094	0.0758821	0.0237774	0.0542084	0.0724438	0.0509644	0.0859492	0.0152812	0.0200682	0.0328497	0.00677484	0.051742	0.0248116	0.0595317	0.0094688	0.0442059	0.0165175	0.0311125	0.0260935	0.0202051	0.012779	0.019622	0.00539258	0.051208	0.015201	0.00411235	0.167161	0.0109657	0.0521318	0.00912326	0.0600472	0.0149633	0.0402976	0	0.0145741	0.0239885	0.0492086	0.104738	0.0316483	0.0362461	0.0590219	0.0237831	0.0233713	0.0178063	0.0321357	0.0124793	0.00468779
Dictyoglomi	0.00634578	0	0	0	0	0	0.0034497	0	0	0	0	0	0.00338742	0	0.00310145	0	0	0	0.00330349	0	0	0	0	0	0	0	0	0	0	0	0	0	0.00428908	0	0	0	0	0	0	0	0.00287712	0	0.00421585	0	0	0	0	0.00311983	0
Elusimicrobia	0.00634578	0	0	0	0.00396291	0	0	0.00392034	0	0	0	0	0.00338742	0	0.00310145	0	0	0	0	0	0.00326168	0	0.00425967	0	0.00539258	0.00465528	0	0	0	0	0	0	0.00428908	0	0	0	0	0	0	0	0.00287712	0	0	0.00264257	0	0	0	0.00311983	0
Euryarchaeota	3.02376	0.798303	0.025641	0.0295097	0.0118887	0.0397528	0.717538	3.6812	0.0336323	0.0152812	0.0240819	0.0109499	0.0101623	0.025871	0.0124058	1.25678	0.0142032	0.0189454	0.00330349	0.0133339	0.00652337	0.0151538	0.0212983	0.019622	0.0161777	0.0139658	0.0304021	0.00411235	0.0916689	0.014621	0.0260659	0.0121643	0.0257345	0.0598534	0.0216987	0	0.00364352	0.0199904	0.0533093	0.0897756	0.00863135	0.0151025	0.0463744	0.0211405	0.0116857	0.0178063	0.0128543	0.0155992	0.00937559
Fibrobacteres	0	0.00359596	0.00854701	0.00421567	0.0118887	0	0.00689941	0.00784068	0.00373692	0	0.00401365	0.0109499	0.00338742	0.00431183	0	0	0	0.00315756	0	0.00888928	0.00326168	0.0151538	0.00425967	0	0	0	0	0	0.00539229	0	0	0	0	0.0149633	0	0	0.00364352	0	0	0.00498753	0.00287712	0	0	0	0	0	0	0	0.00468779
Firmicutes	34.5909	38.973	73.3419	40.2723	35.7415	38.2097	46.8401	40.1482	37.6532	63.86	55.1716	41.5549	57.6132	52.9536	34.7083	31.3467	52.7175	38.3233	32.7079	49.2555	38.9086	69.0963	42.5328	33.0564	48.9053	46.576	59.436	45.9843	69.8409	50.7968	41.2028	32.7616	66.6395	73.6795	38.8624	58.6547	39.871	56.8047	22.7508	29.7556	45.2542	48.7148	34.9916	35.709	34.0637	58.8735	77.987	56.2038	71.6248
Fusobacteria	0.0158645	0.0107879	0.410256	0.0168627	0.0198145	0.112031	0.0551953	0.035283	0.0112108	2.44499	0.0602047	0.0985491	0.0372616	0.0388065	0.23571	0.0595317	0.0662816	0.00947269	0.475703	0.0400018	0.0293552	0.303076	0.0340774	8.75139	6.35246	0.130348	0.657445	0.0452358	0.210299	2.73412	0.0446844	0.115561	0.46751	0.433937	0.0464972	0.00698519	0.00728704	0.0199904	0.0123021	0.0199501	0.192767	0.012082	0.029511	0.018498	6.95881	1.74501	0.302076	0.421177	1.47197
Gemmatimonadetes	0	0	0	0	0.00396291	0.00361389	0.0034497	0.011761	0	0	0	0	0.00338742	0.00862366	0	0	0	0	0	0	0	0.00505127	0.00425967	0	0	0.00465528	0.00380026	0	0.0161769	0	0.0037237	0.00608217	0	0	0.00619963	0	0	0.00399808	0.00410071	0.00997506	0	0	0.00421585	0.00264257	0	0	0.00642715	0	0
Ignavibacteriae	0	0	0	0.00421567	0	0.00361389	0.0034497	0	0	0	0	0	0	0.00431183	0	0.00330732	0	0	0	0	0	0.00505127	0.00425967	0	0	0	0	0	0	0	0	0.00304109	0	0	0	0	0	0	0	0	0	0	0	0	0	0	0	0	0
Kiritimatiellaeota	0	0	0	0	0	0	0.0034497	0	0	0	0	0	0	0	0.00310145	0	0	0	0	0	0	0	0.00425967	0	0	0.00465528	0.00760052	0	0.00539229	0	0	0	0	0	0.00309981	0	0	0	0.00410071	0.00997506	0	0	0	0	0	0	0.00642715	0	0
Nitrospirae	0	0	0	0.00843135	0	0.00361389	0	0.00784068	0.00373692	0.00509372	0.00802729	0.00547495	0.00338742	0.00431183	0.00310145	0.00661463	0.0047344	0.00315756	0	0	0	0	0	0.0130813	0.00539258	0.00931055	0	0	0.0107846	0.0109657	0.0074474	0.00304109	0	0	0.00619963	0	0.00364352	0	0.00410071	0	0.00287712	0.00906153	0.00421585	0.00264257	0.00584283	0	0	0.00623967	0
Planctomycetes	0.0222102	0.0287677	0.00854701	0.0295097	0.0158516	0.0542084	0.0310473	0.011761	0.00373692	0.0152812	0.0160546	0.0109499	0.0101623	0.0215592	0.0124058	0.0264585	0.0047344	0.0189454	0.00660698	0.00888928	0.0163084	0.0151538	0.012779	0.0261626	0	0.0186211	0.0114008	0.0082247	0.0323537	0	0.037237	0.0152054	0.00857817	0	0.0185989	0	0.00728704	0.00799616	0.00820143	0.0249377	0.00575424	0.0151025	0.0210793	0.0158554	0.0116857	0	0.00642715	0.018719	0.0187512
Proteobacteria	6.37116	8.40375	7.06838	4.4644	11.9521	8.47819	5.96109	19.3194	8.30717	15.6683	5.06522	3.41637	5.49439	5.98051	5.38722	8.68501	4.14733	3.5712	15.5892	19.4809	6.23308	4.89973	19.4795	5.5988	21.3654	21.1489	2.9756	1.48045	9.30709	2.88033	5.66375	11.4831	8.0549	20.395	2.25356	4.10729	16.8367	17.4596	22.4924	5.40648	3.93302	8.82895	3.54132	24.3803	10.3067	20.863	1.6582	11.7618	6.16914
Spirochaetes	0.0634578	0.0611313	0.0769231	0.0800978	0.00792581	0.0252972	0.0758935	0.0744864	0.0710015	0.0407498	0.0441501	0.0492746	0.0203245	0.0474301	0.0558261	0.0297658	0.0378752	0.0284181	0.0297314	0.0444464	0.0293552	0.0202051	0.063895	0.0392439	0.0107852	0.0651739	0.0228016	0.0205617	0.102453	0.0402076	0.0521318	0.036493	0.051469	0	0.0588965	0	0.00728704	0.0199904	0.0656114	0.0299252	0.0575424	0.0302051	0.0590219	0.0449236	0.0292141	0.0296771	0.0514172	0.0467975	0.0609413
Synergistetes	0.0158645	0.118667	0.034188	1.77901	0.0118887	0.0216834	0.0448461	0.0666458	0.0298954	0.0407498	0.00401365	0.00547495	0.0101623	0.00431183	0.0062029	1.8091	0.0189376	0.0189454	0.00330349	0.0177786	0.00326168	0.0101025	0.00425967	0.0915691	0	0.051208	0.0342023	0	0.0970612	0.0219314	0.0148948	0.00912326	0.0214454	0	0.0309981	0	0.00728704	0.00399808	0.0205036	1.70574	0.0115085	0.0392666	0.0126476	0.0211405	0.0467426	0.0118708	0.0642715	0.0155992	0.0187512
Tenericutes	0.0158645	0.00359596	0.034188	0.00843135	0.0158516	0.00722778	0.0482958	0.023522	0.0149477	0.0152812	0.00802729	0.0109499	0.00677484	0.0215592	0.027913	0.00661463	0.0189376	0.00315756	0.00330349	0.0355571	0.0163084	0	0.00851934	0.00654065	0.0215703	0.107071	0.0380026	0.0328988	0.0808843	0.0255867	0.0148948	0	0.0471799	0	0.0185989	0	0.00364352	0.00799616	0.0123021	0	0.00287712	0	0.0463744	0.00528513	0.00584283	0	0.13497	0.0124793	0.023439
Thaumarchaeota	0	0	0	0	0	0	0.0034497	0	0	0	0	0	0.00338742	0	0	0	0	0	0	0	0.00326168	0	0	0	0.00539258	0	0	0.00411235	0.00539229	0	0	0	0	0	0	0	0	0	0	0	0	0	0	0	0	0	0	0	0.00468779
Thermodesulfobacteria	0	0	0	0	0	0	0	0	0	0	0	0	0	0	0	0	0	0	0.00330349	0	0	0	0	0	0	0	0.00380026	0	0.00539229	0	0	0.00304109	0	0	0	0	0	0	0	0.00498753	0	0	0	0	0	0	0	0	0.00468779
Thermotogae	0.00317289	0	0.017094	0.00421567	0	0.00722778	0.00689941	0.00784068	0.00747384	0	0.00802729	0	0.00338742	0.00431183	0.00930435	0.00661463	0	0.00315756	0.00660698	0	0	0	0.012779	0	0.00539258	0.00465528	0.00760052	0	0.0215692	0.014621	0.0037237	0	0.00857817	0	0.0154991	0	0	0.00399808	0.00820143	0	0.00863135	0.00302051	0.00421585	0.00528513	0.00584283	0	0.0192814	0.0124793	0.0187512
Verrucomicrobia	0.0190373	0.0323636	0.34188	0.202352	0.0158516	0.0758917	0.0724438	0.0392034	0.0597907	0.00509372	0.505719	5.75965	0.00338742	0.025871	0.0124058	0.102527	0.203579	0.221029	0.0165175	0.0222232	1.14811	6.57675	0.0468564	0.222382	0	0.130348	0.110207	0.00411235	0.291184	0.0877257	0.0633029	0.130767	0.0386018	0	0.00929944	0	0.0255046	0.0119942	0.0943164	0.299252	0.0201398	0.0332256	0.0590219	1.78109	0.315513	0	0.00642715	0.0998346	0.196887
[truncated: 536 more columns]
