# Supplementary material for: Metabolic and functional pathways of gut microbiota in patients with gastric cancer: The DELIVER trial (JACCRO GC-08)
Source: Research Square preprint supplement (doi:10.21203/rs.3.rs-7899663/v1), 2025-11-28
Supplement: Supplementary file 4 [file 42393547459a9af23cfb0b90.xlsx]

## Sheet: Pathway_Fig_Cluster
CASEID	GC08-245	GC08-374	GC08-296	GC08-482	GC08-410	GC08-037	GC08-295	GC08-149	GC08-449	GC08-500	GC08-491	GC08-490	GC08-290	GC08-316	GC08-404	GC08-461	GC08-484	GC08-312	GC08-488	GC08-476	GC08-393	GC08-334	GC08-412	GC08-448	GC08-137	GC08-409	GC08-467	GC08-421	GC08-429	GC08-485	GC08-147	GC08-403	GC08-368	GC08-394	GC08-032	GC08-059	GC08-411	GC08-462	GC08-161	GC08-234	GC08-268	GC08-300	GC08-076	GC08-240	GC08-303	GC08-098	GC08-243	GC08-096	GC08-041
Metabolic pathways	13.2543	12.8065	13.7791	13.4528	13.1783	13.7138	14.0816	14.5377	14.3875	14.5306	15.0748	14.9814	14.3596	13.7759	14.0925	13.4732	14.5232	14.8136	14.5953	14.359	14.8781	14.6546	14.7751	13.9629	13.6515	14.3419	13.8827	14.7843	14.4037	14.3552	14.3592	14.3106	14.9598	15.0098	15.0175	14.8096	14.8371	14.795	14.6702	14.8297	14.9547	14.6498	14.9492	14.7232	14.8091	14.4808	14.6592	14.7338	14.8
ABC transporters	9.16034	9.25187	8.61473	8.75712	9.45284	9.07881	8.75732	8.64963	7.01917	6.79517	6.44054	6.87782	8.08323	7.90828	6.91082	7.34734	8.72221	6.83605	7.82961	7.55085	7.02016	7.64086	7.39777	7.95394	7.43155	7.62101	8.30289	7.81344	7.71011	7.85281	7.67033	7.51878	7.44408	6.98029	6.3538	6.59085	6.9537	6.66443	6.86491	6.92854	6.65159	6.76189	6.96628	6.8306	6.90465	7.14138	7.29362	7.49644	7.03296
Ribosome	4.30075	6.63339	6.93698	6.31855	6.65882	6.68458	5.81711	5.66532	6.67179	5.76831	6.22249	6.24369	5.79198	7.25458	7.24069	7.90979	6.16755	5.92005	6.1321	6.04577	6.20127	6.13976	6.28325	6.99382	6.77147	6.61149	6.11391	5.424	6.08704	5.92095	5.65053	5.31223	5.52583	5.60741	5.82247	5.91558	6.05382	5.93601	6.05536	5.53694	5.27936	5.10083	5.05983	5.18001	5.13962	5.23991	5.70294	5.56457	5.56498
Biosynthesis of secondary metabolites	3.37414	3.6529	3.32383	3.4878	3.46837	4.4753	4.59439	5.01932	4.45443	4.46273	4.61188	4.48471	4.80681	3.94263	4.21189	4.24728	4.43942	4.37255	4.41459	4.34925	4.50122	4.48851	4.60161	4.32168	4.2661	4.36547	4.18066	4.34609	4.41827	4.28964	4.43369	4.28632	4.53504	4.53519	4.5448	4.52835	4.44099	4.44462	4.58447	4.53864	4.57771	4.58604	4.52934	4.39042	4.47225	4.44009	4.41916	4.46412	4.57447
Biosynthesis of antibiotics	2.46199	2.33446	2.47654	2.84484	2.58303	2.99494	2.90474	3.06036	3.09228	3.17543	3.32036	3.15888	3.2803	2.8696	3.01186	3.09481	3.08182	3.11067	3.1747	3.06578	3.15707	3.27873	3.11859	3.07384	3.0579	3.12483	2.95678	3.04457	3.11648	3.01324	3.04909	2.94509	3.16008	3.15724	3.18682	3.1631	3.12985	3.22318	3.25786	3.12986	3.20756	3.20542	3.20666	3.0165	3.09789	3.07871	3.15119	3.20535	3.24954
Microbial metabolism in diverse environments	3.19459	2.92867	2.88991	2.75772	2.59086	2.15074	2.03188	2.51686	2.52388	2.2376	2.26969	2.34803	1.99768	2.8815	2.18177	1.89683	2.11286	2.41805	2.15952	2.2454	2.34375	2.17357	2.17686	2.00543	2.09831	2.15491	1.99868	2.12099	2.13693	2.2447	2.23487	2.43902	2.23821	2.20251	2.24574	2.2504	2.25974	2.32395	2.19699	2.20385	2.1757	2.21908	2.37141	2.3514	2.44066	2.27378	2.33069	2.36283	2.25046
Biosynthesis of amino acids	2.03817	1.68602	1.19989	1.38011	1.45521	1.76383	1.75016	2.01581	2.15695	2.00731	2.13261	2.04953	2.44612	1.61134	1.8992	2.04517	2.17321	2.09402	2.07644	1.97723	2.13294	2.22626	2.13564	2.14546	2.09984	2.07198	1.80668	2.12389	2.08466	1.92687	2.04997	1.86085	2.17385	2.0322	2.06917	2.08107	2.05291	2.14686	2.17219	2.18597	2.0957	2.11837	2.02936	1.88001	2.03922	2.03197	2.05071	2.09948	2.05664
Aminoacyl-tRNA biosynthesis	2.53695	3.69179	2.87768	2.90735	2.94481	4.08114	3.89777	3.63158	3.39272	3.2919	3.39196	3.58497	3.17041	3.66078	3.64156	3.84461	3.28344	3.22637	3.39518	3.13632	3.12669	3.48258	3.42838	3.51769	3.64862	3.3542	3.59427	3.08782	3.14543	3.31268	3.22705	3.10106	3.2974	3.51886	3.43787	3.31934	3.30675	3.65278	3.54422	3.35107	3.4497	3.40589	3.50841	3.42065	3.57235	3.5302	3.67378	3.41465	3.51061
Two-component system	2.17692	1.98128	2.39803	2.61962	2.8008	2.83342	2.96396	2.04426	2.49697	2.25941	2.36299	2.48613	1.85719	2.61086	2.67955	2.69448	2.46011	2.57254	2.82586	2.84428	2.50196	2.47374	2.9113	2.79706	2.64938	2.65186	2.98013	3.1109	3.43945	2.83209	3.09362	3.15908	2.47859	2.69424	2.66593	2.95152	2.54436	2.36434	2.37423	2.64497	2.58154	2.75219	2.85177	2.67003	2.51389	2.70168	2.26544	2.49796	2.48639
Homologous recombination	1.34359	1.83427	1.51961	1.66573	1.72278	2.03333	1.99221	2.03711	1.98127	2.06495	2.28717	2.07003	2.30874	2.1033	2.01305	2.26106	1.99246	1.97731	2.02008	2.06295	1.94785	2.05743	1.8571	2.12698	2.13931	1.88923	2.07481	2.21242	2.15623	1.92576	1.92974	1.95135	1.8581	2.04573	2.05784	2.00484	2.07489	2.05865	1.98054	2.01703	2.12194	1.9957	2.01105	2.12548	2.14079	2.27877	1.90683	2.0285	2.17146
Purine metabolism	1.26358	1.85492	1.64812	1.7064	1.77536	2.15647	2.15528	1.9039	2.55673	2.10102	2.00201	2.00745	2.01796	2.01144	2.08886	2.14634	1.83018	1.84992	1.91305	2.06369	1.86765	1.94482	1.93995	1.89092	2.09792	1.98058	2.07464	1.98302	1.97206	2.0212	2.08797	1.93942	1.97837	1.94539	1.94412	1.92943	1.96161	1.96601	2.19669	2.09166	2.06596	2.01526	1.93242	2.07399	1.96785	2.00478	2.02192	2.00706	1.91576
Quorum sensing	2.80705	1.77205	2.94135	2.42012	2.80226	2.97988	2.15269	2.01727	2.10861	2.30077	1.87417	1.78104	3.2312	2.54863	1.98685	2.5828	2.96881	1.98506	2.5993	2.15534	2.03753	2.33016	2.33637	2.88461	3.24492	2.6226	2.66838	2.13364	2.1624	2.17197	2.45621	2.25911	1.86773	1.86597	1.78525	1.97742	2.01371	2.33694	2.53071	2.19324	2.36586	2.29421	2.15058	1.98353	2.14243	2.18578	2.25965	2.38217	2.15845
Oxidative phosphorylation	0.687114	0.74122	2.58599	0.952061	1.0805	1.31971	1.55193	1.13205	0.93001	0.938182	0.951649	1.01483	0.70414	0.983174	1.02302	0.923439	1.01777	0.925843	1.07799	0.853877	1.11986	0.964317	1.05669	0.925806	0.811446	0.93146	1.02592	1.07252	1.09726	0.976751	0.918793	0.920802	1.02931	1.03273	1.1051	1.06511	1.05075	1.05695	0.959373	1.0205	0.983674	0.993664	1.00635	0.997195	1.10713	1.012	0.886642	0.968596	1.02558
DNA replication	0.74788	1.10409	1.11725	1.10204	1.18272	1.08572	1.16623	1.15954	1.1503	1.08585	1.1308	0.961059	1.33975	1.2449	1.1377	0.993831	0.990254	1.04975	1.00877	1.14632	0.929896	1.09559	1.10352	1.08037	0.856584	0.996648	1.0458	1.0006	0.977696	1.07673	1.01119	0.994741	0.9525	1.08396	1.13253	1.00808	1.07735	1.11512	1.18016	1.03299	1.09615	1.08307	1.04066	1.1502	1.10253	1.33613	1.19412	1.14411	1.0778
Nucleotide excision repair	0.7151	1.04654	0.99142	0.993708	1.01118	1.13123	1.26333	1.21959	0.937393	0.987853	0.94095	0.871307	1.05896	0.88625	1.06814	1.07471	1.09386	0.867692	0.874942	0.948895	0.919087	0.941083	0.963067	1.01004	0.993524	1.06042	0.880105	0.937174	0.933252	0.965577	0.929446	0.844011	0.95832	0.96544	1.06666	0.966101	0.901545	1.02296	1.04742	0.928628	1.01677	1.10056	1.19337	1.08366	1.07472	1.07185	1.07567	1.07787	1.10787
Cell cycle - Caulobacter	0.789647	0.956625	0.898167	1.09006	1.13373	1.02062	1.16433	0.923946	1.24167	1.11589	1.29289	1.10195	0.978671	1.27298	1.1595	1.23896	1.11133	1.11147	1.21944	1.18629	1.12767	1.12986	1.07567	1.26215	1.37354	1.15658	1.19739	1.32015	1.27113	1.13935	1.1931	1.12612	1.16201	1.41486	1.28683	1.22837	1.12254	1.1095	1.25504	1.27144	1.19717	1.2124	1.178	1.25759	1.24268	1.22721	1.24959	1.18779	1.30603
RNA degradation	0.966891	1.25287	1.44316	1.27579	1.39277	1.28547	1.27177	1.28068	1.12137	1.36048	1.2521	1.24276	1.40186	1.07934	1.21298	1.27659	1.21565	1.19217	1.21354	1.23507	1.1948	1.5041	1.49273	1.14806	1.46087	1.2647	1.32639	1.37836	1.15415	1.19316	1.17328	1.16067	1.32047	1.27638	1.28263	1.39335	1.27339	1.33123	1.31458	1.34713	1.42037	1.43057	1.33593	1.35587	1.30177	1.35531	1.44151	1.26711	1.36968
Pyrimidine metabolism	0.951705	1.45164	1.17824	1.22761	1.33397	1.48687	1.42211	1.33303	1.43679	1.34927	1.43994	1.37128	1.33056	1.92403	1.38847	1.504	1.30805	1.32138	1.43491	1.39533	1.30327	1.43152	1.3416	1.52253	1.46569	1.4397	1.48917	1.363	1.31668	1.42704	1.40222	1.41035	1.4541	1.42139	1.4927	1.45529	1.50658	1.52547	1.46916	1.46775	1.4645	1.47804	1.47047	1.58362	1.49862	1.50034	1.44753	1.42284	1.553
Mismatch repair	0.950247	1.41589	1.37311	1.45585	1.47672	1.27476	1.43194	1.37091	1.28322	1.21798	1.37744	1.23805	1.31995	1.51019	1.4612	1.39021	1.17594	1.26728	1.30543	1.35304	1.22438	1.25383	1.16705	1.39471	1.58265	1.27318	1.33341	1.31915	1.37353	1.35059	1.34426	1.3983	1.30031	1.41267	1.50618	1.32893	1.40657	1.4022	1.37659	1.29001	1.45142	1.37865	1.44276	1.51749	1.48512	1.45659	1.49968	1.39806	1.48836
Peptidoglycan biosynthesis	0.994529	0.684174	0.929038	1.25232	1.21864	1.41161	1.44938	1.02246	1.50238	1.26972	1.40076	1.33771	1.35769	1.28621	1.30261	1.53355	1.45178	1.28663	1.43961	1.29029	1.30515	1.29361	1.42	1.54096	1.49438	1.35128	1.43614	1.47667	1.44664	1.32222	1.33667	1.30041	1.29236	1.45189	1.35319	1.35153	1.33066	1.3748	1.41581	1.5223	1.31916	1.38748	1.34734	1.32579	1.34774	1.38908	1.40231	1.32398	1.45849
Amino sugar and nucleotide sugar metabolism	1.96584	1.67104	2.13613	2.14094	1.92351	1.52995	1.48033	1.36089	1.39697	1.59454	1.43759	1.35749	1.18978	1.11282	1.54352	1.39571	1.5351	1.57928	1.62617	1.77542	1.79943	1.61152	1.61672	1.45841	1.25775	1.56848	1.61044	1.60829	1.37991	1.60433	1.38133	1.54312	1.53096	1.57106	1.50737	1.78432	1.62823	1.49979	1.39605	1.54836	1.34656	1.61877	1.43263	1.53953	1.4148	1.5106	1.68421	1.61514	1.60346
Starch and sucrose metabolism	3.77214	3.14865	2.63627	2.58493	2.56437	1.29066	0.973544	1.03644	1.64768	1.82594	1.56106	1.98056	2.12379	0.673541	1.64033	1.74679	1.5831	2.21445	1.52479	1.56615	1.64683	1.36604	1.82171	1.63106	1.89463	1.59404	1.64768	1.66655	1.45208	1.36401	1.36552	1.57402	1.24244	1.50145	1.45305	1.49139	1.44902	1.30378	1.6298	1.54235	1.27034	1.30848	1.30762	1.54022	1.4397	1.61976	1.39975	1.44354	1.40463
Carbon metabolism	1.12657	1.06957	0.940934	0.941376	0.909965	0.871399	1.12401	1.00943	1.03185	0.995588	1.01075	0.923439	0.900943	1.37492	1.00126	0.905068	0.97908	1.00407	0.958419	0.972784	1.07345	1.00841	0.975771	0.922942	0.959048	1.01112	0.911317	0.967795	0.959731	0.9845	0.986258	1.05015	1.03403	1.02381	1.05333	1.01749	1.04355	1.09843	1.03563	1.02653	1.01882	1.01257	1.08008	1.03407	1.12107	1.0223	1.05852	1.08805	1.04849
Phosphotransferase system (PTS)	5.41418	3.84458	3.31048	3.18504	3.04958	1.07084	0.38732	0.721857	1.04199	0.809171	1.06716	1.61082	0.602171	0.202087	1.11849	1.13856	0.747517	1.84519	0.725697	1.27049	0.896591	0.628314	1.00779	1.00903	1.26983	0.957475	1.07988	0.82532	0.671969	0.958891	0.851881	1.26562	0.708888	0.854822	0.608097	0.658045	0.653394	0.650017	0.713714	0.66271	0.796198	0.852886	0.705987	1.03348	0.890786	1.03028	1.06935	0.81811	0.735206
Other glycan degradation	0.157983	0.0688005	0.156992	0.535945	0.477211	1.01991	1.04143	0.471411	0.409627	0.755266	0.520965	0.408993	0.489021	0.364785	0.601859	0.475813	0.425501	0.60898	0.599145	0.69133	0.730221	0.667717	0.556395	0.541886	0.456406	0.646821	0.670703	0.740188	0.548018	0.609493	0.439298	0.416399	0.622272	0.499466	0.739642	0.689228	0.63977	0.744725	0.590206	0.705233	0.583975	0.7721	0.483014	0.62956	0.646252	0.593681	0.590642	0.576189	0.728991
RNA polymerase	0.429963	0.685688	0.780092	0.674884	0.677528	0.728145	0.666671	0.77342	0.713934	0.889498	0.603497	0.804439	0.847931	0.602112	0.916393	0.88129	0.757134	0.662672	0.632898	0.553961	0.633077	0.72128	0.730037	0.816964	0.876196	0.781541	0.709985	0.558214	0.562505	0.597529	0.672636	0.643607	0.535933	0.491834	0.65898	0.717893	0.659516	0.686719	0.712312	0.660388	0.647401	0.731273	0.656508	0.739476	0.638657	0.585693	0.789903	0.704838	0.684616
Nicotinate and nicotinamide metabolism	0.307624	0.340732	0.465426	0.48554	0.498487	0.583345	0.758679	1.10692	0.682618	0.644329	0.667042	0.694752	0.766561	0.571975	0.539948	0.519713	0.572045	0.634594	0.615622	0.553503	0.602136	0.677145	0.651243	0.599732	0.473519	0.583709	0.584403	0.600638	0.534484	0.528262	0.562697	0.572529	0.612735	0.611054	0.604797	0.544541	0.566366	0.653199	0.644623	0.594398	0.66633	0.562157	0.615161	0.615409	0.626675	0.57209	0.59297	0.650254	0.604802
Thiamine metabolism	0.425871	0.428089	0.344828	0.399892	0.422424	0.299289	0.550618	0.349709	0.545206	0.542667	0.674878	0.522189	0.660535	0.538482	0.531852	0.471722	0.761905	0.477333	0.488934	0.60097	0.615964	0.571146	0.775986	0.551482	0.465637	0.594363	0.437043	0.642201	0.697289	0.501645	0.584059	0.536889	0.689583	0.668567	0.612602	0.55952	0.520256	0.617521	0.627315	0.59724	0.583671	0.555392	0.584838	0.592727	0.595557	0.541643	0.535545	0.61131	0.645652
Pantothenate and CoA biosynthesis	0.363393	0.485296	0.40838	0.515777	0.519896	0.436851	0.516511	0.457567	0.520122	0.5107	0.587894	0.591688	0.736587	0.441592	0.474199	0.524713	0.607415	0.506809	0.541184	0.572821	0.525393	0.604011	0.602423	0.530756	0.582956	0.542358	0.552238	0.486538	0.525729	0.506079	0.568004	0.502899	0.521042	0.519158	0.505528	0.482555	0.502133	0.55301	0.553285	0.571326	0.556021	0.509409	0.560921	0.467054	0.488853	0.497263	0.536647	0.526898	0.481687
Selenocompound metabolism	0.683019	0.630723	0.480863	0.413353	0.477221	0.433058	0.529416	0.431292	0.706378	0.698397	0.511328	0.468397	0.617446	0.631612	0.462761	0.479442	0.62357	0.438408	0.482643	0.491191	0.477095	0.467347	0.666583	0.538294	0.533748	0.491534	0.481357	0.503349	0.483674	0.514713	0.504192	0.463875	0.498074	0.579924	0.486552	0.444708	0.487638	0.532934	0.521885	0.447752	0.505497	0.484134	0.521025	0.490352	0.509689	0.528013	0.573676	0.561658	0.549132
Porphyrin and chlorophyll metabolism	0.625237	0.437484	0.0689639	0.245172	0.28317	0.204001	0.483671	0.663186	0.467871	0.462443	0.323278	0.271125	0.196328	0.773192	0.515518	0.346678	0.576142	0.492727	0.676272	0.424658	0.599607	0.713559	0.443187	0.351512	0.344537	0.558799	0.447959	0.642101	0.650455	0.499434	0.676347	0.604318	0.796365	0.578497	0.632695	0.71319	0.586116	0.645484	0.433639	0.640516	0.740066	0.596566	0.656196	0.552042	0.760141	0.570752	0.382883	0.552222	0.525104
Pentose and glucuronate interconversions	0.678405	0.656188	0.901439	0.979171	0.852095	0.304527	0.37425	0.181175	0.720441	0.627291	0.630548	0.565654	0.52713	0.498809	0.48864	0.307273	0.606997	0.610194	0.490433	0.535235	0.697092	0.721355	0.502284	0.340627	0.316903	0.62045	0.424382	0.613872	0.57297	0.637215	0.550697	0.61525	0.60271	0.600936	0.57383	0.668362	0.617101	0.58329	0.476093	0.497091	0.605362	0.51532	0.505118	0.587693	0.56479	0.502518	0.5264	0.612247	0.586068
Glycerophospholipid metabolism	0.694605	0.753792	0.924863	0.786434	0.899953	0.882396	1.09584	0.754157	0.83543	0.895237	0.569075	0.564499	0.545658	0.697195	0.709898	0.612294	0.731086	0.707348	0.642847	0.794192	0.684556	0.622372	0.705112	0.72037	0.505935	0.717174	0.571994	0.665166	0.797765	0.654826	0.624262	0.713366	0.718474	0.753384	0.759062	0.592009	0.741339	0.630621	0.687581	0.648825	0.593488	0.738727	0.589869	0.809767	0.688853	0.710536	0.716898	0.662376	0.752819
beta-Lactam resistance	0.679766	0.612072	0.421129	0.808665	0.574934	0.692073	0.396199	0.399794	0.351189	0.749269	0.604802	0.571695	0.397832	0.507352	0.715421	0.666089	0.487943	0.653345	0.686336	0.588753	0.640915	0.594998	0.591945	0.636018	0.775779	0.765162	0.832437	0.649499	0.632221	0.84168	0.670404	0.623289	0.644537	0.589941	0.739081	0.782309	0.619571	0.564672	0.618671	0.69686	0.623074	0.83285	0.648443	0.703359	0.711832	0.723763	0.656084	0.585819	0.632598
Folate biosynthesis	0.100846	0.0463262	0.241896	0.280323	0.300325	0.864542	0.487651	0.843826	0.56028	0.603594	0.792239	0.769645	0.84645	0.526745	0.533108	0.724116	0.659464	0.772455	0.634349	0.59899	0.573173	0.734525	0.667209	0.564662	0.667265	0.628107	0.719273	0.672113	0.772548	0.599128	0.708576	0.590535	0.686571	0.440135	0.569082	0.629885	0.573307	0.636971	0.614063	0.70596	0.823259	0.663787	0.667768	0.553549	0.528734	0.575034	0.564402	0.565946	0.564504
Cationic antimicrobial peptide (CAMP) resistance	0.436026	0.265969	0.46689	0.576933	0.527898	0.277076	0.281009	0.258119	0.502308	0.492551	0.408975	0.438788	0.19461	0.525124	0.53105	0.576918	1.00325	0.446675	0.506604	0.579644	0.553364	0.38275	0.397971	0.533972	0.51319	0.497286	0.55687	0.566325	0.590545	0.643677	0.63813	0.73843	0.583703	0.596704	0.621489	0.559807	0.562722	0.452106	0.453245	0.598362	0.592541	0.546634	0.550875	0.571606	0.515087	0.64508	0.445153	0.44502	0.436828
Bacterial secretion system	0.497286	0.476977	0.322792	0.534493	0.480678	0.632684	0.79931	0.557312	0.710646	0.640772	0.650066	0.74446	0.517709	1.68806	1.20225	0.843048	0.926443	0.644173	0.83853	0.571917	0.921931	0.731473	0.773456	1.09921	0.824702	0.781625	0.939993	0.708732	1.05328	0.739886	0.875077	0.811126	0.819666	0.787494	0.828649	0.835597	1.14196	0.868577	0.78626	0.776325	0.757208	0.894486	0.877751	0.793574	0.936175	0.766585	0.696684	0.758031	1.00355
Protein export	0.998389	1.00597	0.852037	0.90179	0.973472	0.698292	0.915902	0.571545	0.796319	0.720004	0.760158	0.772266	0.656788	0.894115	0.912324	0.948078	0.752547	0.797787	0.949785	0.751835	0.796226	0.815439	0.766492	0.962121	1.00998	0.820343	0.979107	0.801534	0.777146	0.872117	0.879787	0.807094	0.820314	0.881917	0.862906	0.753162	0.905162	0.83361	0.902695	0.900322	0.870503	0.845664	0.828021	0.788406	0.80251	0.781116	0.788007	0.799693	0.82798
Base excision repair	0.96811	1.46366	1.11224	1.0612	1.1259	1.06494	1.00942	1.01326	1.06856	0.95636	0.725936	0.812445	0.716496	1.04789	0.906152	0.911715	0.708148	0.877749	0.916192	0.97094	0.90959	0.862307	0.777601	0.873296	0.996294	0.865638	0.920801	0.817953	0.76552	0.826905	0.889502	1.00497	0.902921	0.993701	0.870255	0.838327	0.870335	0.901342	0.878434	0.906559	0.912947	0.899769	0.929593	0.951925	1.04124	1.10596	0.903477	1.03776	0.836147
Fructose and mannose metabolism	3.2871	2.5553	1.85281	1.57468	1.24548	0.819868	0.404301	0.739489	0.618425	0.778426	0.935678	1.13227	0.311084	0.605561	0.952207	0.871678	0.719181	0.881394	0.843032	1.1294	1.03502	0.650934	0.59148	0.830515	0.731993	0.749129	0.638498	0.932767	1.00544	0.903391	0.770048	0.878741	0.740067	0.919092	0.705998	0.748137	0.801991	0.646488	0.717145	0.737074	0.712015	0.730309	0.709611	0.874734	0.690668	0.752473	0.939111	0.728645	0.942624
Pyruvate metabolism	1.05773	0.955189	0.838496	0.87197	0.914915	0.726523	0.7196	0.728185	0.827646	0.641519	0.655314	0.698841	0.34622	0.704582	0.799373	0.82176	0.577533	0.766937	0.860701	0.73134	0.671145	0.593509	0.527399	0.713171	0.838696	0.68647	0.814694	0.73681	0.66204	0.834751	0.841746	0.784643	0.722621	0.725433	0.792603	0.752014	0.760142	0.679506	0.706363	0.785637	0.79173	0.785326	0.818126	0.744023	0.84962	0.790017	0.888722	0.764916	0.722658
Cysteine and methionine metabolism	0.918127	0.763205	0.548228	0.653635	0.614416	0.664453	0.671537	0.759258	0.843271	0.771031	0.809075	0.70815	1.00902	0.927915	0.76303	0.772088	0.74252	0.732585	0.816541	0.886295	0.765949	0.7775	0.803611	0.791344	0.729101	0.811295	0.729992	0.786111	0.801668	0.776693	0.787561	0.844995	0.749217	0.830753	0.741133	0.714171	0.800186	0.815148	0.86369	0.804535	0.828062	0.775599	0.833489	0.820976	0.762906	0.897993	0.91186	0.874278	0.877563
Alanine, aspartate and glutamate metabolism	0.586728	0.4701	0.486012	0.58431	0.590669	0.728603	0.724417	0.620888	0.764617	0.794522	0.82351	0.840559	0.671279	0.646696	0.815307	0.821626	0.627328	0.815862	0.788592	0.739322	0.782438	0.766417	0.758802	0.81344	0.70479	0.759998	0.694862	0.748832	0.69629	0.793387	0.771686	0.740123	0.829667	0.830407	0.850613	0.804827	0.81914	0.769299	0.782707	0.845351	0.827559	0.812334	0.792394	0.794428	0.811421	0.813838	0.909026	0.828219	0.79878
Galactose metabolism	1.44581	1.18131	0.842815	1.22308	0.917141	0.987549	0.781122	0.529376	1.23347	1.27867	1.02571	1.15557	1.39052	0.502602	0.951894	0.719355	1.18799	1.28627	0.937938	1.18643	1.21827	1.18156	1.25277	0.852658	0.793649	1.00003	0.95401	1.07625	0.941765	0.89989	0.839499	0.906782	1.04081	0.944559	0.899216	0.961263	0.976045	0.96405	0.971998	0.958677	0.91463	0.930043	0.863503	0.985568	1.02042	0.969088	1.02915	1.04485	1.02092
Glycolysis / Gluconeogenesis	1.27228	1.01226	0.985396	0.878117	0.939488	0.444602	0.428748	0.430217	0.444349	0.493718	0.590381	0.664756	0.334291	0.425984	0.534755	0.50285	0.391714	0.772794	0.482206	0.519754	0.517594	0.417513	0.438595	0.480228	0.478857	0.53783	0.565069	0.516608	0.477116	0.48357	0.426256	0.582303	0.434909	0.465378	0.524875	0.466446	0.457089	0.421557	0.468688	0.464798	0.506713	0.467722	0.492402	0.571494	0.537453	0.581288	0.49683	0.47537	0.54268
Pentose phosphate pathway	1.25175	1.15044	0.673572	0.705148	0.678144	0.531717	0.508331	0.42683	0.850361	0.592624	0.493138	0.480934	0.562835	0.759952	0.581253	0.533734	0.649405	0.521582	0.510274	0.657322	0.655014	0.58221	0.573826	0.44554	0.498303	0.541561	0.484927	0.486775	0.492425	0.55193	0.516518	0.578828	0.559813	0.489587	0.507018	0.456222	0.502936	0.504304	0.546361	0.500005	0.508002	0.465774	0.471659	0.581941	0.619182	0.502062	0.521638	0.544935	0.557992
Glycine, serine and threonine metabolism	0.423521	0.316483	0.322867	0.351217	0.351676	0.340853	0.416329	0.422873	0.322502	0.390302	0.411495	0.374297	0.509889	0.708061	0.374304	0.428624	0.39458	0.384195	0.384142	0.43013	0.407284	0.469028	0.424996	0.350647	0.373754	0.421974	0.397214	0.371049	0.356084	0.428067	0.435086	0.420817	0.430194	0.40951	0.470802	0.431685	0.445066	0.452738	0.428598	0.425448	0.478241	0.451703	0.489981	0.427206	0.457482	0.453063	0.420925	0.449838	0.410763
2-Oxocarboxylic acid metabolism	0.239105	0.148272	0.0981038	0.135312	0.12848	0.227471	0.337241	0.298268	0.300837	0.40531	0.38303	0.364047	0.570437	0.223632	0.32514	0.369484	0.453321	0.355145	0.380727	0.334998	0.391754	0.436306	0.388848	0.407545	0.367609	0.363871	0.308144	0.391724	0.390267	0.301817	0.361377	0.297575	0.38256	0.334701	0.357458	0.368778	0.380897	0.390419	0.384027	0.407712	0.364781	0.376623	0.371046	0.320236	0.322537	0.338684	0.321331	0.354656	0.330929
Methane metabolism	0.319171	0.296695	0.182083	0.222075	0.21398	0.16176	0.30074	0.255841	0.249637	0.254084	0.238694	0.231227	0.218731	0.50171	0.279029	0.230643	0.271309	0.254108	0.241607	0.275834	0.294093	0.281047	0.270927	0.237713	0.253097	0.259727	0.218347	0.269714	0.272795	0.244822	0.263671	0.270687	0.268043	0.275224	0.281521	0.257277	0.282863	0.406788	0.279091	0.277648	0.264692	0.262283	0.280834	0.274846	0.298386	0.277255	0.295769	0.308139	0.274516
Carbon fixation pathways in prokaryotes	0.191144	0.216685	0.173237	0.217967	0.205486	0.21935	0.385101	0.289279	0.286185	0.333546	0.308972	0.29079	0.247808	0.420453	0.324097	0.288282	0.300951	0.293836	0.320168	0.285286	0.35283	0.29862	0.308465	0.290032	0.345179	0.308274	0.284506	0.303699	0.318328	0.310828	0.303014	0.304805	0.321614	0.304134	0.340867	0.330107	0.373854	0.341795	0.328845	0.35201	0.342191	0.322698	0.33188	0.333652	0.365014	0.307513	0.311996	0.336263	0.342332
Glyoxylate and dicarboxylate metabolism	0.250551	0.242276	0.224389	0.223784	0.175506	0.163966	0.354905	0.304941	0.251585	0.3181	0.309655	0.266128	0.318757	0.415639	0.280721	0.247693	0.309519	0.304017	0.321029	0.360296	0.372944	0.333913	0.376854	0.277427	0.258309	0.337574	0.267174	0.343424	0.278748	0.302376	0.39158	0.374337	0.351847	0.378878	0.352201	0.377734	0.349853	0.336482	0.310148	0.325358	0.361385	0.324955	0.380823	0.355534	0.368332	0.30447	0.293637	0.321231	0.311706
Phenylalanine, tyrosine and tryptophan biosynthesis	0.288861	0.19063	0.157907	0.219287	0.223656	0.355512	0.319869	0.44309	0.363694	0.310476	0.389278	0.300434	0.381448	0.28816	0.326484	0.342679	0.38817	0.316967	0.375501	0.318415	0.377944	0.362287	0.353409	0.379871	0.350753	0.349998	0.321967	0.384232	0.396481	0.335692	0.379339	0.342172	0.399031	0.363357	0.371543	0.353855	0.366985	0.387198	0.372313	0.36111	0.381122	0.386666	0.379045	0.288671	0.341745	0.343703	0.294427	0.346594	0.360229
Lysine biosynthesis	0.328472	0.230952	0.263875	0.312284	0.339456	0.442772	0.361593	0.400798	0.553501	0.419877	0.382351	0.385371	0.458008	0.386741	0.378484	0.401773	0.373695	0.374404	0.406328	0.401824	0.368474	0.425027	0.369168	0.380265	0.42404	0.38076	0.361137	0.401062	0.376091	0.406783	0.369063	0.341222	0.403336	0.428439	0.38747	0.360397	0.364657	0.404146	0.443051	0.396888	0.371981	0.382717	0.371822	0.409996	0.42037	0.414165	0.482767	0.425908	0.424137
Flagellar assembly	0.00227949	1	1	0.0165886	0.0215101	1	0.292766	0.549389	0.031434	0.143455	0.190716	0.164073	0.029616	0.131101	0.352229	0.0442211	0.101726	0.158337	0.0982611	0.138444	0.114301	0.288618	0.0399396	0.170997	0.0593768	0.154046	0.138777	0.23803	0.646591	0.429882	0.615239	0.663707	0.737981	0.634389	0.473546	0.421797	0.218702	0.240022	0.31234	0.307629	0.168166	0.273044	0.259056	0.339592	0.0914555	0.0806232	0.0823217	0.121796	0.0261507
Biofilm formation - Escherichia coli	0.106959	0.142147	0.059418	0.170813	0.119423	0.124526	0.279479	0.284954	0.179092	0.285403	0.273128	0.347001	0.199304	0.326883	0.229244	0.257978	0.171306	0.248313	0.271022	0.278124	0.254315	0.182876	0.191627	0.212923	0.310254	0.223347	0.216775	0.254383	0.270749	0.379007	0.417233	0.565833	0.261196	0.269315	0.249016	0.364077	0.385238	0.230363	0.235108	0.294671	0.309308	0.294654	0.354429	0.394199	0.263226	0.250304	0.189975	0.208055	0.20312
Lipopolysaccharide biosynthesis	0.000333043	1	0.110029	0.128587	0.0914177	0.0050711	0.135475	0.275615	0.0560256	0.308335	0.606597	0.517652	0.143287	0.309846	0.205672	0.220066	0.0841641	0.24663	0.169983	0.245887	0.24684	0.191224	0.216875	0.0985608	0.155986	0.162041	0.285498	0.319512	0.254018	0.296471	0.38283	0.371404	0.230953	0.250943	0.292227	0.312783	0.342083	0.199037	0.234404	0.211532	0.345182	0.291815	0.47916	0.475235	0.238031	0.25576	0.236166	0.214661	0.340403
Sulfur relay system	0.310021	0.350567	0.34349	0.281687	0.304468	0.357196	0.321566	0.349453	0.384602	0.396958	0.339831	0.379282	0.360065	0.411972	0.398849	0.409935	0.457738	0.401278	0.465748	0.407899	0.438418	0.408427	0.333067	0.419238	0.425476	0.44937	0.42239	0.441535	0.429374	0.41682	0.388637	0.405052	0.53508	0.482632	0.424047	0.508172	0.442483	0.452244	0.408981	0.484055	0.414999	0.455369	0.458397	0.441603	0.445538	0.398958	0.367733	0.446878	0.366227
Glycerolipid metabolism	0.672152	0.653379	0.660072	0.712659	0.657997	0.576977	0.287496	0.440581	0.512652	0.304083	0.322076	0.406946	0.24103	0.292282	0.360134	0.461199	0.353528	0.442094	0.417674	0.471738	0.328676	0.312599	0.256311	0.412341	0.533555	0.34195	0.442943	0.328816	0.366057	0.40954	0.381635	0.357305	0.349557	0.428219	0.36926	0.305448	0.318283	0.3554	0.360904	0.379149	0.349008	0.346013	0.372013	0.365178	0.381839	0.411176	0.482089	0.394758	0.361698
One carbon pool by folate	0.180824	0.334034	0.338861	0.292554	0.355965	0.359058	0.488576	0.394487	0.35019	0.373135	0.378054	0.328841	0.413566	0.424995	0.327887	0.280293	0.388212	0.367184	0.363427	0.33853	0.364507	0.413235	0.364571	0.347045	0.405949	0.356206	0.395256	0.339197	0.343005	0.372431	0.342783	0.344248	0.380218	0.362588	0.387445	0.325401	0.372287	0.397892	0.369392	0.361218	0.381102	0.363672	0.374327	0.382373	0.37292	0.380094	0.346282	0.378952	0.36355
Terpenoid backbone biosynthesis	0.297728	0.441464	0.492185	0.425216	0.434227	0.427802	0.552464	0.39476	0.377006	0.358463	0.41018	0.38023	0.4057	0.348886	0.332841	0.324861	0.318769	0.336155	0.308924	0.353691	0.323918	0.364991	0.346565	0.317676	0.331006	0.327233	0.326693	0.330712	0.335549	0.348539	0.344747	0.349754	0.349712	0.407722	0.366956	0.314449	0.331976	0.355889	0.388519	0.308393	0.367672	0.347342	0.344866	0.398126	0.361206	0.335615	0.400136	0.374731	0.420451
Drug metabolism - other enzymes	0.188655	0.330947	0.320706	0.310931	0.325967	0.369471	0.399418	0.270774	0.316366	0.330481	0.321294	0.326979	0.217523	0.478382	0.346495	0.39847	0.250861	0.339418	0.33415	0.347458	0.358971	0.290817	0.249317	0.322257	0.361756	0.340211	0.336201	0.332746	0.337068	0.362187	0.351513	0.34174	0.349329	0.339932	0.352813	0.357608	0.385586	0.357973	0.332779	0.348722	0.334394	0.343912	0.31508	0.379199	0.373359	0.38406	0.322036	0.331372	0.383144
Arginine and proline metabolism	0.506357	0.579422	0.152802	0.191356	0.206333	0.240923	0.237753	0.188598	0.356325	0.386563	0.419707	0.271014	0.226614	0.356	0.265371	0.282928	0.264594	0.236859	0.276829	0.314857	0.332573	0.255921	0.312433	0.262822	0.21615	0.337258	0.237647	0.374633	0.315864	0.332857	0.321014	0.424761	0.314679	0.375223	0.327056	0.323954	0.31055	0.287128	0.270459	0.314535	0.355265	0.31354	0.382266	0.41654	0.409852	0.361638	0.33403	0.344296	0.408952
Nitrogen metabolism	0.190198	0.119867	0.0969847	0.206301	0.176744	0.33729	0.1824	0.636155	0.262504	0.423249	0.366386	0.402068	0.388882	0.268898	0.287932	0.300755	0.426459	0.33958	0.351673	0.325064	0.414062	0.309831	0.340405	0.383479	0.355679	0.349564	0.447632	0.406029	0.296901	0.38104	0.527909	0.377433	0.41115	0.305187	0.322437	0.511031	0.366547	0.3672	0.339289	0.445171	0.413976	0.403612	0.399413	0.32893	0.309916	0.300424	0.297963	0.312265	0.350029
Propanoate metabolism	0.853954	0.939949	0.393109	0.399237	0.362259	0.298412	0.33634	0.385472	0.502134	0.344885	0.318541	0.27129	0.242792	0.566802	0.394709	0.337372	0.405162	0.28673	0.453839	0.406168	0.441573	0.314751	0.317596	0.351155	0.304459	0.413232	0.463905	0.391725	0.321065	0.368345	0.463887	0.393162	0.369053	0.367035	0.380705	0.381402	0.410369	0.353041	0.336003	0.377898	0.392336	0.386297	0.439905	0.383491	0.443939	0.408203	0.387565	0.424623	0.408576
Fatty acid biosynthesis	0.269802	0.203377	0.271078	0.306132	0.306019	0.434169	0.140155	0.269752	0.30381	0.267098	0.288287	0.367274	0.267343	0.145829	0.33815	0.369055	0.217962	0.364413	0.381171	0.297032	0.272147	0.257257	0.226453	0.317329	0.450429	0.301342	0.406555	0.321773	0.278495	0.349694	0.324145	0.266845	0.304188	0.312676	0.326734	0.330946	0.314749	0.332317	0.290663	0.321382	0.326709	0.3103	0.272476	0.27015	0.327564	0.358324	0.333338	0.282233	0.267559
Fatty acid metabolism	0.226228	0.175088	0.21618	0.255037	0.249266	0.273429	0.145617	0.26078	0.269015	0.244534	0.242036	0.281603	0.269378	0.15127	0.288436	0.244125	0.213395	0.284721	0.287893	0.255415	0.261744	0.256593	0.228718	0.253431	0.276471	0.248079	0.271879	0.263458	0.257829	0.292824	0.266937	0.25052	0.280507	0.294658	0.297417	0.300365	0.27867	0.317672	0.261631	0.281745	0.286964	0.260067	0.241042	0.242777	0.316695	0.295586	0.290478	0.267869	0.253319
Butanoate metabolism	0.411606	0.332835	0.14335	0.165085	0.167119	0.193294	0.241987	0.263585	0.477489	0.203454	0.301523	0.318337	0.160257	0.439959	0.320194	0.281463	0.201385	0.287528	0.267215	0.247435	0.232255	0.214499	0.216172	0.1902	0.323272	0.235623	0.359693	0.254649	0.22778	0.245731	0.279365	0.273756	0.276061	0.226294	0.255542	0.271162	0.268993	0.241562	0.241997	0.24667	0.304777	0.268041	0.35652	0.252378	0.276051	0.292509	0.298081	0.273368	0.237688
Arginine biosynthesis	0.237784	0.146366	0.125039	0.160495	0.164105	0.136755	0.184578	0.169298	0.279476	0.258975	0.228812	0.238907	0.264069	0.20565	0.247519	0.250517	0.247039	0.244546	0.262053	0.230741	0.259796	0.268649	0.257248	0.273838	0.315552	0.250769	0.21932	0.273137	0.262909	0.224639	0.252993	0.226186	0.264328	0.243744	0.272111	0.262918	0.264448	0.252418	0.244468	0.296301	0.249623	0.284622	0.276688	0.238778	0.27024	0.248117	0.244724	0.254785	0.231386
Citrate cycle (TCA cycle)	0.129943	0.0992518	0.13915	0.138447	0.127418	0.116526	0.294946	0.213695	0.11747	0.176029	0.183027	0.192907	0.134197	0.216028	0.171525	0.161265	0.14591	0.167512	0.157673	0.151501	0.181455	0.153181	0.166043	0.140045	0.133826	0.16378	0.128658	0.158783	0.167491	0.168463	0.170104	0.173277	0.156865	0.158616	0.185517	0.178905	0.194002	0.172364	0.165631	0.181831	0.198968	0.188527	0.19685	0.189381	0.193675	0.170213	0.176385	0.174837	0.192692
Carbon fixation in photosynthetic organisms	0.277753	0.2861	0.188709	0.228775	0.208226	0.166527	0.215009	0.188479	0.236554	0.223333	0.22454	0.196602	0.168403	0.217988	0.212848	0.221476	0.226012	0.240578	0.214445	0.207799	0.227802	0.218314	0.214353	0.212318	0.226366	0.221001	0.190131	0.204572	0.225615	0.205552	0.184046	0.215674	0.20465	0.227074	0.2201	0.229866	0.229636	0.22186	0.226812	0.221506	0.207195	0.208041	0.21014	0.227416	0.229723	0.203606	0.226394	0.221604	0.215833
Valine, leucine and isoleucine biosynthesis	0.138502	0.0888979	0.0532828	0.0795385	0.0781441	0.209691	0.218477	0.227848	0.158871	0.247159	0.241955	0.223451	0.37829	0.0964025	0.17557	0.236872	0.291808	0.205715	0.230018	0.201266	0.219977	0.248249	0.226032	0.237985	0.226803	0.216895	0.22145	0.220777	0.214458	0.179058	0.222926	0.156388	0.213597	0.179476	0.197055	0.218408	0.219057	0.222652	0.223191	0.235708	0.212281	0.220967	0.220664	0.17869	0.16834	0.198635	0.184818	0.191864	0.17592
Cyanoamino acid metabolism	0.0564606	0.104988	0.0899166	0.110515	0.0942909	0.114913	0.129454	0.0993089	0.175146	0.300519	0.17316	0.175256	0.31663	0.118638	0.188722	0.1421	0.219934	0.262071	0.16079	0.206632	0.270378	0.224609	0.202606	0.169253	0.125582	0.187003	0.132456	0.22203	0.161035	0.163512	0.150225	0.162642	0.197003	0.173776	0.211501	0.221577	0.21859	0.188127	0.204695	0.187521	0.186302	0.175621	0.191457	0.179521	0.224684	0.188956	0.199112	0.200637	0.244043
Streptomycin biosynthesis	0.123315	0.112984	0.21059	0.191434	0.201647	0.12094	0.110847	0.150208	0.15878	0.205179	0.300485	0.191913	0.226852	0.135121	0.197911	0.158328	0.209184	0.199653	0.198661	0.223026	0.212381	0.240147	0.16642	0.162355	0.175862	0.203969	0.166669	0.237384	0.227135	0.217865	0.179266	0.190309	0.190033	0.193861	0.178203	0.197841	0.189547	0.21601	0.1995	0.199177	0.21816	0.21474	0.182994	0.225279	0.206304	0.203087	0.19377	0.19103	0.255146
Sphingolipid metabolism	0.0792668	0.102839	0.0687319	0.200483	0.175351	0.186889	0.299567	0.132601	0.191723	0.320077	0.209834	0.23893	0.221399	0.105856	0.219329	0.171814	0.240689	0.243896	0.195777	0.274603	0.286505	0.289656	0.219724	0.170915	0.247546	0.238435	0.18331	0.277304	0.195516	0.219399	0.205112	0.167742	0.232133	0.168579	0.249168	0.292193	0.239637	0.250884	0.221619	0.289986	0.20959	0.262508	0.199554	0.222173	0.237052	0.199887	0.217854	0.229721	0.237637
Glutathione metabolism	0.194298	0.159507	0.271799	0.253901	0.260015	0.310015	0.291291	1.23724	0.268643	0.230103	0.247372	0.252377	0.308235	0.182504	0.208673	0.248495	0.181413	0.18949	0.183895	0.259468	0.168553	0.179229	0.202085	0.194234	0.305614	0.240248	0.296565	0.170997	0.162293	0.30104	0.230865	0.255104	0.224951	0.188105	0.169053	0.168922	0.185816	0.171474	0.228116	0.171242	0.242131	0.218802	0.249777	0.237113	0.185286	0.236637	0.262054	0.235333	0.202067
RNA transport	0.112495	0.16265	0.257179	0.224063	0.247012	0.209811	0.0844508	0.0944923	0.24576	0.193012	0.189653	0.175715	0.0384413	0.227946	0.25712	0.237772	0.219978	0.244991	0.266244	0.255327	0.28272	0.215743	0.217592	0.219388	0.256474	0.265804	0.225482	0.278266	0.283512	0.268586	0.240939	0.249812	0.270268	0.284458	0.254578	0.244081	0.216373	0.280794	0.223827	0.306308	0.257931	0.250338	0.208464	0.277519	0.281778	0.240576	0.254628	0.232543	0.300116
Epithelial cell signaling in Helicobacter pylori infection	0.103309	0.0696981	0.10807	0.150405	0.164244	0.123692	0.207825	0.133656	0.113576	0.20744	0.248143	0.285268	0.21437	0.280848	0.184128	0.182139	0.195589	0.229263	0.25165	0.169149	0.226399	0.274218	0.305	0.277798	0.205616	0.219729	0.224087	0.303056	0.257252	0.201811	0.260628	0.271373	0.238826	0.239163	0.289466	0.285333	0.234867	0.272001	0.217691	0.302444	0.291941	0.266559	0.302763	0.291289	0.251386	0.241775	0.272676	0.236974	0.274727
Vitamin B6 metabolism	0.110922	0.124242	0.0587014	0.101702	0.0826817	0.369279	0.192396	0.222904	0.237699	0.293087	0.31956	0.269774	0.589865	0.179445	0.221188	0.271255	0.262226	0.205901	0.237449	0.283572	0.284734	0.364768	0.399681	0.298436	0.334355	0.281289	0.201155	0.253326	0.275215	0.229603	0.252291	0.234661	0.294715	0.259156	0.273951	0.240345	0.244305	0.309069	0.317818	0.301424	0.352907	0.273591	0.250737	0.244832	0.239248	0.236432	0.292311	0.242005	0.281052
Photosynthesis	0.167067	0.315909	0.348136	0.252403	0.439237	0.308297	0.227755	0.253989	0.401854	0.303088	0.342007	0.268409	0.290187	0.232844	0.322783	0.356782	0.472173	0.285701	0.297878	0.320701	0.345574	0.314981	0.349845	0.343919	0.391203	0.345946	0.273836	0.360987	0.418696	0.311178	0.314118	0.307844	0.412065	0.338282	0.268399	0.377567	0.310516	0.286485	0.316013	0.339001	0.307766	0.302035	0.280245	0.260336	0.257036	0.272846	0.28508	0.293809	0.318222
Vancomycin resistance	0.157316	0.10453	0.175637	0.214642	0.238723	0.279807	0.285538	0.232275	0.251686	0.237785	0.221843	0.234255	0.232758	0.345107	0.347506	0.271274	0.323761	0.262128	0.316292	0.266806	0.293311	0.283373	0.306093	0.338826	0.235202	0.272244	0.282494	0.285492	0.384276	0.250835	0.272224	0.276021	0.282575	0.276295	0.31959	0.270084	0.313694	0.353397	0.286843	0.306068	0.260741	0.27863	0.278777	0.256282	0.297292	0.290142	0.277246	0.329157	0.316823
Histidine metabolism	0.150624	0.128306	0.096634	0.169564	0.122448	0.0341399	0.136854	0.18886	0.255689	0.243319	0.25391	0.222148	0.216181	0.260311	0.25111	0.19323	0.245859	0.304001	0.298757	0.210691	0.293007	0.27513	0.310603	0.265069	0.251587	0.247613	0.287666	0.250545	0.237712	0.259747	0.254703	0.272332	0.320188	0.226674	0.33883	0.307136	0.266382	0.311262	0.249167	0.253668	0.280858	0.291346	0.265462	0.208889	0.297543	0.275928	0.227918	0.258402	0.243426
Biotin metabolism	0.180422	0.141847	0.250784	0.25285	0.250607	0.154581	0.1357	0.250828	0.272612	0.26703	0.310828	0.403088	0.168055	0.241228	0.271229	0.254989	0.238096	0.361722	0.311141	0.293048	0.317953	0.2804	0.263234	0.244955	0.184912	0.275834	0.265796	0.318873	0.292142	0.303761	0.32263	0.292573	0.346934	0.321014	0.327567	0.343964	0.298798	0.318525	0.290176	0.317789	0.356837	0.32029	0.334073	0.281546	0.328784	0.336726	0.295439	0.305383	0.265174
Biofilm formation - Vibrio cholerae	0.248515	0.182636	0.278199	0.223642	0.221086	0.0764494	0.257514	0.392266	0.139475	0.318667	0.268827	0.293169	0.145616	0.377071	0.314671	0.179149	0.150788	0.222215	0.221414	0.278295	0.248064	0.217767	0.151791	0.193742	0.19188	0.219111	0.309634	0.266116	0.219265	0.341827	0.33109	0.302678	0.279898	0.302682	0.258129	0.241321	0.28845	0.221261	0.231876	0.224313	0.285588	0.313536	0.32357	0.37718	0.267438	0.242577	0.247005	0.241925	0.242787
Sulfur metabolism	0.14526	0.209521	0.124494	0.122919	0.137621	0.196099	0.213884	0.273899	0.182156	0.182607	0.17982	0.178261	0.12695	0.173308	0.225042	0.160558	0.178761	0.262354	0.248415	0.215372	0.245797	0.178872	0.21598	0.211839	0.176113	0.196442	0.168668	0.210939	0.272424	0.231737	0.270661	0.331195	0.294312	0.276264	0.185959	0.273615	0.258349	0.249671	0.21589	0.261585	0.196443	0.233455	0.281746	0.222763	0.190199	0.191404	0.215504	0.202843	0.163937
Bacterial chemotaxis	0.00878065	0.152873	1	0.040503	0.0672308	0.0968928	0.270093	0.0884773	0.189628	0.171528	0.177045	0.155322	0.0433468	0.232878	0.245305	0.126124	0.245922	0.15614	0.157935	0.19031	0.179117	0.264978	0.15746	0.201712	0.0843027	0.218751	0.162891	0.369395	0.473348	0.376096	0.443385	0.471717	0.528838	0.471243	0.345635	0.369738	0.227948	0.21661	0.257315	0.300533	0.173158	0.225069	0.206404	0.206822	0.198299	0.166724	0.144903	0.174488	0.12902
Bacterial invasion of epithelial cells	1	1	1	1	1	0.00366928	0.0133403	0.0134386	1	0.0155943	0.0275582	0.0188142	1	0.0159503	0.00363579	1	0.00454566	0.00876852	0.0490592	0.00142235	0.00274701	1	1	0.0337683	0.0684184	0.000511345	0.0105343	0.018026	0.0121799	0.0302961	0.0403922	0.0200115	0.00519657	0.00552513	0.0165777	0.0108188	0.0374224	0.0108486	0.00371142	0.00616244	0.0102495	0.11877	0.0338092	0.0299213	0.00453992	0.0292533	0.00272494	0.000393492	0.0078022
Linoleic acid metabolism	1	1	1	0.00296346	0.00214117	1	1	0.00338888	0.000187855	0.000314849	0.000344126	0.00213549	0.000831216	0.00208631	6.46e-05	0.000212517	1	0.000397179	0.000572114	0.00150157	0.000700077	0.000134392	1	0.000305253	7.51e-05	0.000261453	1	0.000242888	0.000234161	0.000278226	0.000970522	0.00503988	0.000644462	0.000171692	0.000400677	0.00107792	0.00279496	0.000751309	0.00037125	0.000191978	0.00111635	0.00066147	0.00152437	0.00384975	0.000806108	0.000225248	0.000152911	0.00143422	0.000585497
alpha-Linolenic acid metabolism	1	1	0.00248178	0.0032387	0.0025117	0.000712519	0.000577884	0.00338888	0.000187855	0.000549632	0.000676404	0.00330072	0.00162577	0.00540537	6.46e-05	0.000212517	1	0.00110143	0.000623721	0.00150157	0.000700077	0.000134392	0.000423757	0.000305253	0.000347932	0.000611092	0.000193881	0.000242888	0.000234161	0.00064085	0.00229323	0.00660614	0.000644462	0.000171692	0.000484447	0.00146301	0.00194672	0.000804813	0.00037125	0.000342923	0.000837893	0.000993961	0.0028235	0.00303037	0.00136507	0.000686877	0.0004877	0.00225779	0.000724517
Geraniol degradation	1	1	0.00161042	0.000384371	0.000487035	0.000593912	0.00118071	0.00182072	1	0.00114259	0.00334179	0.00271904	0.00131801	0.00530074	1	0.000130933	1	0.00117494	0.00158036	0.000746542	4.16e-05	1	0.000655851	1	0.000923261	0.000751021	0.000638981	1	8.36e-05	0.000624132	0.00296932	0.00309841	0.000163456	0.00022133	0.000247819	0.00112281	0.00111744	0.000366659	0.00077079	0.000742208	0.0033147	0.000822111	0.00505523	0.00270264	0.00195257	0.00149221	0.00142798	0.00220308	0.000329869
Hepatocellular carcinoma	0.000112248	8.79e-05	0.00203255	0.00013593	0.000294889	0.00319828	0.000921406	0.0164515	0.000119661	0.0019448	0.00146984	0.00294115	0.00515711	0.000986003	0.00452527	0.0206295	0.000849278	0.000605513	0.0123846	0.00333848	0.00216672	0.000208665	0.000111662	0.0115809	0.0236442	0.00721685	0.0202379	0.00771612	0.00356432	0.0100783	0.0111935	0.0145449	0.00469955	0.00124947	0.00454293	0.00855696	0.00633503	0.00407146	0.00563219	0.00952462	0.00332405	0.011057	0.00736851	0.00439344	0.000939089	0.00824301	0.00410917	0.00165587	0.000699985
Chagas disease (American trypanosomiasis)	0.00370485	0.000964938	0.000465073	0.00109131	1	0.134188	0.0153493	0.0271751	0.0168188	0.0219789	0.0108327	0.00492153	0.0807662	0.00213867	1	1	0.0281347	0.00399161	0.00206824	0.0124697	0.00579112	0.0332416	0.0315705	0.0082447	0.00541778	0.0131789	0.00983667	0.00203642	0.00712704	0.00171174	0.00262448	0.00487137	0.00558583	0.00192037	0.000719805	0.00146639	0.00695449	0.0183694	0.0210329	0.000978171	0.00774847	0.00698768	0.00704982	0.00335573	0.00273948	0.00358873	0.0102183	0.00737961	0.0132734
African trypanosomiasis	0.00836745	0.000964938	0.00182972	0.0016929	1	0.141584	0.0196765	0.0271751	0.0168188	0.0219789	0.0317027	0.0268088	0.0807662	0.00359026	1	1	0.0281347	0.0234695	0.00206824	0.0124697	0.00579112	0.0332416	0.0339398	0.0082447	0.00541778	0.0158028	0.00983667	0.00294538	0.00712704	0.00171174	0.00262448	0.00487137	0.00558583	0.00192037	0.000719805	0.00146639	0.00695449	0.0183694	0.0210329	0.000978171	0.021221	0.00698768	0.00704982	0.00335573	0.00625101	0.00619656	0.0102183	0.00955309	0.0132734
Biosynthesis of unsaturated fatty acids	0.00873079	1	0.00898149	1	1	0.0204019	0.144308	0.0737842	0.0339297	0.0553918	0.0390553	0.0262474	0.206988	0.0243497	0.00101584	1	0.0963421	0.00726295	0.00403692	0.0375872	0.0167138	0.0611495	0.074222	0.0268246	0.0100017	0.0312666	0.0211223	0.00251526	0.00295405	0.0136779	0.0137629	0.0369284	0.0123906	0.00344705	0.00677249	0.00973797	0.0198931	0.0269406	0.0502267	0.00526857	0.016453	0.0290128	0.0354924	0.0263165	0.00682983	0.00871575	0.0268837	0.0322534	0.0129249
Ether lipid metabolism	1	0.0267167	0.000413835	0.00296346	0.0026537	1	0.00494	0.00338888	0.000187855	0.000314849	0.000344126	0.00241762	0.000831216	0.005082	0.00142825	0.00170543	0.00141797	0.000880498	0.00159345	0.00150157	0.00208253	0.00123129	0.0034646	0.00415731	7.51e-05	0.00193867	0.000123964	0.001681	0.00779141	0.00126617	0.00120599	0.00644266	0.00252062	0.00243787	0.00251795	0.00215901	0.0022704	0.00161343	0.00271098	0.00164999	0.00515009	0.00197026	0.00414095	0.00606438	0.00127954	0.000638816	0.00202699	0.00334325	0.00193848
Cushing syndrome	0.00986721	0.00637479	0.0022248	0.00103919	0.00126499	0.00440114	0.00348157	0.0140145	0.00764661	0.00242011	0.00180539	0.000772212	0.000218928	0.000981192	0.00205581	0.00183134	0.000168177	0.000171754	0.000281895	0.00369803	0.000835308	0.000798202	0.00127875	0.000853767	0.00103997	0.00204433	0.00338002	0.000347157	0.000344927	0.00310264	0.00302437	0.00493171	0.000874857	0.00394019	0.00138334	0.00139995	0.00176127	0.00134914	0.00290155	0.000546295	0.00175393	0.000927776	0.00431408	0.00337308	0.00393275	0.00277357	0.00554305	0.00380995	0.00307106
Renal cell carcinoma	0.00986721	0.00637479	0.0022248	0.00103919	0.00126499	0.00440114	0.00348157	0.0140145	0.00764661	0.00242011	0.00180539	0.000772212	0.000218928	0.000981192	0.00205581	0.00183134	0.000168177	0.000171754	0.000281895	0.00369803	0.000835308	0.000798202	0.00127875	0.000853767	0.00103997	0.00204433	0.00338002	0.000347157	0.000344927	0.00310264	0.00302437	0.00493171	0.000874857	0.00394019	0.00138334	0.00139995	0.00176127	0.00134914	0.00290155	0.000546295	0.00175393	0.000927776	0.00431408	0.00337308	0.00393275	0.00277357	0.00554305	0.00380995	0.00307106
Pertussis	0.00114327	0.0952297	1	0.0109903	0.00368185	0.000100869	0.0779438	0.0260281	0.0016054	0.0538572	0.0736862	0.167965	0.0600942	0.0463392	0.0109108	0.0187232	0.00242611	0.0470709	0.0146157	0.0354312	0.0215037	0.0227495	0.00921313	0.00262226	0.0239183	0.0111485	0.0635845	0.0143065	0.0230414	0.0927766	0.123459	0.175972	0.0111962	0.0136895	0.0314526	0.0460211	0.0963521	0.0194192	0.0124946	0.0103924	0.0674038	0.0494644	0.0791886	0.0798329	0.028399	0.0122731	0.0087434	0.00990102	0.0167839
MAPK signaling pathway - yeast	0.000228494	1	0.000902869	0.00109101	0.000770913	1	0.00354027	0.00401092	0.000243165	0.00187712	0.00037405	0.000571823	0.000268485	0.00130247	0.000970094	0.000364736	7.06e-05	0.000912454	0.000257467	0.00134923	0.000511794	0.00018864	0.000633261	0.000287626	0.000687317	0.000484294	0.00153831	0.000275508	0.000451314	0.00129682	0.00135334	0.0021803	0.00101125	0.00068567	0.00277769	0.00182512	0.000587332	0.00099002	0.00107794	0.000699874	0.00158233	0.00310855	0.00266026	0.00232839	0.00222035	0.00227415	0.000643725	0.00200981	0.000477559
Amyotrophic lateral sclerosis (ALS)	0.000228494	1	0.00591068	0.00182907	0.00350108	0.000525838	0.00416852	0.0102573	0.000243165	0.00258026	0.000556106	0.00200157	0.000581863	0.00175682	0.000970094	0.00140525	0.00086641	0.000912454	0.000257467	0.00134923	0.000511794	0.00018864	0.00148223	0.000572275	0.00156557	0.000612291	0.00473042	0.000527705	0.000847589	0.00310442	0.00549637	0.00382906	0.00545666	0.000956085	0.00798771	0.00187211	0.00127531	0.00184731	0.00115056	0.000936323	0.00244168	0.00416003	0.00385237	0.00470089	0.00383968	0.00677683	0.00141961	0.00412792	0.00106452
Drug metabolism - cytochrome P450	0.00940208	0.00589459	0.0125895	0.00603684	0.00557004	0.016538	0.00392767	0.014994	0.017383	0.00324087	0.0014153	0.0110341	0.00514229	0.00171259	0.00538646	0.00777152	0.000523598	0.00723518	0.00444493	0.00123939	0.00207555	0.00431912	0.000495431	0.00460016	0.00645174	0.00444579	0.0108309	0.00263338	0.00242943	0.00629685	0.00492772	0.0100966	0.00329014	0.00173008	0.00411444	0.0045468	0.00345674	0.00408424	0.00281982	0.00381592	0.00327448	0.00501993	0.0071842	0.00590581	0.00253854	0.00471948	0.00416215	0.00365381	0.000838497
Metabolism of xenobiotics by cytochrome P450	0.00940208	0.00589459	0.0110265	0.010235	0.00557004	0.016538	0.00392767	0.014994	0.017383	0.00324087	0.0014153	0.0110341	0.00514229	0.00171259	0.00538646	0.00777152	0.000523598	0.00723518	0.00539737	0.00123939	0.00207555	0.00431912	0.000495431	0.00460016	0.00645174	0.00444579	0.01065	0.00263338	0.00348738	0.00664188	0.00599491	0.0100966	0.00329014	0.00173008	0.00522253	0.0045468	0.00345674	0.00550109	0.00332679	0.00381592	0.00312989	0.00501993	0.0071842	0.00798157	0.00253854	0.00471948	0.00416215	0.00406512	0.000838497
Flavone and flavonol biosynthesis	1	1	1	1	0.00254293	0.00105132	0.00311449	1	0.0102846	0.00963555	0.0038903	0.00559482	0.000517395	0.000826142	0.00441066	0.00236972	0.00190751	0.0112733	0.0035271	0.00665033	0.00705037	0.00428025	0.000783107	0.00208417	0.00132134	0.00357948	0.000945475	0.0026607	0.00203132	0.00387944	0.00597747	0.00415286	0.00345864	0.00325516	0.00405581	0.00572469	0.00454908	0.0075053	0.00317924	0.00319812	0.00248447	0.00351629	0.00455098	0.00656321	0.00457739	0.00550623	0.0069018	0.0101291	0.0042022
N-Glycan biosynthesis	1	1	0.0138774	0.00853437	0.00639951	0.0189288	0.0100473	0.0290841	0.00478598	0.015971	0.0234642	0.0145591	0.00270363	0.0170246	0.0150977	0.0127456	0.00475193	0.017089	0.0157534	0.00881225	0.019289	0.0288226	0.0115106	0.0053145	0.00696435	0.0128044	0.00675778	0.0166387	0.0147923	0.0212473	0.0123471	0.0185682	0.0188108	0.017257	0.0240613	0.0227649	0.0168529	0.0188924	0.0122408	0.0175167	0.0168372	0.0217757	0.0160522	0.0209253	0.0194071	0.0143778	0.0109121	0.0209215	0.0241275
Dioxin degradation	0.039821	0.0284409	0.0142498	0.0348959	0.0233115	0.0255999	0.0035474	0.00425765	0.021453	0.0120834	0.014636	0.0171671	0.00195005	0.0122614	0.0185984	0.023085	0.00199047	0.0206295	0.0213292	0.0169154	0.00829235	0.00461567	0.00383854	0.0193974	0.0374711	0.0124282	0.0342816	0.0107413	0.0114223	0.0202588	0.0179629	0.0183235	0.0157976	0.0203773	0.00998513	0.0216306	0.0119595	0.0132066	0.0110775	0.0186101	0.00918402	0.0164227	0.0139052	0.0119676	0.00662576	0.0196132	0.0170743	0.0128697	0.0067842
Xylene degradation	0.0847014	0.058126	0.0319744	0.0503601	0.0395192	0.0283103	0.0035474	0.00930071	0.0284008	0.0129165	0.0152607	0.0172526	0.0030493	0.0124888	0.0234764	0.0351298	0.00224929	0.0207214	0.0265185	0.0177472	0.00943791	0.00493822	0.00383854	0.0258462	0.0508924	0.015915	0.0392026	0.0111757	0.0124653	0.0247381	0.0223324	0.0211516	0.0185459	0.0248366	0.0127244	0.0260646	0.0142884	0.0144511	0.012794	0.0239716	0.01031	0.0198731	0.0168649	0.0142433	0.00706255	0.0231793	0.0191948	0.0136897	0.00814203
Salmonella infection	0.00106459	1	1	0.00712565	0.00764351	0.00977323	0.0469789	0.0252551	0.00240318	0.0210714	0.0147197	0.0387818	0.0197534	0.0513145	0.0151759	0.00631727	0.00333649	0.0152721	0.0041243	0.013871	0.00895649	0.0113694	0.0221169	0.0104362	0.0138354	0.00769803	0.0161431	0.00947921	0.0121584	0.0345167	0.0610407	0.0730926	0.0369893	0.0190943	0.0171067	0.0460544	0.0343095	0.00872199	0.0195834	0.0123907	0.0225501	0.0214896	0.0427397	0.0420912	0.0178214	0.016017	0.0104133	0.0109075	0.0103569
Phospholipase D signaling pathway	0.000186778	1	0.000413835	0.00212203	0.000735279	1	0.00196542	0.00487791	0.00101704	0.00401866	0.00069781	0.00243904	0.000672889	0.00428478	0.00443862	0.00174568	0.00187195	0.00499477	0.00638914	0.00249315	0.00538509	0.00196069	0.00233648	0.00437322	0.00203615	0.0039078	0.00139255	0.00224482	0.00127439	0.0038341	0.00388007	0.00916641	0.00735086	0.00676073	0.0049731	0.00339617	0.00411387	0.00393606	0.00342166	0.00465594	0.00463876	0.00593296	0.00340518	0.00347823	0.00474049	0.00216673	0.00436852	0.00450255	0.00325461
Choline metabolism in cancer	0.000186778	1	0.00127572	0.00583678	0.00266391	1	0.00260625	0.00487791	0.00124236	0.00421947	0.000928562	0.00257565	0.000672889	0.00428478	0.00481863	0.00220365	0.00187195	0.00533661	0.00722244	0.00455896	0.00624994	0.00217024	0.00233648	0.00437322	0.00237318	0.00466881	0.00139255	0.00265888	0.00161143	0.0038341	0.00430319	0.0128185	0.00766519	0.00676073	0.0057167	0.00474521	0.0044121	0.00467065	0.0041818	0.00625196	0.00501857	0.00722124	0.00517317	0.00555361	0.00581391	0.00238226	0.00451618	0.00601002	0.00353499
D-Arginine and D-ornithine metabolism	0.0808495	0.0704018	1	0.00100983	0.00520108	1	0.00230844	0.00726286	0.000527577	0.00543496	0.000730365	0.000977318	0.00320577	0.00287988	0.00511829	0.013292	0.0018611	0.00259436	0.00429349	0.00655909	0.00525432	0.00365976	0.00736784	0.0242824	0.00315894	0.0118588	0.00825753	0.0039567	0.00284402	0.0065312	0.00664022	0.00648221	0.0015095	0.00631369	0.01152	0.00355286	0.000804969	0.00423143	0.00699094	0.00083908	0.00645435	0.00615074	0.00407987	0.00403346	0.00578051	0.0215984	0.0186112	0.0157547	0.0116731
Nonribosomal peptide structures	0.0588059	0.0421758	0.0459203	0.035959	0.0462271	0.00565271	0.0118203	0.00167505	0.0394974	0.0205655	0.000973294	0.00752567	0.0435582	0.0358357	0.0239821	0.0113346	0.00558737	0.00734597	0.0140459	0.0537296	0.0157295	0.0227836	0.0175922	0.0142773	0.00572761	0.0108443	0.0519335	0.00820132	0.002281	0.0167546	0.0118664	0.0142131	0.0341623	0.0304406	0.0134139	0.00479008	0.0137042	0.0195476	0.0350814	0.0031094	0.0173561	0.0155095	0.0236459	0.0214869	0.0260242	0.0240342	0.0502524	0.0390793	0.0280685
Arabinogalactan biosynthesis - Mycobacterium	0.0412277	0.0266976	0.0452541	0.0423871	0.0418767	0.102969	0.108844	0.160484	0.0206299	0.060257	0.0376282	0.050698	0.069112	0.0285918	0.0223703	0.0480395	0.035972	0.0428023	0.0327319	0.0419813	0.0160059	0.0409037	0.0365984	0.0487996	0.0619566	0.0363955	0.0666376	0.0322922	0.00937853	0.036305	0.0363975	0.0319278	0.0159749	0.0242003	0.0181628	0.0233312	0.0277168	0.0351405	0.0674061	0.0339085	0.0357082	0.0323749	0.051688	0.0295166	0.0288148	0.0349353	0.0610404	0.0508904	0.0256155
Retinol metabolism	0.00940208	0.00688497	0.00956259	0.00967449	0.00557004	0.0182889	0.0213993	0.085474	0.0183837	0.0261583	0.00336678	0.0132693	0.00150452	0.0054593	0.0150748	0.00980402	0.00359456	0.011088	0.00724654	0.00373748	0.00685656	0.00471378	0.00669629	0.00870313	0.00952794	0.0133438	0.01065	0.00834618	0.0029718	0.00846432	0.011581	0.00356476	0.00639832	0.00277306	0.0212162	0.00923203	0.00576051	0.00377096	0.00676427	0.00742403	0.0169185	0.0152151	0.0165768	0.00523698	0.0127617	0.0247809	0.00497343	0.00771928	0.00939562
Styrene degradation	0.0510429	0.0332068	0.0300656	0.0302959	0.0309968	0.00379731	0.00750887	0.0174645	0.0226217	0.00272018	0.0179023	0.00484461	0.00223	0.00645469	0.00635365	0.0200651	0.00328773	0.00239308	0.00624105	0.00764153	0.00221665	0.00204366	0.0038244	0.0140519	0.0220767	0.0097228	0.00788409	0.0112163	0.0042156	0.00850581	0.0122629	0.0118302	0.00750665	0.00404035	0.00478369	0.0114437	0.00861309	0.00532136	0.00590254	0.0113019	0.00846839	0.00935126	0.0238968	0.00719548	0.013623	0.012201	0.0109915	0.00856657	0.00911939
Chlorocyclohexane and chlorobenzene degradation	0.0517078	0.0363748	0.038287	0.0341844	0.0374998	0.00546403	0.00767843	0.0105099	0.0239812	0.011972	0.00241235	0.00546027	0.00358002	0.0312478	0.00714424	0.0124146	0.00548449	0.00646719	0.00690869	0.0161372	0.0073015	0.0112594	0.00477576	0.0124341	0.0150663	0.0105678	0.00790093	0.0108847	0.0199546	0.0114501	0.0106753	0.0146038	0.00914216	0.011266	0.00820051	0.0102043	0.00932968	0.00601652	0.0111625	0.0124216	0.00984586	0.00968352	0.0106855	0.0176431	0.0174912	0.0120746	0.0172527	0.0115597	0.013114
Insect hormone biosynthesis	0.00044015	1	0.00166681	0.00119692	0.000944563	0.000794118	0.0006895	1	0.00243741	0.000985519	0.000920091	0.000529954	0.000995576	0.00119789	0.000826014	0.000721944	0.00163853	0.000906744	0.00126848	0.00168367	0.00180667	0.00199286	0.00294287	0.00144962	0.000733834	0.00133909	0.00158382	0.00234544	0.0027904	0.000740213	0.00171171	0.00218919	0.0012887	0.000557011	0.00278923	0.00165557	0.00100351	0.00169239	0.00168523	0.00150008	0.00154219	0.000995306	0.00165361	0.00110116	0.00284002	0.00294556	0.00202492	0.0029911	0.00191076
Limonene and pinene degradation	0.00044015	1	0.00353765	0.0017173	0.00642404	0.00455844	0.00336659	0.00132405	0.00243741	0.00185943	0.00210709	0.00147593	0.00151903	0.00240679	0.00209048	0.00123053	0.00288856	0.00156118	0.00203043	0.00173045	0.00180667	0.00922043	0.00303382	0.00230266	0.00127904	0.00133909	0.00158382	0.00234544	0.00408911	0.00228098	0.00254513	0.00727641	0.00269261	0.00117134	0.00632278	0.00333331	0.00283919	0.00388113	0.00297155	0.00304704	0.00204532	0.0027656	0.00500012	0.00653196	0.00632763	0.00481808	0.00233897	0.00700072	0.00321127
Various types of N-glycan biosynthesis	0.0111921	1	0.00544854	0.0194193	0.0220439	0.0125793	0.0651877	0.0169458	0.00655078	0.0407644	0.0243763	0.00916631	0.00632305	0.0121159	0.0240703	0.0270617	0.0111883	0.0296526	0.0305887	0.0226822	0.0308311	0.0191876	0.0177312	0.0178785	0.0167086	0.0224179	0.0251856	0.0227384	0.00889789	0.0301356	0.0243019	0.0150609	0.028705	0.0175008	0.0435326	0.0372352	0.0280624	0.0276584	0.0247242	0.0344346	0.0297193	0.0399553	0.0257851	0.0245781	0.0286598	0.0405879	0.0259004	0.0338248	0.0275629
Glycosphingolipid biosynthesis - ganglio series	0.0111921	1	1	0.0194193	0.0220439	0.0117936	0.0651877	0.0169458	0.00655078	0.0407644	0.0243763	0.00916631	0.00632305	0.0116447	0.0240703	0.0270617	0.0111883	0.0296526	0.0305887	0.0226822	0.0308311	0.0191876	0.0173037	0.0178785	0.0167086	0.0222985	0.0251856	0.0227384	0.00889789	0.0301356	0.0243019	0.0150609	0.028705	0.0175008	0.0435326	0.0372352	0.0280624	0.0276584	0.0247242	0.0344346	0.0297193	0.0399553	0.0257851	0.0245781	0.0286598	0.0405207	0.0259004	0.0338248	0.0273652
Autophagy - yeast	0.0108678	0.00345346	0.00469618	0.0092491	0.0157563	0.0565035	0.14977	0.158067	0.213421	0.0731981	0.0474386	0.00926817	0.213138	0.0208427	0.0233765	0.013327	0.111877	0.0148978	0.00455248	0.0633058	0.0597575	0.111745	0.160755	0.0562326	0.0205153	0.0707757	0.0529449	0.027273	0.0244369	0.0304046	0.0264112	0.0428455	0.0789499	0.0409776	0.0360726	0.0359195	0.0360101	0.0785283	0.0752601	0.0165018	0.0300449	0.0350325	0.0377458	0.040575	0.0623141	0.0536027	0.060555	0.0845858	0.0653394
FoxO signaling pathway	0.0104019	0.00808022	0.0174846	0.0165799	0.0147327	0.0289957	0.0403746	0.0350434	0.000887075	0.00771263	0.00797731	0.0121321	0.00215583	0.00770631	0.00491578	0.0112962	0.00156317	0.0143622	0.0125466	0.00654027	0.0114912	0.00605628	0.00406387	0.00876328	0.00588432	0.00797647	0.0162766	0.00281373	0.00379163	0.0107723	0.0133631	0.0152227	0.00863055	0.00465718	0.0174785	0.0103753	0.0113141	0.00895372	0.00717423	0.0117183	0.0160863	0.0164013	0.0141114	0.0112093	0.0119728	0.0107449	0.00722418	0.00819366	0.0041833
Amoebiasis	0.0313714	0.0199692	0.000821863	0.0246631	0.00435372	0.000928306	0.0161837	0.00641688	0.0134881	0.0234966	0.0559625	0.0343749	0.00155151	0.124552	0.0373315	0.011018	0.0201565	0.0375632	0.0412585	0.0290417	0.0591139	0.0134983	0.0138092	0.0253509	0.0120762	0.0200117	0.0158714	0.0530308	0.0751989	0.0296386	0.0183064	0.0526611	0.0176773	0.0286767	0.020837	0.0320264	0.0524422	0.0357177	0.0268757	0.0404485	0.0427953	0.026778	0.0156131	0.0313523	0.0306091	0.0243094	0.0216514	0.0437332	0.0551445
Biosynthesis of siderophore group nonribosomal peptides	0.000762158	0.000458375	0.000118749	0.0119516	0.00128004	0.0155651	0.0355204	0.0561806	0.125793	0.00531784	0.0303854	0.0854426	0.00655522	0.02043	0.0189998	0.00313537	0.0103349	0.0414209	0.0729078	0.0650474	0.0179294	0.0199928	0.00825323	0.0167216	0.0124398	0.0100189	0.0144993	0.0219856	0.070148	0.0793521	0.0703348	0.016795	0.0440632	0.0232253	0.00364146	0.0484746	0.0621011	0.0112306	0.00854438	0.0878249	0.026817	0.0514885	0.0631062	0.0442869	0.0409924	0.0602429	0.0179814	0.0410941	0.00749029
MAPK signaling pathway - fly	0.0101734	0.00802418	0.0165503	0.0148974	0.0135298	0.0192354	0.0272359	0.0247004	0.000643909	0.00573003	0.00760325	0.0115602	0.00188735	0.00561824	0.00370699	0.0109315	0.00121671	0.0132545	0.0121877	0.00519105	0.0106139	0.00554962	0.00328217	0.00762868	0.00489318	0.00732014	0.0147383	0.00249645	0.00224676	0.00936961	0.0118303	0.0125764	0.0076193	0.00329378	0.0135803	0.00819242	0.0102367	0.00747649	0.00526496	0.0103198	0.0138321	0.012602	0.0102417	0.00759725	0.00849298	0.00825113	0.00635216	0.00573722	0.00201465
Huntington disease	0.0121499	0.00835357	0.143971	0.0162972	0.0162972	0.0292	0.0286304	0.0387038	0.000643909	0.00643317	0.00808216	0.0131428	0.00220073	0.00685979	0.00396821	0.0123899	0.00201253	0.0132545	0.0121877	0.00519105	0.0106139	0.00554962	0.00442994	0.00791333	0.00577143	0.00744814	0.0484851	0.00274865	0.00264303	0.0111772	0.0162518	0.0142251	0.0120647	0.00356419	0.0187903	0.00823941	0.0109247	0.00942032	0.00533757	0.0105563	0.0146914	0.0136534	0.0114338	0.00996975	0.0101123	0.0127538	0.00712804	0.00785533	0.00260161
Longevity regulating pathway	0.0104019	0.00802418	0.0174532	0.0159884	0.0143007	0.0192354	0.0307762	0.0287113	0.000887075	0.00760715	0.00797731	0.0121321	0.00215583	0.00692072	0.00467709	0.0112962	0.00128729	0.0141669	0.0124452	0.00654027	0.0111256	0.00573826	0.00391543	0.00791631	0.0055805	0.00780444	0.0162766	0.00277196	0.00269807	0.0106664	0.0131836	0.0147567	0.00863055	0.00397945	0.016358	0.0100175	0.010824	0.00846651	0.0063429	0.0110197	0.0154144	0.0157105	0.0129019	0.00992564	0.0107133	0.0105253	0.00699589	0.00774703	0.0024922
Staphylococcus aureus infection	0.145889	0.105547	0.317471	0.262238	0.275142	0.338503	0.0407287	0.0615308	0.112865	0.0536431	0.0402517	0.0751307	0.000241701	0.00510834	0.0806444	0.172049	0.00507896	0.0602119	0.129791	0.0745118	0.026721	0.00716908	0.00653954	0.0995704	0.237706	0.0701228	0.209568	0.0895981	0.0345523	0.104194	0.0956631	0.0385421	0.0384063	0.0481916	0.0369619	0.0480305	0.0446212	0.0398848	0.0570433	0.0594946	0.0890853	0.0985429	0.0518835	0.0435499	0.0271811	0.104406	0.0930255	0.0428988	0.0321268
Caprolactam degradation	1	1	0.00187084	0.000721014	0.00556161	0.00376432	0.00403234	0.00132405	0.000345093	0.00104637	0.001187	0.000945979	0.00052346	0.00125796	0.00139301	0.00149165	0.00203296	0.000930278	0.00332994	0.000252539	0.000157154	0.00802104	0.00123215	0.000951658	0.00132511	0.000534411	0.000298609	0.000744628	0.00304529	0.00220874	0.00103802	0.00660829	0.00170842	0.000653143	0.00517869	0.00270297	0.00243892	0.00262339	0.00211578	0.0025539	0.0015665	0.00223779	0.00410177	0.00658962	0.00457654	0.00426744	0.00144242	0.00540478	0.00236027
Biofilm formation - Pseudomonas aeruginosa	0.0524444	0.0301401	0.0154469	0.0147298	0.0309462	0.0481715	0.164976	0.171364	0.167021	0.0973066	0.2207	0.232371	0.277666	0.120302	0.0701902	0.142023	0.295779	0.189269	0.0649107	0.14488	0.124876	0.106407	0.212082	0.138466	0.139198	0.134243	0.109139	0.165835	0.202114	0.185515	0.149553	0.221325	0.135607	0.116841	0.0848774	0.128524	0.173054	0.11956	0.194401	0.125937	0.128043	0.111524	0.143798	0.107882	0.0847433	0.0950503	0.0926403	0.0766598	0.0917465
Ascorbate and aldarate metabolism	0.232163	0.179144	0.208063	0.228179	0.248105	0.0501345	0.0924789	0.044031	0.187812	0.147411	0.194003	0.301755	0.108652	0.0800705	0.130864	0.0520805	0.125521	0.208069	0.128442	0.168938	0.119956	0.129948	0.126092	0.0950672	0.0850915	0.116632	0.0971189	0.103049	0.11789	0.173962	0.128756	0.107419	0.152473	0.126218	0.0878552	0.1244	0.135923	0.157728	0.111755	0.0834463	0.116115	0.123729	0.11983	0.140057	0.101663	0.141693	0.128762	0.129962	0.0965639
Phenylalanine metabolism	0.0981635	0.0562769	0.0171164	0.0851112	0.0536355	0.0775752	0.1185	0.129968	0.0829228	0.135409	0.0778074	0.0527375	0.0581311	0.134928	0.117646	0.130521	0.0823373	0.10868	0.178627	0.101393	0.123997	0.104496	0.0825383	0.0983584	0.12433	0.13127	0.1073	0.097607	0.0862942	0.156276	0.127487	0.198704	0.123424	0.128211	0.126505	0.133768	0.155176	0.11708	0.111042	0.125117	0.141567	0.143217	0.132594	0.10019	0.140541	0.154757	0.133716	0.125974	0.0942493
Phosphonate and phosphinate metabolism	0.126262	0.0693036	0.0550974	0.10189	0.0984912	0.0049355	0.0622838	0.0295105	0.0624368	0.0952348	0.13224	0.10836	0.0808378	0.137761	0.0988487	0.0876157	0.0716635	0.134071	0.110356	0.0675373	0.116514	0.151149	0.112096	0.0880738	0.0510959	0.112208	0.087526	0.101388	0.116437	0.0916347	0.121317	0.137946	0.101513	0.111768	0.174721	0.144507	0.114825	0.110625	0.0985235	0.114776	0.126714	0.12685	0.138742	0.165872	0.159358	0.135992	0.098556	0.145436	0.159491
Ubiquinone and other terpenoid-quinone biosynthesis	0.115846	0.0704998	0.0844033	0.0667875	0.0572913	0.166789	0.154555	0.327362	0.0638134	0.0864201	0.14555	0.112572	0.0863218	0.11347	0.0974335	0.0933836	0.0403435	0.0541402	0.0467984	0.090627	0.0764246	0.0767394	0.079415	0.0433117	0.0831898	0.082845	0.0917719	0.0782259	0.069252	0.151087	0.127225	0.133472	0.0763215	0.124101	0.125132	0.0965107	0.0821793	0.069384	0.0966949	0.0762439	0.106731	0.113943	0.119913	0.160318	0.135406	0.115294	0.116333	0.103956	0.11508
Riboflavin metabolism	0.0564813	0.119857	0.103906	0.133276	0.113389	0.104145	0.0869575	0.117084	0.130605	0.177624	0.243188	0.248502	0.154792	0.138123	0.167391	0.178555	0.130803	0.184601	0.139874	0.185996	0.139053	0.15106	0.158121	0.115149	0.139646	0.146446	0.170244	0.149849	0.180077	0.182095	0.173437	0.176299	0.177298	0.170237	0.12567	0.172774	0.136499	0.146236	0.144639	0.191381	0.223992	0.172128	0.152545	0.206906	0.143617	0.146153	0.159486	0.144976	0.180987
Polyketide sugar unit biosynthesis	0.0778669	0.0541273	0.0973077	0.113798	0.111814	0.0500234	0.0704534	0.0938287	0.106695	0.140958	0.236432	0.142178	0.123723	0.0712966	0.145208	0.123728	0.177735	0.136111	0.143364	0.155722	0.153851	0.159843	0.0979206	0.109512	0.125158	0.13861	0.117657	0.185601	0.178801	0.157332	0.137028	0.13155	0.136107	0.136786	0.119996	0.140098	0.126234	0.158432	0.130594	0.142995	0.161413	0.161856	0.128755	0.169291	0.149148	0.144233	0.132443	0.133688	0.192023
NOD-like receptor signaling pathway	0.0543263	0.0946787	0.0638281	0.0994054	0.0789123	0.0614205	0.141441	0.111968	0.196594	0.178273	0.148677	0.131041	0.151798	0.206329	0.173248	0.164579	0.108707	0.168943	0.134854	0.146379	0.10633	0.141059	0.133798	0.153704	0.127217	0.139169	0.136073	0.137336	0.186824	0.193534	0.154344	0.148127	0.174161	0.197545	0.143715	0.164079	0.144365	0.154948	0.135118	0.140338	0.137158	0.137197	0.12057	0.117656	0.153043	0.120647	0.11703	0.137951	0.115633
Fluid shear stress and atherosclerosis	0.0734131	0.106715	0.0672992	0.103535	0.0833154	0.0876051	0.16047	0.134552	0.217664	0.204716	0.166952	0.156736	0.175346	0.211771	0.188337	0.21101	0.124942	0.187705	0.165512	0.162834	0.127522	0.152028	0.150889	0.179775	0.179941	0.164043	0.166002	0.16281	0.201217	0.206831	0.17003	0.164145	0.165679	0.20502	0.150082	0.172271	0.170307	0.171706	0.157077	0.16671	0.156191	0.158491	0.144139	0.13519	0.168942	0.14686	0.142609	0.155648	0.132931
Tuberculosis	0.115299	0.129412	0.177872	0.14325	0.15298	0.167256	0.137621	0.128068	0.127926	0.189816	0.153065	0.166883	0.151878	0.169988	0.142826	0.175773	0.149237	0.164314	0.139293	0.137549	0.155143	0.158792	0.195958	0.167977	0.105515	0.153716	0.119405	0.149197	0.138357	0.14419	0.138777	0.133288	0.160093	0.136924	0.138909	0.14527	0.157258	0.168288	0.150947	0.159431	0.149129	0.160487	0.136475	0.139038	0.141992	0.138233	0.145057	0.144021	0.148205
Antifolate resistance	0.0751492	0.0605204	0.106679	0.111771	0.120205	0.140267	0.14739	0.111241	0.110821	0.119642	0.12753	0.107863	0.119123	0.11618	0.111773	0.107253	0.11329	0.117018	0.108867	0.10547	0.11099	0.127301	0.109787	0.10526	0.129003	0.115168	0.125178	0.113405	0.111309	0.123364	0.112073	0.0971351	0.110074	0.113879	0.113925	0.103849	0.116807	0.112254	0.119136	0.128284	0.129593	0.117769	0.104646	0.108465	0.0982766	0.136925	0.107602	0.112574	0.109475
Legionellosis	0.120462	0.183902	0.199046	0.146155	0.140999	0.228024	0.220413	0.200561	0.172791	0.186841	0.174628	0.213134	0.197026	0.177549	0.180128	0.163181	0.165311	0.180636	0.169203	0.166415	0.182118	0.166809	0.170963	0.171902	0.120246	0.162644	0.148142	0.170265	0.177311	0.19621	0.174805	0.164564	0.190401	0.205823	0.200586	0.196694	0.187974	0.192194	0.19078	0.155648	0.184435	0.19314	0.200398	0.181094	0.193538	0.169044	0.181927	0.19329	0.195751
Longevity regulating pathway - worm	0.187082	0.17638	0.212127	0.164308	0.177584	0.222457	0.308935	0.211002	0.170666	0.218777	0.184673	0.195977	0.197182	0.209562	0.188577	0.239966	0.150208	0.200298	0.176186	0.183383	0.175516	0.17404	0.225934	0.202933	0.181359	0.187838	0.174206	0.166143	0.153541	0.17367	0.1693	0.161819	0.190407	0.166268	0.19798	0.186319	0.197675	0.187179	0.175574	0.182141	0.181414	0.194428	0.168549	0.18876	0.170155	0.177454	0.195511	0.1858	0.171602
D-Glutamine and D-glutamate metabolism	0.0920574	0.0651149	0.1086	0.157066	0.145491	0.18667	0.203613	0.126113	0.180012	0.163539	0.165845	0.15632	0.175976	0.204384	0.180557	0.173285	0.179943	0.154709	0.168394	0.162069	0.162294	0.17378	0.159089	0.185062	0.175253	0.164452	0.159232	0.169844	0.164095	0.156425	0.166668	0.16908	0.168802	0.19888	0.177567	0.164414	0.156357	0.171518	0.189621	0.173574	0.168944	0.159637	0.164788	0.186179	0.168491	0.163234	0.176297	0.173697	0.177269
Longevity regulating pathway - multiple species	0.0938484	0.182961	0.139975	0.14704	0.143526	0.0797637	0.300888	0.210589	0.0798851	0.135075	0.128332	0.0909096	0.242802	0.146531	0.113981	0.0760743	0.147705	0.106509	0.0921816	0.128906	0.162929	0.19711	0.232227	0.114284	0.0701471	0.129276	0.0768511	0.121669	0.133556	0.110345	0.11191	0.12056	0.144609	0.121578	0.164302	0.127011	0.143334	0.204721	0.157673	0.118909	0.141615	0.140549	0.161465	0.133661	0.180219	0.160232	0.167503	0.156831	0.160696
Apoptosis - fly	0.150605	0.0904209	0.123783	0.148366	0.135777	0.0302056	0.179126	0.0777926	0.148227	0.13496	0.105199	0.0871924	0.0627477	0.028485	0.0717642	0.13613	0.110117	0.0998865	0.0547588	0.152993	0.0574864	0.055195	0.0914606	0.0957323	0.213146	0.109306	0.106606	0.071166	0.0501234	0.112785	0.110397	0.129506	0.0635213	0.0459929	0.0948462	0.107376	0.0873283	0.0873969	0.0694397	0.119329	0.0917879	0.121053	0.105455	0.0609077	0.0586654	0.104389	0.0694674	0.0626549	0.0232652
Secondary bile acid biosynthesis	0.0931378	0.0741876	0.0816625	0.0770393	0.071924	0.00568622	0.0374258	0.00378943	0.0926897	0.0870049	0.0371684	0.0425867	0.087852	0.0614403	0.0762207	0.0502697	0.0943198	0.0662179	0.039458	0.0845592	0.0760654	0.0663543	0.0914829	0.0573765	0.0346517	0.0732906	0.032052	0.0648704	0.0694282	0.0592285	0.0554736	0.073607	0.0637679	0.0749013	0.106794	0.0381103	0.080371	0.0689298	0.0707411	0.0633805	0.111233	0.0639817	0.107906	0.0806601	0.112859	0.0840974	0.0845411	0.100847	0.0766405
Ribosome biogenesis in eukaryotes	0.0647497	0.077562	0.182069	0.0712597	0.0702129	0.123316	0.115572	0.135867	0.0761619	0.102927	0.10639	0.0860257	0.472682	0.124454	0.0697806	0.0724883	0.147648	0.0822152	0.0599905	0.122664	0.0659497	0.161773	0.165984	0.0826025	0.0907063	0.12346	0.0771595	0.0623544	0.0556917	0.0700793	0.0769526	0.0678159	0.0688668	0.065055	0.0606025	0.0621537	0.0816548	0.15789	0.167284	0.0743519	0.0905753	0.0735616	0.0759491	0.0729889	0.0648116	0.0670811	0.0840466	0.089606	0.0861509
Inositol phosphate metabolism	0.0379499	0.038438	0.348489	0.19805	0.218635	0.133102	0.0433834	0.0918167	0.0520099	0.0706035	0.0689427	0.0427077	0.114317	0.0761954	0.0710405	0.065085	0.107623	0.0904839	0.0664095	0.0988232	0.113803	0.0969313	0.13331	0.0808504	0.0766677	0.0823282	0.059188	0.0628275	0.0587067	0.0731493	0.0519782	0.0964958	0.0656481	0.0600781	0.077921	0.058443	0.0721105	0.0829495	0.0771588	0.0628661	0.0823913	0.0820322	0.0675569	0.0785191	0.0865635	0.0680666	0.0715502	0.0655636	0.0792083
D-Alanine metabolism	0.0857634	0.066658	0.0975506	0.0981962	0.105915	0.174753	0.139578	0.138907	0.108919	0.105021	0.0963128	0.116143	0.113619	0.127068	0.110178	0.117529	0.119456	0.108575	0.115773	0.0947096	0.0856943	0.093824	0.122371	0.105424	0.103573	0.093755	0.11161	0.0917309	0.104987	0.0943858	0.0931208	0.092543	0.091057	0.10594	0.0938857	0.091472	0.0976332	0.112787	0.116229	0.122001	0.107396	0.100032	0.102934	0.0987345	0.0930747	0.0975911	0.115553	0.105094	0.0931344
MicroRNAs in cancer	0.0826865	0.106265	0.0408832	0.120834	0.0632379	0.032648	0.118662	0.0202357	0.0304373	0.071365	0.0736498	0.0474758	0.0939663	0.24464	0.12961	0.08226	0.0451093	0.0961256	0.0884244	0.102982	0.0797513	0.102563	0.0658528	0.104718	0.0709816	0.094622	0.0627196	0.102956	0.124124	0.0890297	0.0842645	0.105435	0.0788248	0.118536	0.110953	0.0710402	0.133669	0.127292	0.0753271	0.114321	0.102694	0.0868453	0.134495	0.101568	0.0920581	0.163088	0.0493274	0.107848	0.127089
Degradation of aromatic compounds	0.164712	0.114598	0.0849911	0.0899126	0.0922729	0.0722744	0.0294115	0.0543678	0.0697572	0.0591635	0.048074	0.0611713	0.0452261	0.0606974	0.0550257	0.0719541	0.0295417	0.0730461	0.0641524	0.0520662	0.0333099	0.0346164	0.053188	0.0529832	0.0779817	0.046228	0.0728986	0.0400803	0.0525371	0.059126	0.0466933	0.0781521	0.0459377	0.0536142	0.0457796	0.0590634	0.0345987	0.0457084	0.0429238	0.0529944	0.0362144	0.0532883	0.05145	0.0549125	0.0428716	0.0610814	0.0577458	0.0503562	0.0314415
Benzoate degradation	0.141113	0.0905581	0.0615534	0.075117	0.0712804	0.0316121	0.0216808	0.0664098	0.0460822	0.0582831	0.0527018	0.0495406	0.0326143	0.0375643	0.050216	0.0479035	0.0251977	0.0527946	0.0477465	0.0565666	0.0200083	0.0212698	0.0477447	0.0398311	0.0669638	0.0375464	0.059205	0.0325993	0.0390237	0.0536486	0.0542302	0.0622749	0.0388687	0.0504482	0.0364064	0.0517635	0.0297828	0.0378547	0.0391241	0.0401962	0.036893	0.0426277	0.0562945	0.0402736	0.0434416	0.0534115	0.0677452	0.0505835	0.0366521
Aminobenzoate degradation	0.157235	0.103716	0.285492	0.233642	0.242737	0.147884	0.0179032	0.0418618	0.115159	0.0339652	0.0981381	0.176081	0.0155746	0.0270207	0.0637623	0.10366	0.0347231	0.147683	0.0693099	0.0622919	0.0533737	0.0141839	0.0432469	0.0666381	0.111289	0.0657236	0.088835	0.0657554	0.056828	0.0791266	0.0626048	0.0721309	0.0527978	0.0464886	0.0358022	0.0349287	0.0392712	0.0391148	0.0444385	0.0741906	0.0547472	0.0595335	0.0478998	0.0533958	0.0580265	0.0784409	0.0552996	0.0471541	0.0524952
Penicillin and cephalosporin biosynthesis	0.081154	0.0493505	0.000764945	0.297178	0.0215679	0.0722672	0.0166572	0.0170104	0.0413014	0.140412	0.0453964	0.0120691	0.0120649	0.0341081	0.101208	0.0369731	0.0310591	0.0605074	0.0452034	0.0707628	0.0724318	0.0633713	0.0287932	0.01909	0.0169844	0.0849278	0.0374238	0.046686	0.0560429	0.0368477	0.0311123	0.0383348	0.0395109	0.0280411	0.035052	0.0301683	0.0330638	0.0458164	0.028464	0.0554689	0.0238402	0.0492426	0.0471642	0.0399844	0.0364553	0.0296309	0.0361826	0.042091	0.0290503
Primary immunodeficiency	0.0536142	0.0868234	0.0686849	0.0750569	0.081931	0.098973	0.156029	0.0681739	0.0842589	0.101296	0.07024	0.0631592	0.090474	0.0476694	0.0816625	0.0915963	0.0728553	0.0828988	0.0855956	0.0833251	0.0835643	0.0635946	0.0722037	0.068488	0.105596	0.0850109	0.0790809	0.0645046	0.0606472	0.0777874	0.083186	0.0895055	0.0889054	0.071646	0.0825863	0.0870926	0.0941162	0.059832	0.0771952	0.0988454	0.0838777	0.0976281	0.0657041	0.0911945	0.0874317	0.0652045	0.0804249	0.0773003	0.0590607
Lipoic acid metabolism	0.0458194	0.0292103	0.0603545	0.0811141	0.0642975	0.0841585	0.142265	0.159608	0.019152	0.0596845	0.054168	0.0526399	0.0773242	0.0908252	0.0591649	0.0690227	0.0416509	0.0688842	0.0576929	0.0489303	0.0454575	0.0517611	0.0577137	0.0419728	0.0457794	0.044797	0.0678744	0.0296106	0.0197249	0.0680975	0.0470865	0.0490261	0.0505064	0.0492953	0.0595248	0.0548099	0.058288	0.0613636	0.0611197	0.0682932	0.0582035	0.0604716	0.0608816	0.0457266	0.0596661	0.0646319	0.0656016	0.0549854	0.0323572
Tryptophan metabolism	0.0337514	0.0216568	0.0408973	0.0250743	0.0255666	0.0296797	0.0624091	0.0448046	0.0352904	0.0475366	0.0294651	0.0257206	0.0147927	0.0561736	0.0441392	0.0274545	0.01567	0.0466363	0.0377186	0.021475	0.0516944	0.0299302	0.0315002	0.0306563	0.029365	0.0365738	0.0216252	0.0213945	0.0166856	0.0333815	0.0440896	0.0382673	0.0291449	0.0416348	0.0740023	0.0471829	0.065769	0.0355591	0.0312975	0.0439593	0.0290273	0.0549985	0.0656823	0.0601746	0.0563935	0.0471055	0.0382651	0.0390134	0.0318294
Carbohydrate digestion and absorption	0.0287746	0.0567736	0.00109258	0.00417054	0.00367676	0.0610119	0.0212637	0.0503417	0.00295564	0.0753503	0.0600007	0.113398	0.390599	0.0120623	0.0451476	0.0416443	0.102823	0.0726256	0.0868325	0.0158561	0.0801954	0.0327566	0.125764	0.0874664	0.0545617	0.0413578	0.0420834	0.0530178	0.024664	0.0418125	0.0358185	0.0410161	0.0171651	0.050924	0.0478376	0.0320366	0.062187	0.0870171	0.0981078	0.0584962	0.0524343	0.0450093	0.0396213	0.0325297	0.0249155	0.0343522	0.0343109	0.0568352	0.0244367
Primary bile acid biosynthesis	0.0814571	0.0741876	0.0816625	0.0713829	0.071924	0.00754524	0.014025	0.00378943	0.0907387	0.0821653	0.0345785	0.0338185	0.0843077	0.0490077	0.074293	0.0358847	0.0901241	0.0545298	0.0317922	0.0711882	0.0580555	0.0518973	0.0549505	0.0518755	0.0198578	0.0583611	0.0191618	0.0507258	0.0599021	0.0523035	0.0387938	0.0672582	0.0614046	0.0717195	0.0545391	0.036105	0.049072	0.0543624	0.0637913	0.0592685	0.0491196	0.0392672	0.0313236	0.0579627	0.0553567	0.0462349	0.0631691	0.0620576	0.0465326
Phosphatidylinositol signaling system	0.0280748	0.0445392	0.0406975	0.0449517	0.0464004	0.0481935	0.0387919	0.042094	0.0447973	0.0470534	0.0411234	0.044017	0.05166	0.0483618	0.04114	0.0446807	0.0409842	0.049845	0.0502929	0.0434205	0.0434507	0.0372411	0.0534736	0.0441056	0.0498092	0.0480815	0.0492994	0.0396602	0.0311333	0.0537349	0.0453514	0.0498391	0.0469925	0.0492345	0.0438649	0.0396742	0.0475318	0.0413652	0.0521461	0.044889	0.0489497	0.0445929	0.0395381	0.0407792	0.0394706	0.0459722	0.050357	0.0473921	0.0427191
Zeatin biosynthesis	0.0229207	0.0403477	0.0251289	0.0349805	0.0298457	0.0479059	0.0412384	0.0474849	0.0473088	0.0537122	0.0631531	0.0564699	0.0418693	0.0429792	0.0458057	0.0519698	0.0361446	0.052099	0.0473346	0.0412217	0.0468399	0.0371887	0.0742651	0.0420784	0.0525907	0.0539699	0.0423927	0.0442283	0.0464479	0.0421758	0.0422915	0.0451343	0.0416706	0.048766	0.0412396	0.0348141	0.0481793	0.0433702	0.0508848	0.0471937	0.0514409	0.0532329	0.0448053	0.0473758	0.0432944	0.0479301	0.047734	0.0485229	0.0539569
Proteoglycans in cancer	0.0552938	0.0758367	0.0861383	0.0682362	0.0702129	0.0505347	0.0429711	0.0348995	0.0563351	0.0692867	0.0842602	0.0687826	0.121265	0.0746359	0.0651749	0.0724883	0.0714435	0.075775	0.0574571	0.0665978	0.0513046	0.0898651	0.07802	0.0666871	0.0814684	0.0648683	0.0583222	0.0589583	0.0532345	0.0627914	0.0622764	0.0510563	0.0582984	0.0607754	0.0588057	0.0562681	0.059147	0.0812276	0.0776237	0.071899	0.0742754	0.0640023	0.0572882	0.0608548	0.0579939	0.0593504	0.0636548	0.0542797	0.0594095
MAPK signaling pathway - plant	0.0410849	0.0309648	0.0830489	0.0676962	0.0703631	0.129721	0.0859993	0.101637	0.0699305	0.0482936	0.0429702	0.0660575	0.100247	0.0654567	0.0394943	0.0548814	0.041565	0.0562075	0.0239883	0.0487011	0.0324118	0.0442125	0.0463047	0.0509751	0.0606698	0.047203	0.0668739	0.0155989	0.021899	0.0441001	0.0452212	0.0432124	0.036101	0.03954	0.0433	0.0292655	0.0295145	0.0428577	0.0718779	0.0278256	0.0599549	0.048252	0.0856521	0.0496701	0.0335538	0.044734	0.0719635	0.0484757	0.0362968
Platinum drug resistance	0.0406319	0.03094	0.0505627	0.0397425	0.0419377	0.103793	0.0798576	0.101111	0.057353	0.0425245	0.0350346	0.0477662	0.101473	0.0587078	0.0315091	0.044415	0.0406631	0.0387151	0.0181042	0.0391158	0.0293411	0.0402006	0.0410237	0.0422058	0.0458983	0.0407557	0.0593001	0.0115825	0.0186884	0.0359221	0.0359084	0.040991	0.0302781	0.0316763	0.0362157	0.019171	0.0264439	0.0380657	0.063256	0.0195941	0.0485376	0.0343177	0.080947	0.0462523	0.0265135	0.0345884	0.0607454	0.038752	0.0295352
Nitrotoluene degradation	0.00245125	0.000137904	0.0108745	0.0120881	0.0105091	0.00796672	0.0358944	0.0114441	0.0140494	0.0120572	0.0178492	0.0207493	0.00847762	0.0418076	0.0117526	0.00974837	0.0157056	0.0104743	0.0102865	0.0135374	0.00975421	0.0132514	0.0173108	0.0111827	0.0146869	0.00772326	0.0250323	0.0173447	0.0123232	0.0155102	0.0464938	0.0502815	0.0210174	0.00212638	0.01385	0.0223843	0.0170747	0.0157607	0.00914368	0.0122095	0.0318939	0.0188544	0.0363923	0.0294453	0.0285319	0.0203494	0.0096052	0.0361267	0.020634
Viral carcinogenesis	0.00567722	0.0124432	0.0183096	0.00950521	0.0099656	0.0147036	0.0122445	0.0128424	0.0120096	0.0114813	0.0109885	0.00909589	0.0108206	0.010647	0.010774	0.0105526	0.00920688	0.0102657	0.009962	0.0112771	0.010652	0.00845488	0.00783406	0.0110839	0.00890988	0.0097279	0.0103044	0.00975422	0.0117003	0.0108064	0.00983126	0.0104361	0.0109909	0.0126356	0.0103225	0.0114304	0.0103856	0.0192277	0.0114283	0.0106207	0.0102447	0.00957106	0.0105791	0.0111504	0.0108231	0.0113585	0.0110836	0.0106261	0.011559
Naphthalene degradation	0.0194123	0.0215915	0.0242862	0.0156624	0.0176597	0.0376131	0.00494751	0.0106309	0.0308389	0.0155739	0.00866714	0.0198919	0.0126049	0.00466529	0.0151614	0.022344	0.0113613	0.0235616	0.0157334	0.00939076	0.0117197	0.0141981	0.0118517	0.0176761	0.0123216	0.017339	0.0255856	0.0133605	0.0131973	0.012696	0.00972722	0.0102435	0.0176369	0.0132143	0.0105341	0.0114881	0.0110148	0.0132632	0.0176844	0.0132279	0.0126153	0.0135946	0.0126134	0.0136148	0.0102201	0.01469	0.0164594	0.0137623	0.00741145
Isoquinoline alkaloid biosynthesis	0.000783553	9.43e-05	0.00342795	0.00368122	0.00297785	0.00181791	0.00455542	0.00704503	0.00671986	0.0111756	0.0172783	0.00926778	0.0160102	0.0190796	0.0075691	0.00624731	0.0107086	0.00617369	0.00768336	0.0127804	0.0101766	0.0132555	0.0148285	0.00661003	0.00492736	0.00994073	0.00634281	0.0125059	0.0103698	0.0110568	0.0105181	0.0139135	0.013577	0.0115045	0.00954849	0.00995266	0.00992539	0.0114674	0.0117188	0.00936327	0.0134722	0.0101501	0.0143144	0.00916609	0.0110761	0.0107562	0.00893862	0.0130007	0.0130579
Type II diabetes mellitus	0.00567722	0.0115512	0.0100102	0.0101441	0.0108764	0.010937	0.0122445	0.0131468	0.01226	0.0128323	0.0120779	0.00914566	0.0108206	0.00675117	0.0104375	0.0107947	0.00920688	0.0103279	0.0101325	0.0130524	0.010837	0.00859326	0.00783406	0.0111503	0.00951731	0.0100214	0.0102522	0.0102569	0.0117558	0.0111031	0.0102659	0.011736	0.0115855	0.0127416	0.0105137	0.0120506	0.0109306	0.0125637	0.0117807	0.0109226	0.0107026	0.00993688	0.0126799	0.0116044	0.0111462	0.012181	0.0112932	0.0113579	0.0120153
Human papillomavirus infection	0.00567722	0.0118	0.00970928	0.00950521	0.0099656	0.0105206	0.0122445	0.0128424	0.0120096	0.0114813	0.0109885	0.00909589	0.0108206	0.00749638	0.0103918	0.0105526	0.00920688	0.0102657	0.009962	0.0112771	0.010652	0.00845488	0.00783406	0.0110839	0.00890988	0.0097279	0.0103044	0.00975422	0.0117003	0.0108064	0.00983126	0.0104361	0.0109909	0.0126356	0.0103225	0.0114304	0.0103856	0.013496	0.0114283	0.0106207	0.0102447	0.00957106	0.0105791	0.0111504	0.0108231	0.0113585	0.0110836	0.0106261	0.011559
Antigen processing and presentation	0.000613546	0.00976646	0.000260062	0.00296	0.00258064	0.000757123	0.00289006	0.00193266	0.00351836	0.00659403	0.007237	0.00604344	0.00201628	0.00981903	0.0085835	0.00458861	0.00583901	0.00652352	0.00835315	0.00563588	0.00926861	0.00630255	0.00853477	0.00778626	0.00316985	0.00623233	0.00312417	0.00869838	0.0109487	0.00718829	0.00640768	0.00924897	0.00886195	0.0112518	0.0121402	0.00990279	0.01153	0.00791805	0.0065132	0.00902641	0.00755798	0.00772324	0.00915535	0.00928206	0.0131879	0.00755501	0.00550963	0.00862179	0.00936786
IL-17 signaling pathway	0.000613546	0.00976646	0.000260062	0.00296	0.00258064	0.000757123	0.00289006	0.00193266	0.00351836	0.00659403	0.007237	0.00604344	0.00201628	0.00981903	0.0085835	0.00458861	0.00583901	0.00652352	0.00835315	0.00563588	0.00926861	0.00630255	0.00853477	0.00778626	0.00316985	0.00623233	0.00312417	0.00869838	0.0109487	0.00718829	0.00640768	0.00924897	0.00886195	0.0112518	0.0121402	0.00990279	0.01153	0.00791805	0.0065132	0.00902641	0.00755798	0.00772324	0.00915535	0.00928206	0.0131879	0.00755501	0.00550963	0.00862179	0.00936786
Progesterone-mediated oocyte maturation	0.000613546	0.00976646	0.000260062	0.00296	0.00258064	0.000757123	0.00289006	0.00193266	0.00351836	0.00659403	0.007237	0.00604344	0.00201628	0.00981903	0.0085835	0.00458861	0.00583901	0.00652352	0.00835315	0.00563588	0.00926861	0.00630255	0.00853477	0.00778626	0.00316985	0.00623233	0.00312417	0.00869838	0.0109487	0.00718829	0.00640768	0.00924897	0.00886195	0.0112518	0.0121402	0.00990279	0.01153	0.00791805	0.0065132	0.00902641	0.00755798	0.00772324	0.00915535	0.00928206	0.0131879	0.00755501	0.00550963	0.00862179	0.00936786
Prostate cancer	0.000613546	0.00976646	0.000260062	0.00296	0.00258064	0.000757123	0.00289006	0.00193266	0.00351836	0.00659403	0.007237	0.00604344	0.00201628	0.00981903	0.0085835	0.00458861	0.00583901	0.00652352	0.00835315	0.00563588	0.00926861	0.00630255	0.00853477	0.00778626	0.00316985	0.00623233	0.00312417	0.00869838	0.0109487	0.00718829	0.00640768	0.00924897	0.00886195	0.0112518	0.0121402	0.00990279	0.01153	0.00791805	0.0065132	0.00902641	0.00755798	0.00772324	0.00915535	0.00928206	0.0131879	0.00755501	0.00550963	0.00862179	0.00936786
Th17 cell differentiation	0.000613546	0.00976646	0.000260062	0.00296	0.00258064	0.000757123	0.00289006	0.00193266	0.00351836	0.00659403	0.007237	0.00604344	0.00201628	0.00981903	0.0085835	0.00458861	0.00583901	0.00652352	0.00835315	0.00563588	0.00926861	0.00630255	0.00853477	0.00778626	0.00316985	0.00623233	0.00312417	0.00869838	0.0109487	0.00718829	0.00640768	0.00924897	0.00886195	0.0112518	0.0121402	0.00990279	0.01153	0.00791805	0.0065132	0.00902641	0.00755798	0.00772324	0.00915535	0.00928206	0.0131879	0.00755501	0.00550963	0.00862179	0.00936786
Estrogen signaling pathway	0.000613546	0.00976646	0.000260062	0.00296	0.00258064	0.000857992	0.00289006	0.00193266	0.00351836	0.00659403	0.007237	0.00604344	0.00201628	0.00981903	0.0085835	0.00458861	0.00583901	0.00652352	0.00835315	0.00563588	0.00926861	0.00630255	0.00853477	0.00778626	0.00316985	0.00623233	0.00312417	0.00869838	0.0109487	0.00718829	0.00640768	0.00924897	0.00886195	0.0112518	0.0121402	0.00990279	0.01153	0.00791805	0.0065132	0.00902641	0.00755798	0.00772324	0.00915535	0.00928206	0.0131879	0.00755501	0.00550963	0.00862179	0.00936786
PI3K-Akt signaling pathway	0.000613546	0.00982249	0.00348503	0.00355148	0.00301262	0.0108985	0.0124885	0.00826472	0.00351836	0.0066995	0.007237	0.00604344	0.00201628	0.0109866	0.00882219	0.00458861	0.00611489	0.00671876	0.00845454	0.00563588	0.00963412	0.00662057	0.00868322	0.00863324	0.00347367	0.00640437	0.00332181	0.00874016	0.0120422	0.00729416	0.00658715	0.00971502	0.00886195	0.0119296	0.0132606	0.0102606	0.01202	0.00877024	0.00734453	0.009725	0.00822985	0.00841407	0.0103649	0.0105657	0.0144474	0.00777457	0.00573793	0.00906841	0.011059
AMPK signaling pathway	0.00424043	0.00831485	0.0310477	0.0112567	0.011024	0.0293969	0.0218101	0.0188686	0.00418363	0.00801682	0.00853967	0.00920636	0.00216607	0.0172669	0.0123722	0.00976947	0.00711001	0.0112652	0.0106315	0.0100308	0.0123779	0.00837947	0.00540499	0.00966613	0.0117573	0.011804	0.0123351	0.0114677	0.0118719	0.0109808	0.0108875	0.0133234	0.0123016	0.0112619	0.0134086	0.0154357	0.0118537	0.0133661	0.00872146	0.0124776	0.0117214	0.0127085	0.0121731	0.0121497	0.0122544	0.0108851	0.0100074	0.0121628	0.0123119
Alzheimer disease	0.0174368	0.0241197	0.148705	0.0230656	0.0213653	0.0294082	0.0164189	0.0341878	0.01674	0.017979	0.0178473	0.0184389	0.0160768	0.0212333	0.0154909	0.0195653	0.0147665	0.0159912	0.0137419	0.0147671	0.0154058	0.0166458	0.0118837	0.0175829	0.0127556	0.0206859	0.0480132	0.0139164	0.0142565	0.0134082	0.014266	0.0161632	0.013841	0.0142705	0.0155369	0.0208245	0.0172577	0.014502	0.0151559	0.0162387	0.013624	0.0125067	0.0158451	0.0172439	0.0158958	0.0156955	0.0182389	0.0140517	0.0163911
Phenazine biosynthesis	0.0137358	0.00954545	0.00108384	0.00363421	0.00291098	0.0219639	0.00720656	0.0279151	0.0108264	0.014754	0.024544	0.0243074	0.0151974	0.00538513	0.0181487	0.0262869	0.0181428	0.0199302	0.0225025	0.0129786	0.0202667	0.0127048	0.0133271	0.0231056	0.0159732	0.0185998	0.0189691	0.0225195	0.0225557	0.016151	0.018796	0.0180959	0.0189744	0.0160862	0.0236012	0.0238143	0.0187839	0.0188097	0.017782	0.0201886	0.015526	0.0243932	0.0225025	0.0133314	0.0145539	0.0160339	0.0141388	0.0139392	0.0181109
Glucosinolate biosynthesis	0.0134926	0.00721101	0.000972464	0.004173	0.00337684	0.020758	0.0187638	0.0183897	0.0196934	0.021052	0.0195398	0.0150169	0.0307187	0.00868409	0.0181237	0.0209575	0.0330682	0.0199742	0.0232672	0.0163802	0.0239741	0.0277726	0.0304874	0.0206831	0.0186001	0.018754	0.0161186	0.0241872	0.0221309	0.0125365	0.0179561	0.0125735	0.0197229	0.0157005	0.016548	0.0206283	0.0201556	0.0220092	0.0195093	0.0258105	0.0208451	0.0185001	0.018524	0.0135866	0.0166583	0.0171889	0.0152545	0.017568	0.0156315
Prolactin signaling pathway	0.0187542	0.0354961	0.0175964	0.0220983	0.0254471	0.0312782	0.00511014	0.0189429	0.0503532	0.0285276	0.0169391	0.0205106	0.0289003	0.0221948	0.0235994	0.017378	0.0314899	0.023999	0.0292403	0.0307739	0.0223947	0.034677	0.0280178	0.0318815	0.0359623	0.0276016	0.0238499	0.0243128	0.0350532	0.0284382	0.0234092	0.0255155	0.0242183	0.0354716	0.0246253	0.0304734	0.0288558	0.0270119	0.0310503	0.0324215	0.0229234	0.0224287	0.017863	0.0256885	0.0235637	0.0235347	0.0307398	0.0292588	0.0246482
Neomycin, kanamycin and gentamicin biosynthesis	0.0130321	0.0148925	0.00830218	0.0141029	0.0139828	0.0149719	0.0147677	0.0170712	0.0152377	0.0184334	0.0154284	0.0146262	0.00396544	0.0202247	0.0179808	0.0146885	0.0127166	0.0244523	0.0179098	0.0156568	0.023006	0.0189412	0.00955279	0.015139	0.0113765	0.017934	0.0105412	0.0170116	0.01702	0.0153447	0.0145638	0.018349	0.0181934	0.0152749	0.021204	0.0228908	0.0214571	0.0164121	0.0146702	0.0165634	0.0144059	0.0180312	0.0202185	0.0215842	0.0200711	0.0189044	0.0138349	0.0184293	0.0229973
Pathways in cancer	0.010593	0.0162292	0.00593978	0.00413512	0.00414052	0.00859861	0.00729304	0.0334523	0.0112846	0.0109589	0.0105122	0.0097568	0.00739231	0.0117862	0.0151646	0.0270495	0.00685646	0.00730079	0.0210196	0.0126724	0.0122706	0.00730941	0.00992519	0.0202209	0.027854	0.0154935	0.0267891	0.0167617	0.0148579	0.0203692	0.0206256	0.0287256	0.0144364	0.0164415	0.0180664	0.0198597	0.0196263	0.0133386	0.0150469	0.0190973	0.012636	0.019708	0.0208379	0.0170486	0.0180598	0.0185716	0.0151619	0.0140876	0.0131389
Synthesis and degradation of ketone bodies	0.0184285	0.0143855	0.0218994	0.016157	0.0185327	0.0163563	0.00303229	0.0126158	0.0150921	0.00882118	0.0100241	0.009807	0.00194394	0.00902882	0.0127279	0.013729	0.00273613	0.00976367	0.00786924	0.0195994	0.00474869	0.00245129	0.00232752	0.00905106	0.0206251	0.0123547	0.0174782	0.00621741	0.00426393	0.0174089	0.0119344	0.013967	0.00739554	0.0281716	0.00721976	0.00646268	0.00964714	0.00583458	0.0124725	0.00420903	0.0118477	0.00762661	0.0094624	0.0107996	0.0125111	0.0172823	0.0366543	0.0156614	0.0133769
Proximal tubule bicarbonate reclamation	0.00725796	0.00487901	0.00878058	0.0121125	0.0107815	0.00976029	0.0151467	0.0146764	0.00117789	0.00461445	0.00316427	0.00177527	0.00179764	0.0152983	0.00654349	0.00557237	0.00229465	0.00570136	0.00603692	0.00450058	0.00611248	0.00454479	0.00393699	0.00414258	0.00482088	0.00558197	0.00603396	0.00322456	0.00276324	0.00497393	0.00568608	0.00640536	0.00575341	0.00296163	0.00950865	0.00495201	0.0069648	0.00491554	0.00491806	0.00704766	0.00908442	0.00751114	0.00852693	0.0116218	0.00876752	0.00641475	0.00579644	0.0049395	0.00553556
Biosynthesis of vancomycin group antibiotics	0.0196744	0.0129947	0.0158205	0.0228769	0.0203002	0.0134994	0.00860537	0.0173234	0.0307408	0.0378757	0.055078	0.029867	0.0601469	0.0118549	0.0276945	0.0301515	0.0346269	0.0250279	0.0295995	0.0363448	0.0348509	0.029974	0.0243247	0.0175863	0.0356431	0.0287421	0.0316066	0.0372562	0.0323084	0.0266416	0.0290735	0.0239704	0.0262426	0.0227187	0.0280722	0.0226428	0.0267415	0.0313358	0.0349217	0.0306497	0.0324687	0.0291335	0.0286828	0.0258452	0.0278491	0.027504	0.0299423	0.0310008	0.0352913
Type I diabetes mellitus	0.0477982	0.0533136	0.0268967	0.0298486	0.0267669	0.0357819	0.0420278	0.0548473	0.0311861	0.043306	0.0325327	0.0394039	0.0447134	0.0300083	0.0331363	0.0378459	0.0240484	0.0331768	0.0369874	0.0312315	0.0364593	0.030732	0.0368658	0.0346213	0.0400179	0.0346636	0.0327385	0.0337243	0.0308271	0.0357975	0.0376714	0.0299484	0.0325006	0.0309325	0.0376362	0.0273826	0.0350176	0.032236	0.0378927	0.0351504	0.0336057	0.0359705	0.0321048	0.0359557	0.0393332	0.0339625	0.0325247	0.0335134	0.0326912
Carbapenem biosynthesis	0.0542917	0.0339916	0.0615701	0.0406829	0.048475	0.0453651	0.0511262	0.0379052	0.0410843	0.0400002	0.029348	0.0517482	0.0547785	0.0256325	0.0300683	0.0562175	0.0343587	0.0451743	0.0417659	0.0420187	0.0391956	0.0495539	0.0406333	0.0424158	0.0422011	0.047584	0.0390878	0.0556877	0.0391001	0.0478245	0.0437459	0.0351735	0.0438402	0.0436825	0.0453404	0.0431409	0.0391554	0.0492424	0.0506641	0.0496559	0.0470086	0.066404	0.0422861	0.0421815	0.0404868	0.0429201	0.0541235	0.0493017	0.0496627
Tropane, piperidine and pyridine alkaloid biosynthesis	0.00794788	0.00462351	0.00239037	0.0060461	0.0052809	0.00601775	0.02041	0.025763	0.0193795	0.0251584	0.0339194	0.0250714	0.0325046	0.0287441	0.0160885	0.0105562	0.0210282	0.0204558	0.0192126	0.0240056	0.0254206	0.0266623	0.0259464	0.0195057	0.0150482	0.0208286	0.0115817	0.0252938	0.0237575	0.0258555	0.0257382	0.0267821	0.0266058	0.0238629	0.0212131	0.0228474	0.0232093	0.0260195	0.0217261	0.018087	0.0263725	0.0218874	0.026271	0.0198985	0.0224838	0.0227307	0.0168173	0.0232728	0.0237998
Biosynthesis of ansamycins	0.0336413	0.0372461	0.0121865	0.0112291	0.0184009	0.0242127	0.0290017	0.0172244	0.0423209	0.0233986	0.0372142	0.0308419	0.0141498	0.0354654	0.0268629	0.0271798	0.0364559	0.0654007	0.0255915	0.0214376	0.032898	0.0297877	0.0244209	0.0400516	0.0312314	0.0302572	0.0234806	0.0253913	0.0310775	0.0250923	0.0271239	0.0326021	0.0362084	0.037975	0.0344067	0.0311668	0.0328764	0.0353648	0.0287549	0.0318449	0.0285755	0.0299273	0.0277362	0.0298618	0.0306635	0.0259223	0.0260663	0.0323687	0.0298881
Chloroalkane and chloroalkene degradation	0.035072	0.0341336	0.0433814	0.03636	0.0401444	0.041809	0.0118797	0.0180081	0.0662726	0.03016	0.0145087	0.0239478	0.0164646	0.0356701	0.0220688	0.0279531	0.028798	0.0322239	0.0246877	0.0291361	0.0216639	0.0320376	0.0214319	0.0277349	0.0173224	0.0305367	0.0320676	0.0353181	0.0411621	0.0214445	0.0193862	0.0246774	0.0335186	0.0295254	0.0239383	0.0277277	0.0264988	0.0248051	0.0308757	0.0267998	0.0301624	0.022248	0.0289099	0.029762	0.0359769	0.0306583	0.0382466	0.0297331	0.0272778
Thermogenesis	0.00485095	0.0112949	0.131692	0.0116933	0.00410666	0.0396492	0.0432484	0.0390391	0.0166177	0.0336924	0.0309758	0.0176249	0.061184	0.0243057	0.0187445	0.0116474	0.027718	0.0199819	0.0190238	0.0233832	0.0233389	0.0282949	0.0366844	0.0174532	0.0104852	0.0281313	0.0479962	0.0191724	0.0176712	0.0171157	0.0131408	0.017968	0.0221	0.0197354	0.0252567	0.023584	0.0327762	0.0292753	0.0309416	0.0210345	0.0217425	0.0242688	0.0220253	0.0249027	0.0210675	0.0161902	0.0240003	0.0236937	0.0242116
Adipocytokine signaling pathway	0.00287441	0.0112704	0.00288911	0.011623	0.00450137	0.0393446	0.0511927	0.0376141	0.0166177	0.0336854	0.0301286	0.0165728	0.0606544	0.0243188	0.0189832	0.0112295	0.0279938	0.0199671	0.0191251	0.0233832	0.0237044	0.0286129	0.0365341	0.0183002	0.0105239	0.0283033	0.0150344	0.0192142	0.0187647	0.0162899	0.0122397	0.0162783	0.0221	0.0204131	0.0263071	0.0235274	0.0325609	0.0292392	0.0317729	0.0217331	0.02102	0.0248682	0.0220478	0.0254617	0.0222687	0.0164098	0.0242286	0.0241403	0.0259027
Ferroptosis	0.0238248	0.0272935	0.00285775	0.0188962	0.00756282	0.0401	0.0483275	0.0385568	0.0192583	0.0423195	0.0456819	0.0263168	0.0624338	0.035963	0.0243721	0.0183563	0.0305333	0.0323785	0.0318449	0.0356558	0.0381997	0.0336212	0.0460161	0.0234949	0.0157069	0.039392	0.038913	0.0269644	0.035896	0.0256179	0.0216005	0.0316814	0.0302162	0.0262323	0.039931	0.0328738	0.0549681	0.0376083	0.0404974	0.0301433	0.0288726	0.0395355	0.0298245	0.0387376	0.0378227	0.0311086	0.0344255	0.0364202	0.0405785
Central carbon metabolism in cancer	0.0513413	0.0584463	0.0871221	0.0806382	0.0818291	0.0605513	0.0527587	0.0624361	0.0609544	0.051676	0.0401709	0.0405797	0.0564072	0.0378638	0.0516966	0.0574792	0.0337407	0.0522724	0.0533616	0.0578338	0.0485453	0.0450455	0.0397165	0.0405138	0.0526656	0.0575177	0.0649609	0.0374631	0.0298779	0.0512452	0.0420953	0.0483283	0.0469862	0.0455021	0.0455578	0.0429975	0.0441984	0.0447038	0.0540267	0.0473068	0.0496467	0.0475743	0.0455843	0.0511936	0.049299	0.0585647	0.0725548	0.0537129	0.0411507
PPAR signaling pathway	0.020169	0.0559188	0.0478853	0.0423421	0.0407448	0.0864339	0.105629	0.0733621	0.054488	0.059058	0.0385422	0.0221983	0.0637216	0.0555882	0.0395853	0.0253359	0.0586438	0.0468757	0.0390356	0.0500909	0.0429065	0.0599385	0.0558141	0.0319038	0.0194495	0.0528693	0.0401206	0.041694	0.0382914	0.0454358	0.0354127	0.039185	0.0524989	0.0525411	0.0558619	0.0457654	0.053547	0.0537116	0.0522398	0.038181	0.0479908	0.0425245	0.0448303	0.0550076	0.0588624	0.0431803	0.0556565	0.0510963	0.053651
GABAergic synapse	0.0457275	0.0286519	0.0218863	0.0280919	0.0252361	0.0229063	0.0355974	0.0250992	0.0239116	0.0364932	0.0289063	0.0277469	0.0421596	0.0420856	0.0343804	0.0286294	0.0309412	0.0314507	0.0318574	0.0294201	0.0393999	0.0372041	0.0356472	0.0280097	0.0277529	0.0341669	0.0269255	0.0306763	0.026657	0.0307127	0.0303942	0.0356101	0.0337502	0.0256738	0.0419919	0.0366607	0.0371584	0.0344137	0.0336782	0.0383141	0.0341913	0.036926	0.0352478	0.0390036	0.0420776	0.0299219	0.0373382	0.0372181	0.0338362
Glutamatergic synapse	0.0168178	0.0107574	0.0183376	0.0254591	0.0241953	0.0218378	0.0326176	0.0247386	0.0235957	0.0296931	0.027838	0.0251238	0.0330787	0.039348	0.0309899	0.0258988	0.0288012	0.0282457	0.0280107	0.0265974	0.033215	0.0345348	0.0348955	0.0263706	0.025817	0.0311282	0.0236393	0.0293685	0.0259767	0.0280884	0.0272722	0.0332574	0.0304777	0.0244546	0.036836	0.0335168	0.0313115	0.0310614	0.0286405	0.035448	0.0312105	0.0323961	0.0314233	0.0347017	0.0358207	0.0270811	0.0339827	0.0320555	0.0327639
Novobiocin biosynthesis	0.0182495	0.0113293	0.0156057	0.0209859	0.0221322	0.0301642	0.0369908	0.0460136	0.0349404	0.0380262	0.0447842	0.0336452	0.0523736	0.0281345	0.0313674	0.0264455	0.0405788	0.0383074	0.0381255	0.0377409	0.0439905	0.0461656	0.0433241	0.0389884	0.0336639	0.0408083	0.0335006	0.0396388	0.0360044	0.03892	0.041037	0.0356766	0.0442627	0.0401136	0.0402026	0.0372974	0.0414397	0.0457702	0.0395001	0.0372531	0.0420985	0.0390577	0.0423572	0.0295517	0.0392897	0.0398716	0.0285882	0.0430278	0.0363923
HIF-1 signaling pathway	0.0636956	0.0688207	0.0730018	0.0520393	0.0500622	0.041977	0.0399579	0.0587443	0.0362503	0.0367872	0.0375	0.0458712	0.0284872	0.0290261	0.0415297	0.0509632	0.0352662	0.0440695	0.0446379	0.0446266	0.0403866	0.0340606	0.026032	0.0400593	0.0473706	0.04535	0.0432602	0.0375141	0.0380189	0.0341434	0.0374296	0.0372956	0.033359	0.0372593	0.0401631	0.0425445	0.0368002	0.0339963	0.0424425	0.04193	0.0359908	0.037201	0.0406896	0.0380538	0.0394088	0.0428996	0.0512044	0.0348145	0.0369809
Plant-pathogen interaction	0.0179081	0.0544149	0.0307315	0.0425238	0.0428507	0.0476935	0.0591084	0.0508805	0.0439498	0.0476579	0.0508961	0.0189709	0.0181181	0.0479952	0.0517471	0.0256544	0.0408013	0.0493801	0.0388933	0.0528242	0.0442724	0.0533649	0.0360753	0.0328007	0.0165306	0.0473964	0.0380024	0.0476724	0.0482636	0.0857975	0.052106	0.0802452	0.0823191	0.0726964	0.0707455	0.0645208	0.0521343	0.0482536	0.0431091	0.045841	0.0493575	0.0488304	0.0471238	0.0553728	0.0668267	0.0461895	0.04682	0.0465836	0.0454539
beta-Alanine metabolism	0.0582116	0.0184184	0.04963	0.0617857	0.0642479	0.0334003	0.0595517	0.0430974	0.0351835	0.0488431	0.0434865	0.0380421	0.0247147	0.0556378	0.0469898	0.0284299	0.0479418	0.0347405	0.0559334	0.048035	0.0734358	0.0358612	0.0433755	0.0492152	0.027922	0.0389717	0.0294802	0.0534135	0.0707095	0.0383359	0.0521505	0.0638485	0.0633141	0.0549546	0.06373	0.0591553	0.0602875	0.0461707	0.043473	0.0522748	0.0579394	0.0499771	0.0629605	0.0499826	0.047954	0.0451684	0.0313465	0.0458028	0.035893
Taurine and hypotaurine metabolism	0.115142	0.0999904	0.0319622	0.0457956	0.0405377	0.0953246	0.099289	0.0960781	0.0417326	0.0780813	0.0659375	0.0628859	0.0492121	0.0922875	0.06114	0.0681871	0.0446557	0.0486325	0.0804432	0.0692576	0.0680198	0.0456297	0.0350773	0.0821122	0.0704724	0.0700115	0.0855033	0.0658098	0.0592638	0.0782083	0.0584339	0.078555	0.0756749	0.0773407	0.0672684	0.0621215	0.0710758	0.0569717	0.0646627	0.069288	0.0564516	0.0698245	0.0680146	0.0771392	0.0630105	0.0736186	0.0886404	0.0739635	0.0713167
Prodigiosin biosynthesis	0.0771402	0.0732987	0.0738645	0.0744813	0.0813595	0.0489932	0.0321752	0.0457661	0.088527	0.0517466	0.0748126	0.0839327	0.0269734	0.0461968	0.0715228	0.0669292	0.056487	0.07137	0.0776955	0.0624574	0.0663051	0.0604884	0.0529104	0.0594925	0.0579377	0.0607801	0.055006	0.0782522	0.079074	0.0704	0.0620732	0.0703608	0.0695862	0.0847259	0.0821364	0.0716028	0.0645453	0.0652712	0.0592387	0.0692693	0.0714557	0.0639796	0.0565988	0.0653688	0.0849066	0.0655464	0.0661546	0.0670513	0.0741514
Acarbose and validamycin biosynthesis	0.0373603	0.0246787	0.0313447	0.0473823	0.0440738	0.0295689	0.0289301	0.0435996	0.0598015	0.0706716	0.102983	0.0592857	0.107092	0.0415297	0.0614318	0.068851	0.0787251	0.055972	0.0621594	0.06621	0.0690974	0.0693259	0.0456888	0.0502525	0.0511088	0.0619779	0.0567279	0.0835705	0.0914749	0.0671572	0.0596392	0.0485323	0.0597378	0.0532621	0.0491333	0.0524572	0.0557346	0.0803575	0.0625558	0.0653608	0.0730563	0.0650568	0.0553095	0.0593537	0.0603938	0.0639313	0.0627954	0.0616103	0.0962512
Insulin signaling pathway	0.0103907	0.0196351	0.0979516	0.115992	0.123135	0.0840247	0.056946	0.135946	0.0390431	0.0691375	0.0443966	0.0321294	0.030353	0.0451135	0.0772436	0.0736252	0.051086	0.0371039	0.0810535	0.0509901	0.0660515	0.12883	0.0502167	0.0808997	0.043175	0.0594254	0.132496	0.0632424	0.0809081	0.0679262	0.0851865	0.0648031	0.106217	0.0861719	0.071033	0.0820135	0.0809236	0.0707581	0.0574437	0.0724052	0.0773084	0.0771411	0.0617051	0.0665425	0.068463	0.0638231	0.0535743	0.059776	0.0703902
Fatty acid degradation	0.026996	0.0362537	0.0324015	0.0295096	0.0237814	0.072863	0.0598276	0.0507831	0.0555254	0.0537808	0.0464179	0.0459403	0.0795517	0.0564351	0.0424662	0.0361339	0.0452193	0.0530934	0.0404585	0.0422377	0.0412995	0.0484912	0.0550595	0.0433681	0.0270385	0.0528947	0.0508258	0.0388713	0.0391207	0.0352601	0.0389116	0.0459613	0.0454852	0.0367955	0.0490855	0.0493161	0.0504282	0.0500558	0.0530807	0.0458052	0.0461154	0.0501052	0.0518045	0.0526414	0.0432192	0.0391584	0.0452707	0.0528385	0.0380094
Peroxisome	0.0407063	0.0645188	0.0964977	0.0603821	0.0511306	0.111319	0.0996036	0.109206	0.0616782	0.0910606	0.0893853	0.103212	0.136049	0.0611767	0.0630485	0.0611983	0.0772718	0.0670019	0.077325	0.0705931	0.0791152	0.07912	0.0952039	0.0658117	0.0572651	0.0902621	0.0694422	0.0702238	0.0658062	0.0667553	0.0760624	0.0768933	0.0794665	0.0700508	0.0823274	0.0777661	0.082355	0.0818971	0.0854914	0.080776	0.0947196	0.0820921	0.07221	0.071665	0.0713721	0.0653367	0.0803744	0.071992	0.0688561
Valine, leucine and isoleucine degradation	0.0774785	0.0546429	0.129517	0.111804	0.115173	0.0702977	0.0676171	0.122613	0.0744621	0.0712512	0.0554731	0.0385454	0.0539815	0.0870608	0.0683312	0.0627841	0.0426951	0.0554188	0.0549708	0.0839224	0.0652785	0.0558113	0.0690194	0.0509835	0.0640336	0.0590856	0.0643822	0.0443313	0.0376751	0.0712556	0.0682684	0.0743327	0.0501526	0.0835237	0.0644279	0.0581275	0.0630181	0.0656596	0.0694164	0.0488893	0.0630211	0.0679093	0.0801858	0.0604569	0.0650418	0.0832269	0.1194	0.0819302	0.0615002
Tyrosine metabolism	0.0534815	0.0427283	0.182171	0.145366	0.140226	0.0533739	0.0313708	0.0703624	0.110767	0.046197	0.0527546	0.0529355	0.0530336	0.0492284	0.0480749	0.0566007	0.0363746	0.0565597	0.039754	0.0407404	0.0433865	0.0410305	0.0413123	0.0373971	0.0409182	0.0459361	0.0469492	0.0443374	0.0369548	0.0513681	0.0490958	0.0652891	0.0521333	0.0501013	0.0358209	0.0421257	0.0346598	0.0501767	0.0462729	0.0323898	0.0529253	0.040621	0.0434818	0.0433974	0.050761	0.048238	0.0463679	0.0500374	0.045962
Biosynthesis of secondary metabolites - unclassified	0.0410546	0.109782	0.0961557	0.119773	0.108408	0.083661	0.0151564	0.0132583	0.0602626	0.0561997	0.0690937	0.104477	0.00929879	0.148269	0.123624	0.17388	0.0779765	0.0867432	0.155055	0.067225	0.0950298	0.093441	0.0534364	0.122491	0.111787	0.0909283	0.0972095	0.0948718	0.13587	0.0973038	0.0943301	0.0833102	0.0963015	0.0910796	0.112369	0.132738	0.136519	0.100289	0.0990792	0.0956069	0.116287	0.0839189	0.111886	0.0875375	0.0740112	0.0690898	0.0569359	0.0974437	0.0951865
Lysine degradation	0.117792	0.0932844	0.0247981	0.0393233	0.0354032	0.0312421	0.0731148	0.0557314	0.0357837	0.0743339	0.0421624	0.0474374	0.0274302	0.267877	0.102816	0.0574799	0.0631218	0.0792425	0.0702744	0.118165	0.104643	0.0476594	0.083177	0.0724158	0.0454473	0.0913822	0.0475569	0.0366209	0.075396	0.0666977	0.0693065	0.0991179	0.06477	0.0450542	0.151464	0.0611469	0.0869116	0.0895365	0.0671998	0.0597988	0.0930626	0.0917323	0.111013	0.0797931	0.169121	0.103035	0.0869479	0.0825901	0.0717139
Glycosphingolipid biosynthesis - globo and isoglobo series	0.0608289	0.0575403	0.0198096	0.0498882	0.0617762	0.0310667	0.104078	0.0276146	0.0596962	0.10968	0.0934029	0.0902465	0.101884	0.0246465	0.0615991	0.0641221	0.0689457	0.117839	0.0677808	0.0738048	0.0819264	0.080083	0.0830442	0.0576033	0.0449109	0.0705825	0.0565203	0.0749473	0.0570952	0.073613	0.0625036	0.0463694	0.0739193	0.0756455	0.0859489	0.090107	0.0695716	0.0825274	0.07447	0.0764101	0.0702307	0.0798057	0.059413	0.0751748	0.0749267	0.083024	0.0835504	0.0935362	0.0974878
Glycosaminoglycan degradation	0.0640019	0.0547926	0.000230729	0.0414569	0.0572672	0.0132977	0.134045	0.0438026	0.0404324	0.11217	0.090358	0.0449408	0.0531149	0.0438993	0.0702814	0.068885	0.0437915	0.112345	0.0683634	0.0734157	0.0780078	0.0691696	0.0510219	0.0356407	0.0363324	0.0650734	0.0816958	0.0676216	0.0292366	0.0819311	0.0675127	0.0598384	0.0957351	0.0558097	0.0947989	0.0863691	0.0691472	0.0793872	0.0858702	0.08237	0.0765722	0.0920586	0.0757347	0.0723308	0.100719	0.093425	0.0795837	0.0972225	0.058869
Lysosome	0.101545	0.00104675	1	0.0644012	0.056332	0.0949236	0.26357	0.0625378	0.0528424	0.174099	0.0732338	0.0297943	0.111917	0.059369	0.0823221	0.0780165	0.0740003	0.100359	0.0906116	0.136581	0.118502	0.091932	0.0991933	0.0650669	0.0482679	0.0864437	0.0884027	0.0835353	0.0503084	0.0936618	0.0788386	0.0564578	0.0983322	0.0546572	0.10181	0.130211	0.101763	0.112921	0.111245	0.103486	0.101763	0.116553	0.0773959	0.0770662	0.12599	0.0975364	0.0922022	0.121343	0.0913384
Protein processing in endoplasmic reticulum	0.293262	0.200564	0.22301	0.13875	0.141044	0.0493259	0.0336514	0.00193266	0.130766	0.153854	0.109215	0.103303	0.0383905	0.173477	0.113824	0.120462	0.0374683	0.0909547	0.0692031	0.096044	0.137492	0.0815075	0.063352	0.0697097	0.0599863	0.0939456	0.100662	0.0960797	0.12828	0.1162	0.0573799	0.08949	0.096351	0.143173	0.122502	0.0857119	0.108065	0.108351	0.0666205	0.0994436	0.13094	0.11182	0.153353	0.172589	0.1245	0.0918823	0.083738	0.0994526	0.174975
Protein digestion and absorption	0.00810717	0.000554839	0.00643289	0.0694251	0.0271099	0.0113252	0.0221479	0.00944832	0.05166	0.125549	0.221592	0.193707	0.244959	0.0426132	0.0738633	0.0481899	0.0730412	0.0777826	0.0597839	0.106932	0.0912754	0.157748	0.169863	0.0409489	0.0522663	0.116063	0.0682443	0.0847226	0.0654774	0.0865833	0.0415198	0.0659825	0.0770755	0.0710645	0.0840619	0.0950516	0.0981823	0.11692	0.113062	0.0876803	0.110014	0.0909347	0.0617627	0.0868803	0.0898411	0.0747824	0.0860574	0.105476	0.113529
Necroptosis	0.0705358	0.0654628	0.0870124	0.0770281	0.0874879	0.130061	0.126123	0.116674	0.0711264	0.100582	0.0850297	0.106929	0.128405	0.0678024	0.0826088	0.100464	0.0969022	0.0974423	0.0951552	0.0867851	0.082773	0.088355	0.113256	0.119822	0.114411	0.0957535	0.117545	0.0914381	0.0897765	0.0689227	0.0880047	0.0948646	0.0761885	0.0678783	0.0859864	0.0927968	0.104525	0.091274	0.0967839	0.106631	0.0863441	0.106786	0.0897898	0.0685933	0.0744147	0.0846691	0.0912347	0.0780709	0.083477
Insulin resistance	0.0468482	0.0326002	0.0306939	0.0497275	0.036402	0.10685	0.0802783	0.123034	0.0698478	0.0986423	0.0534083	0.0524532	0.188668	0.0681783	0.0706381	0.0705076	0.0834165	0.0646687	0.0703389	0.0690193	0.0717761	0.103337	0.0906297	0.0993456	0.0643891	0.0683388	0.0825835	0.0754598	0.0756575	0.0729804	0.0713484	0.0714794	0.0764457	0.0860965	0.0675552	0.0684743	0.0923839	0.139068	0.0800108	0.0717142	0.0677066	0.0815253	0.073901	0.0650123	0.0635897	0.0737552	0.0791107	0.0780989	0.0742378
Glucagon signaling pathway	0.058529	0.0715707	0.0862009	0.0828909	0.0835838	0.0771038	0.0860081	0.0973673	0.129284	0.0928011	0.0613098	0.0745831	0.0803418	0.0516113	0.0799321	0.100249	0.0912133	0.0800771	0.087111	0.0925366	0.0745685	0.0767719	0.0739429	0.0923771	0.0910433	0.0860208	0.0922434	0.0675159	0.0667838	0.0765767	0.0662449	0.0797171	0.0690966	0.0782908	0.069103	0.0683099	0.076227	0.0727319	0.087285	0.0752354	0.07924	0.0721596	0.0706777	0.069368	0.0756415	0.0889751	0.100141	0.0788538	0.0732347
Monobactam biosynthesis	0.0608966	0.0372805	0.0463517	0.0606107	0.0552083	0.0752859	0.10647	0.0870247	0.0872663	0.104507	0.095416	0.0819217	0.140191	0.0877369	0.0839328	0.0698597	0.094489	0.0862114	0.108773	0.093661	0.0975434	0.114178	0.0883409	0.0872908	0.0904419	0.0931395	0.0772172	0.0942789	0.0851941	0.0852715	0.0852057	0.0814377	0.106504	0.102543	0.0902191	0.087961	0.0964863	0.0991491	0.101585	0.107057	0.0905422	0.0954585	0.0930842	0.0852994	0.091712	0.0847329	0.0955315	0.0949217	0.0821708
C5-Branched dibasic acid metabolism	0.118482	0.0630612	0.0477771	0.0638774	0.0640308	0.148118	0.125436	0.126237	0.140164	0.113601	0.128805	0.126527	0.164285	0.074086	0.110724	0.127872	0.152945	0.131265	0.128191	0.108439	0.117594	0.118146	0.123746	0.12375	0.132743	0.116855	0.12783	0.121294	0.113627	0.112451	0.120923	0.0896522	0.116192	0.104002	0.104164	0.11394	0.117755	0.120073	0.118016	0.142828	0.124458	0.120182	0.11888	0.0946668	0.0832834	0.116786	0.123958	0.112121	0.0954737
Phenylpropanoid biosynthesis	0.0199402	0.0688669	0.0323543	0.0525126	0.0335397	0.0228108	0.065501	0.0459591	0.138666	0.211812	0.0866101	0.0880402	0.233776	0.0370368	0.120635	0.0594542	0.167035	0.182172	0.084113	0.128975	0.20603	0.154009	0.140864	0.101291	0.0581607	0.113261	0.0482355	0.151636	0.111978	0.0862151	0.0789848	0.0900324	0.114877	0.0965747	0.144102	0.148618	0.153925	0.127492	0.131579	0.121311	0.098382	0.107051	0.113712	0.102243	0.148963	0.106112	0.114411	0.124201	0.15955
Thyroid hormone synthesis	0.104188	0.102328	0.155038	0.13038	0.131939	0.120894	0.0197436	0.945454	0.00604376	0.0395078	0.0512917	0.0672271	0.00802061	0.00711177	0.0444342	0.081518	0.00776468	0.0405769	0.0444954	0.0501588	0.021267	0.0119705	0.0132172	0.0472996	0.144232	0.0492379	0.0979174	0.0249689	0.0253202	0.112197	0.0498383	0.038052	0.0470276	0.0223058	0.0282358	0.0342648	0.029728	0.0220621	0.0204621	0.031727	0.0699509	0.0497168	0.0370367	0.0388368	0.0142822	0.0711636	0.0396458	0.0404136	0.0483788
Arachidonic acid metabolism	0.0193997	0.0384412	0.0483818	0.0370676	0.0313613	0.0482615	0.0181453	0.0111724	0.00176363	0.0207238	0.0352587	0.0350785	0.00605592	0.00452248	0.00825672	0.02159	0.00256422	0.015513	0.0122197	0.0164232	0.00557516	0.00648092	0.0132172	0.020181	0.0431524	0.0141421	0.0424087	0.0107674	0.0162175	0.0261761	0.0215991	0.0206907	0.0235961	0.00913072	0.0118057	0.024066	0.0150024	0.00576614	0.00701833	0.00482782	0.0271765	0.0218941	0.0168153	0.020269	0.00529459	0.0179262	0.019414	0.00462507	0.0153784
Apoptosis	1	1	0.00576102	0.0175269	0.0098595	0.00279105	0.00486354	0.00105363	0.0117025	0.0969371	0.117282	0.0762033	0.0274251	0.0344399	0.0409685	0.0477535	0.0135054	0.060655	0.0489732	0.0490541	0.0646879	0.0425958	0.0386651	0.0141698	0.0199883	0.0443088	0.0269187	0.0748455	0.0826116	0.064249	0.0276594	0.0268816	0.04467	0.0605377	0.0874437	0.0652349	0.0675934	0.0384662	0.0409262	0.0570774	0.0558354	0.0686548	0.043643	0.0858783	0.0655673	0.0649307	0.058093	0.0420602	0.0915305
Steroid hormone biosynthesis	1	1	1	0.0203564	0.0222919	0.00352335	0.0220407	1	0.00776826	0.0665156	0.00931091	0.00808433	0.00177049	0.0208097	0.0299348	0.0227617	0.0214975	0.0329404	0.0304062	0.0323393	0.0728322	0.0245736	0.0155037	0.010624	0.0245812	0.0320648	0.0212324	0.0128456	0.00429128	0.0348446	0.0419625	0.00738361	0.0481022	0.0189508	0.0592435	0.0533436	0.0427361	0.0274955	0.0274468	0.0375478	0.0450297	0.0431909	0.0328698	0.0328896	0.0394016	0.0341267	0.0296764	0.039965	0.0108656
Atrazine degradation	0.0484299	0.0291425	1	1	0.000272914	0.00160963	0.00328695	0.0138886	0.00505571	0.00513813	0.00194909	0.00261648	0.00240574	1	0.0164658	0.00535675	0.00550412	0.00325523	0.00751637	0.00699609	0.00818899	0.00267206	0.00745994	0.0161155	0.033249	0.0101366	0.00819277	0.0163717	0.0149404	0.00444023	0.00936398	0.0115619	0.00569479	0.0058891	0.00775371	0.0138737	0.00701098	0.00468593	0.00653553	0.0176658	0.00315045	0.0278991	0.0108888	0.00715769	0.00261376	0.0123371	0.00701998	0.00366258	0.00090789
Cholesterol metabolism	0.0267128	0.0192273	0.0473671	0.0450172	0.0468121	1	1	1	1	1	1	1	1	0.0066896	0.00322154	0.00169156	0.000818067	0.00116229	0.00370278	0.00333557	0.00184226	0.00757315	0.00228073	0.00256201	0.00349343	0.00620715	0.00650012	0.00250698	0.00704137	0.0123805	0.0036247	0.00507001	0.0119173	0.000886113	0.0125078	0.00220354	0.00108607	0.00675109	0.000564977	0.00463406	0.0103503	0.00318285	0.00532976	0.00348799	0.00505372	0.00794243	0.00342361	0.0035423	0.00155167
Neuroactive ligand-receptor interaction	0.0267128	0.0192273	0.0473671	0.0450172	0.0468121	1	1	1	1	1	1	1	1	0.0066896	0.00322154	0.00169156	0.000818067	0.00116229	0.00370278	0.00333557	0.00184226	0.00757315	0.00228073	0.00256201	0.00349343	0.00620715	0.00650012	0.00250698	0.00704137	0.0123805	0.0036247	0.00507001	0.0119173	0.000886113	0.0125078	0.00220354	0.00108607	0.00675109	0.000564977	0.00463406	0.0103503	0.00318285	0.00532976	0.00348799	0.00505372	0.00794243	0.00342361	0.0035423	0.00155167
Human T-cell leukemia virus 1 infection	0.0267128	0.0194761	0.0481587	0.0450172	0.0468121	0.000227327	1	1	1	1	1	1	1	0.00747681	0.00348276	0.00169156	0.000818067	0.00116229	0.00370278	0.00333557	0.00184226	0.00757315	0.00228073	0.00256201	0.00349343	0.00620715	0.00662235	0.00250698	0.00704137	0.0123805	0.0036247	0.00507001	0.0119173	0.000886113	0.0125078	0.00220354	0.00108607	0.00783763	0.000564977	0.00463406	0.0103503	0.00318285	0.00532976	0.00348799	0.00505372	0.00794243	0.00342361	0.0035423	0.00155167
Prion diseases	1	1	0.00358544	0.000738058	0.00273017	0.000384645	0.000628246	0.0051927	1	0.000703144	0.000182056	0.00142975	0.000313378	0.000454344	1	0.00104051	0.000795824	1	1	1	1	1	0.000848969	0.000284648	0.00087825	0.000127997	0.0031451	0.000252198	0.000396275	0.00180759	0.00414302	0.00164876	0.00444541	0.000270415	0.00521003	4.7e-05	0.000687981	0.000857294	7.26e-05	0.000236449	0.000859352	0.00105148	0.00119211	0.0023725	0.00161933	0.00450268	0.000775883	0.00211811	0.000586965
Mannose type O-glycan biosynthesis	1	0.000391381	0.00250509	0.00206327	0.00286555	0.00908553	0.00147169	0.0265052	1	1	0.000659643	0.000106424	1	0.00423036	0.00358982	0.00030767	0.000655354	0.00315034	0.000264916	0.00068794	0.000817266	0.0201818	0.00113117	0.00167679	0.00248256	0.000802379	0.000181427	0.000418946	0.00201702	0.00208063	0.00171706	0.00134291	0.00614921	0.00120385	0.0157628	0.00168025	0.00243964	0.00302098	0.00132448	0.00160807	0.00352872	0.00470225	0.00630788	0.00189221	0.00712858	0.00336336	0.00577738	0.00655923	0.00620671
Other types of O-glycan biosynthesis	1	0.000391381	0.00250509	0.00206327	0.00286555	0.00908553	0.00147169	0.0265052	1	1	1	0.000106424	1	0.00423036	0.00303738	0.00030767	0.000655354	0.00315034	0.000264916	0.00068794	0.000817266	0.0157998	0.000622978	0.00167679	0.00190462	0.000802379	0.000181427	0.000418946	0.00201702	0.0012641	0.00171706	0.00134291	0.00502398	0.00120385	0.0136768	0.00168025	0.00243964	0.00302098	0.00132448	0.00113317	0.00352872	0.00449104	0.00537168	0.00189221	0.00712858	0.00336336	0.00479715	0.00655923	0.00620671
Renin-angiotensin system	1	1	0.00136465	0.00236812	1	0.00636951	0.0966326	1	0.000458485	0.0159737	0.0108371	0.000259499	0.00872483	0.0271366	0.00674442	0.0145814	0.00168078	0.000651573	0.000482925	0.00294587	1	0.0082818	0.0185303	0.00218507	0.000983345	1	1	0.000143144	0.00412043	0.00236645	0.0028902	0.00434122	0.00546467	0.0019706	0.0342073	0.0130587	0.00622625	0.0078706	0.00126	0.00764417	0.00770691	0.00225267	0.00743888	0.0109974	0.0266416	0.0145505	0.00403774	0.00447103	0.00908241
[truncated: 532 more columns]
