# Supplementary material for: Metabolic and functional pathways of gut microbiota in patients with gastric cancer: The DELIVER trial (JACCRO GC-08)
Source: Research Square preprint supplement (doi:10.21203/rs.3.rs-7899663/v1), 2025-11-28
Supplement: Supplementary file 5 [file cce7d458a1466ce1725a03ca.xlsx]

## Sheet: Genus
Genus	GC08-001	GC08-002	GC08-003	GC08-004	GC08-005	GC08-006	GC08-007	GC08-008	GC08-009	GC08-010	GC08-011	GC08-013	GC08-014	GC08-015	GC08-016	GC08-017	GC08-018	GC08-019	GC08-020	GC08-021	GC08-022	GC08-023	GC08-024	GC08-025	GC08-026	GC08-027	GC08-029	GC08-030	GC08-031	GC08-032	GC08-033	GC08-034	GC08-035	GC08-036	GC08-037	GC08-038	GC08-039	GC08-040	GC08-041	GC08-042	GC08-043	GC08-044	GC08-045	GC08-046	GC08-047	GC08-048	GC08-049	GC08-050	GC08-051
Acaryochloris	0	0	0	0	0	0	0	0	0	0	0	0	0	0	0	0	0	0	0	0	0	0	0	0	0	0	0	0	0	0	0	0	0	0	0	0	0	0	0	0	0	0	0	0	0	0	0	0	0.0024496
Acetoanaerobium	0.0100749	0	0	0.0066072	0	0.00279861	0.00613346	0	0.00420221	0	0	0	0	0	0.00811754	0.00429461	0.009996	0.00582479	0.0100348	0.00419076	0.00582445	0	0	0	0.00756086	0.00549209	0	0.00306204	0.00289687	0.0051843	0.00770386	0	0	0	0	0	0	0	0.00409702	0	0	0.00610109	0	0	0	0	0	0	0.0024496
Acetobacter	0	0.00432732	0.00873973	0.0099108	0	0.00559722	0.00306673	0	0.00420221	0.00391527	0.00631552	0	0	0.00283817	0.00405877	0.00429461	0	0.00291239	0.00668986	0.00419076	0.00582445	0	0.00419533	0.00313421	0.00378043	0.00549209	0	0.00612407	0.00869061	0	0.00385193	0	0	0	0	0.00940601	0.00622084	0	0.00409702	0.00233514	0	0.00915164	0.00689061	0.00687498	0.00527037	0	0	0	0.0073488
Acetobacterium	0.0033583	0	0	0	0	0	0	0	0.00420221	0	0.00315776	0	0	0.00283817	0	0	0	0.00582479	0.00334493	0	0.00582445	0	0.00419533	0.00313421	0	0.00549209	0	0	0	0	0	0.0039763	0	0	0	0.004703	0	0	0.00409702	0	0.00323761	0	0.0103359	0	0	0	0	0	0
Acetohalobium	0	0	0.0131096	0	0.00507434	0.00559722	0	0	0	0	0.00315776	0.00527065	0	0.00283817	0	0.00429461	0.004998	0.00582479	0.00334493	0.00838153	0	0.00247568	0	0.00313421	0.00378043	0	0	0.00306204	0	0	0.00385193	0.0039763	0	0.00413496	0	0.00940601	0	0.00953653	0.00409702	0	0.00971282	0.00305055	0	0	0.00527037	0	0.00734646	0.00344828	0
Acetomicrobium	0	0	0	0	0	0	0.00306673	0	0.00420221	0	0	0	0	0	0	0	0	0	0	0	0	0	0.00839067	0	0.00378043	0.00549209	0	0	0	0	0	0.0039763	0	0	0	0	0	0	0.00409702	0	0	0.00305055	0	0	0	0	0.00367323	0	0.0024496
Acholeplasma	0.0033583	0	0.00436986	0.0066072	0.00507434	0	0	0	0.00420221	0.00391527	0.00947328	0.0105413	0	0.00283817	0.00405877	0	0.004998	0	0	0.00419076	0	0	0.012586	0.00626841	0	0.0219684	0.00929656	0	0.00289687	0.0051843	0	0	0.0122692	0.00826993	0	0.004703	0	0.00953653	0.0163881	0	0.00971282	0	0	0.00343749	0	0.0101153	0.00367323	0	0.012248
Achromobacter	0.0033583	0	0.0131096	0.0132144	0.00507434	0.00559722	0.0245339	0.0195351	0.00840442	0.0156611	0.0157888	0.00527065	0.00434461	0.00283817	0.0243526	0.0300623	0.009996	0.0116496	0.0167246	0	0.0116489	0.00495135	0.0461487	0.0219394	0.00378043	0.0274605	0.00619771	0	0.0318656	0.00259215	0.00770386	0.0159052	0	0	0	0.00940601	0	0.00953653	0.0327761	0.00467028	0.016188	0.0152527	0.0103359	0.00343749	0.00527037	0.0101153	0.0146929	0.00344828	0.0195968
Acidaminococcus	0.486953	0.0302912	1.31533	4.29138	0.0202974	0.0447778	0.0368008	0.0351631	0.0882464	0.0704749	0.066313	0.0474358	3.10206	0.0227053	2.61791	0.0858922	0.059976	0.0436859	0.832887	1.29914	0.0291223	0.198054	0.06293	2.92108	0.0151217	0.0439367	3.88286	0.0275583	0.173812	0.0233294	0.0231116	0.0357867	0.478498	0.442441	0	0.145793	0.0435459	1.23021	0.127008	0.0256865	0.346424	3.5966	0.0310078	0	0.252978	0	0.0550984	0.0448276	0.0391936
Acidianus	0	0	0	0	0	0	0	0	0	0	0	0	0	0	0	0	0	0	0	0	0	0	0	0	0	0	0	0	0	0	0	0	0	0	0	0	0	0.00476826	0	0	0	0	0	0	0	0	0	0	0
Acidihalobacter	0	0	0	0	0	0	0.00613346	0	0.00420221	0	0.00315776	0.00527065	0	0.00283817	0	0	0	0.00291239	0.00334493	0	0	0	0.00419533	0.00313421	0.00378043	0.0109842	0	0	0.00579374	0.00259215	0	0	0	0.00413496	0	0	0	0	0.00819404	0.00467028	0.00323761	0	0.00344531	0	0	0	0	0	0.0024496
Acidimicrobium	0	0	0	0	0	0	0	0.00390701	0	0	0	0	0.00434461	0	0	0	0	0	0	0.00419076	0	0	0	0	0	0	0	0	0	0	0	0	0	0	0	0	0	0	0	0.00233514	0	0.00305055	0	0	0	0	0.00367323	0.00344828	0
Acidiphilium	0	0	0	0	0	0	0	0	0.00420221	0	0	0	0	0	0	0	0	0	0	0	0	0	0	0.00313421	0	0	0	0.00306204	0	0	0	0	0	0	0	0	0	0	0	0	0	0.00305055	0.00344531	0	0	0	0	0.00344828	0.0024496
Acidipropionibacterium	0	0	0.00436986	0	0	0	0	0	0.00420221	0.00391527	0.00631552	0	0	0	0	0.00429461	0.004998	0	0	0	0.00582445	0	0.00419533	0	0	0	0.00309885	0.00306204	0	0	0	0	0	0.00413496	0	0.00940601	0.00622084	0	0.00819404	0.00700542	0	0.00305055	0.00344531	0	0	0	0	0	0
Acidithiobacillus	0.0033583	0	0	0.0033036	0	0	0.00306673	0	0.00840442	0	0	0	0.00434461	0	0	0	0	0.00582479	0.00334493	0	0.00582445	0	0	0.00313421	0	0.0109842	0	0.00306204	0.00289687	0.00259215	0.0115558	0	0.0184038	0	0	0.004703	0.00622084	0	0.00819404	0	0	0.00305055	0.00689061	0	0	0	0	0.0103448	0.0024496
Acidobacterium	0	0	0.00436986	0.0099108	0	0.00279861	0	0	0	0.00391527	0.00315776	0	0	0	0	0	0	0.00291239	0	0	0	0	0	0	0	0.00549209	0.00309885	0.00306204	0.00289687	0.00259215	0.00385193	0	0.00613459	0	0	0	0.00622084	0	0	0.00233514	0	0	0.00344531	0	0	0	0.00367323	0	0
Acidothermus	0	0	0	0	0	0	0	0	0	0.00391527	0.00315776	0	0	0	0	0	0	0	0	0	0	0	0	0	0	0	0	0	0.00289687	0	0	0	0.00613459	0	0	0.004703	0	0	0	0.00233514	0	0	0	0	0	0	0	0	0
Acidovorax	0.00671659	0	0.0131096	0.0066072	0	0.00559722	0.0122669	0.0234421	0.00420221	0.00783055	0.00947328	0	0	0.00283817	0.00811754	0	0.004998	0.00582479	0.0100348	0.0125723	0.00582445	0.00495135	0.00419533	0	0.00756086	0.0274605	0.00619771	0.00612407	0.0115875	0	0.00385193	0.0079526	0.0122692	0.00413496	0	0.014109	0.0124417	0.00953653	0.00819404	0.00700542	0.00971282	0.00915164	0.0172265	0.00343749	0	0	0.00734646	0.00344828	0.012248
Acinetobacter	0	0.00432732	0.0131096	0	0.00507434	0.00279861	0.0092002	0.011721	0.0168088	0	0.012631	0	0.00434461	0	0.00405877	0.00429461	0	0.00291239	0	0.0125723	0	0.00247568	0	0.00626841	0.00378043	0.0109842	0.00929656	0.00306204	0.00289687	0.0051843	0.00770386	0	0	0.00413496	0	0	0	0.0190731	0.00819404	0.00233514	0.00323761	0.00610109	0.00689061	0.00343749	0.00527037	0	0	0.00689655	0.0048992
Actinoalloteichus	0	0	0.00873973	0.0033036	0	0.00279861	0	0	0	0.00391527	0	0	0	0.00283817	0	0.00429461	0.004998	0.00291239	0	0	0	0	0.00839067	0	0	0	0	0.00306204	0	0	0.00385193	0	0	0	0	0.004703	0	0	0	0	0.00647522	0	0.00689061	0	0	0	0.00734646	0	0.0024496
Actinobacillus	0	0.0259639	0	0.0033036	0.00507434	0	0	0	0.00420221	0	0	0	0	0.00567634	0	0	0	0.00582479	0.00334493	0	0	0.00495135	0	0.00313421	0	0.00549209	0.00309885	0	0.00289687	0.0051843	0	0	0	0.00413496	0	0.004703	0	0.00476826	0	0	0.00323761	0	0	0	0.00527037	0	0.00367323	0	0.0024496
Actinomyces	0.0503745	0.0908737	0.0393288	1.26528	0.015223	3.67458	0.0705348	0.0664192	1.42455	0.0548138	0.0536819	0.0368945	0	0.0227053	0.247585	0.309212	0.219912	0.186393	0.100348	0.444221	2.44044	1.56463	0.0419533	0.0313421	0.824134	0.0494288	0.0278897	0.0122481	0.0637312	0.235886	0.184893	0.0278341	7.95657	0.831128	1.30738	0.790105	2.19596	0.195499	1.42167	0.114422	0.155405	2.54721	0.0378984	0.934997	0.179193	1.52741	0.191008	1.60345	0.036744
Actinoplanes	0.0033583	0	0.00436986	0.0099108	0	0.00559722	0.00613346	0.011721	0.00420221	0.00391527	0.00631552	0	0.00434461	0	0.00405877	0	0.009996	0.00291239	0.00334493	0	0.00582445	0	0.00839067	0.00626841	0	0	0	0	0.00579374	0	0	0	0.00613459	0	0	0.00940601	0.00622084	0.00476826	0.0163881	0.00700542	0	0.00305055	0.00689061	0.00343749	0.00527037	0	0.00734646	0.00344828	0.012248
Actinopolymorpha	0	0	0.00436986	0	0	0	0	0	0	0.00783055	0.00315776	0	0	0.00283817	0.00405877	0	0	0.00873718	0	0	0	0.00247568	0	0	0	0	0	0	0.00579374	0.00259215	0	0.0039763	0.0122692	0	0	0.004703	0	0.00476826	0.00409702	0.00233514	0	0.00305055	0.00344531	0	0	0	0.00367323	0.00344828	0.0048992
Actinopolyspora	0	0	0.00436986	0	0	0	0	0.00781403	0.00420221	0.00391527	0	0	0	0	0.00811754	0.00429461	0	0.00291239	0	0	0	0	0.00419533	0	0	0	0.00929656	0	0.00289687	0	0.00385193	0.0039763	0	0.00826993	0	0	0	0	0	0.00233514	0	0	0.0103359	0	0	0	0	0.00344828	0
Actinosynnema	0	0	0	0.0033036	0	0	0	0	0	0	0	0	0	0	0.00405877	0	0.004998	0	0	0	0.00582445	0	0.00419533	0	0	0.00549209	0	0	0.00289687	0.00259215	0	0	0	0	0	0	0	0	0	0	0.00323761	0.00305055	0	0	0	0	0	0	0
Actinotignum	0	0	0	0	0	0	0	0	0	0	0.00315776	0	0	0	0	0	0	0	0	0	0	0	0	0	0	0	0.00309885	0	0	0	0	0	0	0	0	0.004703	0	0	0.00409702	0	0	0	0	0	0	0	0	0.00344828	0
Adlercreutzia	0.0638076	0.00432732	0.638	0.0363396	2.99893	2.92455	1.73884	0.0195351	0.0588309	0.0822207	0.176835	0.0158119	0.0260677	0.0198672	0.0405877	0.0386515	4.46321	0.0524231	0.0167246	0.0335261	0.535849	0.0792216	0.025172	0.777283	0.00756086	0.060413	0.678649	0.00612407	0.199884	0.0259215	0.0385193	0.0318104	0.00613459	0	0	0.0799511	0.0870918	0.0286096	0.0655523	0.0443676	0.0194256	0.0884659	0.0413437	0.0859372	0.0263518	0.0101153	1.47664	0.0310345	0.048992
Advenella	0	0	0.00873973	0.0066072	0	0	0.00306673	0	0	0	0	0	0	0.00283817	0	0	0.009996	0	0.00668986	0.00419076	0	0	0.00419533	0.00313421	0	0	0.00309885	0	0	0	0	0	0	0	0	0	0.00622084	0	0.00409702	0.00233514	0	0	0	0	0.00527037	0	0	0	0.0048992
Aequorivita	0	0	0	0	0.00507434	0	0	0	0.0126066	0	0	0.00527065	0	0.00283817	0	0	0	0.00291239	0	0	0	0.00247568	0.00419533	0.00313421	0	0	0	0.00612407	0	0	0	0	0	0	0	0	0	0	0	0.00233514	0	0.00610109	0	0	0	0	0	0	0
Aeribacillus	0	0	0	0	0	0.00279861	0	0	0.00420221	0.00391527	0.00315776	0	0	0	0	0.00429461	0	0	0.00334493	0	0.00582445	0	0	0	0	0	0	0	0	0	0	0	0	0	0	0	0	0.00476826	0	0	0	0	0	0.00343749	0	0	0	0	0.0024496
Aerococcus	0	0.00865464	0.00873973	0.0099108	0	0.0139931	0.00613346	0.00390701	0	0	0.0221043	0.0105413	0	0.00567634	0	0	0.009996	0.00582479	0.00334493	0.00838153	0.0116489	0.00247568	0.00419533	0.00940262	0.0113413	0.00549209	0.0154943	0.00612407	0.00869061	0.0233294	0.00385193	0.0039763	0.0122692	0.00413496	0	0.018812	0.0186625	0.00953653	0.00819404	0.00934056	0.00323761	0.00305055	0.00689061	0.00687498	0.00527037	0.0202306	0.00367323	0	0.0097984
Aeromicrobium	0.0033583	0	0.0131096	0	0	0	0	0	0.00420221	0	0.00315776	0	0	0	0.00405877	0	0	0.00291239	0	0	0.00582445	0	0	0	0	0	0	0.00306204	0.00869061	0	0	0.0039763	0.00613459	0.00826993	0	0	0	0.00476826	0.00409702	0	0	0	0.0103359	0	0	0	0	0	0.0048992
Aeromonas	0.0201498	0.0173093	0.0524384	0.0396432	0.00507434	0.00559722	0.564279	0.0273491	0.0504265	0.0156611	0.0284199	0.0105413	0.0130338	0.0085145	0.0324702	0.0214731	0.02499	0.014562	0.0334493	0.0209538	0.0232978	0.00990271	0.0293673	0.0282079	0.0151217	0.0659051	0.00929656	0.0183722	0.0434531	0.0155529	0.0231116	0.0278341	0.0184038	0.0124049	0	0.018812	0.0124417	0.0286096	0.0614553	0.0303568	0.0194256	0.0427077	0.0103359	8.39435	0.00527037	0.0101153	0.0257126	0.0344828	0.0391936
Afipia	0	0	0	0	0	0	0	0	0	0.00391527	0	0	0	0	0	0	0	0	0	0	0	0	0.00419533	0	0	0	0	0.00306204	0.00289687	0	0	0	0	0	0	0	0	0	0	0.00233514	0	0	0	0	0	0	0	0	0.0024496
Agarilytica	0	0	0.00436986	0	0	0	0	0	0.00420221	0	0	0	0	0	0	0	0.004998	0	0	0.00419076	0	0	0.00419533	0.00313421	0	0.00549209	0.00309885	0	0.00289687	0	0	0	0	0.00413496	0	0	0	0	0	0	0	0.00305055	0	0.00343749	0	0	0	0	0.0024496
Agarivorans	0.0033583	0	0	0	0	0.00279861	0	0.00390701	0	0.00391527	0	0	0	0	0	0	0	0	0	0.00419076	0.00582445	0	0	0	0	0.00549209	0	0	0	0	0	0	0.00613459	0	0	0	0	0	0	0	0	0	0	0	0	0	0	0	0.0024496
Aggregatibacter	0	1.679	0.00436986	0	0.00507434	0	0	0.00390701	0	0	0.00631552	0	0	0.034058	0	0	0	0.00582479	0	0.00419076	0.0116489	0	0.00419533	0.00313421	0.026463	0	0.0309885	0	0	0.0648038	0.053927	0	0	0.124049	0	0	0.00622084	0.0619874	0	0	0.0550393	0.00305055	0.00344531	0.00343749	0.0105407	0	0	0	0
Agrobacterium	0.0033583	0	0.0174795	0.0099108	0.00507434	0.00559722	0.00306673	0.011721	0.0252133	0.0156611	0.012631	0	0	0.00567634	0.0121763	0.00858922	0.004998	0.00873718	0.00668986	0.00419076	0	0.00495135	0.00419533	0.00940262	0	0.0109842	0.00929656	0.00306204	0.00579374	0.00777645	0	0.0079526	0.00613459	0	0	0.018812	0	0.00953653	0.0122911	0.00467028	0.00647522	0.00610109	0.0137812	0.00343749	0.00527037	0	0.00734646	0	0.0024496
Agrococcus	0	0	0.00873973	0.0066072	0	0.00279861	0.00306673	0	0.00420221	0.00391527	0	0	0	0	0.00405877	0	0.009996	0	0	0.00419076	0.00582445	0	0.00419533	0.0125368	0	0	0	0.00306204	0.00289687	0	0	0.0079526	0.00613459	0	0	0.004703	0	0.0143048	0.00409702	0.00467028	0.00323761	0.00305055	0	0	0	0	0.00367323	0	0.0024496
Agromyces	0	0	0	0	0	0	0	0	0.00420221	0	0	0	0	0	0.00405877	0	0.004998	0	0	0	0.00582445	0	0	0	0	0	0	0	0	0	0	0	0.0122692	0	0	0	0	0	0.00409702	0	0	0	0	0	0	0	0	0	0
Akkermansia	0.0167915	0	3.12008	0.0231252	0.00507434	0.00279861	0.0092002	0.00390701	0.00840442	0.00783055	1.86939	0.00527065	2.81097	0.23273	1.27445	0.523942	3.65854	2.18721	0.00334493	0.00838153	6.11567	0.0693189	0.0167813	0.0344763	0	0.0109842	0.00619771	0.269459	0.00869061	0.816528	4.41046	0.143147	0.00613459	0.00826993	0	0.014109	0	0.0238413	0.0286791	0.00700542	0.00971282	0.0122022	0.0861326	0.00343749	0.205544	0	0.00734646	0.193103	0.0955344
Alcaligenes	0.0033583	0	0.00436986	0	0.0101487	0.00559722	0.0092002	0.00781403	0	0.00391527	0.00631552	0.00527065	0	0.00567634	0.00405877	0	0.004998	0	0.00334493	0	0.0116489	0.00247568	0.00419533	0.00626841	0	0.00549209	0.00309885	0.00306204	0.00289687	0.00259215	0	0	0	0	0	0.00940601	0	0.00476826	0	0.00233514	0	0.00610109	0	0.00343749	0	0	0	0	0.0024496
Alcanivorax	0.0033583	0	0	0.0066072	0	0	0.00306673	0.0234421	0.00840442	0.00391527	0.00631552	0	0	0.00283817	0.0121763	0.00429461	0.004998	0.00291239	0.00334493	0.00419076	0.0116489	0	0.00419533	0.00626841	0.00378043	0.00549209	0.0123954	0	0.00289687	0	0.00770386	0.0119289	0	0	0	0.004703	0.0124417	0.00953653	0.0122911	0.00467028	0.00647522	0.00305055	0.00689061	0	0	0	0.0110197	0.00689655	0.0171472
Algibacter	0	0	0	0	0	0	0	0	0	0	0	0	0	0	0	0	0	0	0	0	0	0	0	0	0	0	0	0	0	0.00259215	0	0	0	0	0	0	0.00622084	0	0	0.00233514	0	0	0	0.00343749	0	0	0	0	0
Algoriphagus	0.0033583	0	0.00436986	0.0033036	0.00507434	0.00279861	0	0.00390701	0.00420221	0	0.00315776	0	0	0.00283817	0	0	0	0.00582479	0	0.00419076	0	0	0.00419533	0.00313421	0	0	0	0.00306204	0	0.00259215	0.00385193	0	0.00613459	0	0	0.004703	0	0	0	0.00233514	0.00647522	0	0	0	0.0105407	0	0	0	0.0024496
Alicycliphilus	0	0.00432732	0	0	0	0	0.00613346	0	0.00840442	0	0	0	0	0	0	0.00429461	0	0	0.00334493	0	0	0	0.00419533	0.00313421	0	0.00549209	0.00309885	0	0.00579374	0	0	0	0.0122692	0	0	0	0	0.00476826	0.00409702	0.00467028	0.00647522	0.00610109	0	0	0	0	0.00367323	0.00689655	0
Alicyclobacillus	0.0100749	0	0.00436986	0.0132144	0.00507434	0.00279861	0.00306673	0.00390701	0.00840442	0.00783055	0.012631	0	0.00434461	0	0.00405877	0.00858922	0.004998	0.0116496	0	0.00419076	0	0.00247568	0.00839067	0.00626841	0	0.0219684	0.00619771	0.00306204	0.00869061	0.0051843	0.00385193	0	0	0.00413496	0	0.004703	0	0.00953653	0.00819404	0.00700542	0	0.00610109	0.00344531	0	0	0.0101153	0	0.00689655	0.0024496
Aliivibrio	0	0	0	0.0033036	0.00507434	0	0	0	0	0	0	0	0	0	0	0.00429461	0	0.00291239	0.00334493	0	0	0	0	0.00313421	0	0	0	0	0.00289687	0	0	0	0	0	0	0	0	0	0	0	0.00647522	0.00305055	0	0	0.00527037	0	0	0	0
Alistipes	5.33969	4.34463	2.35973	5.8705	0.0608921	0.870368	1.75417	2.99277	5.67298	1.47606	1.79992	0.0527065	0.0521354	0.190157	4.43218	0.0944814	2.35406	6.50338	4.0206	0.93035	0.0524201	2.68858	6.62863	6.3499	4.56298	0.324033	10.8274	4.34197	5.44322	7.8283	9.76465	2.22275	0.0736151	0.570625	0	1.82006	0.136858	0.0572191	0.352343	6.50803	0.896817	2.57771	6.75624	0.508748	3.54696	0	14.2999	8.85517	5.31318
Alkalilimnicola	0.0033583	0	0.00873973	0.0033036	0	0.00279861	0.00306673	0.00781403	0.00840442	0.00391527	0.00631552	0	0	0.00283817	0.0121763	0.00858922	0.004998	0	0	0	0.00582445	0	0.00419533	0	0.00756086	0	0.00309885	0	0.00289687	0.0051843	0	0.0039763	0	0	0	0	0.0124417	0.00476826	0.00409702	0	0.00323761	0.00610109	0	0.00687498	0	0	0.0110197	0	0.0073488
Alkaliphilus	0	0	0.00436986	0.0132144	0	0.00559722	0	0.00390701	0.00840442	0	0	0.0158119	0.00434461	0.00567634	0.00405877	0.00429461	0.014994	0	0.00668986	0.00419076	0.0174734	0	0	0.00626841	0.00378043	0.0109842	0.00929656	0.00612407	0.00289687	0.0181451	0.0115558	0	0.00613459	0.0124049	0	0.004703	0.0311042	0	0	0.00467028	0.0194256	0.0122022	0.00344531	0.0206249	0	0	0.0110197	0	0.0048992
Alkalitalea	0	0.00432732	0.00436986	0	0.00507434	0.00559722	0.00613346	0	0.00420221	0	0.00315776	0	0	0	0	0	0	0.00582479	0.00334493	0	0	0.00247568	0.00419533	0	0	0	0	0	0	0.0051843	0	0	0	0	0	0.004703	0	0	0	0	0.00323761	0	0.00689061	0	0.00527037	0	0	0.00689655	0.0073488
Alloactinosynnema	0.0033583	0	0.00436986	0	0	0	0.00306673	0	0.00420221	0	0	0.00527065	0	0	0	0	0	0	0	0	0	0	0	0.00313421	0	0	0.00309885	0	0	0	0	0	0.00613459	0.00413496	0	0	0	0.00476826	0.00409702	0	0	0	0	0	0.00527037	0	0	0	0
Allochromatium	0	0	0	0.0066072	0	0	0	0.00390701	0	0	0	0	0	0.00567634	0	0	0	0	0	0.00419076	0	0	0	0.00313421	0	0	0.00309885	0.00306204	0.00289687	0	0	0	0	0	0	0	0	0	0	0.0116757	0	0.00305055	0	0.00343749	0	0	0	0.00689655	0.0048992
Allofrancisella	0	0	0	0	0	0	0	0	0	0	0	0	0	0	0	0	0	0	0	0	0	0	0	0	0	0	0	0	0	0	0	0	0	0.00413496	0	0	0	0	0	0	0	0	0	0	0	0	0	0	0
Allokutzneria	0	0	0	0.0033036	0	0	0	0	0	0	0	0	0	0	0	0	0	0	0	0	0	0	0	0.00313421	0	0	0	0	0	0	0	0	0	0	0	0	0	0	0	0	0	0	0	0	0	0	0	0	0
Alphabaculovirus	0	0	0	0	0	0	0	0	0	0	0	0	0	0	0	0.00429461	0	0	0	0	0	0	0	0	0	0	0	0	0	0	0	0	0	0	0	0	0	0	0	0	0.00323761	0	0	0	0	0	0	0	0
Altererythrobacter	0.0033583	0	0.0262192	0	0	0.00559722	0.00306673	0.00390701	0.00840442	0.00783055	0.00315776	0	0.00434461	0.00567634	0.00811754	0.00858922	0.009996	0.00291239	0.00334493	0.0167631	0.0174734	0.00247568	0	0.00626841	0	0	0.00309885	0.00306204	0.00579374	0	0	0	0	0.00413496	0.0290529	0.004703	0	0	0.0122911	0.00233514	0.00647522	0.00915164	0	0.00343749	0	0	0.00367323	0.0103448	0.0024496
Alteromonas	0	0.00432732	0	0	0	0	0	0	0	0.00391527	0	0	0	0	0.00405877	0	0	0	0	0.00419076	0	0	0	0	0	0	0	0	0	0	0.00385193	0	0	0	0	0	0.00622084	0	0	0.00233514	0	0	0	0	0	0.0101153	0	0	0
Aminobacter	0	0	0	0	0	0	0.00306673	0.00390701	0.0126066	0.0117458	0.00315776	0	0	0.00567634	0.00405877	0.00429461	0	0	0.00334493	0	0	0	0.0167813	0	0	0.0109842	0.00929656	0.00306204	0.00289687	0	0.00385193	0.0039763	0	0	0	0.00940601	0	0.00953653	0.00409702	0.00233514	0.00323761	0.00305055	0	0.00343749	0.00527037	0	0	0	0
Aminobacterium	0	0	0	0	0	0.00279861	0	0.00390701	0	0	0	0	0	0	0	0.00429461	0.009996	0.00291239	0	0	0	0	0.00419533	0.00626841	0	0	0	0.00306204	0.00289687	0.0051843	0.00385193	0.0039763	0	0	0	0	0	0.00476826	0	0.00233514	0	0	0	0.00343749	0	0	0	0	0
Aminomonas	0	0	0.0218493	0.0066072	0	0	0	0.00390701	0	0.00783055	0.00947328	0	0	0.00283817	0.0121763	0	0.004998	0.00582479	0	0.0209538	0	0.00247568	0.012586	0.00313421	0	0.00549209	0.00309885	0.00306204	0.00289687	0.0051843	0.00770386	0.0159052	0	0	0	0	0	0.0143048	0.0122911	0.0140108	0.00647522	0.00305055	0.0137812	0	0.0105407	0	0.00734646	0.00344828	0.0073488
Ammonifex	0	0	0.00436986	0	0	0	0	0	0	0	0	0	0	0	0.00811754	0	0.004998	0	0	0	0	0	0	0	0	0	0	0	0	0.00259215	0	0	0	0	0	0	0	0	0	0.00233514	0.00323761	0.00305055	0	0	0	0	0	0.00344828	0
Amphibacillus	0.0033583	0	0	0	0	0	0	0.00390701	0.00420221	0.00391527	0.012631	0	0	0	0	0	0	0.00291239	0.00668986	0.00419076	0	0	0.00419533	0.00626841	0	0	0.00309885	0	0	0	0	0.0039763	0	0	0	0	0.00622084	0	0	0	0.00323761	0.00305055	0	0	0	0	0.00367323	0	0.0024496
Amycolatopsis	0	0	0.00873973	0.0099108	0	0	0	0.00781403	0.00840442	0.0117458	0	0	0	0	0.00405877	0	0.004998	0.00291239	0	0.00419076	0.00582445	0	0	0	0.00378043	0	0.00619771	0	0.0144844	0.00259215	0	0	0	0.00413496	0	0	0.00622084	0.0143048	0.00409702	0.00467028	0	0.00305055	0.00344531	0.00687498	0	0	0	0.00344828	0.0073488
Anabaena	0	0	0	0	0	0	0	0	0	0	0	0	0	0	0	0	0	0.00291239	0	0	0.0116489	0	0	0	0	0	0	0	0	0	0.00385193	0	0	0	0	0	0	0	0	0.00233514	0.00323761	0	0	0	0	0	0	0	0
Anaerococcus	0.0033583	0	0.423877	0.0033036	0	0.0139931	0.00613346	0.00390701	0.0168088	0	0	0.00527065	0.0130338	0.00567634	0.00405877	0.00858922	0.014994	0	0.00668986	0	0	0	0.00419533	0.00313421	0	0.00549209	0.00309885	0.0122481	0.00869061	0.00777645	0.00385193	0	0	0.00413496	0	0.004703	0	0.00476826	0.00409702	0.00233514	0.00323761	0	0.00344531	0.00343749	0.0105407	0.293344	0	0.00344828	0.0073488
Anaerolinea	0	0	0	0	0	0.00279861	0.00306673	0	0	0	0	0	0	0.00283817	0	0	0	0.00291239	0	0	0	0	0	0.00626841	0	0	0	0	0	0	0	0.0039763	0	0.00413496	0	0	0	0	0	0	0	0.00305055	0	0	0	0	0	0	0.0024496
Anaeromyxobacter	0.0033583	0	0.0218493	0	0	0.0111944	0.00306673	0	0.0126066	0.00783055	0.00631552	0	0.00868923	0.00283817	0.0121763	0.00429461	0.009996	0.014562	0.00668986	0.0251446	0.00582445	0	0.00839067	0.00940262	0.00378043	0	0.00309885	0	0.0173812	0.0129608	0	0.039763	0	0	0	0.004703	0.00622084	0.00953653	0.00819404	0.00467028	0.00647522	0.00305055	0.00689061	0	0	0	0.0110197	0.0137931	0.012248
Anaerostipes	5.64866	0.116838	3.01521	0.693756	0.761151	2.85738	0.711482	0.52354	0.83624	0.469833	0.299987	3.32051	0.0912369	4.52404	6.10845	2.61112	5.7527	0.463071	0.541879	4.16981	5.60312	0.245092	4.4974	1.48875	4.83517	4.47056	0.83669	1.00741	4.97972	0.406968	2.96984	0.560658	0.282191	4.0564	0	2.87354	0.273717	2.46996	1.27827	0.399309	0.433839	2.2025	0.788975	0.567186	1.22273	0.343921	0.282839	1.03793	3.62051
Anaerotignum	0.0638076	0.125492	0.0262192	0.0099108	0.00507434	0.0279861	0.113469	0.234421	0.0126066	0.0978818	0.123153	0.0105413	0.182474	0.0993359	0.0568228	0.0558299	0.039984	0.0320363	0.0903131	0.0209538	0.168909	0.00495135	0.130055	0.015671	0.0793891	0.0274605	0.102262	0.107171	0.023175	0.0259215	0.0231116	0.039763	0	0.0289448	0	0.023515	0.242613	0.185962	0.0286791	0.0210163	0.0809402	0.033556	0.00344531	0.0893747	0.0158111	0.0202306	0.10285	0.00689655	0.0171472
Anaplasma	0	0	0	0	0	0	0	0	0	0	0	0	0	0	0	0	0	0	0	0	0	0	0	0	0	0	0	0	0	0	0	0	0	0	0	0	0	0	0	0	0	0	0	0	0	0	0	0	0
Aneurinibacillus	0.0033583	0	0.00436986	0.0033036	0.00507434	0.0111944	0	0.00781403	0.00420221	0.00391527	0	0	0	0	0.00405877	0	0	0.00582479	0.0100348	0.00419076	0.0174734	0.00247568	0.00419533	0.0125368	0.00756086	0	0.00929656	0.00918611	0.00289687	0.0051843	0.00770386	0.0119289	0.0122692	0.00413496	0	0.004703	0	0.00953653	0.00819404	0.00233514	0.00647522	0.00610109	0.00344531	0.00343749	0	0	0	0.0103448	0.012248
Anoxybacillus	0.0100749	0.00432732	0.00436986	0.0033036	0.00507434	0.00279861	0.00613346	0	0	0.00783055	0.00947328	0	0.00434461	0.00283817	0.00811754	0	0.014994	0.00582479	0.00668986	0.00838153	0.00582445	0.00247568	0	0.00626841	0.00378043	0.00549209	0.00309885	0.00612407	0.00869061	0.0103686	0.00385193	0.0079526	0.0122692	0.00413496	0	0.00940601	0.0124417	0.0143048	0.00409702	0.00700542	0.00971282	0	0.00689061	0.00343749	0.0158111	0	0	0	0.0073488
Antarctobacter	0	0	0	0	0	0	0	0	0	0	0.00315776	0	0	0	0	0	0	0.00291239	0	0	0	0	0	0	0	0	0	0	0	0	0.00385193	0	0	0	0	0	0	0	0	0	0	0	0	0	0.00527037	0	0	0	0
Aquaspirillum	0.00671659	0	0.00436986	0	0	0.00279861	0.00306673	0.00390701	0	0	0	0	0	0.00283817	0.00405877	0	0.004998	0.00291239	0	0.00419076	0.00582445	0	0.00419533	0.00313421	0	0.00549209	0.00309885	0	0	0	0.00770386	0.0079526	0.00613459	0	0	0	0.00622084	0	0	0.00233514	0.00323761	0.00610109	0.00344531	0	0	0	0.00367323	0.00344828	0.0024496
Aquifex	0	0	0	0	0	0	0	0	0	0.00391527	0	0	0	0	0	0	0	0	0	0	0	0	0	0	0	0	0	0	0	0	0	0	0	0	0	0	0	0	0	0	0	0	0	0	0	0	0	0	0
Aquiflexum	0	0	0	0.0033036	0	0	0	0	0.00420221	0	0	0	0	0	0	0	0	0	0	0.00419076	0	0	0.00839067	0	0	0.00549209	0.00309885	0.00306204	0	0	0	0	0	0	0	0	0	0	0.00819404	0.00233514	0	0	0.00344531	0	0	0	0	0	0
Arachidicoccus	0.0033583	0	0	0	0	0.00279861	0.00306673	0	0.00420221	0.00391527	0	0.00527065	0	0	0	0	0.004998	0	0	0	0	0	0.00419533	0.00313421	0	0	0	0	0.00289687	0.0051843	0.00385193	0	0	0	0	0.004703	0	0	0	0	0	0	0	0.00343749	0	0	0.00367323	0.00344828	0
Arcanobacterium	0	0	0.00436986	0.0066072	0	0	0	0	0.00420221	0	0	0	0.00434461	0	0.00811754	0	0.014994	0.00582479	0	0	0.00582445	0	0.00419533	0.00313421	0	0.00549209	0.00309885	0	0	0.00259215	0	0	0	0.00413496	0	0	0	0.00476826	0.00819404	0	0	0	0	0	0	0	0	0	0
Archaeoglobus	0	0	0	0	0	0	0	0	0	0	0	0	0	0	0.00405877	0	0	0	0	0	0	0	0	0	0	0	0	0	0	0	0	0	0	0	0	0	0	0	0	0	0	0	0	0	0	0	0	0	0
Archangium	0	0	0.00436986	0.0033036	0	0.00279861	0.00613346	0.00390701	0	0	0	0	0	0.00283817	0.00811754	0.00429461	0	0.00582479	0.00334493	0.00838153	0	0.00495135	0.00419533	0.0125368	0	0.0164763	0.00619771	0.00612407	0.00289687	0.00259215	0	0.0079526	0	0	0	0	0	0	0.00409702	0.00700542	0.00323761	0.0122022	0	0	0.00527037	0	0.00734646	0.00344828	0.0048992
Arcobacter	0	0	0.00873973	0	0	0	0	0	0.0126066	0.00391527	0.00315776	0	0	0	0	0	0.009996	0.00582479	0.00334493	0	0.00582445	0	0	0.00626841	0.00378043	0.0109842	0.00309885	0.00306204	0.00579374	0.0103686	0	0	0	0	0	0	0.00622084	0.00953653	0.00409702	0.00467028	0.00323761	0	0	0.0103125	0	0.0101153	0.00367323	0	0
Arenibacter	0.0033583	0	0	0.0033036	0	0	0	0.00781403	0	0.00783055	0	0	0	0	0	0	0	0	0	0	0	0.00247568	0.00839067	0	0	0	0	0.00306204	0.00289687	0.0051843	0	0	0	0	0	0.004703	0	0.00476826	0.00819404	0.00233514	0	0	0	0	0.00527037	0	0	0	0.0024496
Aromatoleum	0	0	0	0	0	0.00279861	0	0	0.00840442	0	0	0	0	0	0	0	0.004998	0.00291239	0	0.00838153	0	0	0	0	0	0	0	0	0	0	0	0.0039763	0	0.00413496	0	0	0	0	0	0	0	0.00305055	0.00344531	0	0	0	0	0.00344828	0
Arsenicicoccus	0	0	0	0	0	0	0	0	0.00840442	0.00391527	0.00315776	0	0	0	0.00405877	0	0.004998	0	0	0	0.0174734	0	0	0	0	0	0	0	0	0	0.00385193	0	0.0122692	0.00413496	0	0	0.00622084	0.00476826	0.00409702	0	0	0.00610109	0.00344531	0	0	0	0	0	0.0048992
Arsenophonus	0	0	0	0	0	0	0	0	0	0	0	0	0	0	0	0	0	0	0	0	0	0	0	0	0	0	0.00309885	0	0	0	0	0	0	0	0	0	0	0	0	0	0	0	0	0	0	0	0	0	0
Arthrobacter	0.0134332	0	0.0436987	0.0396432	0.00507434	0.0111944	0.0153337	0.0156281	0.0420221	0.0274069	0.0157888	0.00527065	0	0.00283817	0.0243526	0.00858922	0.029988	0.014562	0.0234145	0.0167631	0.0291223	0.00495135	0.025172	0.00940262	0	0.0494288	0.0123954	0.00306204	0.0347625	0.0233294	0.00385193	0.0079526	0.0245384	0.00826993	0	0.00940601	0.00622084	0.0190731	0.0368732	0.00934056	0.00647522	0.033556	0.0275624	0.0103125	0.0105407	0	0.00734646	0.0206897	0.0342944
Arthrospira	0	0	0	0	0	0	0	0	0	0	0	0	0	0	0.00405877	0.00429461	0	0	0	0	0	0.00247568	0	0	0	0	0	0	0	0	0	0.0039763	0.00613459	0	0	0	0	0	0	0	0	0	0.00344531	0.00343749	0.00527037	0	0	0	0
Asaia	0	0	0	0	0	0	0	0	0	0	0	0	0	0.00283817	0	0	0	0	0	0	0	0	0	0	0	0	0	0	0	0.0051843	0	0	0	0.00413496	0	0	0	0	0.00409702	0	0	0	0	0	0	0	0	0.00344828	0
Ascovirus	0	0	0	0	0	0	0	0	0	0	0	0	0	0	0	0	0	0	0	0	0	0	0	0	0	0	0	0	0	0	0	0	0	0	0	0	0	0	0	0	0	0	0	0	0	0	0	0	0
Asticcacaulis	0	0	0	0.0033036	0.00507434	0	0	0	0	0	0.00315776	0	0	0.00283817	0	0	0	0	0	0	0	0	0.00839067	0	0	0	0.00309885	0	0	0.00259215	0	0	0	0	0	0	0	0	0	0	0	0	0.00344531	0	0	0	0	0	0.0024496
Atopobium	0.00671659	0	0.00436986	0.016518	0	0.00559722	0.00613346	0.00390701	0.0126066	0.00783055	0	0	0	0.00283817	0.00811754	0.00429461	0.004998	0.00582479	0.00334493	0.00419076	0.273749	0.0173297	0.012586	0.00940262	0	0.0164763	0.00929656	0	0.0144844	0.0051843	0.0115558	0.0039763	0.0122692	0	0	0.004703	0.00622084	0.00476826	0.0450672	0.00233514	0.00647522	0.00915164	0.0103359	0.00687498	0.00527037	0.111268	0.0110197	0	0.0097984
Aurantimicrobium	0	0	0	0	0	0	0	0	0	0	0	0	0	0	0	0	0	0	0	0	0	0.00247568	0	0	0	0	0	0	0	0	0	0	0	0	0	0	0	0	0	0	0	0	0	0	0	0	0	0	0.0024496
Auraticoccus	0	0	0	0	0	0	0	0	0	0	0.00315776	0	0	0	0	0	0.004998	0	0.00334493	0	0	0	0	0.00313421	0	0	0	0	0	0	0	0	0	0	0	0	0	0	0.00409702	0	0	0	0	0	0	0	0	0	0
Aureimonas	0	0	0.00436986	0	0	0	0	0.00390701	0	0	0	0	0	0	0	0	0	0	0	0	0	0	0	0	0	0	0	0	0	0	0	0	0	0	0	0	0	0	0	0	0	0	0	0	0	0	0	0	0
Auricoccucs	0.0033583	0.00432732	0.00436986	0	0	0	0	0	0	0	0	0	0.00434461	0	0	0	0	0	0	0	0	0	0	0	0	0	0	0	0	0	0	0	0	0	0	0	0	0	0	0	0	0	0	0	0	0	0	0	0
Aviadenovirus	0	0	0	0	0	0	0	0	0	0	0	0	0	0	0	0	0	0	0	0	0	0	0	0	0	0	0	0	0	0	0	0	0	0	0	0	0	0	0	0	0	0	0	0	0	0	0	0	0
Azoarcus	0.0167915	0	0.00436986	0.0099108	0.00507434	0.00279861	0.00306673	0.011721	0.00840442	0.00391527	0.00315776	0.0105413	0.00868923	0	0	0	0	0.00873718	0.00668986	0	0.00582445	0.00247568	0.00419533	0.00940262	0	0.0164763	0	0.00306204	0.00869061	0.00259215	0.00770386	0.0079526	0.00613459	0	0	0.00940601	0	0.00476826	0.0122911	0.00700542	0	0	0	0	0.00527037	0	0	0	0.0097984
Azorhizobium	0.0033583	0	0	0.0066072	0	0	0	0.00390701	0.00420221	0.00783055	0.00315776	0	0	0	0.00405877	0.00429461	0	0.00291239	0	0	0	0	0.012586	0	0.00378043	0.00549209	0.00309885	0	0	0.00259215	0.00385193	0.0039763	0	0	0	0	0	0	0	0.00467028	0	0.00610109	0	0	0	0	0.00367323	0.00344828	0.0024496
Azospira	0	0	0	0.0033036	0	0	0.00613346	0.00781403	0	0.00391527	0.00315776	0	0	0	0.00811754	0.00429461	0	0	0.0100348	0	0	0.00247568	0.00839067	0.00626841	0	0.00549209	0.00309885	0.00306204	0.00289687	0.0051843	0	0.0039763	0.00613459	0.00413496	0	0.004703	0	0.00476826	0.00819404	0.00233514	0.00647522	0.00305055	0	0.00343749	0	0.0101153	0	0.00344828	0
Azospirillum	0.00671659	0	0.0305891	0.0132144	0	0.0111944	0.00613346	0.00781403	0.0126066	0.0156611	0	0.0158119	0	0.00567634	0.0243526	0.0128838	0.02499	0.0203868	0.0133797	0.0167631	0.0174734	0.00742703	0.012586	0.0282079	0.00756086	0.0274605	0.00309885	0	0.0202781	0.00777645	0.00385193	0.0119289	0	0.00413496	0	0.00940601	0.0248834	0.00953653	0.0245821	0.0233514	0.0129504	0.0244044	0.0103359	0.00687498	0	0	0.00734646	0.0241379	0.024496
Azotobacter	0.0033583	0	0.00873973	0.0033036	0	0	0.00306673	0.00390701	0.00420221	0	0	0	0.00868923	0	0	0	0	0	0.00668986	0	0	0	0.012586	0.00313421	0.00378043	0.00549209	0	0	0.00289687	0.00259215	0.00770386	0.0039763	0	0	0	0	0	0.00476826	0.00409702	0.00467028	0.00323761	0.00915164	0.00689061	0	0	0	0.00734646	0.0103448	0.0024496
Babuvirus	0	0	0	0	0	0	0	0	0	0	0	0	0	0	0	0	0	0	0	0	0	0	0	0	0	0	0	0	0	0	0	0	0	0	0	0	0	0	0	0	0	0	0	0	0	0	0	0	0
Bacillus	0.107465	0.0519278	0.096137	0.112322	0.0405947	0.0895556	0.0858685	0.113303	0.142875	0.43068	0.12631	0.0790597	0.0608246	0.0425725	0.089293	0.11166	0.169932	0.0582479	4.4521	0.0670522	0.10484	0.0321838	9.9849	8.07372	0.0718282	0.197715	0.117756	0.0551167	7.40151	0.0829488	0.13867	0.111336	0.0490767	0.128184	0.40674	0.117575	0.0684292	0.157353	0.0983284	1.99421	0.103603	0.067112	0.0930233	0.0824997	0.126489	0.161845	0.0697914	0.0689655	0.102883
Bacterioplanes	0	0	0	0	0	0.00279861	0	0	0	0	0	0	0	0	0	0	0	0.00291239	0	0	0	0	0.00419533	0.00313421	0	0	0.00309885	0.00306204	0.00289687	0	0	0.0039763	0	0	0	0	0	0	0	0	0	0	0	0	0	0	0	0	0
Bacteroides	23.9312	28.4608	23.5448	23.3333	15.8472	23.304	32.9766	28.9588	17.9897	24.5292	40.7509	4.05313	26.815	19.0555	27.4495	30.1954	11.2155	21.4352	27.3047	12.2286	24.253	29.5918	29.3925	14.1917	4.83517	31.261	20.1518	26.159	14.2005	31.5076	20.2226	29.2139	3.93227	8.91912	0	9.3872	11.577	13.5943	42.5147	32.8858	34.937	21.0457	41.5469	0.0687498	28.518	0.0101153	18.7482	42.2759	34.9435
Barnesiella	0.100749	0.0519278	0.65985	0.191609	0.0507434	0.369417	0.0705348	0.0859543	0.369795	0.250578	0.0631552	0.0158119	0.125994	0.0312198	0.588522	0.0901868	0.034986	0.262116	0.0635537	0.0251446	0.0465956	0.0544649	0.176204	0.206858	0.026463	0.225176	0.0898667	0.0520546	0.228853	0.381046	0.0500751	0.143147	0.0552113	0.0372147	0	0.0517331	0.0186625	0.0238413	0.135202	0.102746	0.181306	0.122022	0.158484	0.00343749	0.447981	0	0.0257126	0.158621	0.110232
Bartonella	0.0033583	0	0.00436986	0.0033036	0	0	0	0	0.0126066	0	0.00315776	0.00527065	0.00434461	0.00283817	0	0.00858922	0.009996	0.00291239	0.00334493	0.00838153	0	0.00247568	0	0.00940262	0.00378043	0	0.00309885	0	0.0144844	0	0.00770386	0	0	0	0.0290529	0.004703	0.00622084	0.00953653	0.00409702	0	0.00323761	0.00305055	0	0	0	0	0.00367323	0	0.0048992
Basfia	0	0	0	0	0	0.00279861	0	0	0	0	0	0	0	0	0	0	0.004998	0	0	0	0	0	0	0	0	0	0	0.00306204	0	0	0.00770386	0	0	0.00413496	0	0	0	0	0	0.00233514	0	0	0	0	0	0	0.00367323	0	0.0024496
Basilea	0	0	0.00436986	0	0	0	0	0	0	0	0	0	0	0	0	0	0	0	0	0	0	0	0	0	0	0	0	0	0	0	0	0	0	0	0	0	0	0	0	0	0	0	0.00344531	0	0	0	0	0	0
Bc431virus	0	0	0	0	0	0	0	0	0	0	0	0	0	0	0	0.00429461	0	0	0	0	0	0	0	0	0	0	0	0	0	0	0	0	0	0	0	0	0	0	0	0	0	0	0	0	0	0	0	0	0
Bdellovibrio	0.0100749	0	0	0.0033036	0.00507434	0.00559722	0	0	0.00420221	0	0.00315776	0	0.00434461	0	0.00405877	0	0	0	0	0	0.0116489	0	0.00419533	0.00940262	0.00378043	0.00549209	0	0	0.00579374	0.0051843	0	0.0039763	0.00613459	0	0	0	0.00622084	0	0	0.00233514	0.00323761	0	0	0.00343749	0	0	0	0.00689655	0
Beggiatoa	0	0	0	0	0.00507434	0	0	0	0	0.00391527	0	0	0	0	0	0	0	0	0	0	0	0	0	0	0	0	0	0	0	0	0	0	0	0	0	0	0	0	0	0	0	0	0	0	0	0	0	0	0
Begomovirus	0	0	0	0	0	0	0	0	0	0	0	0	0	0	0	0	0	0	0	0	0	0	0	0	0	0	0	0	0	0	0	0	0	0	0	0	0	0	0	0	0	0	0	0	0	0	0	0	0
Beijerinckia	0	0	0.00436986	0	0	0	0	0	0	0	0	0	0	0	0	0	0	0	0	0	0	0	0	0	0	0	0	0	0	0	0	0	0	0	0	0	0	0	0	0	0	0	0	0.00343749	0	0	0.00367323	0	0.0024496
Belliella	0	0	0	0	0	0	0	0	0	0	0	0	0	0	0.00405877	0	0	0	0	0.00419076	0	0	0	0	0	0	0	0	0	0.00259215	0	0	0	0.00413496	0.0290529	0	0	0	0	0	0	0	0	0	0	0	0	0.00344828	0
Bernardetia	0	0	0	0	0	0	0	0	0	0	0	0	0	0	0	0	0	0	0	0	0	0.00247568	0	0.00626841	0	0	0	0	0	0	0.00385193	0	0	0	0	0	0	0.00476826	0	0	0	0	0	0	0	0	0	0	0
Betabaculovirus	0	0	0	0	0	0	0	0	0	0	0	0	0	0	0	0	0	0	0	0	0	0	0	0	0	0	0	0	0	0	0	0	0	0	0.0290529	0	0	0	0	0	0	0	0	0	0	0	0	0	0
Betapartitivirus	0	0	0	0	0	0	0	0	0	0	0	0	0	0	0	0	0	0	0	0	0	0	0	0	0	0	0	0	0	0	0	0	0	0	0	0	0	0	0	0	0	0	0	0	0	0	0	0	0
Beutenbergia	0.0033583	0	0	0.0132144	0.00507434	0	0.00306673	0.00390701	0.00840442	0.00783055	0	0	0.00434461	0.0085145	0.00405877	0.00429461	0.009996	0.00291239	0.00334493	0.00419076	0	0	0.00419533	0.00626841	0	0.00549209	0.00619771	0.00306204	0	0.00259215	0	0	0.00613459	0	0.0290529	0.00940601	0	0	0.0163881	0.00233514	0	0.00305055	0	0	0.00527037	0	0.00734646	0.00344828	0.0024496
Bibersteinia	0.0033583	0.00432732	0	0.0066072	0	0	0	0	0	0	0	0	0	0.00283817	0	0	0	0	0	0	0	0	0	0	0	0	0.00619771	0	0	0.00259215	0	0	0	0	0	0	0	0	0.00409702	0	0.00647522	0	0	0	0	0	0	0	0.0024496
Bifidobacterium	5.57477	5.99334	8.19787	1.15626	0.756077	3.06728	9.65407	0.234421	0.268941	12.8578	6.95339	2.02393	0.0825477	6.82296	9.73699	6.10694	3.22871	2.45515	5.39872	6.87704	3.41895	8.19201	0.490854	12.0103	12.6493	8.13928	1.13418	8.32568	1.21089	3.06911	5.18085	1.42749	9.5761	2.62157	0	11.9927	9.49922	5.55979	6.63717	4.36671	12.2123	4.55752	0.50646	9.01653	5.80795	1.09245	11.1189	0.337931	0.815717
Blastochloris	0	0	0	0	0	0	0	0	0	0	0	0.00527065	0	0.00283817	0	0	0	0	0.00334493	0	0	0.00247568	0	0.00626841	0	0.00549209	0	0.00306204	0	0.00259215	0	0	0	0.00413496	0	0	0	0	0.00409702	0.00467028	0	0	0	0.00343749	0.00527037	0	0	0	0
Blastococcus	0	0	0	0.0033036	0	0	0	0	0	0	0	0	0	0.00283817	0	0	0	0.00291239	0	0	0	0	0	0	0	0	0	0	0	0	0	0	0	0	0	0	0	0	0	0	0	0	0	0	0	0	0	0	0
Blastomonas	0	0	0.00436986	0	0	0	0	0.00390701	0.00840442	0	0.00315776	0.00527065	0	0	0	0	0	0	0	0	0.00582445	0.00247568	0	0.00626841	0	0.00549209	0	0	0	0	0	0.0039763	0	0	0	0	0	0.00953653	0.00409702	0.00467028	0.00323761	0.00305055	0.00344531	0	0	0	0.00367323	0	0.0024496
Blattabacterium	0	0.00432732	0	0	0	0	0	0	0	0	0	0	0	0	0	0.00429461	0.004998	0	0	0	0	0	0	0	0	0	0	0	0	0	0	0	0	0	0	0	0	0	0	0	0	0	0	0	0	0	0	0	0.0024496
Blautia	0.943681	6.87611	0.96137	0.753221	0.801746	0.915146	1.6131	1.62141	1.1472	0.818292	1.6673	0.632478	1.42938	0.525061	0.917282	1.03071	1.38944	0.7048	0.849612	1.66373	1.23478	0.418389	0.834872	0.648781	0.820354	1.34556	0.979238	0.774695	1.15875	0.712842	0.8975	1.82512	0.76069	1.09577	0	1.39679	0.777605	1.7881	0.946411	0.803288	0.747887	0.927366	0.589147	0.639373	0.621904	0.637265	1.20482	0.848276	0.960243
Bordetella	0.0302247	0.00432732	0.0568082	0.0198216	0.00507434	0.0195903	0.0153337	0.0546982	0.0504265	0.0156611	0.012631	0.0158119	0	0.017029	0.00405877	0.0386515	0.009996	0.0465983	0.0501739	0.0293353	0.0407712	0.0198054	0.0461487	0.0501473	0.0151217	0.0439367	0.0185931	0.00918611	0.0173812	0.0155529	0.0115558	0.0357867	0.0122692	0.0124049	0	0.0470301	0.0186625	0.0429144	0.0450672	0.0280217	0.0129504	0.0274549	0.0206718	0.0309374	0.0210815	0	0.0293858	0.0206897	0.0195968
Borrelia	0	0	0	0	0	0	0	0	0	0	0	0	0	0	0.00405877	0	0	0	0	0	0	0	0	0	0	0	0.00309885	0.00306204	0	0	0.00385193	0	0	0	0.0290529	0	0	0	0	0.00233514	0	0	0	0	0	0	0	0.00344828	0
Borreliella	0	0	0	0.0033036	0.00507434	0	0	0	0.00420221	0	0	0	0	0	0	0	0	0	0	0	0	0	0	0	0	0	0	0	0.00289687	0	0.00385193	0	0.00613459	0	0.0290529	0	0	0	0	0	0	0	0	0	0	0	0	0	0
Bosea	0.0033583	0	0.0174795	0	0.00507434	0.00279861	0	0.00781403	0	0.00391527	0	0	0	0	0.00405877	0.0128838	0	0.00291239	0	0	0	0	0	0.00313421	0	0	0	0	0.00289687	0.00259215	0	0.0039763	0	0	0	0.004703	0	0.00476826	0.0122911	0	0.00323761	0.00610109	0	0	0	0	0.00367323	0	0.0048992
Brachybacterium	0	0	0.0218493	0.0132144	0	0.00279861	0.00613346	0	0.0252133	0.0195764	0.00631552	0.00527065	0	0	0.0121763	0.00429461	0.014994	0	0.00334493	0.0125723	0.0116489	0.00247568	0.00419533	0.00940262	0	0.00549209	0.0123954	0.00306204	0.00869061	0.0051843	0.00770386	0	0.00613459	0.00413496	0	0	0	0.00476826	0.0163881	0.00934056	0	0.0183033	0.00689061	0.0103125	0.00527037	0.0202306	0.00367323	0.0103448	0.0146976
Brachyspira	0.0033583	0	0.00436986	0	0.00507434	0.00559722	0.00613346	0	0.0126066	0.00391527	0.00315776	0.00527065	0	0	0	0.00858922	0.019992	0.0116496	0.00334493	0.0125723	0.0116489	0.00247568	0	0.00626841	0.00378043	0.0109842	0	0.00306204	0.00579374	0.0129608	0	0.0039763	0	0.0165399	0	0.00940601	0	0.00953653	0.00409702	0.00700542	0	0.00610109	0.00689061	0.00687498	0.00527037	0.0101153	0.00367323	0	0.0024496
Bradyrhizobium	0.0100749	0	0.0218493	0.0132144	0.00507434	0.0139931	0.00306673	0.00781403	0.0252133	0.0117458	0.012631	0.00527065	0.00868923	0.00283817	0.0243526	0.0171784	0.009996	0.00873718	0.0133797	0.0167631	0	0.00495135	0.0167813	0.00626841	0.0113413	0.0164763	0.0154943	0.00612407	0.023175	0	0.00770386	0.0159052	0	0.00826993	0.0290529	0.004703	0.0186625	0.0143048	0.0409702	0.0186811	0.00647522	0.0183033	0.0275624	0.0103125	0.0105407	0.0101153	0.0183661	0.0172414	0.0342944
Brenneria	0	0	0	0	0	0.00279861	0.00306673	0.011721	0	0.0117458	0.00631552	0	0.00434461	0.00283817	0.00405877	0	0	0.00582479	0.00334493	0.00838153	0.00582445	0	0.00419533	0.00313421	0	0.00549209	0.00309885	0.00612407	0	0.00259215	0	0.0079526	0	0.00413496	0	0	0.0248834	0.00476826	0	0.00467028	0	0.00610109	0	0.00343749	0	0	0.00734646	0.00689655	0
Brevefilum	0	0	0	0.0066072	0	0	0.00306673	0	0	0.00391527	0	0	0	0	0.00405877	0	0.004998	0.00291239	0.00334493	0.00419076	0	0.00247568	0	0.00313421	0	0	0.00309885	0	0.00289687	0	0	0	0	0	0	0	0	0	0.00409702	0	0	0.00610109	0	0.00343749	0	0	0.00367323	0.00689655	0.0073488
Brevibacillus	0.0033583	0	0.0131096	0.0066072	0.00507434	0	0	0.0156281	0.0168088	0.00391527	0.00315776	0.00527065	0	0.0113527	0.00405877	0.00429461	0.039984	0.00291239	0.0167246	0.00838153	0.0116489	0	0.0209767	0.00940262	0.00756086	0.0109842	0.00929656	0.0153102	0.0173812	0.0051843	0.00770386	0.0039763	0	0.00413496	0	0	0.00622084	0.00953653	0.0204851	0.00467028	0.00323761	0.00610109	0.00344531	0.00343749	0.00527037	0	0	0.00344828	0.012248
Brevibacterium	0.00671659	0	0.0131096	0.0099108	0.0101487	0.00279861	0.00306673	0.00390701	0.00840442	0.0156611	0	0	0	0.00567634	0.00405877	0	0.009996	0.00582479	0.0133797	0.00838153	0.0174734	0	0.00419533	0.00313421	0	0.0164763	0	0.00612407	0.00579374	0.00259215	0	0.0039763	0.0122692	0	0	0.004703	0.00622084	0.00476826	0.00409702	0	0.00323761	0.00610109	0.0103359	0.00343749	0	0	0.00367323	0.0103448	0.0073488
Brevundimonas	0.0033583	0	0.0174795	0.0066072	0.0101487	0.00839584	0.00613346	0	0.00840442	0	0.0189466	0.00527065	0.00434461	0.00567634	0.0121763	0	0.004998	0.0116496	0.0133797	0.00419076	0	0.00495135	0.00839067	0.00940262	0	0	0.00929656	0.00306204	0.0144844	0.0103686	0	0.0159052	0	0.00413496	0	0.004703	0.0124417	0	0.0122911	0.00233514	0.00647522	0.0152527	0.0103359	0.00687498	0.00527037	0	0.0110197	0.0172414	0.0048992
Brochothrix	0.0033583	0	0.00436986	0.0066072	0	0	0.00306673	0.00390701	0.00840442	0.00391527	0	0	0	0	0.00405877	0	0	0	0	0	0.00582445	0	0.00419533	0	0	0.00549209	0	0.0122481	0.00289687	0	0.00385193	0	0	0.00413496	0	0	0	0	0.00409702	0	0.00323761	0.00305055	0	0.00687498	0	0	0.00367323	0	0.0024496
Brucella	0.0033583	0	0.0131096	0	0	0.00559722	0	0.00390701	0.0168088	0.00783055	0.00631552	0.00527065	0.00434461	0	0.00405877	0.00429461	0	0.00291239	0.00334493	0.00419076	0.00582445	0	0	0	0	0	0	0.00306204	0.00289687	0.0051843	0	0.0039763	0	0	0	0.004703	0	0	0.00409702	0.00467028	0.00323761	0.00305055	0	0	0	0	0.0110197	0.00689655	0.0048992
Buchnera	0	0	0.00436986	0	0	0	0	0	0	0.00391527	0.00315776	0	0	0	0	0	0	0.00291239	0	0	0	0.00247568	0.00419533	0.00313421	0	0	0	0.00306204	0	0.00259215	0	0.0039763	0	0.00413496	0	0.004703	0	0.00476826	0	0.00233514	0	0	0	0	0	0	0.00367323	0	0.0024496
Burkholderia	0.0537327	0.012982	0.0524384	0.0231252	0.0101487	0.0391806	0.0582679	0.0742332	0.0882464	0.0508986	0.0631552	0.0158119	0.00434461	0.0141908	0.052764	0.0730084	0.034986	0.0378611	0.0635537	0.0502892	0.0873668	0.0222811	0.0839067	0.0532815	0.00756086	0.137302	0.0309885	0.0336824	0.066628	0.0233294	0.0308155	0.0596445	0.0184038	0.0248098	0.0290529	0.0658421	0.0497667	0.0572191	0.135202	0.0443676	0.0712274	0.0854153	0.0378984	0.0103125	0.0316222	0	0.0293858	0.0413793	0.048992
Butyrivibrio	0.120899	0.0432732	0.0699178	0.049554	0.0913381	0.0783611	0.0828018	0.125024	0.201706	0.101797	0.0315776	0.0790597	0.0260677	0.0283817	0.129881	0.141722	0.269892	0.119408	0.107038	0.0838153	0.10484	0.0495135	0.209767	0.150442	0.105852	0.214192	0.114658	0.107171	0.170915	0.137384	0.0924464	0.0994075	0.0122692	0.128184	0	0.0940601	0.0311042	0.214572	0.0860374	0.107416	0.0679898	0.186083	0.0516796	0.116875	0.0685148	0.0404613	0.0367323	0.0931034	0.198418
Bxz1virus	0	0	0	0	0	0	0	0	0	0	0	0	0	0	0	0	0	0	0	0	0	0	0	0	0	0	0	0	0	0	0	0	0	0	0	0	0	0	0	0	0	0	0	0	0	0	0	0	0
C2virus	0	0	0	0	0	0	0	0	0	0	0	0	0	0	0	0	0	0	0	0	0	0	0	0	0	0	0	0	0	0	0	0	0	0	0	0	0	0	0	0	0	0	0	0	0	0	0	0	0
C5virus	0	0	0	0	0	0	0	0	0	0	0	0	0	0	0	0	0	0	0	0	0	0	0	0.00313421	0	0	0	0	0	0.00259215	0	0	0	0	0	0	0	0	0	0	0	0	0	0	0	0	0	0.00344828	0
Caldanaerobacter	0	0	0	0	0	0.00279861	0	0.00781403	0.00420221	0.00783055	0.00315776	0	0.00868923	0.00283817	0.00405877	0.00429461	0	0	0.00334493	0	0.00582445	0	0	0	0.00378043	0	0.00619771	0	0.00579374	0.00259215	0	0.0039763	0	0.00413496	0	0	0.00622084	0.00476826	0	0.00233514	0	0	0	0	0	0	0	0	0.0024496
Caldicellulosiruptor	0.0100749	0	0.00436986	0	0	0.00839584	0.00613346	0.00390701	0.00840442	0.00391527	0.00315776	0.00527065	0	0.00283817	0.00405877	0	0.014994	0.0116496	0	0.0125723	0.00582445	0.00495135	0.00839067	0.00626841	0.00378043	0.0109842	0.0123954	0.00306204	0.00289687	0.0129608	0.0115558	0	0	0.00413496	0	0	0.0124417	0.0190731	0	0.00467028	0.00971282	0	0.00689061	0.0103125	0.00527037	0	0.00367323	0.00344828	0.0048992
Caldilinea	0	0	0	0	0	0	0.00306673	0	0.00420221	0	0.00947328	0	0	0	0.00405877	0	0	0.00291239	0	0	0	0.00247568	0	0	0	0	0	0	0	0	0	0	0	0	0	0	0	0	0	0	0	0.00305055	0	0	0	0	0.00367323	0	0.0024496
Caldimicrobium	0	0	0	0	0	0	0	0	0	0	0.00315776	0	0	0.00283817	0	0	0	0	0	0	0	0	0	0	0	0	0	0	0	0	0	0	0	0	0	0	0	0.00476826	0	0	0	0	0	0	0	0	0	0	0
Caldisericum	0.0033583	0	0.00436986	0	0.00507434	0	0	0	0	0	0	0.00527065	0	0	0	0	0	0	0.00334493	0	0	0	0	0	0	0.00549209	0	0	0	0	0	0	0.00613459	0	0	0	0	0	0.00409702	0	0	0	0	0	0	0	0	0	0
Calditerrivibrio	0	0	0	0	0	0	0	0	0	0	0	0	0	0	0	0	0	0	0	0.00419076	0	0	0	0	0	0	0	0	0.00289687	0	0	0	0	0	0	0	0	0	0	0	0	0	0	0.00343749	0	0	0	0	0
Caldithrix	0	0	0	0.0033036	0	0	0	0.00390701	0	0	0	0	0	0	0.00405877	0	0	0	0.00334493	0	0	0	0	0	0	0	0	0	0	0	0	0	0	0	0	0	0	0	0	0	0	0.00610109	0	0	0	0.0101153	0	0	0
Calothrix	0	0	0.0131096	0	0	0	0.00306673	0	0	0	0	0	0	0	0.00405877	0.00429461	0.009996	0.00291239	0	0	0	0	0	0	0	0	0	0	0	0	0	0	0.00613459	0	0	0	0.00622084	0	0	0.00233514	0	0	0	0	0.00527037	0	0	0	0
Campylobacter	0.0537327	0.012982	0.0742877	0.0462504	0.030446	0.0475764	0.0337341	0.0390701	0.0756398	0.0313222	0.0599975	0.0632478	0.0521354	0.0425725	0.0771166	0.0901868	0.07497	0.0582479	0.0735884	0.0586707	0.0465956	0.0198054	0.0419533	0.0407447	0.0415848	1.2522	0.0557794	0.0489926	0.0840093	0.0440666	0.0346674	0.0477156	0.030673	0.0578895	0	0.0893571	0.0746501	0.0810605	0.0573582	0.0513731	0.0323761	0.0427077	0.0378984	0.0446874	0.0527037	0.343921	0.0330591	0.0655172	0.048992
Candidatus Accumulibacter	0	0	0	0.0033036	0	0	0	0.00390701	0	0.00391527	0	0	0	0	0	0	0	0	0	0	0.00582445	0.00247568	0	0.00313421	0	0	0	0	0	0	0	0	0	0	0	0	0	0	0.00409702	0.00467028	0	0	0	0.00343749	0	0	0	0	0.0097984
Candidatus Amoebophilus	0	0	0	0	0	0	0	0	0	0	0	0	0	0	0	0	0	0	0	0	0	0	0	0	0	0	0	0	0	0	0	0	0	0	0	0	0	0	0	0	0	0	0	0	0	0	0	0	0
Candidatus Aquiluna	0.0033583	0	0.00436986	0.0066072	0	0	0	0.00390701	0.00420221	0.00391527	0	0	0	0	0.00405877	0	0.004998	0.00291239	0.00334493	0	0	0	0.00419533	0.00313421	0	0.00549209	0	0	0	0	0	0.0039763	0	0	0	0.004703	0	0	0	0	0	0	0.00344531	0	0	0	0	0	0.0024496
Candidatus Arthromitus	0	0	0	0	0	0.00559722	0.00306673	0.00781403	0	0	0	0.0105413	0	0.00283817	0	0	0.004998	0	0	0.00419076	0.00582445	0	0.00419533	0.00313421	0.00378043	0	0.00619771	0.00612407	0	0.0051843	0.00385193	0.0039763	0	0.00826993	0	0.00940601	0.00622084	0.00476826	0.0163881	0.00467028	0	0	0.00344531	0	0.00527037	0	0.00367323	0.00344828	0.0024496
Candidatus Atelocyanobacterium	0	0	0	0	0	0	0	0	0	0	0	0	0	0	0	0	0.004998	0	0	0	0	0	0	0	0.00378043	0	0	0	0	0.00259215	0	0.0039763	0	0	0	0	0	0	0	0	0	0	0	0	0	0	0	0	0
Candidatus Azobacteroides	0	0.00865464	0	0.0033036	0.00507434	0.00279861	0	0.00390701	0.00420221	0.00783055	0.00947328	0.00527065	0.00868923	0.00283817	0.00405877	0.00858922	0	0	0.00334493	0	0	0.00247568	0.00419533	0	0	0.00549209	0.00619771	0.00306204	0	0.00259215	0.00385193	0	0	0.00413496	0	0	0	0	0	0.00467028	0	0	0	0	0	0	0	0.00344828	0
Candidatus Babela	0	0	0	0	0	0	0	0	0	0	0	0	0	0	0	0	0	0	0	0	0	0	0	0	0	0	0	0	0	0	0	0	0	0	0	0	0	0	0	0	0	0	0	0	0	0	0	0	0
Candidatus Blochmannia	0	0	0	0	0	0.00279861	0	0	0.00420221	0	0.00315776	0	0	0	0.00405877	0	0	0.00291239	0.00334493	0.00419076	0	0	0.00419533	0.00313421	0.00378043	0	0	0	0	0	0	0	0	0	0	0	0	0	0	0.00233514	0	0.00305055	0	0	0	0	0	0	0
Candidatus Cardinium	0	0	0	0	0	0	0	0	0	0	0	0	0	0	0.00405877	0	0	0	0	0	0	0	0	0	0	0	0	0	0	0	0	0	0	0	0.0290529	0	0	0	0	0	0	0	0	0	0	0	0	0	0
Candidatus Cloacimonas	0	0	0.00436986	0	0	0	0	0	0	0	0	0	0	0	0.00405877	0	0	0.00291239	0	0	0	0	0	0	0	0	0	0	0	0.00259215	0	0	0	0	0	0	0	0	0	0	0	0	0	0	0.00527037	0	0	0	0
Candidatus Desulfofervidus	0	0	0	0	0	0	0	0	0	0	0	0	0	0	0	0	0	0	0	0	0	0	0	0	0	0	0	0	0	0	0	0	0	0	0	0	0	0	0	0	0	0	0	0	0	0	0	0	0
Candidatus Desulforudis	0.0033583	0	0.00873973	0	0	0	0	0.011721	0.00420221	0	0.00315776	0.00527065	0	0	0	0	0	0	0	0.00838153	0	0	0.00419533	0	0	0.00549209	0.00619771	0	0.00289687	0.0051843	0	0.0039763	0	0.00413496	0	0.00940601	0	0.00953653	0.00409702	0	0	0	0	0.00687498	0.00527037	0	0.00367323	0	0.0024496
Candidatus Doolittlea	0	0	0	0	0	0	0	0	0	0	0	0	0	0	0.00405877	0	0	0	0	0	0	0	0	0	0	0	0	0	0	0	0	0	0	0	0	0	0	0	0	0	0	0	0	0	0	0	0	0	0
Candidatus Endolissoclinum	0	0	0	0	0	0	0	0	0	0	0	0	0	0	0	0	0	0	0	0	0	0	0	0	0	0	0	0	0	0	0	0	0	0	0	0	0	0	0	0	0	0	0	0	0	0	0	0	0
Candidatus Evansia	0	0	0	0	0	0	0	0	0	0	0	0	0	0	0	0	0	0	0	0	0	0	0	0	0	0.00549209	0	0	0	0	0	0	0	0	0	0	0	0	0	0	0	0	0	0	0	0	0	0	0
Candidatus Gullanella	0	0	0	0	0	0	0	0	0	0	0	0	0	0	0	0	0	0	0	0	0	0	0	0	0	0	0	0	0	0	0	0	0	0	0	0	0	0	0	0	0	0	0	0	0	0	0	0	0
Candidatus Hamiltonella	0	0	0	0	0	0	0	0	0	0	0	0	0	0	0	0	0	0	0	0	0	0	0	0	0	0	0	0	0	0	0	0	0	0	0.0290529	0	0	0	0	0	0	0	0	0	0	0	0	0	0
Candidatus Hoaglandella	0	0	0	0	0	0	0	0	0	0	0	0	0	0	0	0	0	0	0	0	0	0	0	0	0	0	0	0	0	0	0	0	0	0	0	0	0	0	0	0	0	0	0	0	0	0	0	0	0
Candidatus Ishikawaella	0	0	0	0	0	0	0	0	0	0	0	0	0	0.00283817	0	0	0	0	0	0.00419076	0	0	0	0	0	0	0	0	0.00289687	0	0	0	0	0	0	0	0	0	0	0	0	0	0	0	0	0	0	0	0
Candidatus Izimaplasma	0	0	0	0	0	0	0	0	0	0	0.00315776	0	0	0	0	0	0	0.00291239	0	0	0	0	0	0	0	0	0.00309885	0	0.00289687	0	0	0	0	0	0	0	0	0	0	0	0	0	0	0	0	0	0	0	0
Candidatus Koribacter	0.0033583	0	0	0.0033036	0	0	0.00306673	0.00390701	0	0.00391527	0	0	0	0	0.0121763	0	0	0	0	0	0	0	0	0	0	0.00549209	0.00309885	0	0.00579374	0	0	0.0079526	0	0	0	0	0	0	0.00409702	0.00233514	0	0	0.00344531	0	0	0	0	0.00689655	0.0024496
Candidatus Methanomethylophilus	0	0	0.00436986	0	0	0	0	0	0	0	0	0	0	0	0	0	0	0	0	0	0	0	0	0	0	0	0	0	0	0	0	0	0	0	0	0	0	0	0	0	0	0	0	0	0	0	0	0.00344828	0.0024496
Candidatus Methanoplasma	0	0	0	0	0	0	0	0	0	0	0	0	0	0	0	0	0	0	0	0	0	0	0	0	0	0	0	0	0	0	0	0	0	0	0	0	0	0	0	0	0	0	0	0	0	0	0	0	0
Candidatus Methylopumilus	0	0	0	0	0	0	0	0	0	0	0	0	0	0	0	0	0.009996	0.00291239	0	0	0	0	0	0	0	0	0	0	0	0	0	0.0039763	0	0	0	0	0	0	0	0	0	0	0	0	0	0	0	0	0
Candidatus Midichloria	0.0033583	0	0	0.0033036	0	0	0	0.00390701	0.00420221	0.00391527	0.00315776	0	0	0	0	0.00429461	0	0	0.00334493	0	0	0	0	0.00313421	0	0	0.00309885	0	0	0	0	0.0039763	0	0	0	0	0	0.00476826	0.00409702	0	0	0.00610109	0	0	0	0	0	0	0.0024496
Candidatus Mikella	0	0	0	0	0	0	0	0	0	0	0	0	0	0	0	0	0	0	0	0	0	0	0	0	0	0	0	0	0	0	0	0	0	0	0	0	0	0	0	0	0	0	0	0	0	0	0	0	0
Candidatus Moranella	0	0	0	0	0	0	0	0	0	0	0.00315776	0	0	0	0	0	0	0	0	0	0	0	0	0	0	0	0	0	0.00289687	0	0	0	0	0	0	0	0	0	0	0	0.00323761	0	0	0	0	0	0	0	0
Candidatus Nanopelagicus	0	0	0	0	0	0.00559722	0	0	0.00420221	0	0	0.00527065	0	0	0	0.00429461	0.004998	0	0	0.00419076	0	0	0	0	0	0	0	0	0	0.00259215	0	0	0	0	0	0	0	0	0	0	0	0	0	0	0	0.0101153	0.00367323	0	0
Candidatus Nitrosoglobus	0	0	0	0	0	0	0	0	0	0	0	0	0	0	0	0	0	0	0	0	0	0	0	0	0	0	0	0	0	0	0	0	0	0	0	0	0	0	0	0	0	0	0	0	0	0	0	0	0
Candidatus Nitrosomarinus	0	0	0	0	0	0	0	0	0	0	0	0	0	0	0	0	0	0	0	0	0	0	0	0	0.00378043	0	0	0	0	0	0	0	0	0	0	0	0	0	0	0	0	0	0	0	0	0	0	0	0
Candidatus Nitrosopelagicus	0	0	0	0	0	0	0	0	0	0	0	0	0	0	0	0	0	0	0	0	0	0	0	0	0	0	0	0	0	0	0	0	0.00613459	0	0	0	0	0	0	0	0	0	0	0	0	0	0	0	0
Candidatus Nitrosotenuis	0	0	0	0	0	0	0	0	0	0	0	0	0	0	0	0	0	0	0	0	0	0	0	0	0	0	0	0	0	0	0	0	0	0	0	0	0	0	0	0	0	0	0	0	0	0	0	0	0
Candidatus Nucleicultrix	0	0	0	0	0	0	0	0	0	0	0	0	0	0	0	0	0	0	0	0	0	0	0	0	0	0	0	0	0	0	0	0	0	0	0	0	0	0	0	0	0	0	0	0	0	0	0	0	0
Candidatus Paracaedibacter	0	0	0	0	0	0	0	0	0	0	0	0	0	0	0	0	0	0	0	0	0	0	0	0	0	0	0	0	0	0	0	0	0	0	0	0	0	0	0	0	0	0	0	0	0	0	0	0	0
Candidatus Pelagibacter	0	0	0.00436986	0	0	0	0.00306673	0	0	0	0	0.00527065	0	0	0	0	0.004998	0	0	0	0	0	0	0.00313421	0	0	0	0	0	0.00259215	0.00385193	0	0	0	0.0290529	0	0	0.00476826	0	0.00233514	0	0	0	0	0	0	0	0	0
Candidatus Phaeomarinobacter	0	0	0	0	0	0	0	0	0	0	0	0	0	0	0	0	0	0	0	0	0	0	0	0	0	0	0	0	0	0	0	0	0	0	0	0	0	0.00476826	0	0	0	0	0	0	0	0	0	0	0
Candidatus Phytoplasma	0.0033583	0	0	0.0066072	0	0	0	0	0	0	0	0	0	0	0	0	0	0	0	0	0	0	0	0	0	0	0	0	0	0	0	0	0	0	0	0	0	0	0	0	0	0	0	0	0	0	0	0	0
Candidatus Planktophila	0.0033583	0	0.00436986	0.0033036	0	0	0.00306673	0.00390701	0.00420221	0	0.00631552	0	0	0.00283817	0.00405877	0.00429461	0.009996	0	0.00334493	0.00419076	0.0116489	0	0.012586	0.0125368	0	0.00549209	0.00619771	0.00306204	0.00869061	0	0	0.0039763	0.00613459	0.00413496	0	0.00940601	0	0.00953653	0	0.00233514	0	0.00305055	0.0103359	0.00343749	0.0158111	0.0101153	0	0	0.0073488
Candidatus Portiera	0	0	0	0	0	0	0	0	0	0	0	0	0	0	0	0	0	0	0	0	0	0	0	0	0	0	0	0	0	0	0	0	0	0	0.0290529	0	0	0	0	0	0	0	0	0	0	0	0	0	0
Candidatus Profftella	0	0	0	0	0	0	0	0	0	0	0	0	0	0	0	0	0	0	0	0	0	0	0	0	0	0	0	0	0	0	0	0	0	0	0	0	0	0	0	0	0	0	0	0	0	0	0	0	0
Candidatus Promineofilum	0.0033583	0	0	0	0	0	0	0.011721	0	0.00783055	0.00315776	0	0	0	0	0	0.014994	0.00291239	0	0	0	0	0	0	0	0.00549209	0.00309885	0.00306204	0.00579374	0.00259215	0	0.0039763	0	0	0	0.004703	0.00622084	0	0	0	0.00323761	0.00305055	0.00344531	0.00343749	0	0	0	0.0103448	0.0024496
Candidatus Protochlamydia	0	0	0	0	0	0	0	0	0	0	0	0	0	0	0	0	0	0	0	0	0	0	0	0.00313421	0	0	0	0	0	0	0	0	0	0	0	0	0	0	0	0	0	0	0	0	0	0	0	0	0
Candidatus Puniceispirillum	0	0	0	0	0	0	0	0	0	0	0	0	0.00434461	0.00283817	0	0	0	0	0	0	0	0	0	0	0	0	0	0	0	0.00259215	0	0	0	0	0	0	0	0	0	0	0	0	0	0	0	0	0.00367323	0	0
Candidatus Ruthia	0	0	0	0	0	0	0	0	0	0	0	0	0	0	0	0	0	0	0	0	0	0.00247568	0	0	0	0	0	0.00306204	0	0	0	0	0	0	0	0	0	0	0	0.00233514	0	0.00305055	0	0	0	0	0	0	0.0024496
Candidatus Solibacter	0	0	0.00873973	0.0066072	0	0	0	0	0	0	0	0	0	0	0	0.00429461	0	0	0.00334493	0	0	0	0	0	0	0.00549209	0	0	0.00289687	0.00259215	0	0.0039763	0.00613459	0	0	0	0.00622084	0	0	0.00233514	0	0.00305055	0	0.00343749	0	0	0	0	0
Candidatus Sulcia	0	0	0	0	0	0	0	0	0	0	0	0	0	0	0	0	0	0.00291239	0	0	0	0	0	0	0	0	0	0	0	0	0	0	0	0	0	0	0	0	0	0	0	0	0	0	0	0	0	0	0
Candidatus Symbiobacter	0.0033583	0	0	0	0	0	0.00306673	0.00390701	0	0.00391527	0	0	0	0	0	0.00429461	0	0	0.00334493	0	0	0	0	0	0	0	0	0	0	0	0	0	0	0	0	0.004703	0	0	0	0	0	0.00610109	0	0.00343749	0	0	0	0	0
Candidatus Tachikawaea	0	0	0	0	0	0	0	0	0	0	0	0	0	0	0	0	0	0	0	0	0	0	0	0	0	0	0	0	0	0	0	0	0	0	0	0	0	0	0	0	0	0	0	0	0	0	0	0	0.0024496
Candidatus Thioglobus	0	0	0	0	0	0	0	0	0	0	0.00315776	0	0	0	0	0	0	0	0	0	0	0	0	0	0	0	0	0	0	0	0	0	0	0	0	0	0	0	0	0	0	0	0	0	0.00527037	0	0	0	0.0024496
Candidatus Walczuchella	0	0	0	0	0	0	0	0	0	0	0	0	0	0	0	0	0	0	0	0	0	0	0	0	0	0	0	0	0	0	0	0	0	0	0	0	0	0	0	0	0	0	0	0	0	0	0	0	0
Candidatus Xiphinematobacter	0	0	0	0	0	0	0	0	0	0	0	0	0	0	0	0	0	0	0	0	0	0	0	0	0	0	0	0	0	0	0	0	0	0	0	0	0	0	0	0	0	0	0	0	0	0	0	0	0
Capnocytophaga	0.00671659	0.00865464	0	0.0099108	0.0101487	0.00279861	0.0092002	0.00390701	0.00420221	0.0117458	0.0157888	0.00527065	0.00868923	0	0.0121763	0.0257677	0.004998	0.0262116	0.0133797	0.00838153	0.0174734	0.00742703	0.025172	0.0313421	0.0113413	0.0329525	0.0123954	0.00306204	0.0144844	0.0129608	0.0192597	0.0119289	0.0184038	0.00826993	0.0290529	0.004703	0.0124417	0	0.0245821	0.0233514	0.00971282	0.0183033	0.0137812	0	0	0	0	0.0275862	0.024496
Carboxydothermus	0	0	0	0.0033036	0	0	0	0.00390701	0	0	0	0	0.00434461	0	0	0	0	0	0	0	0	0	0	0.00313421	0.00378043	0	0	0	0	0	0	0	0	0	0	0	0.00622084	0	0	0	0	0	0	0	0	0	0.00367323	0	0
Carnobacterium	0.0033583	0	0	0.0066072	0	0	0.00306673	0	0	0	0.00947328	0	0	0	0.00405877	0	0.014994	0.00582479	0	0.00419076	0	0.00247568	0	0.00313421	0	0	0.00619771	0	0.00579374	0.0051843	0	0	0.00613459	0.0165399	0	0	0	0.00953653	0.00409702	0.00233514	0	0	0.00689061	0.00343749	0	0	0.00367323	0	0.0024496
Castellaniella	0.00671659	0	0	0.0033036	0.00507434	0	0.00613346	0	0.00420221	0	0.00315776	0	0	0	0	0.0128838	0	0	0.00334493	0	0.00582445	0	0.012586	0.00626841	0	0	0	0	0	0	0.00385193	0	0	0	0	0.004703	0	0	0.00819404	0	0.00647522	0.0152527	0.0103359	0	0	0	0.00734646	0	0.0024496
Catenulispora	0	0	0.00436986	0	0	0	0	0	0	0.00391527	0.00315776	0	0	0	0.00405877	0	0	0	0	0	0	0	0.00419533	0	0	0	0	0	0	0	0	0	0	0	0	0	0.00622084	0	0.00409702	0.00233514	0	0.00610109	0	0	0	0	0	0	0.0024496
Caulobacter	0.00671659	0	0.0349589	0.0231252	0.00507434	0.00839584	0.00306673	0.00390701	0.00840442	0.0156611	0.00631552	0.00527065	0	0.0113527	0.00811754	0	0.004998	0	0.00334493	0.0209538	0	0.00247568	0.00419533	0.00313421	0	0.00549209	0.00929656	0	0.00289687	0.00777645	0.00770386	0.0039763	0	0	0.0581058	0.00940601	0.0124417	0.00953653	0.00409702	0.00233514	0.00647522	0.00305055	0.00344531	0.00687498	0.00527037	0	0.00734646	0.0172414	0.0097984
Cc31virus	0	0	0.00436986	0	0	0	0	0	0	0	0	0	0	0	0	0	0	0	0	0	0	0	0	0	0	0	0	0	0	0	0	0	0	0	0	0	0	0	0	0	0	0	0	0	0	0	0	0	0
Cd119virus	0	0	0	0	0	0	0	0	0	0	0	0	0	0	0	0	0	0	0	0	0	0	0	0	0	0	0	0	0	0	0	0	0	0	0	0	0	0	0	0	0	0	0	0	0	0	0	0	0
Cedecea	0.00671659	0	0.0131096	0	0	0.00279861	0.00613346	0.011721	0.00420221	0	0.00315776	0	0	0.00283817	0.00405877	0	0	0	0	0.00419076	0	0	0.00839067	0	0.00378043	0.00549209	0.00929656	0	0.00579374	0.00259215	0.0115558	0.0079526	0	0.00826993	0	0.004703	0	0	0.00409702	0.00233514	0.00647522	0	0.00689061	0.00343749	0.00527037	0	0.00367323	0.00689655	0.0048992
Celeribacter	0.0033583	0	0.00873973	0.0066072	0	0.00279861	0.00306673	0.00390701	0.00420221	0.00783055	0	0.00527065	0	0	0.00811754	0.00429461	0	0	0	0	0	0.00742703	0.00419533	0.00626841	0	0.0164763	0.00309885	0.00306204	0.00289687	0.00259215	0.00770386	0.0039763	0	0.0124049	0	0.004703	0	0.00476826	0.00409702	0	0	0.00305055	0	0	0.0105407	0	0.00734646	0	0.0048992
Cellulomonas	0	0	0.00436986	0.0099108	0	0	0	0.00390701	0.0126066	0.00391527	0	0	0	0	0	0	0	0.00873718	0	0.00419076	0.0232978	0.00247568	0.00839067	0	0.00378043	0.00549209	0.00309885	0	0.00289687	0	0	0.0039763	0.0184038	0.00826993	0	0.004703	0	0.00476826	0.00409702	0.00467028	0.00323761	0.00305055	0.00689061	0.00343749	0.00527037	0	0	0.00689655	0
Cellulophaga	0.00671659	0.00865464	0	0.0033036	0	0.00279861	0	0.00781403	0.00420221	0	0.00315776	0	0.00434461	0.00283817	0	0	0	0.00291239	0	0	0	0	0.00839067	0	0	0.00549209	0.00309885	0	0.00289687	0.00259215	0	0	0	0.00413496	0	0	0	0	0.0122911	0.00233514	0.00323761	0.00305055	0	0	0	0	0.00367323	0.00344828	0
Cellulosilyticum	0.0134332	0.00865464	0.00873973	0.0066072	0	0.00559722	0.0122669	0.011721	0.0168088	0	0.0189466	0.0263532	0.0130338	0.00283817	0.00811754	0.0214731	0.009996	0.00291239	0.00668986	0.0167631	0.0174734	0.00247568	0.0167813	0.00940262	0.0189022	0.0109842	0.00929656	0.00612407	0.00579374	0.0466587	0.00385193	0.0039763	0.00613459	0.0289448	0	0.018812	0.00622084	0.0238413	0.0122911	0.00467028	0.00647522	0.00610109	0.0103359	0	0.00527037	0	0.00734646	0.0172414	0.0171472
Cellulosimicrobium	0	0	0	0.0066072	0	0	0.00306673	0.00390701	0.00420221	0.00783055	0	0	0	0	0	0	0	0	0	0.00419076	0.0174734	0	0	0	0	0	0	0	0.00579374	0	0	0	0	0	0	0	0	0	0	0	0	0	0.00344531	0	0	0.0101153	0.00367323	0	0
Cellvibrio	0	0	0	0	0	0	0	0.00390701	0	0	0	0	0	0	0	0	0	0	0	0	0	0	0	0.00313421	0.00378043	0.00549209	0	0	0	0	0	0.0039763	0	0	0	0	0.00622084	0	0	0.00233514	0	0	0	0.00343749	0	0	0	0	0
Chamaesiphon	0	0	0	0	0	0.00279861	0	0	0	0	0	0	0	0	0	0	0	0	0	0	0	0	0	0	0	0	0	0	0	0	0	0	0	0	0	0	0	0	0	0	0.00323761	0	0	0	0	0	0	0	0
Chania	0	0	0	0.0033036	0.00507434	0.00279861	0	0	0	0	0	0	0	0	0	0	0	0.00291239	0	0	0.00582445	0	0.00419533	0	0	0	0	0	0.00579374	0.0051843	0	0.0039763	0.00613459	0.00413496	0	0	0	0	0	0	0.00647522	0	0.00344531	0	0	0	0	0	0
Chelativorans	0	0	0.00436986	0	0	0	0	0	0	0	0	0	0	0	0	0	0	0	0	0	0	0	0	0	0	0	0	0	0	0	0	0.0039763	0.00613459	0	0	0	0	0	0	0.00233514	0	0	0	0	0	0	0	0.00344828	0
Chelatococcus	0.0033583	0.00432732	0	0.0033036	0.00507434	0	0.00306673	0	0.00420221	0	0.00315776	0.00527065	0	0	0	0.00429461	0.004998	0.00582479	0.00668986	0	0.00582445	0.00495135	0	0.00313421	0	0.00549209	0.00309885	0.00306204	0.00869061	0.0051843	0	0.0039763	0	0	0	0	0	0	0	0.00233514	0.00323761	0.0152527	0.00344531	0.00343749	0	0	0.00367323	0.0137931	0
Chitinophaga	0.0033583	0	0.00436986	0.0033036	0	0.00839584	0.00306673	0.00390701	0.00840442	0.00783055	0	0	0.00434461	0.00283817	0	0.00858922	0	0.00582479	0.00334493	0.00838153	0.00582445	0.00247568	0.00419533	0.00626841	0.00756086	0.0219684	0.00929656	0	0.0115875	0.00777645	0	0.0079526	0	0.00413496	0	0.004703	0	0.00476826	0.0163881	0.00233514	0.00647522	0.0213538	0	0.00343749	0	0	0.00734646	0.0103448	0.0073488
Chlamydia	0	0	0	0	0	0	0	0	0.00420221	0	0	0	0	0	0	0	0	0	0	0	0.00582445	0	0	0	0	0	0.00309885	0.00306204	0	0	0	0	0.00613459	0	0	0	0	0.00476826	0	0	0	0	0.00344531	0	0	0	0	0	0
Chlamydiamicrovirus	0	0	0	0	0	0	0	0	0	0	0	0	0	0	0	0	0	0	0	0	0	0	0	0	0	0	0	0	0	0	0	0	0	0	0	0	0	0	0	0	0	0	0	0	0	0	0	0	0
Chloracidobacterium	0	0	0.00436986	0	0	0	0	0	0	0.00783055	0	0	0	0	0	0	0	0	0	0	0	0	0	0	0	0	0	0	0	0	0	0.0039763	0	0	0	0	0	0	0.00409702	0.00233514	0	0.00305055	0.00344531	0	0	0	0	0.00344828	0
Chlorobaculum	0.00671659	0	0	0.0066072	0.00507434	0.00559722	0.00613346	0.00390701	0.0168088	0.0195764	0.012631	0	0	0.00283817	0.00405877	0.00858922	0.014994	0.0174744	0.0100348	0	0.0174734	0	0.012586	0	0	0	0.00929656	0.0122481	0.00869061	0.00259215	0.0115558	0.0159052	0.00613459	0.00413496	0	0	0	0.00953653	0.0286791	0.00467028	0	0.0122022	0	0.00687498	0	0	0.00367323	0.0206897	0.0024496
Chlorobium	0	0.00432732	0.00436986	0.0033036	0.00507434	0.00279861	0	0.00781403	0.0210111	0.00391527	0	0.00527065	0	0.00567634	0	0	0.004998	0.00873718	0	0.00838153	0.0116489	0.00495135	0.00839067	0	0.00378043	0.00549209	0	0	0.0173812	0.0051843	0.00385193	0.0079526	0.0122692	0.00413496	0	0.004703	0	0	0.00819404	0.0116757	0.00647522	0.00610109	0.00689061	0	0.00527037	0	0	0.00689655	0.0097984
Chloroflexus	0.0033583	0	0	0	0	0	0	0	0	0	0	0	0	0	0	0	0.004998	0.00291239	0	0	0	0	0.00419533	0	0	0.00549209	0	0.00306204	0	0	0	0	0	0	0	0	0	0.00476826	0	0	0	0	0	0	0	0	0	0	0.0024496
Chloroherpeton	0.0033583	0	0	0	0	0	0	0	0	0	0	0	0	0	0.00405877	0	0	0	0	0	0	0	0.00419533	0	0	0.0109842	0	0	0	0	0	0	0	0	0	0.004703	0	0	0	0	0	0	0	0	0	0	0	0	0.0024496
Chlorovirus	0	0	0	0	0	0	0	0	0.00420221	0	0	0	0	0	0	0	0	0	0	0	0	0	0	0	0	0	0.00309885	0	0	0	0	0	0	0	0	0	0	0	0	0	0	0.00305055	0	0	0	0	0	0	0
Chondrocystis	0	0	0	0	0	0	0	0	0	0	0	0	0	0	0	0	0	0	0	0	0	0	0	0	0	0	0	0	0	0	0	0	0	0	0	0	0	0	0	0	0	0	0	0	0	0	0	0	0
Chondromyces	0.0033583	0	0	0	0	0.00279861	0.00306673	0.00390701	0	0	0.00315776	0	0.00434461	0	0.00405877	0.00429461	0	0.00291239	0	0	0	0	0.00839067	0	0	0	0	0	0	0	0.00385193	0.0039763	0	0	0	0	0	0	0.0122911	0.00700542	0	0	0.00344531	0.00343749	0	0	0.00367323	0.00689655	0
Christensenella	0.0705242	0.0432732	0.187904	0.049554	0.0862638	0.0419792	0.122669	0.113303	0.0714376	0.0822207	0.135784	0.0210826	0.0955815	0.0823069	0.178586	0.0730084	0.134946	0.0931966	0.0568638	0.121532	0.0815423	0.0396108	0.109079	0.090892	0.0756086	0.0823814	0.0743725	0.0306204	0.0926999	0.0725802	0.0770386	0.226649	0.0490767	0.0744294	0	0.0611391	0.0746501	0.10967	0.0901344	0.0770596	0.016188	0.122022	0.0826873	0.0859372	0.0737852	0	0.080811	0.106897	0.0685888
Chromobacterium	0	0	0.0174795	0.0033036	0	0.00279861	0.00613346	0	0.00420221	0.00391527	0.00315776	0.0105413	0	0.00283817	0.00811754	0	0	0.00291239	0.00668986	0.00838153	0.00582445	0	0.00419533	0	0.00378043	0	0.00309885	0	0	0.00259215	0.00385193	0	0	0	0	0	0.00622084	0.00476826	0.0122911	0.00233514	0	0.00305055	0.00689061	0.00343749	0.00527037	0	0	0	0
Chromohalobacter	0	0	0.00436986	0	0	0.00279861	0	0.00390701	0	0	0.00315776	0	0	0	0.00405877	0	0	0	0	0	0	0	0	0	0	0	0	0	0	0.0051843	0	0.0039763	0	0	0	0	0.00622084	0	0	0	0.00323761	0	0	0	0	0	0.00367323	0	0
Chroococcidiopsis	0.0033583	0	0	0	0	0	0	0	0	0	0	0	0	0	0	0	0	0	0	0	0	0	0	0	0	0	0	0	0	0	0	0	0	0.00413496	0	0	0	0	0.00409702	0	0	0	0	0	0	0	0	0	0
Chryseobacterium	0.0134332	0.00432732	0.0480685	0.0594648	0.015223	0.0195903	0.0214671	0.0468842	0.0756398	0.00783055	0.012631	0.0210826	0.0173785	0.0141908	0.00405877	0.077303	0.089964	0.0203868	0.0401391	0.00838153	0.0116489	0.00247568	0.0209767	0.0188052	0.00756086	0.0274605	0.021692	0.00918611	0.023175	0.0207372	0.0231116	0.0159052	0.0184038	0.00826993	0	0.0564361	0.0497667	0.0333778	0.0573582	0.016346	0.016188	0.350813	0.044789	0.0103125	0.0105407	0	0.0146929	0.0172414	0.0710384
Chthonomonas	0	0	0	0	0	0	0	0	0.00420221	0	0	0	0	0	0	0	0	0	0	0	0	0	0	0	0	0	0	0	0	0.00259215	0	0.0039763	0	0	0	0	0.00622084	0	0.00409702	0	0	0	0	0	0	0	0.00367323	0	0
Circovirus	0	0	0	0	0	0	0	0	0	0	0	0	0	0	0	0	0	0	0	0	0	0	0	0	0	0	0	0	0	0	0	0	0	0	0	0	0	0	0	0	0	0	0	0	0	0	0	0	0
Citrobacter	0.0167915	0.0173093	0.0393288	0.0099108	0.228345	0.00839584	0.892419	0.0703262	0.0168088	0.00391527	0.00631552	13.3716	0.00868923	0.00567634	0	0.0257677	0.014994	0.00873718	0.0133797	0.0251446	0.0116489	0.00247568	0.0293673	0.00313421	0.00756086	0.0274605	0.0123954	0.0887991	0.0347625	1.28311	0.0462232	0.0159052	0.00613459	0.0951042	0	2.10695	9.39969	0.0238413	0.0245821	6.96806	0.0194256	0.0152527	0.0172265	10.5015	0.231896	0.222537	0.00367323	0.506897	1.34728
Citromicrobium	0	0	0	0	0	0	0	0	0	0	0	0	0	0	0	0	0	0	0	0	0	0	0.00419533	0	0	0	0	0.00306204	0	0	0	0	0	0	0	0	0	0	0.00409702	0.00233514	0	0	0.00344531	0	0	0	0	0	0.0048992
Clavibacter	0	0	0	0.0033036	0	0	0	0	0	0	0	0	0	0	0	0	0	0.00291239	0.00334493	0.00419076	0	0	0	0.00313421	0	0	0.00309885	0.00306204	0	0.0051843	0	0.0039763	0.00613459	0	0	0.004703	0	0.00953653	0.00409702	0.00233514	0	0.00305055	0.00344531	0.00343749	0	0.0101153	0.00367323	0	0.0048992
Cloacibacillus	0.0033583	0.00432732	0.0262192	0.0066072	0	1.32934	0.0153337	0.011721	0.0462243	0.00391527	0.0252621	0.0210826	0.00868923	0.00567634	0	0	0	0.029124	0.0133797	0.00838153	0.00582445	0	0.00839067	0.00626841	0.00756086	0.00549209	0.00619771	0.0183722	0.00579374	0.00777645	0.0154077	0.0159052	0	0.0124049	0	0	0.0124417	0	0.0122911	0.016346	0	0.0122022	1.82946	0.00343749	0.00527037	0	0.0183661	0.0103448	0.0073488
Clostridioides	0.221648	0.255312	0.581192	0.277502	0.441467	0.46457	0.30054	0.507912	0.277346	0.309307	0.290514	0.448005	0.269366	0.283817	0.409936	0.407988	1.03459	0.346575	0.254215	0.427458	0.448483	0.106454	0.385971	0.354165	0.362922	0.395431	0.449334	0.358258	0.266512	0.515838	0.47764	0.373772	0.447825	0.500331	0	0.338616	0.348367	0.514972	0.204851	0.312909	0.482404	0.289802	0.248062	0.354061	0.337304	0.708072	0.275492	0.272414	0.563408
Clostridium	0.372771	0.138474	0.467576	0.24777	0.350129	0.400201	0.248405	0.316468	0.491659	0.321052	0.372616	0.32678	0.139028	0.227053	0.385583	1.54606	2.84386	5.82188	0.264249	0.339452	0.442658	4.42156	0.348213	0.278944	0.257069	0.554701	0.359467	0.257211	0.338934	0.917621	1.65633	0.361843	0.404883	1.99719	0.0290529	1.55199	0.503888	1.44002	0.966896	0.371287	0.498592	0.295903	0.172265	0.433124	0.358385	2.94356	0.334264	0.17931	4.47297
Cnuibacter	0	0	0	0	0	0	0	0.00390701	0	0	0	0	0.00434461	0	0	0	0	0.00291239	0	0	0	0	0	0	0	0	0	0	0	0	0	0	0.00613459	0	0	0.004703	0	0	0	0	0	0.00610109	0.00344531	0	0	0	0	0	0.0024496
Cobetia	0	0	0.00436986	0	0	0	0	0	0	0	0	0	0	0.00283817	0	0	0	0	0	0	0	0	0	0	0	0	0	0	0	0	0	0	0.00613459	0	0	0	0	0	0	0	0	0	0	0	0	0	0	0	0.0048992
Coccolithovirus	0	0	0	0	0	0	0	0	0	0	0	0	0	0	0	0	0	0	0	0	0	0	0	0	0	0	0	0	0	0	0	0	0	0	0	0	0	0	0	0	0	0	0	0	0	0	0	0	0
Cohaesibacter	0	0	0	0.0033036	0.00507434	0	0.00306673	0	0	0.00391527	0	0	0	0	0.00811754	0.00858922	0.004998	0	0.00668986	0	0	0	0.00419533	0	0	0	0.00309885	0	0.00579374	0	0	0	0	0.00413496	0	0	0	0.00476826	0.00819404	0	0	0.00305055	0.00689061	0	0	0	0	0	0.0024496
Collimonas	0.0100749	0	0.0174795	0.0066072	0	0.00839584	0	0.011721	0.00840442	0.0117458	0.00315776	0	0	0.00283817	0.00405877	0	0.004998	0	0.00334493	0.00419076	0.0232978	0.00495135	0.00419533	0.00626841	0	0.0109842	0	0.00918611	0.00579374	0.00259215	0	0.0079526	0	0.0124049	0	0.00940601	0	0.00476826	0.0122911	0.00233514	0.00647522	0.00610109	0	0.00343749	0	0	0.00367323	0.00344828	0.0097984
Colwellia	0	0	0	0	0	0	0	0	0	0	0	0	0	0.00283817	0.00811754	0	0	0	0	0	0	0	0.00419533	0.00313421	0.00378043	0.00549209	0.00309885	0	0	0	0.00385193	0	0	0.00413496	0	0	0	0.00476826	0	0.00467028	0	0	0	0	0	0	0	0	0.0048992
Comamonas	0.00671659	0.012982	0.0174795	0	0.00507434	0	0.0153337	0.0351631	0.00840442	0.0234916	0.0189466	0	0.00868923	0.0085145	0.0202939	0.0214731	0.014994	0.0174744	0.0100348	0.00419076	0.0116489	0	0.012586	0.0188052	0.00378043	0.0274605	0.00929656	0.00612407	0.023175	0.0051843	0.0154077	0	0	0.0124049	0	0.00940601	0	0.0333778	0.0122911	0.016346	0.0129504	0.00915164	0.0103359	0.00687498	0.0105407	0.0101153	0.00734646	0.0103448	0.0073488
Conexibacter	0.0033583	0	0.00436986	0	0	0	0	0	0.00840442	0.00783055	0.00315776	0	0.00434461	0	0	0.00429461	0	0	0	0	0	0	0.00419533	0.00313421	0	0	0	0	0.00289687	0	0	0	0	0	0	0	0	0	0.00819404	0.00233514	0	0	0	0	0	0	0	0.0103448	0.0048992
Confluentimicrobium	0	0	0	0	0	0	0	0	0.00420221	0.00783055	0.00315776	0	0	0	0.00405877	0	0.004998	0	0.00334493	0.00419076	0	0	0	0.00313421	0	0	0	0	0.00579374	0	0	0.0039763	0	0	0	0	0	0.00476826	0.00819404	0.00233514	0.00323761	0.00305055	0	0	0.0105407	0	0	0	0.0024496
Congregibacter	0	0	0	0	0	0	0	0	0	0	0.00315776	0	0	0	0	0	0	0	0	0	0	0	0	0	0	0	0	0	0	0	0	0	0	0	0	0	0	0	0	0	0	0	0	0	0	0	0	0	0
Coprothermobacter	0	0	0	0	0	0	0	0	0	0	0	0	0	0	0	0	0	0	0	0	0	0	0	0	0	0	0	0	0	0	0	0	0	0	0	0	0	0	0	0	0	0	0	0	0	0	0	0	0
Coraliomargarita	0	0	0	0.0033036	0	0	0.00306673	0.00390701	0.00840442	0.00783055	0.00947328	0	0.00434461	0.00283817	0	0	0.004998	0.00291239	0	0.00419076	0	0	0.00419533	0.00313421	0.00378043	0	0.00309885	0	0.00289687	0.00259215	0.00770386	0	0	0	0	0	0	0.00953653	0	0.00934056	0	0.00915164	0	0	0.00527037	0	0.00367323	0.00689655	0.0024496
Corallococcus	0	0	0.00873973	0	0	0	0	0.00390701	0.00420221	0.00391527	0.00947328	0.00527065	0	0	0.00405877	0	0	0	0	0	0.00582445	0	0.00419533	0	0	0	0.00309885	0	0.00579374	0	0.00385193	0.0039763	0.00613459	0	0	0	0.00622084	0	0.00409702	0.00233514	0	0	0	0	0	0	0	0.00689655	0.0073488
Coriobacterium	0.0369413	0.00432732	0.0436987	0.0264288	0.0253717	0.0111944	0	0.0390701	0.0462243	0.0548138	0.0315776	0.0158119	0.0434461	0.017029	0.0689991	0.0300623	0.034986	0.0262116	0.046829	0.0251446	0.0232978	0.00495135	0.037758	0.0344763	0.0491456	0.0659051	0.0371862	0.00918611	0.0376593	0.0233294	0.0385193	0.0198815	0.0613459	0.00413496	0	0.0611391	0	0.0524509	0.0573582	0.0396974	0.0582769	0.0366066	0.0206718	0	0.0316222	0	0.0220394	0.0448276	0.0220464
Corynebacterium	0.0839574	0.0259639	5.79881	0.122233	0.030446	0.0615695	0.0521344	0.0429771	0.168088	0.0783055	0.0852596	0.0527065	0.0130338	0.0198672	0.0608816	0.0343569	0.129948	0.0524231	0.0836232	0.0586707	0.15726	0.0321838	0.113274	0.0846236	0.0340239	0.153779	0.0960645	0.0336824	0.13905	0.0544352	0.057779	0.039763	0.110423	0.0578895	0.0581058	0.0611391	0.0746501	0.0524509	0.135202	0.0607136	0.0485641	0.122022	0.0378984	0.0515623	0.042163	0.0404613	0.0734646	0.117241	0.12248
Coxiella	0	0	0	0	0	0.00279861	0	0	0	0.00391527	0	0	0	0	0	0	0	0	0	0	0	0	0	0	0	0	0	0	0	0	0	0	0	0	0	0	0	0	0	0	0	0	0	0	0	0	0	0.00344828	0
Cp1virus	0	0	0	0	0	0	0	0	0	0	0	0	0	0	0	0	0	0	0	0	0	0	0	0	0	0	0	0	0	0	0	0	0	0	0	0	0	0	0	0	0	0	0	0	0	0	0	0	0
Cr3virus	0	0	0	0	0	0	0	0	0	0	0	0	0	0	0	0	0	0	0	0	0	0	0	0	0	0	0	0	0	0	0	0	0	0	0	0	0	0	0	0	0	0	0	0	0	0	0	0	0
Crinalium	0	0	0	0	0	0	0	0	0	0	0	0	0	0	0	0	0	0	0	0	0	0	0	0	0	0	0	0	0	0	0	0	0	0	0	0	0	0	0	0	0	0	0	0	0	0	0	0	0
Croceibacter	0	0	0	0	0	0	0	0	0	0	0	0	0	0	0	0	0	0	0	0	0	0	0	0	0	0	0	0	0	0	0	0	0	0	0	0	0	0	0	0	0	0	0	0	0	0	0	0	0
Croceicoccus	0	0	0	0	0	0	0	0.00390701	0.00420221	0.00391527	0	0	0	0	0	0	0	0	0.00334493	0.00419076	0	0	0	0	0	0.00549209	0	0	0	0.00259215	0	0	0	0	0	0	0	0	0	0	0	0	0.00344531	0.00343749	0	0	0	0	0.0048992
Cronobacter	0.0100749	0	0.00436986	0.0033036	0	0.00279861	0.00613346	0.0273491	0.00840442	0.00391527	0.012631	0.00527065	0.00868923	0.00283817	0.00405877	0.00429461	0.009996	0.00582479	0.00668986	0.00838153	0.0174734	0.00247568	0.012586	0	0.00756086	0.0109842	0.00309885	0.0275583	0.00579374	0.0051843	0.0192597	0.0079526	0	0.0165399	0	0.018812	0.0870918	0.00953653	0.0122911	0.00467028	0.00647522	0.00915164	0	0.00687498	0.00527037	0	0	0	0.0342944
Cryobacterium	0	0	0.0131096	0.0066072	0	0	0	0.00390701	0	0	0	0	0	0	0.00405877	0	0.009996	0.00291239	0.00334493	0.00419076	0.00582445	0.00247568	0	0	0	0	0	0	0.00289687	0	0	0.0039763	0.00613459	0.00826993	0	0	0.00622084	0	0.00409702	0.00233514	0	0.00610109	0	0.00687498	0	0	0.00367323	0.00344828	0
Cryptobacterium	0	0	0.00436986	0	0	0	0.0122669	0	0	0	0	0	0	0.00283817	0	0	0	0.00582479	0.00334493	0	0	0	0	0	0.00378043	0	0	0	0.00289687	0.00259215	0.00770386	0	0	0	0	0.004703	0.0124417	0	0	0	0.00323761	0.00305055	0	0	0	0	0.00367323	0	0
Cupriavidus	0.0134332	0	0.0349589	0.016518	0	0.0167917	0.0122669	0.0429771	0.0252133	0.0234916	0.00631552	0.0210826	0.00434461	0.0141908	0.0162351	0.0214731	0.009996	0.00582479	0.0267594	0.0167631	0.0349467	0.00990271	0.0461487	0.0219394	0	0.0384446	0.00929656	0.00918611	0.0202781	0.0051843	0.00770386	0.0159052	0.00613459	0.00826993	0	0.018812	0.0186625	0.00953653	0.00819404	0.016346	0.0194256	0.033556	0.0103359	0.01375	0.0158111	0	0.0146929	0.00344828	0.0171472
Curtobacterium	0	0	0.00436986	0.0033036	0	0	0	0.00390701	0.00420221	0	0.00315776	0	0	0	0	0.00429461	0	0	0	0	0.00582445	0	0	0.00313421	0	0	0.00309885	0	0	0	0	0	0	0	0	0	0.00622084	0	0	0.00233514	0.00323761	0	0.0103359	0	0	0	0	0.00344828	0.0024496
Curvibacter	0	0	0.0131096	0	0	0	0	0	0	0.00391527	0.00315776	0	0	0.00283817	0.00405877	0	0	0.00582479	0	0.00419076	0	0	0	0.00313421	0	0.00549209	0.00619771	0	0.00579374	0	0.00385193	0	0	0	0	0.004703	0.00622084	0	0.0122911	0.00233514	0	0	0.00344531	0	0	0	0.00367323	0	0.0024496
Cutibacterium	0.00671659	0	0.0174795	0.0363396	0	0.00279861	0.00613346	0	0.00420221	0	0	0	0	0	0	0.00858922	0	0	0.00668986	0.00419076	0.064069	0.00247568	0	0	0	0.0109842	0.00309885	0.00306204	0.00579374	0.0051843	0	0	0.0122692	0	0.0290529	0	0	0	0.0245821	0.00467028	0.00647522	0.00610109	0	0.00343749	0	0.0303459	0.00734646	0	0
Cyanobacterium	0	0	0	0	0	0.00279861	0	0	0	0	0.00315776	0	0	0	0	0	0	0.00291239	0	0	0	0	0	0	0	0	0.00309885	0	0	0.00259215	0	0	0	0	0	0	0	0	0	0	0	0	0	0	0	0	0	0	0
Cyanobium	0	0	0.0218493	0.0132144	0	0.00559722	0.00613346	0.00781403	0	0.0117458	0.00315776	0	0	0	0	0.00429461	0.004998	0.00291239	0.00668986	0	0	0	0.00839067	0.00626841	0	0.0164763	0	0.00612407	0.00579374	0.00777645	0	0.0039763	0	0	0	0.004703	0	0.00476826	0.0163881	0.00934056	0.00323761	0.00610109	0.00689061	0.00343749	0	0	0.00367323	0	0.0048992
Cyanothece	0	0	0.00436986	0.0033036	0	0	0	0	0	0.00391527	0	0	0	0	0	0	0.004998	0.00291239	0	0.00419076	0	0.00495135	0	0.00313421	0	0.0109842	0	0	0.00579374	0.00259215	0	0.0159052	0	0	0	0.004703	0	0	0	0	0.00323761	0.00305055	0	0.00343749	0	0	0.00367323	0	0.0024496
Cyclobacterium	0	0	0	0	0	0	0	0	0	0	0	0	0	0	0	0	0	0	0	0	0	0	0	0	0	0	0	0	0	0	0	0	0	0	0	0	0	0	0	0	0	0	0	0	0	0	0	0	0.0024496
Cycloclasticus	0	0	0	0	0	0	0	0	0	0	0	0	0	0	0	0	0	0	0	0	0	0	0	0	0	0	0	0	0	0	0	0	0	0	0	0	0	0	0	0	0	0	0	0	0	0	0	0	0
Cylindrospermum	0	0	0	0.0033036	0	0	0	0	0	0	0.00315776	0	0	0	0	0	0	0	0	0	0	0	0	0	0	0	0	0	0.00289687	0	0	0	0	0	0	0	0	0	0	0	0	0	0	0	0	0	0	0	0
Cyprinivirus	0	0	0	0	0	0	0	0	0	0	0	0	0	0	0	0	0	0	0	0	0	0	0	0	0	0	0	0	0	0	0	0	0	0	0	0	0	0	0	0	0	0	0	0	0	0	0	0	0
Cystobacter	0	0	0.00873973	0.0066072	0	0	0	0	0.00840442	0.00391527	0.00631552	0.00527065	0	0.00283817	0	0	0.009996	0.00582479	0.00668986	0	0	0	0.00839067	0.00313421	0	0.00549209	0	0	0	0.00259215	0	0.0039763	0	0.00413496	0	0	0	0	0	0.00233514	0.00323761	0.00610109	0	0.00343749	0.00527037	0	0.00367323	0	0.0024496
Cytophaga	0.0033583	0	0	0	0	0	0	0	0	0	0	0	0	0	0	0	0	0	0	0	0	0	0.00419533	0	0	0.0109842	0	0	0	0	0	0.0079526	0	0	0	0	0	0.00476826	0	0	0.00323761	0	0.00344531	0	0.00527037	0	0	0	0
Dactylococcopsis	0	0	0	0	0	0	0	0	0	0.00391527	0	0	0	0	0.00405877	0.00429461	0	0	0	0	0	0	0	0	0	0	0	0	0	0.00259215	0	0	0	0	0	0	0	0	0.00409702	0	0	0.00305055	0	0	0	0	0	0.00344828	0
Dechloromonas	0.0033583	0	0.00436986	0	0	0	0	0.00390701	0.00420221	0	0	0	0.00434461	0.00283817	0	0	0	0	0	0	0	0	0	0	0	0.00549209	0	0	0.00289687	0	0	0	0	0	0	0	0	0	0.00409702	0	0	0	0	0	0	0	0	0.00344828	0.0024496
Deferribacter	0	0	0.00436986	0	0	0	0	0	0	0.00391527	0	0	0	0	0	0	0	0	0	0	0	0	0	0	0	0	0	0	0	0	0	0	0	0	0	0	0	0	0	0	0	0	0	0	0	0	0	0	0
Defluviimonas	0	0	0.00873973	0	0	0	0	0	0	0	0.00315776	0	0	0	0	0	0	0	0	0	0	0	0	0	0	0	0	0	0.00289687	0.00259215	0	0	0	0	0	0.004703	0	0	0	0	0	0.00305055	0.00344531	0	0	0	0	0	0
Defluviitoga	0	0	0	0	0	0	0	0	0	0	0	0	0	0	0	0.00429461	0	0	0	0	0	0	0	0	0	0	0	0	0	0	0	0	0	0.00413496	0	0	0	0	0	0	0	0	0	0	0	0	0	0	0
Dehalobacter	0	0	0.00873973	0.0099108	0.0101487	0.00559722	0.00613346	0.011721	0.00420221	0.00783055	0	0	0.00868923	0	0.00405877	0.00429461	0.014994	0.0174744	0.0133797	0.00838153	0.0116489	0.00495135	0.00839067	0.00626841	0.0113413	0.0109842	0.00309885	0.00612407	0.00289687	0.00259215	0	0.0278341	0.00613459	0.00826993	0	0	0	0.0190731	0.00409702	0.00934056	0.00323761	0	0	0.00343749	0.00527037	0	0.00734646	0.0103448	0.012248
Dehalobacterium	0.0033583	0.00432732	0.0218493	0.0033036	0	0.00559722	0.00613346	0.00390701	0.0168088	0.00783055	0.00631552	0	0.00434461	0.0085145	0.0162351	0.00858922	0.014994	0.00582479	0.00668986	0.00838153	0.00582445	0.00247568	0	0.0125368	0	0.00549209	0.0185931	0.00306204	0.00579374	0.00259215	0.0192597	0.0119289	0.0368076	0.00413496	0	0.004703	0.0124417	0.00476826	0.00819404	0.00467028	0.00323761	0.00610109	0.00689061	0.00343749	0	0	0.00734646	0.00689655	0.0097984
Dehalococcoides	0	0	0.00873973	0.0066072	0	0.00559722	0.00613346	0	0.0126066	0.00391527	0	0	0	0.00283817	0	0.0429461	0	0.00582479	0.0234145	0.00419076	0	0.00495135	0	0.00313421	0	0	0	0	0.00289687	0.0259215	0.00770386	0.0159052	0	0	0	0.00940601	0	0	0	0.00700542	0.00647522	0.00610109	0.00344531	0	0	0	0.00367323	0	0.0048992
Dehalogenimonas	0	0	0.00873973	0.0033036	0	0	0	0.0156281	0	0	0.00315776	0	0	0	0.00405877	0.00429461	0.004998	0	0	0	0	0	0	0	0	0.00549209	0	0.00306204	0.00289687	0.00259215	0	0.0039763	0	0	0	0.004703	0	0	0.00409702	0	0	0.00305055	0	0.00343749	0.00527037	0	0.00367323	0.00689655	0.0024496
Deinococcus	0.0134332	0	0.065548	0.0363396	0.00507434	0.0111944	0.0153337	0.0156281	0.0210111	0.043068	0.0189466	0.0105413	0.0173785	0.00567634	0.0243526	0.0128838	0.034986	0.0262116	0.0100348	0.0209538	0.0174734	0.00495135	0.0671254	0.0282079	0.00756086	0.0494288	0.0185931	0.0153102	0.0463499	0.0181451	0.0154077	0.0238578	0.00613459	0.00826993	0	0.028218	0.0124417	0.0190731	0.0614553	0.0280217	0.0259009	0.0396571	0.0310078	0.0171874	0.0105407	0	0.00734646	0.0103448	0.0465424
Delftia	0.00671659	0	0.00436986	0	0	0.00279861	0	0.00390701	0.00420221	0.00783055	0	0	0	0	0.00811754	0.00429461	0	0	0.00668986	0.00419076	0.00582445	0.00495135	0.00839067	0.00313421	0	0.00549209	0	0	0.00579374	0	0	0	0	0	0.0290529	0	0	0.00953653	0.00409702	0.00233514	0	0	0	0.00343749	0	0	0	0	0
Denitrobacterium	0.0201498	0.00432732	0.0174795	0.0132144	0.015223	0.00279861	0.0184004	0.0195351	0.00840442	0.0195764	0.00631552	0.00527065	0	0.00567634	0.0162351	0.0171784	0.009996	0.014562	0.0434841	0.00419076	0	0.00742703	0.025172	0.015671	0.0113413	0.0164763	0.0123954	0.00612407	0.0318656	0.0103686	0.00770386	0.0119289	0.0122692	0.00413496	0	0.0517331	0.0622084	0.0143048	0.0163881	0.0116757	0.0226633	0.033556	0.00689061	0.00687498	0.0210815	0	0.0330591	0.0137931	0.024496
Denitrovibrio	0	0	0	0.0066072	0	0	0	0	0	0	0	0	0	0	0	0	0	0	0	0.00419076	0	0	0	0	0	0	0	0	0	0	0	0	0	0	0	0	0	0	0	0	0	0.00305055	0	0	0	0	0	0	0
Dermabacter	0	0	0.00873973	0	0	0	0	0	0.00840442	0.00391527	0	0	0	0	0	0.00429461	0.004998	0	0.00334493	0	0	0	0	0	0	0	0.00309885	0	0	0	0	0	0.00613459	0	0	0	0	0.00476826	0.00409702	0.00233514	0	0	0.00344531	0	0	0	0	0.00344828	0
Dermacoccus	0.0033583	0	0	0.0099108	0	0	0.00306673	0	0.00420221	0.00783055	0	0	0	0	0.00811754	0	0.004998	0.00291239	0.00334493	0.00419076	0	0	0	0	0	0	0.00619771	0	0	0	0.00385193	0	0.00613459	0.00413496	0	0.004703	0	0.00476826	0.00819404	0.00467028	0	0	0	0	0	0	0.00367323	0	0.0073488
Dermatophilus	0	0	0.00436986	0	0	0.00279861	0	0	0	0	0	0	0.00434461	0	0	0	0	0	0	0	0	0	0.00419533	0	0	0	0	0	0	0	0	0	0	0	0	0	0	0	0	0	0.00323761	0	0	0	0	0	0	0	0
Desulfarculus	0.0033583	0	0.0174795	0.0099108	0	0.00559722	0	0.00781403	0.00420221	0.0156611	0	0	0	0.00283817	0.0121763	0	0	0.00291239	0.00334493	0.00838153	0.00582445	0	0.012586	0.00313421	0	0.00549209	0.00309885	0.00306204	0.00579374	0.00259215	0.00385193	0.0039763	0.0122692	0	0	0	0	0	0.0122911	0.00467028	0	0.00915164	0.00344531	0.00687498	0	0	0.00367323	0.00689655	0.0097984
Desulfatibacillum	0.0033583	0	0.0305891	0	0	0	0.0092002	0	0.00420221	0	0.00631552	0	0	0	0.0121763	0	0	0.00291239	0	0	0	0	0	0.00626841	0	0	0	0	0.00289687	0	0.00770386	0.0198815	0.00613459	0	0	0.004703	0	0	0.00409702	0	0	0.00610109	0.00689061	0	0	0	0.00367323	0	0.0048992
Desulfitobacterium	0.0100749	0	0.0218493	0.0099108	0.00507434	0.0167917	0.00613346	0.0195351	0.0252133	0.0156611	0.0189466	0.0105413	0	0.0113527	0.00811754	0.00858922	0.02499	0.014562	0.0167246	0.00419076	0.0291223	0.00247568	0.0335627	0.015671	0.0113413	0.0109842	0.0154943	0.0153102	0.0173812	0.0155529	0.00385193	0.0119289	0.0122692	0.00826993	0	0.004703	0	0.0190731	0.0122911	0.0116757	0.00647522	0.0122022	0.00689061	0.00687498	0.0158111	0	0.00734646	0.0206897	0.0195968
Desulfobacca	0	0	0.00436986	0	0	0	0	0.00390701	0	0.00783055	0.00631552	0	0.00434461	0	0	0	0	0	0	0	0.00582445	0.00247568	0.00419533	0	0	0.00549209	0.00309885	0.00306204	0	0	0	0.0079526	0	0	0	0	0	0	0.00409702	0.00233514	0.00323761	0	0	0	0	0.0101153	0.00367323	0.00344828	0.0024496
Desulfobacter	0	0	0	0.0132144	0	0.00279861	0.00306673	0	0	0	0.00315776	0	0	0	0	0	0	0	0	0.00419076	0	0.00247568	0	0	0	0.00549209	0	0	0	0	0	0	0.00613459	0	0	0	0.00622084	0	0	0	0	0	0	0	0	0	0	0	0
Desulfobacterium	0	0	0.00436986	0.0033036	0	0.00279861	0.00306673	0.00781403	0.00420221	0	0.00315776	0	0.00434461	0	0	0.00429461	0	0.00582479	0	0	0	0	0.00839067	0	0	0.0109842	0	0.00306204	0.00579374	0	0.00385193	0	0	0	0	0	0	0	0	0	0	0.00305055	0	0.00687498	0	0	0	0.00344828	0.0048992
Desulfobacula	0	0	0	0.0033036	0	0	0	0.00390701	0	0	0	0	0.00434461	0	0	0	0	0	0	0	0	0	0	0	0	0.00549209	0	0	0	0	0	0	0	0	0	0	0.00622084	0	0	0	0.00323761	0	0	0.00343749	0	0	0.00367323	0.00344828	0
Desulfobulbus	0.0033583	0	0.00436986	0.0033036	0	0	0	0	0	0	0.00631552	0	0	0.00283817	0.00405877	0	0	0.00582479	0.00334493	0.00419076	0.0116489	0.00495135	0.00419533	0.00313421	0.00378043	0	0	0	0	0	0	0.0039763	0	0.00413496	0	0.004703	0	0.00476826	0	0.00467028	0	0.00305055	0	0.00343749	0.00527037	0	0	0	0.0024496
Desulfocapsa	0	0	0	0	0	0	0	0	0	0	0	0	0	0	0	0	0	0	0.00334493	0	0	0	0	0.00626841	0	0	0	0	0	0	0	0	0	0	0	0	0	0	0	0	0	0.00305055	0	0	0	0	0	0	0
Desulfococcus	0.0033583	0	0	0	0	0	0.0092002	0.00781403	0.0126066	0	0.00947328	0	0	0	0	0.00429461	0.019992	0.00582479	0.00668986	0.0125723	0.0116489	0	0.00419533	0.00313421	0.00378043	0.00549209	0	0	0.00289687	0	0.00385193	0.0039763	0	0	0	0	0.00622084	0.00953653	0.0163881	0	0.00323761	0.00305055	0.0137812	0	0.00527037	0	0.0110197	0	0.0097984
Desulfohalobium	0.0033583	0	0	0	0	0	0	0	0	0	0.00315776	0	0	0.00283817	0.00405877	0	0	0.00291239	0.00334493	0.00419076	0	0.00247568	0	0	0	0	0	0	0.00289687	0.0051843	0.00385193	0.0039763	0	0	0	0.004703	0	0	0.00409702	0.00467028	0	0	0.00689061	0	0.00527037	0.0101153	0.00367323	0	0.0024496
Desulfomicrobium	0.0235081	0	0.00873973	0.0033036	0.00507434	0.00839584	0.00613346	0.00781403	0.0252133	0.00783055	0.0189466	0	0.00434461	0.00283817	0.0162351	0.00858922	0.02499	0.0203868	0.0100348	0.00838153	0.00582445	0.00495135	0.00839067	0.0125368	0.00756086	0.0109842	0.00619771	0.00918611	0.0144844	0	0.00385193	0.0318104	0.0184038	0	0	0.014109	0.0186625	0	0.0327761	0.0140108	0.00323761	0.0122022	0.00689061	0.00343749	0.0210815	0.0101153	0.00734646	0.0172414	0.0220464
Desulfomonile	0	0	0	0	0	0	0	0	0.00420221	0	0	0	0	0	0.00405877	0	0	0.00291239	0.00334493	0	0	0	0.00419533	0	0	0	0.00309885	0	0.00289687	0	0	0	0	0	0	0	0	0	0	0	0	0	0	0.00343749	0	0	0	0	0
Desulfosporosinus	0.0100749	0.00432732	0.0174795	0.0066072	0	0.0111944	0.0122669	0.00781403	0.0126066	0.00783055	0.00631552	0.0158119	0.00434461	0.00567634	0.0202939	0.00858922	0.014994	0.014562	0.0133797	0.00838153	0.0116489	0.00990271	0.0209767	0.00940262	0	0.0164763	0.00929656	0.0153102	0.00869061	0.00259215	0.00770386	0.0159052	0.00613459	0.00826993	0	0.00940601	0.0248834	0.0143048	0.0122911	0.0140108	0.016188	0.0183033	0.00689061	0.01375	0.0105407	0.0101153	0.0220394	0.0137931	0.0097984
Desulfotalea	0	0.00432732	0	0	0	0	0	0	0	0	0	0	0	0	0	0	0.004998	0	0	0	0	0	0	0	0	0	0	0	0	0.00259215	0	0	0	0	0	0	0	0	0	0	0	0.00305055	0	0	0	0	0	0	0.0024496
Desulfotomaculum	0.0134332	0	0.0349589	0.0099108	0.0101487	0.0251875	0.0184004	0.0312561	0.0252133	0.0156611	0.0315776	0.0105413	0.0130338	0.0141908	0.0202939	0.00858922	0.019992	0.0262116	0.0234145	0.00838153	0.00582445	0.00990271	0.012586	0	0.0189022	0.0274605	0.0185931	0.00918611	0.0173812	0.0129608	0.00770386	0.0357867	0	0.0124049	0	0.004703	0.0311042	0.0190731	0.00409702	0.0116757	0.00647522	0.0244044	0.0206718	0.0103125	0.0105407	0	0.0110197	0.0137931	0.0269456
Desulfovibrio	0.144407	0.00865464	0.222863	0.0925008	0.030446	0.0223889	0.0368008	0.0820473	5.41245	5.03113	0.363143	0.0210826	0.0304123	0.0312198	5.30075	0.0343569	3.96841	4.08609	0.133797	0.226301	0.064069	0.163395	0.650277	3.30659	0.0491456	0.0933656	0.0309885	0.107171	0.121669	0.0699881	0.901352	2.73172	0.312864	0.0165399	0	0.0799511	0.0622084	0.252718	1.17994	0.408649	0.0259009	4.68564	4.59259	0.0274999	0.674607	0.0505766	0.0514252	0.182759	3.50293
Desulfurella	0	0	0	0	0	0	0	0	0	0	0	0	0	0	0	0	0	0	0	0	0	0	0	0	0	0	0	0	0	0.00259215	0	0	0	0	0	0	0	0	0	0	0	0	0	0	0	0	0	0	0
Desulfurispirillum	0.0033583	0	0	0.0033036	0	0.00279861	0.00613346	0	0.00420221	0.00391527	0.00315776	0	0	0	0	0	0	0.0116496	0.0100348	0	0.0174734	0	0.00419533	0.00940262	0	0.0109842	0	0.00306204	0	0	0	0.0039763	0	0	0	0	0	0.00953653	0.00409702	0.00233514	0	0.00610109	0	0.00343749	0	0	0	0.00344828	0.0146976
Desulfurivibrio	0	0	0.00436986	0.0099108	0	0.00279861	0.00613346	0.00781403	0.00840442	0.00783055	0.00315776	0	0	0	0.00811754	0	0.004998	0.00291239	0.00334493	0	0.0174734	0	0	0.00940262	0	0.0109842	0	0	0.00869061	0	0.00385193	0.0039763	0	0	0	0.00940601	0	0	0.0122911	0.00233514	0	0.0122022	0.00344531	0	0.00527037	0.0202306	0	0.00689655	0.0073488
Desulfurobacterium	0	0	0	0	0	0	0	0	0	0	0	0	0	0	0	0	0	0	0	0	0	0	0	0.00313421	0	0	0	0.00306204	0	0.00259215	0	0	0	0	0	0	0	0	0	0	0.00323761	0.00305055	0	0	0	0	0	0	0
Desulfuromonas	0	0	0.00873973	0.0099108	0.00507434	0.0111944	0.00613346	0.011721	0.00840442	0.0156611	0.00947328	0	0.00434461	0	0.0162351	0.00858922	0.009996	0.00582479	0.0100348	0.00419076	0.0116489	0	0.0167813	0.0188052	0	0.0164763	0.00929656	0.00612407	0.0115875	0.0155529	0	0.0198815	0	0.00413496	0	0.004703	0	0.00953653	0.0163881	0.00467028	0.00647522	0.00610109	0.0172265	0.00687498	0.0105407	0.0202306	0.00367323	0.00689655	0.0097984
Devosia	0	0.00432732	0.00436986	0.0033036	0	0.00559722	0	0.011721	0.00420221	0.0117458	0	0	0.00434461	0	0.0121763	0	0.009996	0.0116496	0.00334493	0.00838153	0.00582445	0.00247568	0.0167813	0.00313421	0.00756086	0.0164763	0	0.00612407	0	0.00259215	0.00385193	0.0039763	0	0	0	0.004703	0	0.0143048	0.00819404	0.00934056	0.00971282	0.00915164	0.0137812	0	0	0	0.00734646	0.00689655	0.0073488
Devriesea	0	0	0	0	0	0	0	0	0	0.00391527	0	0	0	0	0	0	0	0	0	0	0	0	0.00419533	0	0	0	0.00309885	0	0	0	0.00385193	0	0	0	0	0	0	0	0.00409702	0.00467028	0	0	0	0.00343749	0	0	0	0	0
Dialister	0.0235081	0.203384	0.00436986	0.0066072	1.48171	0	0.0092002	0	0.00840442	0.00783055	0.00315776	0.121225	0	0	0.0324702	0	0.004998	0.00291239	0.00668986	0.0167631	0.192207	0.5496	0.00839067	0.00313421	0	0.494288	0.00309885	0.00306204	0.0434531	0	0.00385193	0.0079526	0.0122692	0.169534	0	0	0	0.286096	0.0491642	0.00934056	0.074465	0.00305055	0.0310078	0	3.48898	0	0	0	0.0048992
Diaphorobacter	0	0	0	0	0	0	0	0	0	0	0	0	0	0	0	0	0	0	0	0	0	0	0	0	0	0.00549209	0	0	0	0	0	0	0	0	0	0	0	0	0	0	0	0	0	0	0	0	0	0	0
Dichelobacter	0	0	0	0	0	0	0	0	0	0	0	0	0	0	0	0	0	0	0	0	0	0	0	0	0	0	0	0	0	0	0	0	0	0	0	0	0	0	0	0	0	0	0	0	0	0	0	0	0
Dickeya	0.0167915	0.00432732	0.0218493	0.0099108	0.00507434	0.00839584	0.0306673	0.011721	0.0168088	0.00391527	0.012631	0.0210826	0.00868923	0.0141908	0.00811754	0.0128838	0.014994	0.0174744	0.0200696	0.00419076	0.0232978	0.00990271	0.0167813	0.00940262	0.0151217	0.0109842	0.00309885	0.0153102	0.0202781	0.0129608	0.0115558	0.0238578	0	0.0165399	0	0.023515	0.0186625	0.0476826	0.00409702	0.0186811	0.00647522	0.00915164	0.00689061	0.01375	0.0210815	0	0.00734646	0.00344828	0.012248
Dictyoglomus	0.0033583	0	0	0	0	0	0	0	0	0	0	0	0	0	0	0	0.004998	0	0.00668986	0	0	0	0	0	0.00378043	0	0	0	0	0	0	0	0	0	0	0	0	0	0	0.00233514	0.00323761	0.00305055	0	0	0	0	0	0	0.0024496
Dietzia	0	0	0	0.0033036	0	0	0	0	0	0	0	0	0	0	0	0	0	0	0	0	0	0	0	0	0	0.00549209	0	0	0	0	0	0	0	0	0	0	0	0	0	0	0	0.00305055	0	0	0	0	0	0	0
Dinoroseobacter	0.00671659	0	0.00436986	0.0033036	0	0.00279861	0	0.00390701	0	0.00783055	0	0	0	0	0.00405877	0	0	0.00291239	0.00334493	0.00419076	0.00582445	0	0	0.00313421	0	0.00549209	0	0	0	0	0	0	0	0.00413496	0	0.00940601	0	0	0	0	0	0.00305055	0	0	0	0	0	0	0.0024496
Dokdonella	0	0	0.00873973	0.0033036	0	0.00279861	0	0	0.00420221	0.00391527	0	0	0	0	0.00405877	0	0.004998	0.00582479	0.00334493	0.00419076	0	0	0.00839067	0	0	0.00549209	0	0	0.00289687	0	0.00385193	0	0	0	0	0.00940601	0	0	0	0	0	0.00610109	0.00344531	0	0.00527037	0	0	0	0
Dokdonia	0.0033583	0	0.00436986	0	0	0.00559722	0	0.00390701	0	0.00783055	0	0	0	0	0.00405877	0	0	0	0	0	0	0	0	0	0	0.0109842	0	0	0.00289687	0.00259215	0.00385193	0	0	0	0	0.004703	0	0	0.00409702	0.00233514	0.00647522	0.00610109	0	0	0.00527037	0	0	0	0
Dolichospermum	0	0	0	0	0	0	0	0	0.00420221	0	0	0	0	0	0	0	0	0	0	0	0	0	0	0	0	0	0	0	0	0	0	0	0	0	0	0	0	0	0	0	0	0.00305055	0	0	0	0	0	0	0
Draconibacterium	0.00671659	0	0	0.0099108	0	0.00279861	0	0.011721	0.00420221	0.00391527	0.00315776	0	0	0	0.00811754	0	0.004998	0.00291239	0.00668986	0.00419076	0	0.00247568	0.012586	0.00940262	0	0.0109842	0	0.00306204	0.00289687	0.0051843	0.00385193	0	0	0	0	0.00940601	0.00622084	0	0.0122911	0.00467028	0.00647522	0.00305055	0	0	0	0	0	0	0.0024496
Dyadobacter	0	0	0	0.0066072	0	0	0	0.00390701	0.00840442	0.00783055	0	0.00527065	0	0	0	0	0.004998	0	0.00334493	0.00838153	0	0	0	0	0	0	0.00309885	0	0	0.00259215	0	0.0039763	0	0	0	0	0	0	0	0	0.00323761	0.00610109	0.00344531	0	0.00527037	0	0.00367323	0	0
Dyella	0.00671659	0	0.00436986	0.0066072	0	0.00279861	0.00306673	0.00781403	0.00420221	0.00391527	0	0	0	0.00567634	0	0.0128838	0.004998	0.00291239	0.00668986	0.00419076	0	0	0.00839067	0.0188052	0	0.0109842	0.00309885	0.00306204	0.00579374	0	0	0	0	0.00826993	0	0	0	0	0.00409702	0.0116757	0.00971282	0.0183033	0.00344531	0.00343749	0	0	0.00734646	0.00344828	0.0073488
Ea92virus	0	0	0	0	0	0	0	0	0	0	0	0	0	0	0	0	0	0	0	0	0	0	0	0	0	0	0	0	0	0	0	0	0	0	0	0	0	0	0	0	0	0	0	0	0	0	0	0	0
Echinicola	0	0	0	0	0	0	0	0	0	0	0	0	0	0	0.00811754	0	0	0.00291239	0.00334493	0	0	0	0	0	0	0	0	0	0	0	0.00385193	0.0039763	0	0	0	0	0	0	0	0.00233514	0	0	0	0	0	0	0	0	0
Ectothiorhodospira	0	0	0	0.0099108	0	0	0.00306673	0	0	0.00391527	0	0	0	0.00567634	0.00405877	0	0	0.00291239	0	0	0	0.00247568	0.00839067	0.00313421	0	0	0.00309885	0.00306204	0.00289687	0.00259215	0	0	0.00613459	0	0	0.004703	0	0.00953653	0	0.00233514	0	0.00610109	0	0.00343749	0	0	0.00734646	0	0.0024496
Edwardsiella	0.0033583	0.00432732	0.0174795	0.0099108	0	0.00559722	0	0.00781403	0.00420221	0.0117458	0.00631552	0.0263532	0.00434461	0.00283817	0.0121763	0.00429461	0.009996	0.00582479	0.00334493	0	0	0	0.00839067	0.00626841	0	0.00549209	0.00309885	0.00306204	0	0.0103686	0.0115558	0.0039763	0	0.0165399	0	0	0.0311042	0.00476826	0	0.00467028	0	0.00610109	0.00344531	0.0240624	0	0.0101153	0	0.0103448	0.0318448
Eggerthella	0.238439	0.627461	0.201014	0.373307	3.96306	3.98522	0.113469	4.15315	0.079842	0.293646	3.50196	8.75455	6.36052	5.65931	0.0730579	0.420872	4.93303	0.224254	2.71943	2.36359	2.48704	0.8244	0.037758	0.0344763	0.740965	0.0768893	0.0402851	0.349072	0.0926999	0.0570273	0.115558	6.15134	3.62554	8.1955	0	0.178714	8.53499	1.70704	0.0409702	0.0583785	1.19468	1.05854	0.0344531	0.0171874	1.34394	0	0.584043	0.0827586	0.0563408
Ehrlichia	0.0033583	0	0	0	0	0	0	0	0	0	0	0	0	0	0	0.00429461	0.009996	0	0	0	0.00582445	0	0	0	0	0	0	0	0	0	0	0	0	0	0.0290529	0	0	0	0	0	0	0	0	0.00343749	0.00527037	0	0	0.00344828	0
Eikenella	0.0033583	0.0259639	0	0.0033036	0.00507434	0	0.00306673	0	0	0.00391527	0.00315776	0	0.00868923	0	0.00405877	0.00858922	0.004998	0.00582479	0.00334493	0	0.00582445	0	0.00419533	0.00313421	0	0	0.00309885	0	0	0	0.00770386	0	0	0.00413496	0	0.004703	0	0.00476826	0	0	0.00647522	0.00305055	0.00689061	0.0240624	0	0	0	0.00689655	0.0048992
Elizabethkingia	0.0033583	0	0	0	0	0.00559722	0	0.00781403	0.00840442	0	0	0.00527065	0.00434461	0.00283817	0	0.00429461	0	0	0	0.00838153	0.00582445	0	0	0.00626841	0.00378043	0.00549209	0.00619771	0.00306204	0.00289687	0.0051843	0.00770386	0.0039763	0.00613459	0.0124049	0	0	0	0	0	0.00467028	0	0.00305055	0.00344531	0	0.0105407	0	0	0.00344828	0
Elusimicrobium	0	0	0	0	0	0	0	0	0	0	0	0	0	0	0	0	0	0	0.00334493	0	0	0	0	0	0	0	0	0	0.00289687	0	0.00385193	0	0	0	0	0	0	0	0	0	0	0	0	0	0	0	0	0	0.0024496
Endomicrobium	0	0.00432732	0	0.0033036	0	0	0.00306673	0	0	0	0	0	0	0.00567634	0.00405877	0	0	0.00291239	0.00334493	0	0	0	0	0.00313421	0	0	0	0.00612407	0	0	0	0	0	0	0	0	0	0.00476826	0	0	0.00323761	0	0	0	0	0	0	0	0
Endozoicomonas	0	0	0	0.0033036	0.00507434	0	0.00306673	0.00390701	0.00420221	0.00391527	0.00315776	0	0	0.00283817	0.0121763	0	0.004998	0.00291239	0.00334493	0	0	0	0.00419533	0.00313421	0	0.00549209	0.00309885	0	0.00289687	0	0	0.0039763	0	0.00413496	0	0.004703	0.00622084	0.00476826	0.00409702	0.00233514	0.00323761	0.00305055	0	0.00343749	0.00527037	0	0	0	0.0048992
Ensifer	0.0033583	0	0.00436986	0.0099108	0.0101487	0	0.00306673	0.00390701	0	0.00391527	0	0	0	0	0.00405877	0.00429461	0.014994	0.00873718	0.00668986	0.00419076	0.00582445	0	0.00839067	0	0	0.0109842	0	0.00612407	0	0.0051843	0.00385193	0.0039763	0	0.00413496	0	0	0	0.00953653	0.0122911	0.00233514	0.00323761	0.00305055	0	0.00343749	0.0105407	0	0.00367323	0	0.0195968
Enterobacter	0.033583	0.012982	0.0218493	0.016518	0.0608921	0.0223889	0.613346	5.04005	0.0546287	0.0195764	0.0221043	0.453276	0.0477908	0.0255435	0.0121763	2.55959	0.039984	0.0320363	0.0167246	0.0167631	0.0465956	2.79751	0.0335627	0.0313421	0.00756086	0.0713972	0.0123954	8.06541	7.12051	0.152937	1.08624	0.039763	0.0122692	1.62091	0	0.0470301	0.379471	0.0333778	0.0163881	0.207827	0.0323761	0.0305055	0.0137812	0.800935	0.0210815	0.0809225	0.0220394	0.624138	3.3633
Enterococcus	0.100749	0.0649098	0.227233	0.105715	0.294312	0.0979514	1.47816	0.156281	0.239526	0.187933	0.214728	0.0843304	6.70374	0.181643	0.478935	0.11166	0.219912	0.160182	0.190661	0.071243	0.151436	0.903622	0.117469	0.604902	0.291093	0.186731	0.164239	0.63078	0.249131	0.0751724	0.173337	0.393654	0.0981535	0.152994	47.6467	0.174011	4.49145	0.181194	0.340052	0.0910704	0.103603	0.143376	0.127476	2.62624	0.0790556	2.32652	0.0697914	0.110345	0.137178
Epsilon15virus	0	0	0	0	0	0	0	0	0	0	0	0	0	0	0	0	0	0	0	0	0	0	0	0	0	0	0	0	0	0	0	0	0	0	0	0	0	0	0	0	0	0	0	0	0	0	0	0	0
Erwinia	0.0033583	0	0.00436986	0.0066072	0.00507434	0.00559722	0	0.00781403	0	0	0.00315776	0	0	0.00283817	0.00405877	0.00858922	0	0	0	0.0125723	0.00582445	0.00247568	0.00419533	0	0.00378043	0.0164763	0.00309885	0	0.0115875	0.00259215	0.00385193	0.0119289	0	0.00826993	0	0.00940601	0.00622084	0	0	0	0	0.00610109	0.00344531	0.00343749	0	0.0101153	0	0.00344828	0.0073488
Erysipelatoclostridium	0	0	0	0	0	0	0	0.00390701	0	0	0	0	0.00434461	0	0	0	0	0	0	0	0	0	0	0	0	0	0.00309885	0	0	0	0	0	0	0	0	0	0	0	0	0	0	0	0	0.00687498	0	0	0	0	0
Erysipelothrix	0.0134332	0.00432732	0.0131096	0.0033036	0	0.00839584	0	0.0156281	0.00420221	0.00391527	0.00947328	0.00527065	0.00434461	0.00283817	0	0.00429461	0.009996	0	0.0702435	0.00419076	0.00582445	0.00495135	0.00419533	0.00313421	0.00378043	0.0109842	0.00929656	0	0.00869061	0.00777645	0.00770386	0.0119289	0.00613459	0.00826993	0	0.00940601	0.00622084	0	0.00409702	0.00467028	0.00323761	0.00610109	0.00344531	0.00343749	0	0	0.0110197	0	0.0024496
Erythrobacter	0.00671659	0	0.00436986	0.0099108	0	0.00559722	0.0092002	0.00781403	0.0168088	0.0156611	0.00315776	0.0105413	0	0	0.0121763	0	0	0	0.00334493	0.00838153	0	0.00495135	0.00419533	0	0	0.00549209	0.0123954	0.00306204	0.0144844	0.00777645	0.00385193	0.0079526	0	0.00826993	0	0.00940601	0.00622084	0.00476826	0.00409702	0.00467028	0	0.00305055	0.00689061	0	0.00527037	0	0.00734646	0.00689655	0.0024496
Escherichia	0.0134332	0.324549	0.0131096	0	2.46613	0.00279861	0.0337341	0.0312561	0.302559	0.234916	0.0157888	0.200285	13.6421	0.00283817	0.227291	0	1.37945	0.200955	3.51887	0.305926	0.0232978	0.237665	0.394361	0	1.45169	0.0384446	0.00619771	1.18501	0.651796	0.033698	6.15924	7.8691	0.398749	6.69864	0	1.21338	0.248834	0.00476826	0.00819404	0.0723893	0.0226633	0.00305055	1.92937	0.106562	0.0316222	0.869917	0	0.0172414	0.0808368
Ethanoligenens	0.0268664	0.00432732	0.113617	0.0627684	0.00507434	0.0335833	0.0214671	0.0234421	0.0714376	0.0626444	0.0757863	0.0105413	0.00434461	0.0198672	0.0446465	0.0214731	0.034986	0.0553355	0.0602087	0.0419076	0.0291223	0.0123784	0.0545394	0.0344763	0.0113413	0.0659051	0.0402851	0.0153102	0.0550406	0.0362901	0.0385193	0.0914549	0	0.0289448	0	0.032921	0.0311042	0.0238413	0.0614553	0.0420325	0.00647522	0.0366066	0.0482343	0.0240624	0	0.0101153	0.0404055	0.0551724	0.0636896
Eubacterium	7.39497	0.276948	8.0624	7.83944	4.05947	8.28949	4.02969	1.41825	13.6614	1.93023	5.25452	1.64444	0.251988	10.1919	4.9517	9.98067	4.72811	7.34797	10.4128	3.8094	3.54709	2.58956	6.35593	9.86335	5.86723	3.97078	5.72668	4.63899	9.5365	4.63477	5.04218	5.99626	0.785228	8.12934	0	7.93867	0.609642	5.88404	7.9646	6.78825	1.33713	7.07117	4.24462	2.05562	2.85654	0.414728	3.75037	6.98966	3.81158
Exiguobacterium	0.00671659	0	0	0	0	0	0	0.00390701	0.00840442	0.00391527	0	0.00527065	0	0	0	0.00858922	0.004998	0.00291239	0.00334493	0	0.00582445	0.00495135	0.00419533	0.00313421	0	0.00549209	0	0.00306204	0.00289687	0.0051843	0	0.0039763	0	0	0	0.014109	0.0124417	0.00953653	0	0.00233514	0.00323761	0.00305055	0	0.00343749	0	0	0	0.00344828	0.0048992
Ezakiella	0	0.00432732	0.135466	0.0033036	0	0.0531736	0	0	0.00420221	0	0	0	0	0	0.00405877	0.00429461	0	0	0	0.00838153	0	0.00247568	0	0	0	0	0	0.00306204	0	0.00259215	0	0	0	0.00826993	0	0	0	0	0	0.00467028	0	0	0	0.00343749	0.00527037	0.252883	0	0	0.0073488
Faecalibaculum	0.0436579	0.00432732	0.0218493	0.0231252	0.00507434	0.0167917	0.0122669	0.011721	0.0210111	0.0117458	0.0157888	0	0	0.0141908	0.0121763	0.0214731	0.02499	0.00582479	0.0167246	0	0.0116489	0	0.012586	0.015671	0.00378043	0.0274605	0.00929656	0.00918611	0.0347625	0.0129608	0.00770386	0	0.00613459	0	0	0.018812	0.0186625	0.0190731	0.0368732	0.016346	0.00971282	0.0305055	0.00344531	0.00343749	0.00527037	0	0.00367323	0.0241379	0.0318448
Faecalitalea	0.322396	0.0476005	0.436987	0.208127	0.274014	0.162319	0.220805	0.402422	0.411817	0.434595	0.388405	0.289886	0.104271	0.289493	0.710285	0.249087	0.409836	1.24068	0.311078	0.431649	0.349467	0.116357	0.482464	3.16555	0.272191	0.461336	0.334676	0.202094	0.463499	0.251439	0.346674	0.560658	0.0552113	0.458981	0	0.319804	0.174184	0.448217	0.344149	0.224173	0.278434	0.192184	0.296296	0.226874	0.416359	0.0303459	0.198354	0.293103	0.338045
Felixo1virus	0	0	0	0	0	0	0	0	0	0	0	0	0	0	0	0	0	0	0	0	0	0	0	0	0	0	0	0.00306204	0	0	0	0	0	0	0	0	0	0	0	0	0	0	0	0	0	0	0	0	0
Fermentimonas	0.0033583	0	0	0.0099108	0	0	0	0.00781403	0	0.00391527	0	0	0	0	0.0121763	0	0.004998	0.00291239	0.00334493	0.00838153	0.00582445	0.00247568	0.00419533	0.00313421	0.00378043	0	0.0185931	0.00612407	0.00289687	0.00259215	0.00385193	0.0039763	0	0.00413496	0	0	0	0	0.00819404	0.00233514	0	0.00305055	0.00689061	0	0.00527037	0	0	0.00344828	0.0073488
Ferrimonas	0.0033583	0.00432732	0.00436986	0	0.00507434	0.00279861	0.00306673	0	0	0	0	0	0	0	0	0	0	0	0	0.00838153	0	0	0	0	0	0	0.00309885	0	0	0.00259215	0	0	0	0	0	0	0	0	0	0.00233514	0	0.00305055	0	0	0	0	0.00367323	0	0
Fervidobacterium	0.0033583	0	0	0	0	0	0	0.00390701	0.00420221	0	0	0	0	0	0	0	0.004998	0	0	0	0	0	0	0	0	0	0.00619771	0	0	0	0.00385193	0	0.00613459	0	0	0	0	0.00476826	0	0.00233514	0	0.00305055	0.00344531	0.00343749	0	0.0101153	0.00367323	0.00344828	0
Fibrella	0.0033583	0	0.00436986	0	0.00507434	0.00279861	0.00306673	0.00781403	0.00840442	0.00391527	0.00315776	0	0	0.00283817	0.00405877	0.00858922	0.004998	0.00582479	0	0.00419076	0	0	0.00419533	0.0188052	0.00378043	0.00549209	0.00929656	0	0.00289687	0.00259215	0	0	0	0	0	0	0	0.00476826	0.00819404	0.00700542	0.00971282	0.00610109	0	0	0.0105407	0	0.00367323	0.00689655	0.0024496
Fibrobacter	0.00671659	0	0	0	0	0	0	0.00390701	0.00840442	0.00391527	0.00631552	0	0	0	0	0.00429461	0.004998	0.00291239	0	0.00419076	0.0116489	0.00247568	0	0.00313421	0.00378043	0.00549209	0.00619771	0.00306204	0.0144844	0	0	0	0	0	0	0.004703	0	0	0.00409702	0	0	0.00305055	0	0	0	0	0.00367323	0.00344828	0.0073488
Fictibacillus	0	0	0	0.0033036	0	0	0	0.00781403	0	0	0	0	0	0	0	0.00429461	0.004998	0	0	0	0	0	0.00419533	0.00313421	0	0.00549209	0.00309885	0	0.00869061	0.00259215	0.00385193	0	0	0	0	0	0	0	0	0	0.00323761	0.00305055	0	0	0	0	0	0	0
Filifactor	0.0100749	0.00432732	0.0131096	0.0066072	0.0101487	0.00839584	0	0.00781403	0.0168088	0.00783055	0.00631552	0.00527065	0.0217231	0.034058	0	0.0386515	0.004998	0.00873718	0.0200696	0.00419076	0.0232978	0	0.00419533	0	0.00756086	0.0109842	0.00929656	0.00306204	0.00869061	0.00777645	0	0.0039763	0.030673	0.00826993	0	0.014109	0.00622084	0.0190731	0.00409702	0.00233514	0	0.0213538	0.00344531	0.00687498	0.0263518	0.0101153	0.00734646	0	0.0048992
Filimonas	0	0	0	0	0.00507434	0	0	0.00390701	0.00420221	0	0	0	0	0	0	0	0	0	0	0	0	0.00495135	0	0	0	0	0	0	0.00289687	0	0	0	0	0	0	0	0.00622084	0	0	0	0.00323761	0.00305055	0	0	0	0	0	0	0.0024496
Filomicrobium	0	0	0	0	0	0	0	0	0	0	0	0	0	0	0	0	0	0	0	0	0	0	0.00419533	0	0	0	0	0	0	0	0	0	0	0	0	0	0	0	0	0	0	0	0	0	0	0	0	0	0
Fimbriimonas	0	0	0.00436986	0	0	0.00279861	0	0.00390701	0.00840442	0	0	0	0	0	0	0	0	0	0.00334493	0.00419076	0	0	0	0	0	0	0	0	0	0.0051843	0	0	0	0	0	0	0	0	0	0	0	0.00305055	0	0	0	0	0.00367323	0.00344828	0.0048992
Finegoldia	0.0134332	0	4.03339	0.0198216	0.0253717	0.0167917	0.0306673	0.0195351	0.0252133	0.043068	0.00631552	0.0105413	0.0260677	0.0141908	0.0162351	0.0300623	0.034986	0.0232992	0.0133797	0.00419076	0.0116489	0.00247568	0.0293673	0.0282079	0.0226826	0.0274605	0.00929656	0.0122481	0.0144844	0.0129608	0.0269635	0.0159052	0.0122692	0.0165399	0	0.042327	0.0124417	0.0667557	0.0163881	0.0140108	0.0226633	0.0183033	0.0172265	0.01375	0.0263518	7.06049	0	0.0103448	0.0293952
Fischerella	0.0033583	0	0.00436986	0	0	0	0	0	0	0	0.00947328	0	0	0	0	0	0	0	0.00668986	0	0	0	0	0.00626841	0	0.00549209	0	0.00306204	0	0	0	0.0039763	0	0	0	0	0	0	0	0	0	0	0	0	0	0	0	0	0
Flammeovirga	0	0	0	0	0	0	0	0	0.00420221	0	0	0	0	0.00283817	0	0.00429461	0	0	0	0	0	0	0	0	0	0	0	0	0	0	0	0	0	0.00413496	0	0	0	0	0.00409702	0	0	0	0	0	0.00527037	0	0	0	0.0024496
Flavisolibacter	0.0033583	0	0	0	0	0.00279861	0.00306673	0.00390701	0.00420221	0	0	0	0	0	0	0	0	0	0	0	0	0	0.00419533	0.00313421	0	0.00549209	0	0	0	0	0	0	0	0	0	0.004703	0	0	0	0	0	0	0	0	0	0	0	0	0
Flavobacterium	0.0033583	0.00432732	0	0.0033036	0.0101487	0.00559722	0.00306673	0.00390701	0.00840442	0	0.00631552	0	0.00434461	0.00283817	0.00405877	0.00858922	0.014994	0	0.00334493	0.00419076	0	0.00495135	0.00839067	0.00313421	0	0.0274605	0.00619771	0.00918611	0.00579374	0.00777645	0.00385193	0.0159052	0.00613459	0	0	0.00940601	0	0	0.00819404	0.00700542	0.00323761	0.00305055	0.00344531	0	0.00527037	0	0.00367323	0.00344828	0
Flavonifractor	4.02996	1.49292	3.98969	5.03799	0.167453	0.934736	3.09127	0.871264	0.777409	2.67805	4.32298	9.37648	7.2642	5.086	2.44744	8.688	0.479808	1.4795	1.67915	2.9964	0.95521	4.67408	0.562175	1.90873	1.02072	0.329525	1.3542	0.352134	0.527231	3.51496	4.24868	3.38781	0.22698	6.99223	0	0.239853	2.2395	10.3614	0.610456	5.7818	1.02308	4.35008	0.45478	0.65656	0.1423	0.0809225	8.1913	3.52759	0.583005
Flexistipes	0	0	0	0	0	0	0	0	0	0	0	0	0	0	0	0	0	0	0	0	0	0	0	0	0	0	0	0	0.00579374	0	0	0	0	0	0	0	0	0	0	0	0	0	0	0	0	0	0	0	0
Fluoribacter	0	0	0	0	0	0	0	0	0	0	0	0	0	0	0	0	0	0	0	0	0	0	0	0	0	0	0	0	0	0	0	0	0	0	0	0	0	0	0.00409702	0	0	0	0	0	0	0	0	0	0
Fluviicola	0	0	0.00436986	0	0	0	0	0	0.00840442	0.00391527	0	0	0	0	0.00811754	0	0	0.00291239	0	0	0	0.00247568	0	0.00313421	0.00378043	0	0	0.00306204	0.00289687	0.00259215	0	0	0.00613459	0	0	0	0	0	0	0	0	0	0	0	0.0105407	0	0	0	0
Formosa	0	0	0	0	0	0	0	0	0	0	0.00315776	0	0	0	0.00405877	0	0	0.00291239	0.00334493	0.00419076	0	0	0	0	0	0	0	0	0	0	0.00385193	0	0	0.00413496	0	0	0	0	0	0	0	0	0	0	0	0	0	0.00344828	0.0048992
Francisella	0.0033583	0	0.00436986	0.0033036	0	0.00559722	0.00306673	0	0.00420221	0.00391527	0	0.00527065	0	0	0.00405877	0.0128838	0.014994	0.00582479	0.00668986	0.0125723	0.00582445	0	0.00839067	0.00626841	0	0.00549209	0.00619771	0.00612407	0	0.0051843	0.00385193	0	0.0122692	0.00826993	0	0.004703	0	0.00476826	0.00819404	0.00233514	0.00323761	0.00305055	0	0	0.0158111	0	0	0.0103448	0.0024496
Frankia	0.0033583	0	0.0131096	0	0.00507434	0.00279861	0.00306673	0	0.0168088	0.00391527	0.00315776	0.00527065	0	0.00283817	0	0.00858922	0.004998	0	0	0.00419076	0	0	0	0.00313421	0	0	0.00619771	0	0.0115875	0.0051843	0.00385193	0.0079526	0	0.00826993	0	0.00940601	0.00622084	0.00476826	0.00409702	0.00467028	0	0.00610109	0.00344531	0.00687498	0	0	0	0.00689655	0.0048992
Frateuria	0.0033583	0	0	0	0	0.00279861	0.00306673	0.00781403	0	0.00391527	0	0	0	0.00283817	0.00811754	0.00429461	0	0	0	0.00419076	0.00582445	0.00247568	0.00419533	0	0	0.00549209	0	0	0	0.0051843	0	0	0	0.00413496	0	0.004703	0	0	0.00409702	0	0	0.00305055	0	0	0.00527037	0	0	0	0.0048992
Friedmanniella	0	0	0.00873973	0.0066072	0	0.00279861	0.00306673	0.00390701	0	0.00391527	0.00315776	0	0	0	0	0	0	0.00291239	0	0	0.00582445	0	0	0	0	0	0.00309885	0	0	0.0051843	0	0	0	0	0	0	0	0.00476826	0	0	0	0.00610109	0.00689061	0	0.00527037	0	0	0	0
Frischella	0.0033583	0	0	0	0	0	0	0	0	0.00391527	0	0	0	0	0	0.00429461	0	0	0	0	0	0	0	0	0	0	0	0	0	0.0051843	0.00385193	0	0	0	0	0	0	0	0.00409702	0	0	0	0.00344531	0.00343749	0	0	0	0	0
Frondihabitans	0	0	0.00436986	0	0	0	0.00306673	0.00781403	0.00420221	0.00391527	0	0	0	0	0	0	0	0	0	0	0.00582445	0	0.00419533	0.00313421	0	0.00549209	0	0.00306204	0.00289687	0	0.00385193	0	0	0	0	0.004703	0	0	0.00409702	0.00233514	0	0.00305055	0.00344531	0	0	0	0	0	0
Fuerstia	0.0033583	0	0	0	0	0	0	0	0	0	0	0.00527065	0	0.00283817	0.00405877	0	0.004998	0	0	0	0	0	0	0	0	0	0.00309885	0	0	0	0	0	0.00613459	0	0	0.004703	0	0.00476826	0	0	0	0.00305055	0	0	0.00527037	0	0	0	0
Fusobacterium	0.0134332	0.298585	0.0131096	0.0066072	7.61151	0.58491	0.0092002	0.730611	0.0252133	0	0.00315776	2.51937	0.00434461	0.0085145	0	0.0214731	0.07497	0.00873718	0.0100348	5.79164	0.0931912	0.00742703	0.0461487	0.0125368	0.0151217	0.0164763	0.0123954	0.0275583	0.00869061	0.0311058	4.09846	0.0039763	1.92626	0.0413497	0	0.032921	0.0186625	0.0429144	0.31547	0.312909	0.210445	0.00610109	0.0516796	0.955622	0.0474333	0.0606919	0.359976	0	0.0171472
G7cvirus	0	0	0	0	0	0	0	0	0	0	0	0	0	0	0	0	0	0	0	0	0	0	0	0	0	0	0	0	0	0	0	0	0	0	0	0	0	0	0	0	0	0	0	0	0	0.0101153	0	0	0
Gallibacterium	0	0.00865464	0	0	0	0	0.00306673	0	0.00420221	0	0	0	0	0	0.00405877	0.00429461	0	0.00291239	0.00334493	0	0	0	0.00419533	0.00313421	0	0.00549209	0.00309885	0	0.00289687	0	0	0	0	0	0	0.004703	0	0	0	0.00233514	0.00323761	0.00305055	0.00344531	0	0	0	0.00367323	0	0
Gallionella	0.00671659	0	0.00436986	0	0	0.00279861	0	0.00781403	0	0	0.00315776	0	0	0.00283817	0.00405877	0	0	0	0	0.00419076	0	0.00247568	0	0.00313421	0	0.00549209	0.00309885	0	0	0	0	0	0	0	0	0	0	0.00476826	0.00409702	0	0	0.00305055	0	0.00687498	0	0	0.00367323	0	0
Gammapapillomavirus	0	0	0	0	0	0	0	0	0	0	0	0	0	0	0	0	0	0	0	0	0	0	0	0	0	0	0	0	0	0	0	0	0	0	0	0	0	0	0	0	0	0	0	0	0	0	0	0	0
Gardnerella	0.0033583	0	0	0	0	0	0	0	0	0	0	0	0	0	0	0	0.004998	0	0	0.00419076	0	0	0	0	0	0	0	0	0.00289687	0	0	0	0	0	0	0.004703	0	0	0	0	0	0	0	0.00343749	0	0	0	0	0
Geitlerinema	0.0033583	0	0	0.0033036	0	0	0	0	0.00420221	0.00391527	0.00315776	0	0	0	0	0.00429461	0.004998	0	0	0	0	0	0	0	0	0	0	0.00306204	0	0	0	0.0039763	0	0	0	0	0	0	0.00409702	0	0	0	0	0	0.00527037	0	0	0	0.0024496
Gemella	0	0	0	0.0462504	0.00507434	0.00559722	0.00306673	0	0.0126066	0.00391527	0.00631552	0.0527065	0.00434461	0.00567634	0.00405877	0	0.004998	0.00291239	0.00334493	0.00419076	0	0	0	0	0	0.00549209	0.00309885	0	0.00289687	0.00259215	0.00770386	0.0079526	0.00613459	0.00826993	0	0.00940601	0.00622084	0.00476826	0.00409702	0.00233514	0.0129504	0	0	0.00687498	0.0105407	0.0202306	0.00367323	0.00344828	0.0073488
Geminocystis	0.00671659	0	0.00436986	0	0.00507434	0.00279861	0	0.00390701	0.00420221	0	0.00631552	0.0105413	0	0	0	0.00858922	0.014994	0.00291239	0.00334493	0	0	0.00247568	0	0.00626841	0	0.0164763	0	0.00612407	0.00869061	0	0	0	0	0.00826993	0	0.00940601	0	0.00476826	0.00409702	0	0.00323761	0.00610109	0.00344531	0.00343749	0.0105407	0	0.00367323	0	0
Gemmata	0.0033583	0	0	0	0	0	0.00306673	0	0	0	0	0	0	0	0	0.00429461	0	0	0.00334493	0	0	0	0	0	0	0	0	0	0	0	0	0	0	0	0	0	0	0	0	0	0.00323761	0.00305055	0.00344531	0	0	0	0	0.00344828	0
Gemmatimonas	0	0	0.00436986	0.0033036	0	0	0	0	0.0126066	0	0.00947328	0	0	0.00567634	0	0	0	0.00291239	0	0	0	0.00247568	0	0.00313421	0.00378043	0	0.00309885	0.00306204	0	0.00259215	0.00385193	0.0039763	0	0	0	0.00940601	0	0	0	0.00467028	0	0.00305055	0	0	0	0	0	0	0.0048992
Geoalkalibacter	0	0	0.0131096	0	0	0	0	0	0.00420221	0.00391527	0.00315776	0	0	0	0	0	0.004998	0.00582479	0.00334493	0.00838153	0	0.00247568	0	0.00940262	0	0	0.00619771	0	0.00869061	0	0	0	0.00613459	0	0	0.004703	0.0124417	0	0	0	0.00323761	0.00305055	0	0	0	0	0	0.00344828	0
Geobacillus	0.0033583	0.00432732	0.00873973	0.0033036	0	0.0139931	0.00613346	0.00781403	0.0168088	0.00783055	0.012631	0.00527065	0.00868923	0.00567634	0.00405877	0.00429461	0.004998	0.00873718	0.0133797	0.00419076	0.0174734	0	0.012586	0.00626841	0.00378043	0.00549209	0.0185931	0.00918611	0.0115875	0.00777645	0.0154077	0.0079526	0	0.00413496	0	0.00940601	0.00622084	0.00953653	0.0122911	0.00934056	0.00647522	0.00305055	0.00689061	0.00343749	0.00527037	0	0.00734646	0.0172414	0.0048992
Geobacter	0.0167915	0	0.0218493	0.033036	0.0101487	0.0167917	0.0306673	0.0351631	0.0378199	0.0352375	0.0505242	0.00527065	0.00434461	0.0085145	0.0243526	0.0171784	0.039984	0.0436859	0.0301044	0.00838153	0.0232978	0.00742703	0.0293673	0.0250737	0.00756086	0.0659051	0.0123954	0.00918611	0.0202781	0.0362901	0.0192597	0.0636208	0.030673	0.0124049	0	0.014109	0.037325	0.0333778	0.0532612	0.0210163	0.0259009	0.0427077	0.0206718	0.0274999	0.0263518	0.0101153	0.0183661	0.0172414	0.0440928
Geodermatophilus	0	0	0.00873973	0	0	0	0	0	0.00420221	0.00391527	0.00315776	0	0	0	0	0.00858922	0	0	0.00334493	0.00419076	0	0	0	0	0	0	0	0	0.00289687	0	0	0	0.00613459	0	0	0.004703	0.00622084	0	0.00409702	0.00233514	0	0.00610109	0	0	0	0	0.00367323	0	0
Geoglobus	0	0	0	0	0	0	0	0	0	0	0	0	0	0	0	0	0	0	0	0	0	0	0	0	0	0	0	0	0	0	0	0	0	0	0	0	0	0	0	0	0	0	0	0	0	0	0	0	0
Geosporobacter	0.0033583	0	0.00436986	0.0033036	0.00507434	0.00559722	0.00306673	0.011721	0.00840442	0.00783055	0	0.0158119	0.00868923	0.00283817	0.0202939	0.00429461	0.004998	0.00291239	0.0133797	0	0.0174734	0.00247568	0.00839067	0	0.00378043	0	0.00929656	0	0.00579374	0.0051843	0	0.0079526	0	0.00413496	0	0	0.00622084	0	0.00409702	0.00233514	0.016188	0	0.00344531	0.01375	0	0	0.00734646	0.00344828	0.0073488
Gibbsiella	0	0	0	0	0	0	0.0184004	0	0.00420221	0	0	0	0	0	0	0	0	0	0	0	0.00582445	0	0	0	0	0	0	0	0	0	0	0	0	0	0	0	0.00622084	0	0	0	0	0	0	0.01375	0	0	0	0	0
Gilliamella	0	0	0	0	0	0.00279861	0	0.00390701	0.00420221	0	0	0	0	0	0.00405877	0	0	0	0	0	0	0	0	0	0	0.00549209	0	0.00306204	0	0	0	0	0	0	0	0.004703	0.00622084	0.00476826	0	0.00233514	0	0	0	0	0	0	0	0	0
Gillisia	0	0.00432732	0	0	0.00507434	0	0	0	0	0	0	0	0	0	0	0	0	0	0	0	0.00582445	0	0	0.00313421	0	0	0.00309885	0	0	0	0	0	0	0	0	0	0	0	0	0.00233514	0	0	0	0	0	0	0	0.00344828	0.0024496
Gilvibacter	0	0	0	0	0	0	0	0	0	0	0	0	0	0	0	0	0	0	0	0	0	0	0	0	0	0	0	0	0	0	0	0.0039763	0	0	0	0	0	0	0	0	0	0	0	0	0.00527037	0	0	0	0
Glaciecola	0.0033583	0	0	0	0	0	0	0	0	0	0.00631552	0	0	0	0.00405877	0	0	0	0	0	0	0	0	0	0	0	0	0	0	0.00259215	0	0	0	0	0.0290529	0	0.00622084	0	0	0.00233514	0	0	0.00344531	0	0	0	0	0	0
Gloeobacter	0	0	0.0131096	0.0066072	0	0.00839584	0.00306673	0.00781403	0	0.0117458	0.00947328	0	0.00434461	0	0.0202939	0	0.009996	0.00291239	0.00668986	0.00419076	0.00582445	0	0.00419533	0.00940262	0	0.0164763	0.00619771	0	0.00869061	0	0	0.0039763	0	0.00413496	0	0	0.0124417	0.00953653	0.0122911	0.00700542	0.00647522	0.0152527	0	0.00343749	0.0105407	0	0.0110197	0.00689655	0.0048992
Gloeocapsa	0	0	0	0	0	0	0	0	0	0	0	0	0	0	0	0	0	0	0	0	0	0	0	0	0	0	0	0	0	0	0	0	0	0	0	0	0	0	0	0	0	0	0	0	0	0	0	0	0
Gloeomargarita	0	0	0	0.0033036	0	0	0	0	0.00420221	0	0	0	0	0	0	0	0	0	0	0	0	0.00247568	0	0	0	0.00549209	0	0	0	0	0	0	0	0	0	0.004703	0	0	0	0	0	0	0	0.00343749	0	0	0	0	0
Gluconacetobacter	0	0	0	0	0	0	0	0.00390701	0	0	0	0	0	0	0	0	0.004998	0.00582479	0	0	0	0	0.00419533	0	0	0.00549209	0.00309885	0.00306204	0.00289687	0	0	0	0	0	0	0	0	0	0	0.00233514	0	0	0	0	0	0	0	0.00689655	0.0024496
Gluconobacter	0	0	0	0.0033036	0	0.00559722	0.00306673	0.00390701	0.00420221	0.00391527	0.00631552	0.0105413	0.00434461	0	0	0	0.004998	0	0	0.00838153	0	0	0	0.00313421	0.00378043	0	0	0	0.00869061	0	0	0	0	0.00826993	0	0	0.00622084	0.00476826	0	0	0.00323761	0	0	0.00687498	0.00527037	0	0.00734646	0	0.0024496
Glutamicibacter	0	0	0	0	0	0	0	0	0.00840442	0.00783055	0.00315776	0	0	0	0.00405877	0	0	0	0	0	0	0.00247568	0	0	0.00378043	0	0	0	0	0	0	0.0039763	0	0.00413496	0	0	0	0	0	0.00233514	0	0	0	0.00343749	0	0	0	0	0.0048992
Gordonia	0	0	0	0	0	0.00559722	0.00306673	0	0.00840442	0.00391527	0	0	0	0	0.00405877	0.0128838	0	0.00291239	0.00668986	0.00419076	0.0174734	0.00247568	0.00419533	0.00626841	0	0.0109842	0	0	0.00869061	0.0051843	0.00385193	0.0079526	0.0122692	0.00413496	0	0.004703	0	0.0143048	0.0122911	0.00467028	0.0129504	0.00915164	0.00689061	0	0.00527037	0	0.00734646	0	0.0048992
Gordonibacter	0.114182	0.00432732	0.144206	0.175091	0.131933	0.128736	0.0521344	0.18363	0.273144	0.211425	0.164204	0.274074	0.125994	0.0908214	0.150175	0.146017	0.169932	0.215517	0.2308	0.10896	0.192207	0.0297081	0.0964927	0.075221	0.185241	0.411907	0.105361	0.0306204	0.168019	0.114055	0.2003	0.238578	0.233115	0.161264	0	0.507925	0.534992	0.185962	0.176172	0.0864001	0.158643	0.33251	0.130922	0.0171874	0.210815	0.0202306	0.209374	0.162069	0.12003
Gottschalkia	0.0033583	0	0	0.0033036	0	0.0139931	0	0	0.00420221	0.00391527	0	0	0	0	0	0.00858922	0.029988	0.00291239	0.00334493	0.00419076	0	0	0	0.00313421	0	0.0109842	0.00309885	0	0	0.00777645	0.0269635	0.0079526	0	0.00413496	0	0	0.00622084	0.0190731	0.00409702	0.00934056	0.00971282	0	0.00689061	0.00687498	0	0.0202306	0	0	0.0073488
Gramella	0	0	0.00436986	0	0.0101487	0.00559722	0.00306673	0	0	0.00783055	0.00631552	0.00527065	0	0	0	0.00429461	0	0	0.00334493	0.00838153	0	0.00247568	0	0	0	0	0.00619771	0	0.00289687	0.00259215	0.00385193	0	0	0.00826993	0	0.004703	0	0.00953653	0.00409702	0.00700542	0.00323761	0.00305055	0.00344531	0	0.0105407	0.0101153	0.0146929	0.00689655	0.0024496
Granulibacter	0	0	0	0	0	0	0.00306673	0	0	0.00391527	0	0	0	0	0.00405877	0	0	0.00291239	0	0	0	0	0	0	0	0	0	0.00306204	0	0	0	0.0039763	0	0	0	0	0	0	0	0	0.00323761	0	0	0	0	0	0.00367323	0	0
Granulicella	0.0033583	0	0.00873973	0.0099108	0	0.00279861	0	0	0.00840442	0.00391527	0.00315776	0	0	0.00567634	0.00405877	0.00429461	0.009996	0	0.00334493	0	0	0.00247568	0.00419533	0.00313421	0	0	0.00309885	0	0.00289687	0	0	0.0039763	0	0	0	0	0.0124417	0.00953653	0.0163881	0.00233514	0	0.00305055	0.00344531	0.00343749	0	0	0	0.00344828	0.0097984
Granulosicoccus	0	0	0.00436986	0.0033036	0	0	0	0	0	0	0	0	0	0.00283817	0	0	0	0	0	0	0	0	0	0	0	0	0.00309885	0	0	0	0	0	0	0	0	0	0	0	0.00409702	0	0.00323761	0	0.00344531	0	0	0	0	0	0
Grimontia	0	0	0	0	0	0	0	0	0	0	0	0	0	0.00283817	0	0	0.004998	0.00291239	0	0	0.00582445	0.00247568	0	0.00313421	0	0	0	0	0	0	0	0	0	0.00413496	0	0	0	0	0	0	0	0.00305055	0	0	0	0	0	0	0.0024496
Gynuella	0	0	0	0	0	0	0	0	0	0	0	0	0	0	0	0	0	0.00291239	0	0	0	0.00247568	0.00419533	0.00313421	0	0.0109842	0.00309885	0.00306204	0	0.00259215	0.00385193	0	0	0	0	0	0	0	0	0	0	0.00610109	0	0	0	0	0	0	0
Haematospirillum	0	0	0	0	0	0	0	0	0	0.00391527	0.00315776	0	0	0	0	0	0	0.00291239	0	0	0.00582445	0	0.00419533	0	0	0	0	0.00306204	0	0.00777645	0	0	0	0.00413496	0	0	0	0	0	0	0	0	0	0	0	0	0	0	0
Haemophilus	0.00671659	2.34541	0.00873973	0.0462504	0.142081	0.00279861	0.00306673	0.00781403	0.00840442	0.00783055	0.00631552	0	0	2.31594	0.00405877	0.43805	0.014994	0.00291239	0.00668986	0.00419076	0.0232978	0	0.025172	0.0783552	3.40617	0	2.24667	0.00612407	0.489571	2.80212	0.269635	0	0	5.28449	0.0290529	0.004703	0.00622084	2.95155	0.0532612	0.00233514	2.8491	0.00610109	0.00689061	0.419374	1.07516	0.0708072	0	0	0.127379
Hafnia	0.00671659	0.00432732	0.00436986	0.0033036	0	0.00279861	0.00613346	0.00781403	0.00420221	0	0.00631552	0	0	0	0	0.00858922	0	0	0	0.00838153	0.00582445	0.0346595	0.00839067	0.00313421	0	0.00549209	0.00309885	0.00306204	0	0	0	0.0039763	0	0.00413496	0	0	0.00622084	0	0	0.00467028	0.00647522	0	0	8.2156	0	0	0.00734646	0.00344828	0.389486
Hahella	0.0033583	0	0	0	0	0.00279861	0	0	0	0	0	0	0	0	0	0	0	0	0	0.00419076	0	0	0	0	0	0	0	0	0	0	0	0	0	0	0	0	0.00622084	0	0.00409702	0	0	0.00305055	0	0	0	0	0	0	0
Halalkalicoccus	0	0	0	0	0	0	0	0	0	0	0	0	0	0	0	0	0	0	0	0	0	0	0	0	0	0	0	0	0	0	0	0	0	0	0	0	0	0	0	0.00233514	0	0	0	0	0	0	0	0	0
Halanaeroarchaeum	0	0	0	0	0	0	0	0	0	0	0	0	0	0	0	0	0	0	0	0	0	0	0	0	0	0	0	0	0	0	0	0.0039763	0	0	0	0	0	0	0	0	0	0	0.00344531	0	0	0	0	0	0
Halanaerobium	0.0033583	0	0	0	0.00507434	0.00559722	0.00613346	0	0	0	0.00315776	0	0	0	0	0.00429461	0.009996	0.00291239	0.00334493	0.00419076	0.0116489	0	0	0.00626841	0.00756086	0.0109842	0.00309885	0.00306204	0	0.00259215	0.00385193	0	0	0	0	0.004703	0.00622084	0.0143048	0.0122911	0.00934056	0.00647522	0.00305055	0	0.00343749	0.0105407	0.0101153	0	0.00344828	0.0024496
Haliangium	0	0	0.0131096	0.0033036	0	0	0	0	0	0.00783055	0.00947328	0	0	0	0	0	0	0	0.00334493	0	0	0	0	0	0	0.00549209	0	0	0.00289687	0.00259215	0	0.0039763	0	0	0	0	0	0	0.00409702	0	0	0	0	0	0	0	0	0.00344828	0
Halioglobus	0	0	0	0.0033036	0	0.00279861	0	0	0	0	0.00315776	0	0	0	0.00811754	0.00429461	0	0.00582479	0	0	0	0	0.00419533	0.00626841	0	0.0109842	0	0	0.00289687	0.0051843	0	0	0	0	0	0	0	0.00476826	0.00409702	0.00467028	0.00323761	0.00305055	0	0	0.00527037	0	0	0	0.0024496
Haliscomenobacter	0.00671659	0	0	0	0	0	0	0	0.00420221	0.00391527	0.00315776	0	0	0	0	0.00429461	0	0	0	0	0	0	0	0.00313421	0	0	0.00309885	0	0	0	0	0.0039763	0	0	0	0	0	0	0	0	0	0	0	0	0	0	0	0	0
Haloarcula	0	0	0	0	0	0	0	0	0	0.00391527	0	0	0	0	0	0	0	0.00291239	0	0	0	0	0	0	0	0.00549209	0	0	0	0	0	0	0	0	0	0	0	0.00476826	0	0	0	0	0.00344531	0	0	0	0	0.00344828	0
Halobacillus	0	0	0	0	0	0.00279861	0	0.00390701	0.00420221	0	0	0	0.00434461	0.00283817	0	0.00429461	0.004998	0.00291239	0.00334493	0.00419076	0	0	0.00419533	0	0.00378043	0.0109842	0.00929656	0.00306204	0.00579374	0.00259215	0.00770386	0	0	0	0	0	0	0	0.0122911	0.00467028	0.00323761	0.00305055	0	0	0	0	0.00734646	0.00344828	0.0024496
Halobacteriovorax	0	0	0	0	0	0	0	0	0	0.00391527	0.00315776	0	0	0	0	0	0	0	0	0	0	0	0	0	0	0	0	0	0.00289687	0	0	0	0	0.00413496	0	0	0	0	0	0	0.00323761	0	0	0	0	0	0	0	0.0024496
Halobacterium	0	0	0	0	0	0	0	0	0	0	0	0	0	0	0.00405877	0	0	0	0	0	0	0	0	0	0	0	0	0	0	0	0	0	0	0	0	0	0	0	0	0	0	0	0	0	0	0	0	0	0
Halobacteroides	0	0	0	0.0033036	0	0.00559722	0	0.00390701	0.00420221	0.00391527	0	0.00527065	0.00434461	0.00283817	0	0.00429461	0.009996	0.00582479	0	0.00419076	0	0	0.00419533	0	0.00378043	0	0.00309885	0.00306204	0	0.00259215	0.00385193	0.0039763	0.00613459	0	0	0	0.00622084	0.00476826	0	0	0	0.00305055	0	0	0.00527037	0	0.00367323	0	0.0024496
Halobiforma	0	0	0	0	0	0	0	0	0.00420221	0	0	0	0.00434461	0	0	0	0	0	0	0	0	0	0	0	0	0	0	0	0	0	0	0	0	0	0	0	0	0	0	0.00467028	0	0	0	0	0	0	0.00367323	0	0
Halocynthiibacter	0	0	0	0	0	0	0	0	0	0	0	0	0	0	0	0	0	0.00291239	0	0	0	0	0	0	0	0	0	0	0.00289687	0	0	0	0	0	0	0	0	0	0	0	0	0	0	0	0	0	0	0	0
Halodesulfurarchaeum	0	0	0	0	0	0	0	0	0	0	0	0	0	0	0	0	0	0	0	0	0	0	0	0	0	0	0	0	0	0	0	0	0	0	0	0	0	0	0	0	0	0	0	0	0	0	0	0	0
Haloferax	0	0	0.00436986	0	0	0	0	0	0	0	0	0	0.00434461	0	0	0.00429461	0	0	0	0	0	0	0.00419533	0	0	0	0	0	0	0	0	0	0	0	0	0	0	0	0.00409702	0	0	0.00305055	0	0	0	0	0	0	0
Halogeometricum	0	0	0	0	0	0	0	0	0	0	0	0	0	0	0	0	0	0	0	0	0	0	0	0	0	0	0	0	0	0	0	0	0	0	0	0	0	0	0	0	0	0	0	0	0	0	0	0	0
Halomicrobium	0	0	0	0	0	0	0	0	0	0	0	0	0	0	0	0	0	0	0	0	0	0	0	0	0	0	0	0	0	0	0	0	0	0	0	0	0	0	0	0	0	0	0	0	0	0	0	0	0
Halomicronema	0.00671659	0	0	0	0	0	0	0	0.00420221	0	0.00315776	0	0	0	0	0	0.009996	0	0	0.00419076	0	0	0	0	0	0.00549209	0	0	0.00289687	0.00259215	0	0.0039763	0	0	0	0.00940601	0	0	0.0122911	0.00467028	0	0	0	0	0	0	0	0.00689655	0.0048992
Halomonas	0.00671659	0	0.0262192	0.016518	0.0101487	0.0139931	0.0122669	0.011721	0.0294155	0.0156611	0.00947328	0.0158119	0	0.0113527	0.0162351	0.0171784	0.044982	0.0232992	0.0200696	0.0125723	0.0524201	0.00495135	0.025172	0.0219394	0	0.0384446	0.0340874	0.00612407	0.0202781	0.0051843	0.0115558	0.0119289	0.00613459	0.00413496	0	0.00940601	0.0186625	0.0238413	0.0409702	0.0210163	0.00971282	0.0244044	0.0172265	0.0171874	0.0210815	0	0	0.00689655	0.0318448
Halopenitus	0	0	0	0	0	0	0	0	0	0	0	0	0	0	0	0	0	0	0	0	0	0	0	0	0	0	0	0	0.00289687	0	0	0.0039763	0	0	0	0.004703	0	0	0	0	0	0	0	0	0	0	0	0	0
Halopiger	0	0	0	0	0	0	0	0	0	0	0	0	0	0	0	0	0	0	0	0	0	0	0	0	0	0	0	0	0	0	0	0	0	0	0	0	0	0	0	0	0	0	0	0	0	0	0	0	0
Haloquadratum	0	0	0	0	0	0	0	0	0	0	0	0	0	0	0	0	0	0	0	0	0	0	0	0	0	0	0	0	0	0	0	0	0	0	0.0290529	0	0	0	0	0	0	0	0	0	0	0	0	0	0
Halorhabdus	0	0	0.0174795	0	0	0.00279861	0	0	0.00420221	0	0	0	0	0	0.0121763	0	0.004998	0	0.00334493	0.00419076	0	0	0	0	0	0.00549209	0	0	0.00289687	0	0	0.0079526	0	0	0	0.004703	0	0	0.00819404	0.00233514	0	0.00305055	0	0	0	0	0.00367323	0.00344828	0.0024496
Halorhodospira	0	0	0	0.0033036	0	0	0	0.00390701	0	0.00391527	0.00315776	0	0	0	0.00811754	0	0	0.00291239	0	0	0	0.00247568	0	0	0	0	0.00309885	0.00612407	0.00289687	0.00259215	0.00385193	0.0079526	0	0	0	0	0	0	0.00409702	0.00233514	0.00323761	0	0.00344531	0	0.00527037	0	0	0	0.0024496
Halorientalis	0	0	0	0	0	0	0	0	0	0	0	0	0	0	0	0	0	0	0	0	0	0	0	0	0	0	0	0	0	0	0	0	0	0	0	0	0	0	0	0	0	0	0	0	0.00527037	0	0	0	0
Halorubrum	0	0	0	0	0	0	0	0	0	0.00391527	0.00315776	0	0	0	0	0.00429461	0	0	0	0	0	0	0	0	0	0	0	0	0	0	0	0.0039763	0	0	0	0	0	0	0	0	0	0	0.00344531	0	0	0	0	0	0
Halostagnicola	0	0	0	0	0	0	0	0	0	0	0	0	0	0	0	0	0	0	0	0	0	0	0	0.00313421	0	0	0	0	0.00289687	0	0	0	0	0	0	0	0	0	0	0.00233514	0	0	0	0	0	0	0.00367323	0	0
Halotalea	0.0033583	0	0	0	0	0.00279861	0.00306673	0.00390701	0	0	0	0	0	0	0	0	0	0	0	0	0.00582445	0	0	0	0	0	0	0	0	0	0	0	0	0	0	0.004703	0	0.00476826	0	0.00233514	0	0	0	0	0	0	0.00367323	0	0.0024496
Haloterrigena	0	0	0	0	0	0	0	0	0.00420221	0.00391527	0.00315776	0	0	0	0.00405877	0	0	0	0	0	0	0	0	0	0	0.00549209	0	0	0.00579374	0.00259215	0	0	0	0	0	0	0	0	0	0	0	0	0	0	0	0	0	0	0.0024496
Halothece	0	0	0.00436986	0	0	0	0	0.00390701	0	0	0	0	0	0.00283817	0	0	0	0	0.00668986	0.00419076	0	0	0	0	0.00378043	0	0	0	0.00289687	0	0	0	0	0	0	0.004703	0	0	0	0	0.00323761	0.00305055	0.00344531	0	0	0	0	0.00344828	0
Halothermothrix	0	0	0	0	0	0	0	0	0	0.00391527	0	0	0	0.00283817	0	0	0	0	0	0.00419076	0	0	0	0	0	0	0	0	0	0	0	0	0	0	0	0	0	0	0	0	0	0	0	0	0	0	0.00367323	0	0
Halothiobacillus	0	0	0	0	0	0	0	0	0.00420221	0	0	0	0	0	0.00405877	0.00429461	0	0	0	0	0.00582445	0.00247568	0.00419533	0	0	0	0	0	0	0	0	0.0039763	0	0	0	0	0	0.00476826	0	0	0	0.00305055	0	0.00343749	0	0	0	0	0
Helicobacter	0	0.00432732	0	0	0	0.00559722	0	0.00781403	0.00420221	0.00391527	0	0	0.00434461	0	0.00811754	0	0.004998	0.00291239	0.00334493	0	0	0	0	0	0	0.00549209	0.00309885	0.00306204	0.00289687	0	0.00385193	0.0039763	0	0	0	0.004703	0	0	0.00409702	0.00233514	0	0.00305055	0.00689061	0	0.00527037	0	0	0	0
Heliobacterium	0.0033583	0	0.0174795	0.0066072	0.00507434	0.00279861	0.00613346	0.00781403	0.0168088	0.0156611	0.012631	0	0.00434461	0.0085145	0.0121763	0.0128838	0.019992	0.0116496	0.0234145	0	0.00582445	0.00247568	0.0167813	0.0125368	0.00378043	0.00549209	0.0123954	0.00306204	0.0115875	0.00777645	0.00385193	0.0238578	0.030673	0.00413496	0	0.014109	0.00622084	0.00476826	0.0204851	0.00700542	0.00647522	0.0152527	0.0103359	0.0103125	0.0105407	0.0202306	0	0.0172414	0.0146976
Herbaspirillum	0.0033583	0	0.0131096	0.0033036	0.00507434	0.00559722	0.00613346	0.0195351	0.00840442	0.0195764	0.012631	0.0158119	0	0.00283817	0.00405877	0.00429461	0	0.00582479	0.0100348	0.0125723	0.0174734	0	0.0167813	0.00940262	0.00378043	0.0164763	0.00619771	0.00306204	0.0115875	0.00259215	0.00385193	0.0119289	0	0	0	0	0.0124417	0.0143048	0.00819404	0.0116757	0.00647522	0.0122022	0.00689061	0.00687498	0.00527037	0	0.0183661	0.00344828	0.0097984
Herbinix	0.033583	0.0173093	0.0349589	0.033036	0.00507434	0.0139931	0.0184004	0.0234421	0.0504265	0.00783055	0.0221043	0.0105413	0	0.0141908	0.0121763	0.0257677	0.044982	0.0203868	0.0167246	0.0251446	0.0174734	0.00742703	0.012586	0.0188052	0.0113413	0.0494288	0.021692	0.0183722	0.0202781	0.0259215	0.0308155	0.0159052	0.0184038	0.0372147	0	0.042327	0.0186625	0.0429144	0.0122911	0.016346	0.00647522	0.0244044	0.0172265	0.0343749	0.0105407	0.0202306	0	0.0344828	0.0342944
Herminiimonas	0	0	0.00436986	0	0.00507434	0	0	0.00390701	0	0	0.00315776	0	0.00434461	0	0	0	0	0.00291239	0	0	0.00582445	0	0	0	0.00756086	0	0	0	0	0	0	0	0	0	0	0	0	0	0	0	0	0	0	0	0	0	0	0	0
Hippea	0	0	0	0	0	0	0	0	0	0	0	0	0	0	0	0	0	0	0	0	0	0	0	0	0	0	0	0	0.00289687	0	0	0	0	0	0	0	0	0	0	0	0	0	0	0	0	0	0	0	0
Hirschia	0	0	0	0	0	0	0	0	0	0	0	0	0	0	0	0	0	0	0	0	0	0	0	0	0	0	0	0	0	0	0	0	0	0	0	0	0	0	0	0	0	0	0	0	0	0	0	0	0
Histophilus	0.0033583	0	0	0	0.00507434	0.00279861	0	0.00390701	0.00420221	0	0.00315776	0	0	0	0.00405877	0.00429461	0.004998	0.00291239	0.00334493	0	0	0	0.00419533	0.00313421	0.00378043	0.00549209	0	0	0.00579374	0.0051843	0.00385193	0	0	0.00413496	0	0	0.0124417	0	0	0.00467028	0.00323761	0.00305055	0.00689061	0	0.0105407	0.0101153	0.00367323	0	0.0048992
Hoeflea	0	0	0	0	0	0	0	0	0.00420221	0	0.00315776	0	0	0	0	0.0128838	0	0.00291239	0.00334493	0	0	0	0	0	0	0	0	0	0.00289687	0.00259215	0.00385193	0	0	0.00413496	0	0	0	0	0	0	0	0	0	0	0	0	0	0	0.0024496
Hoyosella	0	0	0	0	0	0	0.00306673	0	0.00420221	0	0	0	0	0	0	0	0	0	0	0	0	0	0	0	0	0	0	0	0	0	0	0	0	0	0	0	0	0	0.00409702	0	0	0	0	0	0	0	0	0	0
Hp1virus	0	0	0	0	0	0	0	0	0	0	0	0	0	0	0	0	0	0	0	0	0	0	0	0	0	0	0	0	0	0	0	0	0	0	0	0	0	0	0	0	0.00323761	0	0	0	0	0	0	0	0
Hydrogenobacter	0	0	0	0	0	0	0	0	0	0	0	0	0	0	0	0.00429461	0	0	0	0	0	0	0	0	0	0	0	0	0	0	0	0	0	0	0	0	0	0	0	0	0	0	0	0	0	0	0	0	0
Hydrogenobaculum	0	0.00432732	0	0.0033036	0	0	0	0	0	0	0	0	0	0	0	0	0.004998	0	0	0	0	0	0	0.00313421	0	0.00549209	0	0	0	0	0	0	0	0	0	0	0	0.00476826	0	0	0	0	0	0	0	0	0	0	0
Hydrogenophaga	0.00671659	0	0.0131096	0.0099108	0.0101487	0.00839584	0	0	0.0168088	0.0117458	0.00631552	0	0	0.0085145	0.0121763	0.00429461	0.019992	0.00582479	0.0167246	0	0.0116489	0	0.0167813	0.0125368	0	0.00549209	0.00619771	0.00306204	0.00289687	0.00777645	0.00770386	0	0	0	0	0.00940601	0	0.00476826	0.0122911	0.00467028	0.00323761	0.00305055	0	0	0	0.0101153	0.00367323	0.00344828	0.0048992
Hydrogenovibrio	0	0	0.00873973	0	0	0	0	0	0.00420221	0	0	0	0	0	0	0	0	0	0	0	0	0	0	0	0	0	0	0	0	0	0	0	0	0	0	0	0	0	0	0	0	0	0	0.00343749	0	0	0	0	0
Hymenobacter	0.0235081	0.00432732	0.0393288	0.0363396	0.0101487	0.0167917	0.0184004	0.011721	0.0420221	0.0234916	0.0221043	0.00527065	0	0.00283817	0.0365289	0.00858922	0.039984	0.0320363	0.0133797	0.0167631	0	0.0247568	0.0335627	0.0282079	0	0.0274605	0.0185931	0.00918611	0.023175	0.0207372	0.0115558	0.0079526	0	0.00413496	0	0.032921	0	0.00476826	0.0614553	0.0210163	0.016188	0.0244044	0.0206718	0.01375	0.0158111	0	0.0183661	0.0310345	0.0269456
Hyphomicrobium	0.00671659	0	0.0131096	0.0066072	0.00507434	0.00559722	0.00306673	0.00390701	0.00420221	0.00783055	0.00631552	0	0	0.00283817	0.00405877	0.00429461	0.004998	0.00582479	0.00334493	0	0	0	0.00839067	0.00940262	0	0	0.00619771	0	0.00869061	0	0	0	0	0	0	0	0	0.00953653	0.00409702	0	0.00647522	0.00610109	0	0.00343749	0.00527037	0	0	0.0103448	0.0048992
Hyphomonas	0.0033583	0	0	0	0	0.00279861	0	0	0	0	0	0	0	0	0.00405877	0	0	0.00291239	0	0	0.00582445	0	0	0	0	0	0.00309885	0	0	0	0	0	0	0	0	0	0	0	0.00409702	0.00233514	0	0	0	0	0	0	0	0	0.0024496
Ichnovirus	0	0	0	0	0	0	0	0	0	0	0	0	0	0	0	0	0	0	0	0	0	0	0	0	0	0	0	0	0	0	0	0	0	0	0.0290529	0	0	0	0	0	0	0	0	0	0	0	0	0	0
Ichthyobacterium	0.0033583	0	0	0	0	0	0	0	0	0	0	0	0	0	0.00405877	0	0	0.00291239	0	0	0	0	0.00419533	0.00313421	0	0.00549209	0.00309885	0	0	0	0	0	0	0	0	0.004703	0	0	0.00409702	0	0	0	0	0	0	0	0	0	0.0024496
Ictalurivirus	0	0	0	0	0	0	0	0	0	0	0	0	0	0	0	0	0	0	0	0	0	0	0	0	0	0	0	0	0	0	0	0	0	0	0	0	0	0	0	0	0	0	0	0	0	0	0	0	0
Idiomarina	0	0	0	0	0	0	0	0	0	0	0	0.00527065	0	0.00283817	0	0	0	0	0	0	0	0	0	0	0	0	0	0	0	0.00259215	0	0	0	0	0	0	0	0.00476826	0	0	0	0.00305055	0	0	0	0	0	0	0
Ignavibacterium	0	0	0	0	0	0	0	0	0	0	0	0	0	0	0	0	0	0	0	0	0	0	0	0	0	0	0	0	0	0	0	0	0	0	0	0	0	0	0	0	0	0	0	0	0	0	0	0	0
Ilumatobacter	0	0	0	0.0033036	0	0	0	0.00781403	0.00420221	0.00391527	0	0	0	0.00283817	0	0	0	0.00291239	0	0	0	0.00247568	0	0.00940262	0	0.00549209	0	0	0.00579374	0.00259215	0	0.0119289	0	0	0	0.004703	0	0	0	0	0	0	0	0	0	0	0.00367323	0.00344828	0.0048992
Ilyobacter	0	0	0	0	0.00507434	0.00279861	0	0	0	0	0	0	0	0.00283817	0	0	0	0.00582479	0	0.00419076	0.00582445	0	0.00839067	0	0	0	0	0.00306204	0	0	0	0	0	0	0	0	0	0	0.0204851	0.00467028	0.00323761	0.00305055	0	0	0	0.0101153	0.0183661	0	0
Immundisolibacter	0	0	0	0	0	0.00279861	0	0	0	0	0	0	0	0	0	0	0	0.00291239	0	0	0	0	0.00419533	0.00313421	0.00378043	0	0.00309885	0	0	0.00259215	0	0.0039763	0	0	0	0	0.00622084	0	0	0	0	0	0	0	0	0	0	0	0.0024496
Intestinimonas	0.238439	0.0302912	0.930781	0.690453	0.137007	4.41341	1.74497	3.20375	1.03374	1.10019	2.53252	0.268803	0.173785	0.377476	0.75899	0.38222	0.584766	4.9336	0.973374	5.15883	0.827072	0.113881	0.696426	0.548486	0.574626	0.57667	0.632166	0.483802	0.625724	0.48214	0.508455	0.660066	0.153365	0.243963	0	0.319804	0.4479	2.67023	1.00787	0.66785	0.158643	1.07074	4.59948	0.268124	0.221356	0.111268	0.609756	1.0069	0.886755
Intrasporangium	0	0	0	0	0	0	0	0	0	0	0	0	0	0	0	0	0	0	0	0	0	0	0	0	0	0	0	0	0	0	0	0	0.00613459	0	0	0	0	0	0	0	0	0	0	0	0	0	0	0	0.0024496
Iridovirus	0	0	0	0	0	0	0	0	0	0	0	0	0	0	0	0	0	0	0	0	0	0	0	0	0	0.00549209	0	0	0	0	0	0	0	0	0	0	0	0	0	0	0	0	0	0	0	0	0	0	0
Isoptericola	0	0	0.00873973	0.0099108	0	0	0	0	0	0.00391527	0	0	0	0	0	0	0	0	0	0	0.0407712	0	0	0	0	0	0	0	0.00579374	0	0	0	0.0184038	0	0	0.00940601	0	0	0.00819404	0.00233514	0.00323761	0.00610109	0	0	0	0	0	0	0
Isosphaera	0	0	0	0	0	0	0	0	0	0	0	0	0	0	0	0	0	0	0	0	0	0	0	0	0	0	0	0	0.00289687	0	0	0	0	0	0	0	0	0	0	0	0	0	0	0	0	0	0	0	0
Janibacter	0	0	0.00436986	0.0066072	0	0	0	0	0	0	0.00315776	0	0	0	0	0	0	0	0	0.00419076	0.00582445	0	0	0	0	0	0	0	0	0	0	0	0	0	0	0	0	0	0.00409702	0	0	0	0	0	0	0	0	0	0
Jannaschia	0	0	0	0	0	0	0	0.00390701	0	0	0	0	0	0	0	0	0	0.00291239	0	0	0.00582445	0	0	0.00313421	0	0	0	0	0	0	0	0.0119289	0	0	0	0	0	0	0	0	0	0	0	0	0.0105407	0	0	0	0
Janthinobacterium	0.0033583	0	0.0305891	0.016518	0	0.00559722	0.00613346	0.00390701	0.00420221	0.00783055	0.00631552	0.00527065	0	0	0.00405877	0.0128838	0.004998	0.0116496	0.00334493	0.0125723	0.00582445	0.00247568	0.00419533	0.0125368	0	0.0109842	0.00309885	0	0.00289687	0.00259215	0	0.0079526	0	0	0	0.004703	0	0	0.00409702	0.00934056	0.00647522	0.00915164	0.00344531	0.00343749	0	0.0101153	0.00367323	0.00689655	0.0097984
Jatrophihabitans	0	0	0	0.0033036	0	0	0	0	0	0	0	0	0	0	0	0	0	0	0	0	0	0	0	0	0	0	0	0	0	0	0	0.0039763	0	0	0	0	0	0	0	0	0	0.00305055	0	0	0	0	0	0	0
Jd18virus	0	0	0	0	0	0	0	0	0	0	0	0	0	0	0	0	0	0	0	0	0	0	0	0	0	0	0	0	0	0	0	0	0	0	0	0	0	0	0	0	0	0	0	0	0	0	0	0	0
Jeongeupia	0	0	0	0	0	0.00279861	0	0	0.00420221	0	0.00631552	0	0	0	0.00405877	0	0	0	0.00334493	0	0	0	0.00419533	0	0	0.00549209	0	0	0.00289687	0	0	0.0039763	0	0	0	0	0	0	0	0.00233514	0.00323761	0	0	0	0	0	0.00367323	0	0
Jeotgalibaca	0	0	0	0.0033036	0	0.00279861	0	0	0	0	0	0	0	0	0.00405877	0	0	0	0	0	0.00582445	0	0	0	0	0	0.00619771	0	0	0	0	0.0039763	0	0.00413496	0	0	0	0	0.00409702	0.00233514	0	0.00305055	0	0	0.00527037	0	0	0	0.0024496
Jeotgalibacillus	0	0	0	0	0	0	0	0.011721	0	0.00391527	0.00315776	0	0	0.00283817	0	0.00429461	0.009996	0.00582479	0.00334493	0	0.00582445	0.00247568	0.00419533	0	0	0	0.00309885	0	0	0	0	0	0	0.00413496	0	0	0	0.00476826	0	0	0	0	0	0.00343749	0	0	0.00367323	0	0
Jeotgalicoccus	0	0	0	0	0	0	0.00306673	0	0	0	0	0	0.00434461	0	0	0	0	0	0	0	0	0	0	0	0	0	0	0	0	0.00259215	0.00385193	0.0039763	0	0.00413496	0	0	0.00622084	0.00476826	0	0	0	0	0	0.00343749	0	0	0.00367323	0	0
Jerseyvirus	0	0	0	0	0.00507434	0	0	0	0	0	0	0	0	0	0	0	0	0	0.00334493	0	0	0	0	0	0	0	0	0	0	0	0	0	0	0.00826993	0	0	0	0	0	0	0	0	0	0	0	0	0	0	0
Jiangella	0.0100749	0	0.00436986	0.0066072	0	0	0	0	0.00840442	0.00391527	0	0	0	0	0.00405877	0	0	0.00582479	0	0.00419076	0	0.00247568	0.00419533	0.00313421	0	0	0.00309885	0	0.00869061	0.0051843	0	0	0	0	0	0.00940601	0	0	0.0122911	0.00467028	0	0	0.00344531	0	0	0	0.00367323	0.00689655	0.0073488
Jonesia	0	0	0	0.0033036	0	0	0	0	0.00420221	0	0	0	0	0	0	0	0.004998	0	0	0	0	0	0	0	0	0	0	0	0	0	0	0	0	0.00413496	0	0	0	0	0	0.00233514	0	0	0	0	0	0	0	0	0
Jonquetella	0	0	0	0.0033036	0.00507434	0.00279861	0	0.00390701	0.0126066	0.0117458	0	0.0158119	0	0.00283817	0.00405877	0	0.004998	0.00582479	0.00334493	0.0419076	0	0	0.00419533	0	0	0.00549209	0.00309885	0	0.00579374	0	0	0.0039763	0	0	0	0.004703	0	0.00953653	0.00819404	0.00934056	0	0.00305055	0.0344531	0	0.00527037	0	0	0.00689655	0.0097984
Js98virus	0	0	0	0	0	0	0	0	0	0	0	0	0	0	0	0	0	0	0	0	0	0	0	0	0	0	0	0	0	0	0	0	0	0	0	0	0	0	0	0	0	0	0	0	0	0	0	0	0
K1gvirus	0	0	0	0	0	0	0	0	0	0	0	0	0	0	0	0	0	0	0.0635537	0	0	0	0	0	0	0	0	0	0	0	0	0	0	0	0	0	0	0	0	0	0	0	0	0	0	0	0	0	0
Kangiella	0	0	0.00436986	0	0	0	0	0	0	0	0	0	0	0	0	0	0	0	0	0	0.00582445	0	0	0	0	0.00549209	0	0	0	0	0	0	0	0	0	0	0.00622084	0	0.00409702	0	0	0	0	0	0	0	0	0.00344828	0
Kayvirus	0	0	0	0	0	0	0	0	0	0	0	0	0	0	0	0	0	0	0	0	0	0	0	0	0	0	0	0	0	0	0	0	0	0	0.0581058	0	0	0	0	0	0	0	0	0	0	0	0	0	0
Ketogulonicigenium	0	0	0	0	0	0	0	0	0	0	0.00315776	0	0	0	0	0	0	0.00291239	0.00334493	0.00419076	0	0	0	0.00313421	0	0	0.00309885	0	0	0.00259215	0	0	0	0	0	0	0	0	0.0122911	0	0	0.00305055	0	0	0.00527037	0	0	0.00344828	0
Kibdelosporangium	0	0	0	0.0033036	0	0	0.00306673	0.00390701	0.00420221	0.00391527	0	0.00527065	0	0.00283817	0.00405877	0	0.009996	0	0	0.00419076	0	0	0	0	0	0	0	0	0	0	0.00385193	0	0	0	0	0	0.0124417	0	0.00409702	0.00233514	0	0	0	0	0	0.0101153	0	0	0.0073488
Kineococcus	0	0	0	0	0	0	0	0	0.00420221	0	0	0	0	0	0	0	0	0	0	0	0	0	0.00419533	0	0	0	0	0	0	0	0	0	0.00613459	0	0	0	0	0	0.00409702	0.00233514	0	0	0.00344531	0	0	0	0	0.00344828	0
Kinetoplastibacterium	0.0033583	0	0	0	0.00507434	0.00279861	0.00306673	0	0	0	0	0.00527065	0	0	0	0	0.004998	0	0.00334493	0	0	0	0.00419533	0.00313421	0	0.00549209	0	0.00306204	0.00289687	0	0	0.0039763	0	0	0.0290529	0	0.00622084	0.00476826	0	0	0.00323761	0	0	0.00343749	0	0	0.00367323	0	0.0024496
Kiritimatiella	0	0	0	0	0	0	0	0.00390701	0	0	0	0	0	0	0	0	0.004998	0	0	0	0	0	0	0	0	0	0	0	0	0	0.00385193	0	0	0	0	0	0	0	0	0	0.00323761	0	0	0	0	0	0	0	0
Kitasatospora	0.00671659	0	0.0218493	0.0033036	0	0.00279861	0.00613346	0.00390701	0	0	0.00315776	0	0.00434461	0	0.00405877	0.0128838	0.004998	0.00291239	0.00668986	0	0	0	0.00419533	0.0125368	0	0.00549209	0.00619771	0.00306204	0	0.00259215	0.00770386	0.0079526	0	0.00413496	0	0.004703	0	0.00476826	0.00409702	0.00467028	0	0.00305055	0	0	0.0105407	0.0101153	0.00367323	0.00344828	0.0073488
Klebsiella	0.0100749	0.82219	0.0174795	0	10.6866	0.00279861	4.51116	0.136745	11.4804	0.779139	0.00947328	0.316239	0.00434461	8.38962	0.0487053	0.0386515	0.014994	0.0174744	0.25087	0.44003	0.879492	0.368876	0.00839067	0.0188052	0.00756086	1.2522	0.0185931	2.67928	1.51796	0.225517	0.516159	0.0079526	0.0122692	13.0169	0	0.277477	1.92224	0.00953653	0.217142	0.0630488	0.686373	0.00610109	0.299742	11.9006	0.163381	21.3534	0.176315	0.241379	0.48992
Kluyvera	0	0	0	0	0	0	0	0	0	0.00391527	0.00315776	0	0	0	0.00405877	0	0	0.00291239	0	0	0	0	0.00419533	0	0	0	0	0.00612407	0.00289687	0	0	0	0	0	0	0	0.00622084	0	0	0.00467028	0	0	0	0.00343749	0	0	0	0	0.0171472
Kocuria	0.0033583	0	0.00873973	0.016518	0.0101487	0.00279861	0	0.0195351	0.0126066	0.0156611	0.00947328	0	0	0	0.00811754	0.00429461	0.014994	0.00582479	0.0133797	0.00838153	0.0116489	0.00247568	0.012586	0.00626841	0	0.00549209	0.0123954	0	0.0202781	0.00777645	0.0192597	0.0079526	0	0	0	0.004703	0	0.00953653	0.0245821	0.00700542	0.00323761	0.00610109	0.00689061	0.00687498	0.0158111	0	0.00734646	0.0103448	0.0073488
Komagataeibacter	0.0100749	0	0.0174795	0.0033036	0.00507434	0.00839584	0	0	0.00420221	0.0117458	0.00631552	0.00527065	0	0	0.0121763	0.00429461	0.014994	0.00582479	0.00334493	0.0125723	0.00582445	0	0.012586	0.00313421	0	0.00549209	0	0	0.00289687	0.00259215	0.0154077	0.0039763	0	0	0	0.004703	0	0.00476826	0.0163881	0	0.00647522	0.00610109	0.00344531	0.0103125	0.00527037	0	0.00734646	0.0137931	0.0097984
Kosakonia	0.0033583	0	0.0174795	0.0033036	0	0	0.0153337	0.011721	0.00840442	0	0	0.00527065	0	0.00283817	0.00405877	0.00429461	0.009996	0.00291239	0.00334493	0.00419076	0	0.00247568	0.00419533	0.00626841	0	0.0109842	0.00619771	0	0.00869061	0.0129608	0.00385193	0.0039763	0	0.0372147	0	0.004703	0.0622084	0	0.00819404	0.00467028	0.00323761	0.00305055	0	0.00343749	0	0	0.00734646	0	0.0146976
Kosmotoga	0	0.00432732	0	0	0	0	0	0	0	0	0	0	0	0	0	0	0	0	0	0.00419076	0	0	0	0	0	0	0	0	0	0	0.00385193	0	0.00613459	0.00413496	0	0	0	0	0.00409702	0.00233514	0	0	0	0	0	0	0	0	0
Kozakia	0	0	0	0	0	0.00279861	0	0	0	0	0	0	0	0	0	0	0.004998	0	0	0	0	0	0.00419533	0	0	0	0	0	0.00289687	0.00259215	0	0	0	0	0	0	0	0	0	0	0	0	0	0	0	0	0	0.00344828	0
Kp15virus	0	0	0	0	0	0	0	0	0.0588309	0	0	0	0	0	0	0	0	0	0	0	0	0	0	0	0	0	0	0	0	0	0	0	0	0	0	0	0	0	0	0	0	0	0	0	0	0	0	0	0
Kp32virus	0	0	0	0	0	0	0	0	0	0	0	0	0	0	0	0	0	0	0	0	0	0	0	0	0	0	0	0	0	0	0	0	0	0	0	0	0	0	0	0	0	0	0	0	0	0	0	0	0
Kp34virus	0	0	0	0	0	0	0	0	0	0	0	0	0	0	0	0	0	0	0	0	0	0	0	0	0	0	0	0	0	0	0	0	0	0	0	0	0	0	0	0	0	0	0	0	0	0	0	0	0
Kp36virus	0	0	0	0	0	0	0	0	0	0	0	0	0	0	0	0	0	0	0	0	0	0	0	0	0	0	0	0	0	0	0	0	0	0	0	0	0	0	0	0	0	0	0	0	0	0	0	0	0
Kribbella	0	0	0	0	0	0	0.00306673	0	0	0	0.00315776	0	0	0	0	0	0	0	0	0	0	0	0	0.00313421	0	0	0	0	0	0.00259215	0	0	0	0	0	0	0.00622084	0	0	0	0	0.00610109	0	0	0	0	0	0.00344828	0
Kurthia	0.0033583	0	0.0131096	0.0099108	0	0.00279861	0	0.00390701	0	0.00783055	0.00947328	0	0	0	0.00811754	0	0.009996	0	0.00668986	0	0	0	0.00419533	0	0	0.00549209	0	0	0.00289687	0.0051843	0	0	0	0.00413496	0	0	0	0.00953653	0.00819404	0.00233514	0.00647522	0	0	0	0	0	0.00367323	0	0.0024496
Kushneria	0.0033583	0	0	0	0	0.00279861	0.00306673	0	0	0.00783055	0	0	0	0	0.00811754	0.00858922	0	0.00291239	0.00668986	0	0	0	0	0.00313421	0	0.0164763	0.00619771	0	0	0.00259215	0	0.0039763	0	0	0	0	0	0.00476826	0	0.00467028	0.00647522	0.00915164	0.00344531	0	0	0	0.00367323	0.00344828	0.0024496
Kutzneria	0	0	0.00436986	0	0	0	0	0	0	0	0	0.00527065	0	0	0.00405877	0	0	0	0	0	0	0	0	0	0	0	0	0	0	0	0	0.0079526	0	0	0	0	0	0	0.00409702	0	0	0.00305055	0	0.00343749	0	0	0	0	0.0024496
Kyrpidia	0.0033583	0	0	0.0066072	0	0	0.00306673	0	0	0.00391527	0.00315776	0.00527065	0	0.00283817	0.0121763	0	0	0	0.00334493	0	0	0	0.00419533	0.0125368	0	0.0164763	0	0	0	0.00259215	0	0	0	0	0	0.004703	0.00622084	0	0.00409702	0	0	0.00610109	0	0	0	0	0.00367323	0	0
Kytococcus	0.0033583	0	0.0131096	0	0	0	0	0	0.00420221	0	0	0	0	0	0	0	0.004998	0.00291239	0.00334493	0.00419076	0.0116489	0	0	0.00313421	0	0	0	0	0.00289687	0.00259215	0	0.0039763	0.00613459	0.00413496	0	0.00940601	0	0	0	0	0	0.00610109	0	0.00343749	0	0	0	0	0
Labrenzia	0	0	0	0	0	0.00279861	0	0.00390701	0	0.00391527	0	0	0	0	0	0	0.004998	0	0.00668986	0	0	0.00247568	0.00839067	0	0.00378043	0.00549209	0	0	0	0	0	0	0.00613459	0	0	0.004703	0	0	0.00819404	0	0.00323761	0.00610109	0	0	0	0	0	0	0.0048992
Lachnoclostridium	1.50788	6.21836	3.53522	1.32805	16.5931	11.8381	2.17431	8.59543	1.79434	9.41623	2.62094	22.2211	15.8144	1.71142	1.96445	1.57183	1.85926	1.57269	2.13741	12.9914	4.78187	7.57557	1.51871	1.25368	11.863	1.81788	7.70685	1.3228	1.31808	1.3194	1.26729	10.6684	18.2381	3.53126	0	1.32625	5.72317	5.67423	1.32334	1.00878	3.40596	1.3758	12.1585	3.88436	3.00411	0.576573	9.24919	8.51379	1.31788
Lacimicrobium	0	0	0	0	0	0.00279861	0	0.00390701	0	0	0	0	0	0.00283817	0	0	0	0	0	0	0	0	0	0.00626841	0	0	0	0	0.00289687	0.00259215	0	0	0	0	0	0	0	0	0.00409702	0.00233514	0	0	0	0.00343749	0	0	0	0	0
Lacinutrix	0	0	0	0	0	0	0	0	0.00840442	0	0	0	0	0	0	0	0	0	0	0	0	0	0	0	0	0	0	0	0	0	0	0	0	0	0	0	0	0	0	0	0	0	0	0	0	0	0	0	0
Lactobacillus	1.41384	10.5803	0.0830274	0.0693756	2.8873	0.973917	3.81808	1.60969	0.117662	0.736071	7.63863	6.22464	0.165095	0.553443	2.00503	9.23341	8.31168	3.57933	0.127107	0.938731	0.0990157	1.38885	4.50579	2.1438	4.02238	4.62434	10.7034	0.0734889	0.793743	5.93084	1.15173	1.01396	8.64364	0.103374	37.8559	11.9221	7.17885	6.89968	0.262209	0.847656	2.58361	9.28587	0.79242	6.09811	0.205544	2.72102	4.20585	0.0724138	0.073488
Lactococcus	0.033583	0.0476005	0.0174795	0.066072	0	0.0251875	0.00613346	0.0390701	0.0252133	0.0117458	0.0284199	0.00527065	0.0130338	0.0141908	0.0121763	0.0515353	0.044982	0.014562	0.0334493	0.0209538	0.0174734	0.00742703	0.0419533	0.0188052	0.0189022	0.0439367	0.021692	0.0244963	0.0347625	0.0362901	0.0308155	0.0238578	0.0490767	0.0330797	0	0.018812	0.0248834	0.0190731	0.0819403	0.0233514	0.0129504	0.0305055	0.00689061	0.0309374	0.0685148	0.0303459	0.00734646	0.0172414	1.90824
Lacunisphaera	0	0	0.00436986	0	0	0	0	0.00781403	0	0.00783055	0	0	0.00434461	0	0	0	0.004998	0	0	0.00419076	0	0	0.00839067	0	0	0	0.00309885	0	0	0	0.00770386	0	0	0	0	0	0	0.00953653	0	0.00233514	0	0	0.00344531	0.00343749	0	0	0.00367323	0	0.0024496
Lambdavirus	0	0	0	0	0	0	0	0	0	0	0	0	0	0	0	0.00429461	0	0	0	0	0	0	0	0	0	0	0	0	0	0	0.00385193	0	0	0	0	0	0	0	0	0	0	0	0	0	0	0	0	0	0
Laribacter	0	0	0.00873973	0	0	0	0	0	0.00420221	0.00391527	0.00315776	0	0	0.00567634	0.00405877	0	0.004998	0	0	0	0	0.00247568	0.00419533	0.00313421	0	0.00549209	0.00309885	0.00306204	0	0	0	0	0.00613459	0	0	0	0	0	0.00409702	0	0.00323761	0	0	0.00687498	0	0	0.00367323	0	0.0048992
Lawsonella	0	0	0.0873973	0.0033036	0	0	0	0	0	0	0	0	0	0	0	0	0	0	0	0	0	0	0	0	0	0	0	0	0	0.00259215	0	0	0	0.00413496	0	0	0	0	0	0	0	0	0	0	0	0	0	0	0
Lawsonia	0.0033583	0	0.00873973	0.0033036	0	0	0.00306673	0	0	0	0.00947328	0	0.00434461	0	0	0.00429461	0	0.00291239	0.0200696	0.00419076	0	0	0.00419533	0.00940262	0	0	0	0.0122481	0.0115875	0	0	0.0079526	0	0	0.0581058	0	0.00622084	0.00953653	0.00819404	0.016346	0	0	0	0	0.0210815	0	0	0.00689655	0.0073488
Leadbetterella	0	0.00432732	0	0	0	0.00279861	0	0.00390701	0	0	0	0	0	0	0.00405877	0	0	0	0.00334493	0.00419076	0	0	0	0.00313421	0	0.00549209	0	0	0.00289687	0	0	0	0	0	0	0.004703	0	0.00476826	0	0	0	0	0.00344531	0	0	0	0	0.00689655	0.0024496
Leclercia	0	0	0	0	0	0	0.671614	0.0156281	0.00420221	0	0.00315776	0.00527065	0	0	0	0	0	0	0	0	0	0	0	0.00313421	0.00378043	0	0	0.00612407	0.00579374	0.0285137	0	0	0	0	0	0	0	0	0.00409702	0.00467028	0	0.00305055	0	0.00343749	0	0	0	0	0.0048992
Legionella	0	0	0.00873973	0	0	0.00279861	0	0.00390701	0.00420221	0	0.00315776	0	0	0.00283817	0	0	0.009996	0.00582479	0.00668986	0.00419076	0	0	0	0.00313421	0	0	0.00309885	0.00306204	0.00289687	0.00259215	0.0115558	0.0079526	0.00613459	0.00413496	0	0	0	0.00953653	0.00409702	0.00233514	0.00323761	0	0.00344531	0.00687498	0	0	0	0	0.0048992
Leifsonia	0.00671659	0	0.0174795	0.0099108	0	0.00559722	0	0	0.0126066	0.00391527	0.00631552	0	0.00434461	0.00567634	0.00405877	0	0	0.00291239	0.0100348	0.00419076	0.0232978	0.00247568	0.00419533	0.00626841	0	0.00549209	0	0	0	0.00259215	0.00385193	0.0079526	0.00613459	0.00413496	0	0	0.00622084	0.00953653	0.00409702	0.00233514	0	0.00610109	0	0	0	0	0.00734646	0	0
Leisingera	0	0	0	0	0	0	0	0	0	0	0	0.00527065	0	0.00283817	0	0	0	0	0	0	0.00582445	0	0	0	0	0	0	0	0	0	0	0	0	0	0	0	0	0	0	0	0	0	0	0.00343749	0	0	0	0	0.0024496
Lelliottia	0	0	0	0	0.00507434	0.00279861	0.0214671	0.0468842	0.00840442	0	0	0.00527065	0	0	0	0.00858922	0	0.00291239	0	0	0.00582445	0.00247568	0	0.00313421	0	0	0.00309885	0	0.0115875	0	0	0.0039763	0	0.0124049	0	0	0.0497667	0	0.00409702	0.00700542	0.00647522	0.00610109	0	0.00343749	0.00527037	0	0.00734646	0.00344828	0.0073488
Lentibacillus	0	0.00432732	0	0	0	0	0	0	0	0	0.00315776	0	0	0	0	0	0	0	0	0	0.00582445	0.00247568	0	0.00313421	0	0	0	0	0	0	0	0	0	0	0	0	0	0	0	0	0	0	0.00344531	0	0	0	0	0	0
Lentzea	0	0	0.00436986	0	0	0.00559722	0	0	0	0	0.00315776	0.00527065	0	0.00283817	0	0	0	0.00291239	0	0	0	0.00247568	0	0	0	0	0.00309885	0	0.00289687	0	0	0	0.00613459	0.00413496	0	0	0	0.00476826	0.00819404	0	0	0	0.00344531	0	0	0	0	0	0
Leptolyngbya	0	0	0	0	0	0	0	0	0	0	0	0	0	0	0	0	0	0	0.00334493	0.00419076	0	0	0	0	0	0.00549209	0.00309885	0	0	0	0	0	0	0	0	0	0.00622084	0.00476826	0	0.00233514	0	0	0.00344531	0	0	0	0.00367323	0	0
Leptospira	0	0	0.00436986	0	0	0	0	0	0	0	0	0	0	0	0.00405877	0	0	0	0.00334493	0.00419076	0	0	0.00419533	0	0	0	0.00309885	0	0.00289687	0	0	0	0	0	0	0	0	0	0	0	0	0.00305055	0	0	0	0	0	0	0
Leptospirillum	0.0033583	0	0	0.0033036	0	0	0	0	0.00420221	0	0	0	0	0	0	0.00429461	0	0	0	0.00419076	0	0.00247568	0	0.00313421	0	0.00549209	0	0	0	0	0	0	0	0	0	0	0	0	0	0	0	0	0	0	0	0	0.00367323	0	0.0024496
Leptothrix	0	0.00432732	0	0	0	0	0	0	0.00420221	0	0	0	0	0	0.00405877	0.00429461	0	0	0.00334493	0	0	0	0	0	0	0	0	0	0.00289687	0	0.00385193	0	0	0	0	0	0	0	0	0.00233514	0.00323761	0.00305055	0.00344531	0	0	0	0	0	0
Leptotrichia	0.0033583	0.00865464	0.00436986	0	0.00507434	0.00839584	0.0122669	0.00390701	0	0.00391527	0.0157888	0	0.00434461	0	0.00405877	0.0257677	0.009996	0.00582479	0.00334493	0.00838153	0.00582445	0	0.00839067	0.00626841	0.0189022	0.0109842	0.0123954	0	0.00579374	0.00777645	0	0	0.00613459	0.00413496	0	0.004703	0	0.0143048	0.00409702	0.00467028	0.00323761	0.00305055	0.00689061	0.00687498	0.0210815	0	0.00734646	0	0.0073488
Leuconostoc	0	0.0216366	0	0	0	0	0.00306673	0.00390701	0.0126066	0.00783055	0.00947328	0	0	0.00283817	0.00811754	0.00429461	0.014994	0.00582479	0.00334493	0.00838153	0.0116489	0.00495135	0.00419533	0.00626841	0.00378043	0.0109842	0.0247908	0.00306204	0.00289687	0	0.0115558	0	0	3.94476	0	0	0.00622084	0.00476826	0.00409702	0.00467028	0.00971282	0.00915164	0.00689061	0	0.00527037	0	0	0.00344828	0.0073488
Libanicoccus	0.130974	0.0216366	0.166055	0.171787	0.0608921	0.0335833	0.0122669	0.160188	0.281548	0.203594	0.167361	0.126496	0.186818	0.0823069	0.316584	0.214731	0.179928	0.142707	0.163902	0.247255	0.0698934	0.0445622	0.213962	0.191187	0.211704	0.571178	0.21692	0.0398065	0.188297	0.0466587	0.223412	0.0556682	0.165634	0.00413496	0	0.315101	0.0497667	0.252718	0.323664	0.179806	0.152168	0.228791	0.151593	0.288749	0.353115	0.0101153	0.143256	0.258621	0.173922
Liberibacter	0	0	0	0	0	0	0	0	0	0	0	0	0	0	0	0	0	0	0	0	0	0	0	0	0	0	0	0	0	0	0	0	0	0	0	0	0	0	0	0	0	0	0	0	0	0	0	0	0.0024496
Limnochorda	0.0033583	0	0.0218493	0.0066072	0	0.00279861	0.00306673	0.00781403	0.00420221	0.00391527	0.00947328	0.00527065	0	0.00283817	0.00405877	0	0.009996	0.00291239	0.00334493	0	0	0	0.00839067	0.00313421	0.00378043	0.00549209	0	0.00306204	0.00579374	0.00259215	0	0.0119289	0	0.00826993	0	0.004703	0.00622084	0.00476826	0	0.00467028	0.00971282	0.00915164	0.00689061	0.00343749	0	0	0.00367323	0.00689655	0.0024496
Limnohabitans	0	0	0.00436986	0	0	0	0	0.00781403	0	0	0	0	0	0	0.00405877	0	0.004998	0.00582479	0.00334493	0	0.00582445	0.00495135	0.00419533	0.00313421	0	0.00549209	0	0.00612407	0.00289687	0	0	0.0039763	0	0	0	0	0	0.00476826	0.00409702	0	0.00323761	0.00305055	0	0.00343749	0	0	0	0	0.0073488
Lineavirus	0	0	0	0	0	0	0	0	0	0	0	0	0	0	0	0	0	0	0	0	0	0	0	0	0	0	0	0	0.00289687	0	0	0	0	0	0	0	0	0	0	0	0	0	0	0	0	0	0	0	0
Listeria	0.0134332	0.00432732	0.00436986	0.0099108	0	0	0.00306673	0.00390701	0.0126066	0.0117458	0.00315776	0	0	0	0.0202939	0.00429461	0.009996	0.00582479	0.00668986	0.0125723	0.0349467	0.00495135	0.00839067	0.015671	0.0113413	0.0164763	0.0123954	0.00612407	0.00869061	0.00777645	0.00770386	0	0	0.0124049	0.0290529	0	0.0497667	0.00953653	0.0122911	0.00467028	0.00971282	0.00915164	0.0103359	0.01375	0	0	0.00367323	0.00689655	0.0146976
Loktanella	0	0	0	0	0	0	0	0	0.00420221	0	0	0	0	0	0	0	0	0.00291239	0	0	0	0	0	0	0	0.00549209	0.00309885	0	0	0	0	0	0	0	0	0	0.00622084	0.00476826	0	0	0.00323761	0	0	0	0	0	0	0	0
Luteimonas	0	0	0	0.0066072	0.00507434	0	0.00613346	0.00781403	0.00420221	0.0156611	0	0.00527065	0	0.00283817	0.00405877	0.00429461	0	0.00582479	0.00334493	0.00419076	0.00582445	0.00247568	0	0.00313421	0	0.00549209	0.00309885	0.00306204	0	0	0.00385193	0.0039763	0	0	0	0.018812	0	0.00953653	0.00409702	0.00467028	0	0.00610109	0.00689061	0	0.00527037	0	0	0.00689655	0.0073488
Luteipulveratus	0	0	0	0.0066072	0	0	0	0	0	0	0	0	0	0	0	0	0	0	0	0	0	0	0	0	0	0	0.00309885	0.00306204	0	0	0	0	0	0	0	0	0.00622084	0.00476826	0	0.00233514	0	0	0	0	0	0	0	0	0
Lutibacter	0	0	0	0	0	0	0.00306673	0	0	0	0.00315776	0	0	0	0	0	0.009996	0	0	0	0.00582445	0	0	0.00313421	0	0	0	0	0	0.00259215	0	0	0	0.00413496	0	0	0	0	0	0	0.00323761	0	0	0	0	0	0	0	0
Luz24virus	0	0	0	0	0	0	0	0	0	0	0	0	0	0	0	0	0	0	0	0	0	0	0	0	0	0	0	0	0	0	0	0	0	0	0	0	0	0	0	0	0	0	0	0	0	0	0	0	0
Lymphocryptovirus	0	0	0	0	0	0	0	0	0	0	0	0	0	0	0	0	0	0	0	0	0	0	0	0	0	0	0	0	0	0	0	0	0	0	0	0	0	0	0	0	0	0	0	0	0	0	0	0	0
Lysinibacillus	0.0100749	0	0.00436986	0.0099108	0	0	0.00613346	0.00390701	0.00420221	0.00391527	0.00631552	0.00527065	0	0	0.00405877	0.00429461	0	0.00291239	0.00668986	0	0.0116489	0	0.00839067	0	0.00378043	0.00549209	0.00619771	0	0.00579374	0.0051843	0.00385193	0.0039763	0.00613459	0.0124049	0	0.004703	0.00622084	0	0.00819404	0.00233514	0.00323761	0.00610109	0.00344531	0.00343749	0	0	0	0	0
Lysobacter	0.0033583	0	0.00436986	0.0033036	0	0.00839584	0.00613346	0.00781403	0.0126066	0	0	0	0	0.00283817	0.00405877	0	0	0.0116496	0.00334493	0.00419076	0.00582445	0.00247568	0.00419533	0	0	0.00549209	0	0	0.00579374	0	0.00770386	0	0	0.00826993	0	0.00940601	0	0	0.0122911	0.00233514	0.00647522	0.00610109	0.00344531	0.00343749	0	0	0.0110197	0.00689655	0.0024496
Macavirus	0	0	0	0	0	0	0	0	0	0	0	0	0	0	0	0	0	0	0	0	0	0	0	0	0	0	0	0	0	0	0	0	0	0	0	0	0	0	0	0	0	0	0	0	0	0	0	0	0
Macrococcus	0.0100749	0.00432732	0.00436986	0	0	0	0.00306673	0.00390701	0	0.00391527	0.00315776	0	0	0.00283817	0.0121763	0.00858922	0.004998	0.00291239	0.00334493	0	0	0	0	0	0.00756086	0.0109842	0.00309885	0	0.00289687	0.0051843	0.0154077	0.0079526	0.00613459	0.00413496	0	0.00940601	0	0.00953653	0.0163881	0.00233514	0.0129504	0.00305055	0.00689061	0.0103125	0	0	0.00367323	0	0.0097984
Mageeibacillus	0.0201498	0.00865464	0.0131096	0.0198216	0.00507434	0.0139931	0.0153337	0.00781403	0.0294155	0.0352375	0.0189466	0.0105413	0	0.0198672	0.0243526	0.0171784	0.019992	0.0116496	0.0267594	0.0335261	0.0349467	0.00990271	0.012586	0.0188052	0.00378043	0.0109842	0.0278897	0.0122481	0.0289687	0.0103686	0.00770386	0.0357867	0.00613459	0.00413496	0	0.028218	0.00622084	0.0333778	0.0327761	0.0256865	0.00323761	0.0152527	0.0275624	0.0171874	0.0105407	0.0202306	0.0220394	0.0241379	0.024496
Magnetococcus	0	0	0	0	0	0	0.00306673	0.00390701	0.00420221	0	0.00315776	0	0	0	0.00405877	0	0	0	0	0	0	0	0	0	0	0	0	0	0	0	0	0	0	0	0	0	0	0	0	0	0	0.00305055	0.00344531	0	0	0	0	0	0.0024496
Magnetospira	0	0	0	0	0	0	0	0	0	0	0	0	0	0	0	0	0	0	0	0	0	0.00247568	0	0	0	0	0	0	0	0	0	0	0	0	0	0.004703	0	0.00476826	0	0	0	0	0.00344531	0	0	0	0	0	0.0024496
Magnetospirillum	0	0	0.0131096	0.0066072	0	0.00279861	0	0.00781403	0	0.0156611	0.00631552	0	0.00434461	0.00567634	0.00405877	0.00429461	0.009996	0.014562	0.0133797	0.00419076	0.0174734	0	0.012586	0.00940262	0.00378043	0.00549209	0.00309885	0	0.00579374	0.0129608	0.00770386	0.0039763	0.00613459	0	0	0.023515	0.00622084	0.0143048	0.00819404	0.00467028	0	0.00305055	0.00689061	0.00687498	0.0105407	0	0.0110197	0.00344828	0.0097984
Mahella	0	0	0	0	0	0	0.00306673	0	0	0	0	0	0	0.00283817	0	0	0.004998	0.00291239	0	0	0	0	0	0	0.00378043	0	0	0	0.00289687	0.00259215	0	0.0039763	0	0	0	0	0	0	0	0	0	0.00305055	0	0	0	0	0.00367323	0	0.0024496
Mannheimia	0.0033583	0.0216366	0.00436986	0.0066072	0	0.00279861	0.0153337	0	0.00420221	0	0.00631552	0	0	0.0085145	0.00811754	0.00858922	0.009996	0.00291239	0.0100348	0.0125723	0.00582445	0.00247568	0.00419533	0.00940262	0.0113413	0.0109842	0.00619771	0.00612407	0.00289687	0	0	0	0.0122692	0.00826993	0	0.004703	0	0.00476826	0	0.00233514	0.00971282	0.00610109	0.00344531	0	0.00527037	0	0.00734646	0.00344828	0.0097984
Maribacter	0.0033583	0.00432732	0	0	0	0.00279861	0	0	0	0	0	0	0	0	0.00405877	0	0	0	0	0	0	0	0	0	0	0	0	0	0.00289687	0	0	0	0	0.00413496	0	0	0	0	0.00409702	0	0.00323761	0.00305055	0	0	0.00527037	0	0	0.00344828	0.0048992
Maricaulis	0	0	0	0	0	0	0	0	0	0	0	0	0	0	0	0	0	0	0	0	0	0	0	0.00313421	0	0	0	0	0	0	0	0	0	0	0	0	0.00622084	0	0.00409702	0	0.00323761	0	0	0	0	0	0	0	0
Marichromatium	0	0	0	0	0	0	0.00613346	0	0	0	0	0	0	0.00283817	0.00811754	0.00429461	0	0	0.0100348	0.00419076	0	0	0.00419533	0.00313421	0	0.0164763	0	0	0.00579374	0	0	0	0	0	0	0.004703	0	0.00476826	0.00409702	0.00233514	0	0.00305055	0	0.00343749	0	0	0	0	0.0024496
Marinilactibacillus	0	0	0	0	0	0	0	0.00390701	0	0	0.00315776	0	0	0	0	0.00429461	0	0	0	0	0	0	0	0.00626841	0	0	0	0	0	0.00259215	0	0	0	0	0	0.004703	0	0	0.00409702	0	0	0	0	0	0	0	0	0	0
Marinithermus	0	0	0.00436986	0	0	0	0	0.00390701	0	0.00391527	0.00315776	0	0	0	0	0	0	0	0	0	0	0	0	0	0	0	0.00619771	0	0.00289687	0	0	0	0	0	0	0	0	0	0	0.00233514	0	0.00305055	0.00689061	0	0	0	0.00367323	0.00344828	0
Marinitoga	0.0033583	0	0	0	0	0	0	0.00390701	0	0.00391527	0.00315776	0	0	0	0	0	0	0	0	0	0	0	0	0.00313421	0	0	0	0	0.00289687	0	0	0	0	0.00413496	0	0.004703	0	0.00476826	0	0.00700542	0	0	0.00344531	0	0	0	0	0	0
Marinobacter	0.00671659	0	0.0131096	0.016518	0.0202974	0.00279861	0.0092002	0.011721	0.0126066	0.0117458	0.00315776	0.0158119	0	0	0.0121763	0.00429461	0.034986	0.0174744	0.00334493	0.00838153	0.00582445	0.00247568	0.0293673	0.0188052	0	0.0164763	0.00619771	0.00306204	0.0115875	0.0103686	0	0.0198815	0.00613459	0	0	0.018812	0	0.00953653	0.0122911	0.00934056	0.00323761	0.00610109	0.00344531	0.00343749	0.00527037	0	0.00367323	0.0137931	0.0171472
Marinobacterium	0	0	0	0.0066072	0	0	0	0.00390701	0	0.00391527	0	0.00527065	0	0	0.00405877	0	0.004998	0	0	0	0	0	0.00419533	0	0	0.00549209	0.00309885	0	0	0.00259215	0	0	0	0	0	0	0	0	0	0	0	0.00305055	0	0	0	0	0	0.00689655	0.0048992
Marinomonas	0	0	0	0	0.00507434	0	0	0	0	0	0.00315776	0	0	0	0	0	0	0	0	0	0	0	0	0	0	0	0	0	0	0	0	0	0	0	0	0	0	0	0	0.00233514	0	0	0	0	0.00527037	0	0	0	0
Marinovum	0	0	0	0	0	0.00279861	0	0	0	0	0	0	0	0	0	0	0.004998	0.00291239	0	0	0	0.00247568	0	0	0	0	0.00309885	0	0	0	0	0.0039763	0	0	0	0	0	0	0	0.00233514	0	0	0	0	0	0	0	0	0.0024496
Marivirga	0	0	0	0	0	0	0	0	0.00420221	0	0	0	0	0	0	0	0	0	0	0	0	0	0	0	0	0	0	0	0	0	0	0	0	0	0	0	0	0	0	0	0	0	0.00344531	0	0	0	0	0	0.0024496
Marivivens	0	0	0	0	0	0	0	0.00781403	0.00420221	0	0.00315776	0	0	0	0	0	0	0	0	0	0	0	0	0	0	0	0	0.00306204	0	0	0	0	0	0	0	0	0.00622084	0	0	0	0	0	0	0	0	0	0	0	0
Marmoricola	0	0	0	0.0033036	0	0	0	0	0	0	0	0	0	0	0	0	0	0	0	0	0	0	0.00419533	0	0	0	0.00309885	0	0.00289687	0	0	0.0039763	0	0	0	0	0	0	0	0	0	0	0	0	0	0	0	0.00344828	0
Martelella	0.0134332	0	0.00873973	0.0132144	0	0.00279861	0	0.00390701	0.00840442	0	0.012631	0.0105413	0	0.00283817	0.0162351	0.00429461	0.004998	0.00582479	0.00334493	0.0167631	0.00582445	0.00247568	0.00419533	0.015671	0	0.0164763	0.00619771	0.00612407	0.0115875	0.00777645	0.00770386	0.0039763	0.00613459	0.00826993	0	0.00940601	0	0.00476826	0.0122911	0.00934056	0	0.00610109	0.00344531	0	0.00527037	0	0.00734646	0.0172414	0.0073488
Massilia	0.0100749	0	0.0131096	0.0033036	0	0.00279861	0.0245339	0.00781403	0.0126066	0.00391527	0.00631552	0.00527065	0	0.00283817	0	0.0128838	0.009996	0.00291239	0.0133797	0	0.0116489	0	0.00419533	0.00940262	0.00378043	0.0164763	0	0.00306204	0.0144844	0.0051843	0.00385193	0.0039763	0	0	0	0.004703	0	0	0.0122911	0.00467028	0.00971282	0.00610109	0.00689061	0	0	0	0.00734646	0.0172414	0.0048992
Mastadenovirus	0	0	0	0	0	0	0	0	0	0	0	0	0	0	0	0	0	0	0	0	0	0	0	0	0	0	0	0	0	0	0	0	0	0	0	0	0	0	0	0	0	0	0	0	0	0	0	0	0
Megamonas	1.06458	0.00432732	0.00873973	0.0066072	0.00507434	0	0.00613346	0.011721	0.0294155	0.0274069	0.00947328	0	0.00434461	0	0.0121763	0.231909	0	0.00582479	0.0133797	0.00838153	0	0	0.00419533	0.780417	0.00378043	0	0.00619771	0	0.00869061	0.0051843	0.00770386	0	0.00613459	0.00413496	0	0.004703	0	0.267023	0.00819404	0.00233514	0.870917	0.00915164	0.0103359	0.00343749	0.0105407	0.0101153	0.00367323	0	0.0048992
Megasphaera	4.30534	0	5.66335	0.0528576	0.0202974	0.0111944	0.00613346	0.0234421	0.00420221	0.0234916	0.012631	0.65356	0.0130338	0.00283817	5.71881	0.158901	0.02499	0.0116496	0.0234145	0.121532	0.0698934	2.73067	0.0419533	0.651915	0.00378043	0.241652	0.0123954	0.00306204	0.75898	0.0051843	0.0770386	0.0159052	0.539844	0.0620245	0	0.86065	0.0248834	0.0190731	0.0122911	0.0140108	0.0259009	0.0213538	0.0103359	0.00687498	0.479604	0.0910378	0.00367323	0.00344828	0.012248
Meiothermus	0	0	0.00873973	0.0099108	0	0	0	0	0.00420221	0	0.00315776	0	0	0	0.00405877	0	0.004998	0.00582479	0	0.00419076	0	0.00247568	0.00839067	0.00626841	0	0	0	0	0.00579374	0	0	0	0	0	0	0	0.0124417	0.00476826	0.00409702	0.00467028	0	0	0.00689061	0.00687498	0	0.0101153	0	0.0137931	0.0024496
Melioribacter	0	0	0	0.0033036	0	0	0.00613346	0	0	0	0.00315776	0	0	0	0	0	0	0	0	0	0	0	0	0.00313421	0	0	0	0	0	0.0051843	0.00385193	0	0	0	0	0.004703	0	0	0	0	0	0	0.00344531	0	0	0	0	0	0.0048992
Melissococcus	0.0033583	0	0	0.0033036	0	0	0	0	0	0	0	0	0	0	0.00405877	0	0	0	0.00334493	0	0	0	0	0	0	0.00549209	0	0	0	0.00259215	0	0.0039763	0	0	0	0	0	0	0	0	0	0	0	0	0.00527037	0	0	0	0
Melittangium	0	0	0.00436986	0	0	0	0	0	0	0.00391527	0	0.00527065	0	0	0	0	0.004998	0	0	0	0	0	0.00419533	0.00313421	0	0.00549209	0	0	0.00579374	0	0	0.0039763	0	0.00413496	0	0	0.00622084	0	0.00409702	0.00467028	0	0.00305055	0.00344531	0	0.00527037	0	0.00734646	0	0.0024496
Mesoplasma	0	0	0.00436986	0	0	0	0.00306673	0	0	0	0	0	0	0	0	0	0.004998	0.00291239	0	0	0.00582445	0.00247568	0	0	0	0	0.00619771	0.00306204	0	0	0.00385193	0.0039763	0.00613459	0.00826993	0	0.004703	0	0	0.00819404	0	0.00323761	0	0	0	0.00527037	0	0	0	0.0048992
Mesorhizobium	0.00671659	0	0.00873973	0.0033036	0	0.00559722	0.0092002	0.011721	0.00840442	0.0156611	0.00315776	0	0	0	0.0121763	0.00429461	0	0.00873718	0.0133797	0.00419076	0.00582445	0.00247568	0.012586	0.00313421	0.00378043	0.0274605	0.0123954	0.00612407	0.00289687	0.0051843	0.00385193	0.0198815	0	0	0	0	0.00622084	0.00476826	0.00819404	0.00467028	0.00647522	0.0152527	0.0137812	0	0.00527037	0	0.00367323	0.00344828	0.012248
Mesotoga	0	0	0	0	0	0	0.00306673	0	0	0	0	0	0	0	0	0	0.004998	0	0.00334493	0	0	0	0	0	0	0	0	0	0	0	0	0	0	0.00413496	0	0	0	0.00476826	0	0	0	0	0	0	0	0	0	0	0.0024496
Metallosphaera	0	0	0	0	0	0	0	0	0	0	0	0	0	0	0	0	0	0	0	0	0	0	0	0	0	0	0	0	0	0	0	0	0	0	0	0	0	0	0	0	0	0	0	0	0	0	0	0	0
Methanobacterium	0	0	0	0	0	0	0.00306673	0	0	0	0.00315776	0	0	0	0.00405877	0	0.004998	0.00291239	0	0	0	0	0	0	0.00378043	0	0.00309885	0	0.00289687	0.00259215	0	0	0	0.00413496	0	0	0	0	0.00409702	0.00233514	0.00323761	0	0	0	0	0	0.00367323	0.00344828	0
Methanobrevibacter	0	0	0	0	0	0	0	0	3.91646	0	0	0	0	0.00283817	0.00405877	0.00429461	0	2.49884	3.1643	0	0	0	0	0	0	0	0	0	0	0.00259215	0	2.9862	0	0.00413496	0	0	0	0.00476826	3.12193	0	0	0.00305055	1.28165	0.00343749	0	0	0.00367323	0	1.94498
Methanocaldococcus	0.0033583	0	0	0.0033036	0	0	0	0	0	0	0	0	0	0	0	0.00429461	0.004998	0	0	0	0	0	0	0.00313421	0	0	0	0	0	0	0	0	0	0	0	0	0	0.00476826	0	0	0	0	0	0	0	0	0	0	0
Methanocella	0	0	0	0	0	0	0	0	0	0	0.00315776	0	0	0	0	0	0	0.00291239	0	0	0	0	0	0	0	0	0	0.00306204	0	0.00259215	0	0.0039763	0	0	0	0	0	0	0	0.00233514	0	0	0.00344531	0	0	0	0	0	0.0024496
Methanococcoides	0	0	0	0	0	0	0	0	0	0	0	0	0	0	0	0	0	0	0	0	0	0	0	0	0	0	0	0.00306204	0	0.00259215	0	0	0	0.00413496	0.0290529	0	0	0.00476826	0	0	0	0.00305055	0	0	0	0	0	0	0
Methanococcus	0	0	0.00436986	0	0	0	0	0	0	0	0	0.00527065	0	0	0	0	0.004998	0	0	0	0	0	0	0	0	0.00549209	0	0.00612407	0	0	0	0	0	0	0	0	0	0	0	0	0	0	0	0	0	0	0	0	0
Methanocorpusculum	0.0033583	0	0.00436986	0.0033036	0	0.00279861	0	0	0	0	0	0.00527065	0	0	0	0.00429461	0	0	0.00334493	0.00419076	0	0	0	0	0.00378043	0	0.00619771	0	0.00289687	0	0	0	0	0	0	0.004703	0	0	0	0	0	0	0.00344531	0	0	0	0	0.00344828	0.0048992
Methanoculleus	0	0	0	0.0033036	0	0	0	0	0	0	0	0	0	0	0	0	0	0.00291239	0	0	0	0	0	0	0	0.00549209	0	0	0	0	0.00385193	0.0039763	0	0	0	0	0.00622084	0.00476826	0	0	0	0.00610109	0	0	0	0	0	0	0.0024496
Methanofollis	0	0	0.00436986	0.0033036	0	0	0	0	0	0	0	0	0	0	0	0	0	0	0	0	0	0	0.00419533	0	0	0.00549209	0	0.00306204	0	0	0	0	0	0	0	0	0.00622084	0	0	0	0	0	0	0.00343749	0	0	0	0	0.0024496
Methanohalobium	0	0	0	0.0033036	0	0	0.00306673	0	0	0	0	0	0	0	0	0	0	0	0	0	0	0	0	0	0	0	0	0	0	0	0	0	0	0	0	0	0	0	0	0	0	0	0	0	0	0	0	0	0
Methanohalophilus	0	0	0	0	0	0	0	0	0.00420221	0.00391527	0	0	0	0.00283817	0	0	0	0	0	0	0	0	0	0	0	0	0	0	0.00289687	0	0.00385193	0	0	0	0	0	0	0	0.00409702	0	0	0	0	0	0	0	0	0	0
Methanolacinia	0	0.00432732	0	0	0	0	0.00306673	0	0	0	0	0	0	0	0	0	0	0	0	0	0	0	0	0.00313421	0	0.00549209	0	0	0	0	0	0	0	0	0	0	0	0	0.00409702	0	0	0	0	0	0	0	0	0	0
Methanolinea	0	0	0	0	0	0	0	0	0	0	0	0	0	0.00283817	0	0	0	0	0	0	0	0	0	0	0	0.00549209	0	0	0.00289687	0	0	0	0	0	0	0	0	0	0	0	0	0	0	0	0	0	0	0	0
Methanolobus	0	0	0	0	0	0	0	0	0	0	0	0	0	0	0	0	0	0	0	0	0	0	0	0	0	0	0	0	0	0	0	0.0039763	0	0	0	0	0	0	0	0	0	0	0	0	0	0	0	0	0
Methanomassiliicoccus	0.0033583	0	0	0	0	0	0	0	0	0	0	0	0	0.00283817	0	0	0	0	0	0	0	0.00247568	0	0	0.00378043	0	0	0	0.00289687	0	0	0	0	0.00413496	0	0	0	0.00476826	0	0	0	0	0	0	0	0	0	0	0
Methanomethylovorans	0	0	0	0	0	0	0	0	0	0	0	0	0	0	0	0	0	0	0	0	0	0	0	0	0	0	0.00309885	0	0	0	0	0	0	0	0	0	0	0	0	0	0	0	0	0	0	0	0	0	0
Methanoplanus	0	0	0	0	0	0	0	0	0	0	0	0	0	0	0	0	0	0	0	0	0	0	0	0	0	0.00549209	0	0	0	0.00259215	0	0	0	0	0	0	0	0	0	0	0	0.00305055	0	0	0	0	0	0	0
Methanoregula	0	0	0	0.0033036	0	0	0	0	0	0	0.00315776	0	0	0	0	0	0.004998	0	0	0	0	0	0	0	0	0	0	0	0	0	0	0	0	0	0	0	0	0	0	0	0.00323761	0	0	0	0	0	0	0	0
Methanosaeta	0	0	0	0	0	0	0.00306673	0	0	0	0	0	0	0	0	0	0	0	0	0	0	0	0	0	0	0	0.00309885	0	0	0	0	0	0	0	0	0	0	0	0	0	0	0	0	0	0	0	0.00367323	0	0
Methanosalsum	0	0	0	0	0	0	0	0	0	0	0	0	0	0	0	0	0	0	0	0	0	0	0	0	0	0	0	0	0	0	0	0	0	0	0	0	0	0	0	0	0	0	0	0	0	0	0	0	0
Methanosarcina	0	0	0.00873973	0	0	0	0	0.00390701	0	0.00391527	0.00947328	0.00527065	0	0	0	0	0.004998	0.00291239	0.00334493	0.00419076	0.00582445	0	0	0.00313421	0	0	0	0	0	0.00259215	0.00385193	0.0039763	0	0	0.0290529	0	0	0	0	0	0.00323761	0	0.00344531	0	0	0	0.00367323	0	0
Methanosphaera	0	0	0	0	0	0	0	0	0	0	0	0	0	0	0	0	0.004998	0	0	0.171821	0	0	0	0	0	0	0	0	0	0	0.00385193	0	0	0	0	0	0	0	0	0	0	0	0	0	0	0	0	0	0
Methanosphaerula	0	0	0	0	0	0	0	0	0	0	0	0	0	0	0	0	0	0	0	0	0	0	0	0	0	0	0	0	0	0	0	0.0039763	0	0	0	0	0	0	0	0	0	0	0	0	0	0	0	0	0
Methanospirillum	0	0	0	0	0	0	0	0	0	0	0	0	0	0	0	0.00429461	0	0	0	0	0	0	0.00419533	0	0	0	0	0	0	0	0	0	0	0	0	0	0	0	0	0	0	0	0	0	0	0	0	0	0.0024496
Methanothermobacter	0	0	0	0	0	0	0	0	0	0	0	0	0	0	0	0	0	0	0	0	0	0	0	0	0	0	0	0	0	0	0	0	0	0	0	0	0	0	0	0	0	0	0	0	0	0	0	0	0
Methanothermococcus	0	0	0.00436986	0	0	0	0	0	0	0	0	0	0.00434461	0	0	0	0	0	0	0	0	0	0	0	0	0	0	0	0	0	0	0	0	0	0	0	0	0	0	0	0	0	0	0.00343749	0	0	0	0	0
Methanotorris	0	0	0	0	0	0	0	0	0	0	0	0	0	0	0	0	0.004998	0	0	0	0	0	0	0	0	0	0	0	0	0	0	0	0	0	0	0	0	0	0	0	0	0	0	0	0	0	0	0	0.0024496
Methylacidiphilum	0	0	0	0.0033036	0	0	0	0	0	0	0	0	0	0	0	0	0.004998	0	0	0	0	0	0	0	0	0	0	0	0.00289687	0	0	0	0.00613459	0	0	0	0	0.00476826	0	0	0	0	0	0	0	0.0101153	0	0	0
Methylibium	0	0	0	0.0033036	0	0	0	0.00390701	0.00420221	0.00391527	0.00315776	0	0	0	0.00405877	0.00429461	0.004998	0	0	0	0.00582445	0	0.00839067	0.00313421	0	0.00549209	0	0	0.00579374	0	0	0	0	0	0	0	0	0	0.00409702	0.00233514	0.00323761	0.00305055	0.00344531	0	0	0	0	0	0
Methylobacillus	0	0	0	0	0	0	0	0	0	0	0	0	0	0	0	0	0	0	0	0	0	0	0	0	0	0	0	0	0	0	0	0	0	0	0	0	0	0	0	0	0	0	0	0	0	0	0	0	0.0024496
Methylobacterium	0.0033583	0	0.0218493	0.0066072	0	0.00839584	0.00613346	0.00390701	0	0.00783055	0.0252621	0.00527065	0	0.00283817	0.00405877	0	0.009996	0.0174744	0.00334493	0.00838153	0	0.00742703	0.00419533	0.00940262	0	0.00549209	0.00309885	0.00918611	0.0144844	0.00777645	0.00385193	0.0159052	0	0.0124049	0	0.014109	0.0124417	0.00476826	0.0204851	0.0186811	0	0.00915164	0.0172265	0.00343749	0.00527037	0	0.0110197	0.0206897	0.0146976
Methyloceanibacter	0	0	0	0.0066072	0	0	0	0	0	0	0.00315776	0	0	0	0	0	0.004998	0.00291239	0	0	0	0	0	0	0.00378043	0	0.00309885	0	0	0	0.00385193	0.0079526	0	0	0	0.00940601	0	0	0.00409702	0.00233514	0.00323761	0.00305055	0.00689061	0	0	0	0	0	0
Methylocella	0	0	0	0	0	0	0	0	0	0	0	0	0	0	0	0	0	0	0	0	0.00582445	0	0.00419533	0	0	0	0	0	0	0	0	0	0	0	0	0.004703	0	0	0	0	0	0	0.00344531	0	0.00527037	0	0	0	0.0024496
Methylococcus	0	0	0	0	0	0.00279861	0	0	0.00420221	0	0	0	0	0	0	0	0	0	0	0	0.00582445	0	0	0	0	0	0.00309885	0.00306204	0	0	0.00385193	0	0	0	0	0	0.00622084	0	0	0	0	0	0	0	0.00527037	0	0	0	0.0073488
Methylocystis	0	0.00432732	0.00436986	0.0033036	0	0	0.00613346	0.00390701	0.00840442	0.00391527	0	0	0	0	0.00405877	0	0	0.00291239	0.00334493	0	0	0	0.00419533	0	0	0.00549209	0.00309885	0	0.00289687	0.00259215	0.00385193	0.0119289	0	0.00413496	0	0	0	0.00953653	0.00409702	0.00233514	0.00323761	0.00610109	0.0103359	0	0.0105407	0	0.00734646	0	0
Methylomicrobium	0.00671659	0	0.0131096	0.0033036	0.00507434	0.00279861	0	0.00390701	0.00420221	0	0.00315776	0.00527065	0.00434461	0	0	0	0	0.00582479	0.0167246	0	0	0.00247568	0.00419533	0	0	0	0.00309885	0.00306204	0	0	0.00385193	0	0	0	0	0	0	0.00476826	0	0	0	0.00915164	0	0	0	0	0.00367323	0.00344828	0.0024496
Methylomonas	0.00671659	0	0.00436986	0.0099108	0	0	0.0092002	0.00390701	0	0	0	0	0	0.00283817	0.00811754	0.00429461	0.004998	0	0.00334493	0	0	0	0.00419533	0.00313421	0	0.0109842	0.00619771	0.00306204	0.00289687	0.00259215	0	0.0039763	0	0	0	0.004703	0	0	0.00819404	0.00467028	0.00647522	0.00610109	0.00344531	0	0	0	0	0.00344828	0.0073488
Methylophaga	0	0	0	0	0	0	0	0	0.00420221	0	0	0.00527065	0	0	0	0.00858922	0.004998	0.00291239	0.00334493	0.00419076	0	0	0.00419533	0	0.00378043	0	0	0.00306204	0	0.0103686	0	0	0	0	0	0	0	0.00476826	0	0	0	0.00610109	0	0.00687498	0.00527037	0	0	0	0.0024496
Methylophilus	0	0	0	0.0033036	0.00507434	0	0	0.00390701	0	0	0	0	0	0	0	0	0	0.00291239	0	0	0	0.00247568	0.00419533	0	0	0.00549209	0	0	0	0	0	0	0	0.00413496	0	0	0	0	0	0	0	0	0	0	0	0	0	0	0
Methylotenera	0	0	0	0	0	0	0	0	0	0	0	0	0	0	0	0	0	0	0	0	0	0	0	0.00313421	0	0	0	0	0	0	0	0	0	0	0	0	0	0	0	0	0	0.00305055	0	0	0	0	0	0	0
Methyloversatilis	0	0	0	0.0033036	0	0	0	0.00390701	0	0	0	0	0	0	0	0	0	0	0.00334493	0	0	0	0.00419533	0	0	0.00549209	0.00309885	0	0.00289687	0	0	0	0	0	0	0	0	0	0	0	0	0	0	0	0	0	0	0.00344828	0.0024496
Methylovorus	0.0033583	0	0.00436986	0.0066072	0	0	0	0.00390701	0	0	0	0	0	0	0.00405877	0	0	0.00291239	0	0	0.00582445	0.00247568	0.00419533	0.00626841	0	0.0109842	0.00309885	0.00306204	0	0.00259215	0	0.0039763	0	0	0	0	0	0.00476826	0	0	0	0	0	0	0	0	0	0.00344828	0.0073488
Methylovulum	0	0	0	0	0.00507434	0	0	0.00781403	0.00840442	0.00391527	0	0.00527065	0	0	0	0.00429461	0	0	0	0	0	0	0	0	0	0	0.00309885	0.00306204	0	0	0.00385193	0	0	0	0	0	0	0	0	0	0.00323761	0.00305055	0	0.00687498	0	0	0	0.00344828	0
Micavibrio	0	0	0.00436986	0	0	0	0	0	0	0	0	0	0	0.00283817	0	0.00429461	0.004998	0	0	0	0.00582445	0.00247568	0	0	0	0	0	0.00306204	0	0	0	0	0	0	0	0.004703	0	0.00476826	0.00409702	0	0	0.00305055	0	0	0	0	0	0.00344828	0.0024496
Microbacterium	0.0033583	0	0.00873973	0.0198216	0.0101487	0.0111944	0	0.0195351	0.0252133	0.0195764	0.00315776	0.0105413	0	0.00283817	0.0162351	0.0171784	0.02499	0.0203868	0.00668986	0.0125723	0.0116489	0.00247568	0.012586	0.00940262	0.0113413	0.0164763	0.00619771	0	0.023175	0.00777645	0.00770386	0.0079526	0.0122692	0.0206748	0	0.018812	0	0.0143048	0.0204851	0.016346	0	0.0213538	0.0137812	0.0103125	0.0158111	0.0101153	0.0146929	0.0206897	0.0097984
Microbulbifer	0	0	0.0174795	0.0033036	0	0.00279861	0.00306673	0.00390701	0	0.00391527	0.00315776	0.00527065	0	0	0.00405877	0	0	0.00582479	0	0	0.00582445	0	0.00419533	0.00626841	0	0	0.00309885	0	0	0.00259215	0.00385193	0.0039763	0	0	0	0	0.0124417	0	0.00409702	0.00467028	0	0.00305055	0.00344531	0	0	0	0	0	0.0024496
Microcella	0	0	0	0	0	0	0	0	0.0126066	0.00391527	0	0	0	0.00283817	0.00405877	0	0.004998	0.00291239	0	0	0	0	0	0	0.00378043	0	0.00309885	0	0	0	0.00385193	0	0	0	0	0	0	0	0	0.00233514	0	0	0	0	0	0	0	0.0103448	0.0024496
Microchaete	0	0	0	0	0	0	0	0	0	0	0	0	0	0	0	0	0	0	0	0	0	0	0	0	0	0	0	0	0	0	0	0	0	0	0	0	0	0	0	0	0	0	0	0	0	0	0	0	0
Micrococcus	0.00671659	0	0.00873973	0.0066072	0.00507434	0	0.00306673	0.00390701	0.00420221	0.00391527	0.00315776	0	0	0	0.00405877	0	0.009996	0.00582479	0	0.00419076	0	0	0.00419533	0.00626841	0	0	0	0	0.00579374	0.00259215	0.00385193	0	0	0.00413496	0	0.004703	0.00622084	0.00476826	0	0	0.00323761	0	0	0.00687498	0	0	0.00367323	0.00689655	0.0048992
Microcoleus	0	0	0	0	0	0	0	0	0	0	0	0	0	0	0	0	0	0	0	0	0	0	0	0	0	0.00549209	0	0.00306204	0	0	0	0	0	0	0	0	0	0	0	0	0	0	0	0	0	0	0.00367323	0	0.0024496
Microcystis	0	0	0.00436986	0.0033036	0	0	0	0.00781403	0	0	0	0	0	0	0.00405877	0	0	0	0	0	0	0.00247568	0	0	0.00378043	0	0.00309885	0	0.00289687	0.00259215	0.00385193	0.0079526	0.00613459	0.00413496	0	0	0	0	0.00409702	0	0.00323761	0	0.00344531	0	0	0	0	0.00344828	0.0024496
Microlunatus	0	0	0.00436986	0	0	0	0	0	0.00420221	0	0	0.00527065	0	0	0.00405877	0	0.004998	0.00291239	0	0	0.0116489	0	0	0.00313421	0	0.00549209	0	0	0.00579374	0.0051843	0	0.0079526	0	0	0	0.004703	0	0	0	0	0	0	0.00689061	0.00687498	0	0	0.00367323	0.00344828	0
Micromonospora	0.00671659	0	0.0349589	0.0297324	0	0.0111944	0.0092002	0.0156281	0.0336177	0.0313222	0.0157888	0.00527065	0.00868923	0.00567634	0.0405877	0.0171784	0.014994	0.0203868	0.0401391	0.00838153	0.0291223	0.00495135	0.0167813	0.015671	0.00378043	0.0274605	0.0123954	0.00612407	0.0144844	0.00777645	0.0192597	0.0198815	0.0184038	0.00413496	0	0.014109	0.0248834	0.0286096	0.0286791	0.0210163	0.00971282	0.0244044	0.0241171	0.0103125	0.00527037	0.0303459	0.0110197	0.0241379	0.0220464
Microterricola	0	0	0.0174795	0	0	0.00559722	0.00306673	0.00390701	0.00840442	0	0.00315776	0.0105413	0	0.00567634	0.00405877	0	0.004998	0.00873718	0.00668986	0	0.00582445	0.00247568	0	0	0	0	0.00309885	0	0	0.0051843	0	0.0039763	0.0122692	0	0	0	0.00622084	0.00953653	0.00409702	0.00467028	0.00323761	0.00915164	0.00344531	0.00343749	0	0	0.00367323	0	0.0024496
Mimivirus	0	0	0	0	0	0	0	0	0	0	0	0	0	0	0	0	0	0	0	0	0	0	0	0	0	0	0	0	0	0	0	0	0	0	0	0	0	0	0	0	0	0	0	0	0	0	0	0	0
Mitsuaria	0	0	0.00873973	0.0066072	0	0.00559722	0.00306673	0	0.00420221	0.00783055	0	0	0	0	0	0.00858922	0	0.00582479	0.00668986	0	0.00582445	0	0	0.00313421	0	0.0164763	0.00929656	0	0.00289687	0.0051843	0.00385193	0	0	0	0	0.004703	0	0	0.0122911	0.00233514	0.00323761	0.00610109	0.00344531	0	0	0	0.00367323	0	0.0024496
Mobiluncus	0.0033583	0.00432732	0.0131096	0	0	0.00839584	0.00306673	0.00781403	0.00840442	0.00783055	0.00631552	0	0.0130338	0	0.0162351	0.00858922	0.004998	0.00873718	0	0.00419076	0.00582445	0	0.00419533	0.00940262	0.00756086	0.00549209	0.00309885	0	0	0.00777645	0.00770386	0.0039763	0	0.00413496	0	0.004703	0.0124417	0.0190731	0.0122911	0.00233514	0.00323761	0.00610109	0	0	0.00527037	0	0.00367323	0.0103448	0.0097984
Modestobacter	0	0	0.00873973	0	0	0	0	0	0	0	0.00315776	0	0	0.00283817	0	0	0	0.00291239	0	0	0	0.00247568	0	0	0	0	0	0	0	0	0	0.0039763	0	0	0	0	0	0.00476826	0	0	0	0	0	0	0	0	0	0	0.0024496
Mogibacterium	0.0738825	0.0476005	0.00436986	0.0231252	0	0.00279861	0.0092002	0.0273491	0.100853	0.00783055	0.00631552	0.0316239	0	0.0113527	0.0202939	0.00429461	0.019992	0.014562	0.0535189	0.117341	0.0291223	0.00247568	0.025172	0.0407447	0.00378043	0.0164763	0.00619771	0.00306204	0.0260718	0.0388823	0.0192597	0.0119289	0.00613459	0.00413496	0	0.018812	0.0124417	0.00476826	0.0327761	0.00934056	0.0129504	0.0213538	0.0172265	0.00687498	0.0263518	0.0101153	0.00367323	0.00689655	0.0146976
Molluscipoxvirus	0	0	0	0	0	0	0	0	0	0	0	0	0	0	0	0	0	0	0	0	0	0	0	0	0	0	0	0	0	0	0	0	0	0	0	0	0	0	0	0	0	0	0	0	0	0	0	0	0
Mooglevirus	0	0	0	0	0	0	0	0	0	0	0	0	0	0	0	0	0	0	0	0	0	0	0	0	0	0	0	0	0	0	0	0	0	0	0	0	0	0	0	0	0	0	0	0	0	0	0	0	0
Moonvirus	0	0	0	0	0	0	0	0	0	0	0	0	0	0	0	0	0	0	0	0	0	0	0	0	0	0	0	0	0	0	0	0	0	0	0	0	0	0	0	0	0	0	0	0	0	0	0	0	0
Moorea	0.00671659	0	0.00436986	0	0.00507434	0.0111944	0.00306673	0	0	0	0.00315776	0.00527065	0	0	0	0.00429461	0	0.00873718	0.00334493	0	0	0.00990271	0.00419533	0.00313421	0	0	0.00309885	0.00306204	0.00289687	0.0051843	0	0.0039763	0	0.00413496	0	0	0	0.00476826	0	0.0116757	0	0.00305055	0.00689061	0	0	0	0	0.00344828	0.0097984
Moorella	0.0033583	0	0.0174795	0	0	0.00559722	0	0.00390701	0	0	0.00315776	0	0.00434461	0.00283817	0	0	0	0.00582479	0.00334493	0	0.00582445	0.00247568	0	0	0	0.0109842	0.00619771	0	0.00579374	0.0051843	0	0	0.00613459	0.00413496	0	0	0	0.00476826	0	0	0	0.00610109	0.00344531	0	0	0	0.00367323	0.00689655	0.012248
Moraxella	0	0.00432732	0	0	0	0	0	0	0.00420221	0	0.00631552	0	0	0	0	0	0	0	0	0	0.00582445	0	0	0	0	0	0	0	0	0	0	0	0	0.00413496	0	0	0	0	0	0	0	0.00305055	0	0	0	0	0	0	0
Morganella	0	0	0	0	0	0	0	0	0.00420221	0	0	0	0.117305	0	0	0	0.009996	0	0	0	0	0	0	0	0	0.0109842	0.00309885	0	0.00289687	0	0	0.0039763	0	0	0	0	0	0	0	0	0	0	0	0	0	0	0	0.00344828	0.0024496
Moritella	0	0	0	0	0	0	0	0	0	0	0	0	0	0	0	0	0	0	0	0	0	0	0	0	0	0	0	0	0	0	0	0	0	0	0	0	0	0	0.00409702	0	0	0	0	0	0	0	0	0	0
Mucilaginibacter	0.00671659	0.00432732	0.0131096	0.0066072	0.00507434	0.00839584	0.00613346	0.00390701	0.0210111	0	0.00315776	0.00527065	0.00434461	0	0.00811754	0.00429461	0.004998	0	0.0100348	0.00419076	0	0.00990271	0.00419533	0.00940262	0.00378043	0.0109842	0.0123954	0.00918611	0.00579374	0.00777645	0.00385193	0.0079526	0.00613459	0.00826993	0.0290529	0.004703	0	0.00476826	0.00409702	0.00233514	0.00323761	0.00915164	0	0.00343749	0	0.0101153	0	0.0103448	0.0073488
Mucinivorans	0	0.00432732	0	0	0.00507434	0.00559722	0	0	0.0126066	0	0.00315776	0	0	0.00283817	0	0	0.019992	0.00582479	0.00334493	0	0.00582445	0	0	0.00313421	0.00378043	0.00549209	0.00619771	0.00612407	0.00289687	0	0	0	0.00613459	0.00413496	0	0.004703	0	0.00476826	0.00819404	0.00233514	0.00971282	0.0122022	0.00344531	0.00343749	0.00527037	0	0.00367323	0.0103448	0.0048992
Murdochiella	0.0033583	0	0.0786576	0.016518	0.0101487	0.0307847	0	0.00390701	0.0168088	0.0234916	0.00947328	0.0316239	0.0217231	0.0141908	0.0162351	0.0257677	0.044982	0.0203868	0.0234145	0.0377169	0.0116489	0.0123784	0.00419533	0.0219394	0.0189022	0.0384446	0.00619771	0.00306204	0.0260718	0.0155529	0	0.0039763	0	0	0	0.023515	0.0435459	0.00953653	0.0163881	0.0140108	0.00647522	0.00915164	0.00344531	0.01375	0.00527037	0	0.0220394	0.00689655	0.0195968
Muricauda	0	0	0	0	0	0.00279861	0.00306673	0	0	0.00391527	0.00315776	0	0.00434461	0	0	0	0	0	0	0	0	0	0	0	0	0.00549209	0	0.00306204	0	0	0	0.0039763	0	0	0	0	0	0	0.00409702	0.00233514	0	0	0	0	0	0	0	0	0.0024496
Muvirus	0	0	0	0	0	0	0	0	0	0	0	0	0.0521354	0	0	0	0	0	0	0	0	0	0	0	0	0	0	0	0	0	0	0	0	0	0	0	0	0	0	0	0	0	0	0	0	0	0	0	0
Mycobacterium	0.0268664	0	0.0699178	0.0396432	0	0.0251875	0.0153337	0.0273491	0.0462243	0.0469833	0.012631	0.0474358	0.0130338	0.017029	0.0243526	0.0171784	0.044982	0.0320363	0.046829	0.0167631	0.0465956	0.0222811	0.0209767	0.0344763	0.00756086	0.060413	0.0309885	0.0214343	0.0347625	0.0207372	0.00770386	0.0516919	0.0552113	0.0165399	0.0290529	0.0517331	0.0497667	0.0524509	0.0614553	0.0467028	0.0129504	0.0549099	0.0275624	0.01375	0.0737852	0.0202306	0.0257126	0.0206897	0.0465424
Mycoplasma	0.0100749	0	0	0.0066072	0.0101487	0.00559722	0	0.011721	0.0168088	0	0.0157888	0.00527065	0.0130338	0	0.00405877	0.00858922	0.014994	0.00582479	0.00334493	0	0.00582445	0	0.00419533	0.00626841	0.00378043	0.0164763	0.0247908	0.00612407	0.0115875	0.0129608	0.0115558	0.0039763	0.0184038	0.0330797	0.0290529	0.00940601	0	0.0238413	0.00409702	0.00700542	0.00971282	0.00305055	0	0.00687498	0	0.0101153	0.00367323	0	0.0024496
Myroides	0.0134332	0	0.00436986	0.0033036	0	0.00559722	0.00306673	0.011721	0	0.00391527	0.00947328	0	0	0.0085145	0.0121763	0	0.004998	0.00291239	0.00668986	0	0	0.00495135	0	0.00940262	0.00378043	0.00549209	0	0.00918611	0.0144844	0.0103686	0.00770386	0.0079526	0.0122692	0.00826993	0	0.004703	0	0	0	0.00233514	0.00971282	0	0.00344531	0.00343749	0.0105407	0	0.0110197	0.0137931	0.0024496
Myxococcus	0.0033583	0	0.0262192	0.0099108	0	0.00559722	0.0092002	0.0156281	0.0252133	0.0117458	0.00631552	0.0105413	0.00434461	0.0085145	0.0121763	0.00429461	0.004998	0.014562	0.0100348	0.0125723	0	0.00247568	0.0167813	0.00940262	0.00378043	0.00549209	0.0185931	0.00612407	0.00869061	0.0051843	0	0.0159052	0	0.00413496	0	0	0	0.0190731	0.0286791	0.0140108	0.00971282	0.00305055	0.00344531	0	0	0	0.00734646	0.0241379	0.0073488
N15virus	0	0	0	0	0	0	0	0	0	0	0	0	0	0	0	0	0	0	0	0	0	0	0	0	0	0	0	0	0	0	0	0	0	0	0	0	0	0	0	0	0	0	0	0	0	0	0	0	0
N4virus	0	0	0	0	0	0	0	0	0	0	0	0	0	0	0	0	0	0	0	0	0	0	0	0	0	0	0	0	0	0	0	0	0	0	0	0	0	0	0	0	0	0	0	0	0	0	0	0	0
Nakamurella	0	0	0.0131096	0.0066072	0	0	0	0	0	0.00391527	0.00315776	0	0	0	0.0121763	0	0.009996	0	0.00334493	0	0.0116489	0	0.00419533	0.00313421	0	0	0	0	0.00289687	0	0.00385193	0.0039763	0.0184038	0	0	0	0	0	0.00409702	0.00467028	0.00323761	0.00610109	0	0	0.0105407	0	0	0.00344828	0.0097984
Natranaerobius	0	0	0.00436986	0	0.00507434	0	0.00306673	0	0	0	0	0	0	0.00283817	0	0.00858922	0	0.00291239	0	0	0	0	0	0	0	0	0	0	0.00289687	0.00259215	0	0	0	0	0	0	0	0	0.00409702	0.00233514	0	0	0.00344531	0	0	0	0.00367323	0	0.0073488
Natrialba	0	0	0	0.0033036	0	0	0	0	0	0	0	0	0	0.00283817	0	0	0	0	0.00334493	0	0	0	0	0	0	0	0	0	0.00289687	0	0	0.0039763	0	0	0	0.004703	0	0	0.00409702	0	0	0	0	0.00343749	0.00527037	0	0	0	0
Natrinema	0	0	0	0	0	0	0	0	0	0	0	0	0	0	0	0	0	0	0	0	0	0	0	0	0	0	0	0	0	0	0	0	0	0	0	0	0	0	0	0	0	0	0	0	0	0	0	0	0
Natronobacterium	0	0	0	0	0	0	0	0	0	0	0.00315776	0	0	0	0	0	0	0	0	0	0	0	0	0	0	0	0	0	0	0	0	0	0	0	0	0	0	0	0	0	0	0	0	0	0	0	0	0	0
Natronococcus	0	0	0	0	0	0	0	0	0	0	0	0	0	0	0	0	0	0	0	0	0	0	0	0	0	0	0	0	0.00289687	0	0	0	0	0	0.0290529	0	0.00622084	0	0	0	0	0	0	0	0	0	0	0	0
Natronomonas	0	0	0	0.0066072	0	0	0	0	0.00420221	0	0	0	0	0	0	0	0	0	0	0	0	0	0.00419533	0.00313421	0	0	0	0	0	0	0	0	0	0	0	0	0	0	0	0.00233514	0	0	0	0.00343749	0	0	0	0	0
Nautilia	0	0	0	0	0	0	0	0	0	0	0	0	0	0	0	0	0	0	0	0	0.00582445	0	0	0	0	0	0	0	0	0	0	0	0	0.00413496	0	0	0	0	0	0	0	0	0	0	0	0	0	0	0
Ndongobacter	0.00671659	0	0.0131096	0.0033036	0	0	0	0.00390701	0	0.0156611	0.00315776	0	0.0173785	0.00283817	0	0	0	0	0	0.00419076	0	0.00247568	0.00839067	0	0	0.0109842	0.00619771	0.00306204	0.00579374	0.00259215	0.00385193	0	0	0.00413496	0	0.014109	0	0.00953653	0.00409702	0.00233514	0	0.00305055	0	0	0.00527037	0	0.00734646	0.00344828	0.0097984
Negativicoccus	0.00671659	0	0.00436986	0.0066072	0	0.0111944	0.00306673	0	0	0.00391527	0.00315776	0	0	0.0085145	0.00405877	0	0.004998	0	0.00334493	0.00838153	0.00582445	0.00247568	0.00839067	0.00313421	0	0	0.00309885	0.00612407	0.00579374	0.0051843	0.00385193	0	0	0.00413496	0	0.00940601	0	0	0	0.00467028	0	0	0	0	0.0105407	4.41028	0.00367323	0.00344828	0.0073488
Neisseria	0.0100749	1.44532	0.0174795	0.0198216	0.015223	0.00559722	0.00613346	0.0195351	0.0294155	0.0234916	0.0189466	0	0.00434461	0.0085145	0.0121763	0.0171784	0.014994	0.014562	0.0100348	0.00838153	0.0232978	0.00990271	0.0293673	0.0250737	0.0151217	0.0274605	0.0247908	0.00306204	0.0260718	0.0103686	0.00770386	0.0159052	0.0122692	0.0330797	0	0.014109	0.00622084	0.0190731	0.0245821	0.0186811	0.0615146	0.0152527	0.0103359	0.0103125	0.0158111	0.0101153	0.00367323	0.0241379	0.0146976
Neoasaia	0.0033583	0	0.00436986	0.0066072	0	0.00279861	0.00306673	0	0.00420221	0.00391527	0	0	0	0	0	0.00429461	0	0.00291239	0.00334493	0.00419076	0.00582445	0	0.00419533	0.00626841	0	0.00549209	0.00309885	0.00306204	0.00289687	0	0.00770386	0	0	0	0	0.004703	0	0	0.0122911	0	0	0.00305055	0.00344531	0	0	0	0.00367323	0	0.0024496
Neomicrococcus	0	0	0.00436986	0	0	0	0	0	0	0	0	0	0	0	0	0	0	0.00291239	0	0	0	0	0.00419533	0	0	0	0	0	0	0	0	0	0	0	0	0	0	0	0	0	0	0.00305055	0	0	0	0	0.00734646	0	0
Neorhizobium	0.0033583	0	0	0.0066072	0.00507434	0	0	0	0.0126066	0	0	0	0	0.00283817	0	0	0	0.00582479	0.00334493	0	0	0	0.00839067	0	0.00378043	0.00549209	0	0.00612407	0.00579374	0	0	0	0	0.00413496	0	0.004703	0	0.00953653	0	0	0	0.00610109	0	0.00343749	0.00527037	0	0.00734646	0.00344828	0.0024496
Neorickettsia	0	0	0	0	0	0	0	0	0	0	0	0	0	0	0	0	0	0	0	0	0	0	0	0	0	0	0	0	0	0	0	0	0	0	0	0	0	0	0	0	0	0	0	0	0	0	0	0	0
Niabella	0.00671659	0	0.00436986	0	0.00507434	0.00839584	0.00306673	0	0	0	0.00315776	0.00527065	0	0.00283817	0.00811754	0	0	0.00291239	0.00334493	0.00419076	0	0.00742703	0.00419533	0.00313421	0.00378043	0.00549209	0	0.00306204	0.00579374	0	0	0.0079526	0	0	0	0.004703	0	0.00476826	0.00409702	0.00700542	0	0.00305055	0.00344531	0	0	0	0	0	0.0073488
Niastella	0	0	0	0	0	0	0	0.00390701	0.0126066	0.00391527	0	0	0	0	0.00405877	0	0	0	0	0.00419076	0	0	0.00419533	0	0	0	0	0.00306204	0.00579374	0	0	0	0	0	0	0	0.00622084	0.00476826	0.0122911	0.00233514	0	0.00305055	0	0	0	0	0	0	0
Nit1virus	0	0	0	0	0	0	0	0	0	0	0	0	0	0	0	0	0	0	0	0	0	0	0	0	0	0	0	0	0	0	0	0	0	0	0	0	0	0	0	0	0	0	0	0	0	0	0	0	0
Nitratifractor	0	0	0.00873973	0	0	0	0	0.00390701	0.00420221	0.00391527	0.00315776	0	0	0	0.00405877	0	0	0.00582479	0.00334493	0	0	0	0	0	0	0	0	0.00306204	0	0	0	0	0	0	0	0	0	0.00953653	0	0	0	0.00305055	0.00344531	0	0.00527037	0	0	0	0
Nitratireductor	0	0	0	0	0	0	0	0	0	0	0	0	0	0	0	0	0	0	0	0	0	0	0	0	0	0	0.00309885	0	0	0	0	0	0	0	0	0	0	0	0	0	0	0.00305055	0	0	0	0	0	0.00344828	0.0024496
Nitratiruptor	0.0033583	0	0	0	0	0	0	0	0	0	0	0	0	0	0	0	0	0	0	0	0	0	0	0	0	0	0	0	0	0	0	0	0	0	0	0	0	0	0	0	0	0	0	0	0	0	0	0	0
Nitrobacter	0	0	0.00436986	0.0033036	0	0.00279861	0	0.00390701	0.00420221	0.00391527	0.00315776	0	0	0	0.00405877	0	0.004998	0.00291239	0	0	0	0	0	0.00313421	0	0.00549209	0	0	0.00579374	0.00259215	0	0	0.00613459	0	0	0	0	0	0.00409702	0.00233514	0.00323761	0.00305055	0	0	0	0	0	0	0.0024496
Nitrosococcus	0	0	0	0	0	0	0.00306673	0.00390701	0.00420221	0.00391527	0	0	0	0	0.00405877	0	0.004998	0	0	0	0	0	0	0	0	0.00549209	0	0	0	0	0	0.0039763	0	0	0	0	0	0.00476826	0.00409702	0	0	0	0	0	0	0	0	0	0
Nitrosomonas	0.0033583	0	0.00436986	0	0	0	0	0.00390701	0.00840442	0	0	0.00527065	0	0	0	0	0	0	0	0.00419076	0	0	0	0	0	0	0.00619771	0.00306204	0	0.00259215	0	0	0	0	0	0	0.00622084	0.00476826	0.00409702	0.00233514	0	0.00305055	0	0	0.00527037	0	0	0	0.0024496
Nitrosopumilus	0	0	0	0	0	0	0	0	0	0	0	0	0	0	0	0	0	0	0	0	0	0	0	0	0	0	0	0	0	0	0	0	0	0	0	0	0	0	0	0	0	0	0	0	0	0	0	0	0
Nitrososphaera	0	0	0	0	0	0	0	0	0	0	0	0	0	0	0	0	0	0	0	0	0	0	0	0	0	0	0	0	0	0	0	0	0	0	0	0	0	0	0	0	0	0	0	0	0	0	0	0	0
Nitrosospira	0.0033583	0	0	0	0.00507434	0	0	0	0	0	0.00315776	0	0	0	0	0.00429461	0.004998	0.00291239	0	0	0.00582445	0.00247568	0.00839067	0	0	0	0	0.00612407	0	0.0051843	0.00385193	0	0	0	0	0	0	0.00476826	0	0.00233514	0	0	0.00344531	0	0	0	0	0	0.0024496
Nitrospira	0	0.00432732	0.00436986	0.0033036	0	0	0.00306673	0.011721	0.00420221	0.00391527	0.00947328	0.00527065	0	0	0.00405877	0.00429461	0.009996	0.00291239	0	0	0.00582445	0	0.00419533	0.00313421	0	0.00549209	0.00309885	0.00306204	0	0	0.00385193	0	0.00613459	0	0	0	0	0	0.00819404	0	0.00323761	0	0.00344531	0	0	0	0.00367323	0.00344828	0.0048992
Nitrospirillum	0	0	0.00436986	0	0.00507434	0	0	0.00390701	0	0	0	0	0	0	0.00811754	0	0.009996	0	0	0	0.00582445	0	0	0.00626841	0	0	0.00309885	0	0.00289687	0.00259215	0	0.0039763	0	0	0	0.004703	0	0	0	0.00233514	0	0.00305055	0.00344531	0	0	0	0	0	0
Nocardia	0	0	0	0.0066072	0.00507434	0	0.00306673	0.00781403	0.00840442	0.0117458	0.00631552	0	0.00434461	0.00283817	0.0121763	0.00429461	0.004998	0.00582479	0.0100348	0	0	0	0.012586	0.00313421	0.00378043	0.00549209	0.0185931	0.00612407	0.00289687	0.0051843	0.00770386	0	0.0122692	0.00826993	0	0.004703	0	0.00476826	0.0245821	0.00467028	0.00647522	0.0122022	0.0137812	0.00343749	0.0158111	0	0.00734646	0.00689655	0.012248
Nocardioides	0.0033583	0	0.00873973	0.0099108	0	0	0	0.00390701	0	0	0.00315776	0	0	0	0.00405877	0	0.009996	0.00582479	0	0.00419076	0.0174734	0.00247568	0.00419533	0.00313421	0.00378043	0	0	0	0.00579374	0.00259215	0	0.0079526	0.0122692	0.00413496	0	0	0	0.00476826	0	0.00233514	0.00647522	0.00915164	0.00344531	0	0	0	0	0.0103448	0
Nocardiopsis	0	0	0.0218493	0	0	0.00839584	0.00306673	0	0.00420221	0	0.00631552	0	0	0	0.0162351	0	0.009996	0.00582479	0.00668986	0	0.0174734	0.00247568	0.00419533	0.00313421	0	0.00549209	0.00309885	0	0.00869061	0	0.00385193	0.0159052	0.0122692	0	0	0	0.00622084	0.00476826	0.00409702	0.00233514	0.00647522	0	0.0103359	0	0	0	0.00367323	0.00689655	0.0073488
Nodularia	0	0	0	0	0	0	0	0	0	0	0	0	0	0	0	0	0	0	0	0	0	0	0	0	0	0	0	0	0	0	0	0	0	0	0	0	0	0	0	0	0	0	0	0	0	0	0	0	0
Nonanavirus	0	0	0	0	0	0	0	0	0	0	0	0	0	0	0	0	0	0	0.00334493	0	0	0	0	0	0	0	0	0	0	0	0	0	0	0	0	0	0	0	0	0	0	0	0	0	0	0	0	0	0
Nonlabens	0	0	0	0.0033036	0	0.00279861	0	0	0.00420221	0	0	0	0	0	0	0	0.004998	0	0.00334493	0	0	0	0	0	0.00378043	0.0109842	0	0	0	0	0	0.0039763	0	0	0	0.004703	0	0	0	0.00233514	0	0	0	0	0.00527037	0	0	0	0
Nonomuraea	0	0	0.00873973	0.0066072	0	0.00279861	0	0.00390701	0.00420221	0	0.00315776	0	0	0	0.00405877	0	0.004998	0.00291239	0.00334493	0.00419076	0	0	0	0	0	0.0109842	0.00309885	0	0.00869061	0.00259215	0	0.0039763	0	0	0	0	0	0	0.00819404	0.00700542	0	0.00305055	0	0	0	0	0	0	0.0048992
Nostoc	0	0	0.00873973	0.0033036	0.0101487	0.00559722	0.00613346	0.00781403	0.00840442	0	0.00947328	0.00527065	0.00434461	0.00283817	0	0	0.004998	0	0	0	0.00582445	0	0	0	0.00378043	0.0109842	0.00309885	0.00306204	0	0.0051843	0	0.0119289	0.00613459	0	0	0	0.00622084	0.00476826	0.00819404	0.00467028	0.00647522	0.00305055	0	0	0.00527037	0	0	0.0137931	0.0048992
Novibacillus	0	0	0	0	0	0	0	0	0	0	0	0	0	0	0	0	0	0	0.00334493	0	0	0	0	0.00313421	0	0	0	0	0	0	0	0	0	0	0	0	0	0	0	0	0	0.00305055	0	0	0	0	0	0	0
Novosphingobium	0.00671659	0	0	0.0033036	0	0	0.00613346	0	0.00840442	0	0	0	0	0	0	0	0	0.00582479	0	0	0.00582445	0.00247568	0	0.00940262	0	0	0.00309885	0.00306204	0	0.00259215	0.00770386	0.0039763	0.00613459	0	0	0.00940601	0	0	0.00819404	0.00233514	0	0	0.0103359	0.00343749	0	0	0.00734646	0.00344828	0.0024496
Obesumbacterium	0	0	0	0	0	0	0.00306673	0	0	0	0	0	0	0	0	0	0	0	0	0	0.00582445	0	0	0	0	0	0	0.00306204	0	0	0.00385193	0	0	0	0	0.004703	0.00622084	0.00476826	0	0.00233514	0	0	0	0.0240624	0	0	0	0.00689655	0.0024496
Oblitimonas	0	0	0	0	0.00507434	0	0	0	0.00420221	0	0	0	0	0	0	0.00429461	0.004998	0.00291239	0.00334493	0	0	0.00247568	0	0	0.00378043	0.00549209	0	0.00306204	0	0	0.00385193	0	0	0	0	0	0	0.00476826	0.00409702	0	0	0	0	0	0	0	0	0	0
Oceanicoccus	0	0	0	0	0	0	0	0.00390701	0	0	0	0	0	0	0	0	0	0.00291239	0	0	0.00582445	0	0	0	0	0	0	0	0	0	0	0	0	0	0	0	0	0	0	0	0	0	0.00344531	0	0	0	0	0	0
Oceanimonas	0	0	0.0131096	0.0033036	0	0.00279861	0.00613346	0.00781403	0.0126066	0	0.00315776	0	0.00434461	0.00567634	0.00405877	0	0	0.00291239	0.00334493	0	0	0	0	0.00313421	0	0	0.00619771	0	0.00289687	0.00259215	0	0.0039763	0	0	0	0	0.0124417	0.00476826	0	0	0.00323761	0.00305055	0.00344531	0	0	0	0.00734646	0.0103448	0.0073488
Oceanisphaera	0	0	0.00436986	0	0	0	0	0	0	0	0.00315776	0	0	0	0.00405877	0	0.004998	0	0	0	0	0	0.012586	0	0	0.00549209	0	0	0	0	0	0	0	0	0	0	0	0	0	0	0	0	0.00344531	0	0	0.0101153	0	0	0
Oceanithermus	0	0	0.00436986	0	0.00507434	0	0.00306673	0.00781403	0.00420221	0	0	0.00527065	0	0.00283817	0.00405877	0.00429461	0	0.00582479	0.00334493	0	0	0	0.0167813	0.00626841	0	0	0.00309885	0.00306204	0.00579374	0.00259215	0.0115558	0.0119289	0	0	0	0.00940601	0	0.00476826	0.00819404	0.00233514	0	0.00915164	0.00344531	0	0	0	0	0.00689655	0
Oceanobacillus	0	0	0	0.0066072	0	0	0	0.00390701	0	0	0	0	0	0	0.00405877	0	0.004998	0.00582479	0.00334493	0	0	0	0.00419533	0	0	0.0109842	0	0.00306204	0	0	0	0	0	0.00413496	0	0	0	0	0	0.00233514	0	0.00305055	0	0	0.0105407	0	0	0	0
Ochrobactrum	0	0	0.00436986	0	0.00507434	0.00559722	0	0.011721	0	0.00391527	0.00315776	0	0.00434461	0.00283817	0.00811754	0	0	0	0.00334493	0.00838153	0.0116489	0.00495135	0.0167813	0.00313421	0.0113413	0	0.00309885	0.00306204	0.00579374	0.0051843	0	0.0119289	0.00613459	0.00413496	0	0.004703	0.0124417	0.00953653	0.00819404	0	0.00971282	0.00610109	0	0.00687498	0.00527037	0	0	0.00344828	0.0024496
Octadecabacter	0	0	0	0	0	0	0	0	0	0	0	0	0	0	0	0	0	0	0	0	0	0	0	0.00313421	0	0	0	0	0	0	0	0	0	0	0	0	0	0	0	0	0	0	0.00344531	0	0	0	0	0	0
Odoribacter	6.3136	0.0216366	1.56878	7.54542	0.106561	5.66439	7.6331	3.16859	2.48771	4.81579	4.84085	0.0948717	0.0434461	5.9715	2.26885	0.257677	0.834666	3.81524	6.65641	0.209538	4.74693	0.173297	1.42641	1.51696	8.20732	0.697496	1.73226	6.02915	4.69293	6.01897	2.45753	0.238578	0.325133	0.0661594	0	0.206932	0.143079	0.0762922	4.96968	5.26574	0.291385	0.338611	4.79587	0.0206249	4.20048	0	0.0697914	0.186207	3.31431
Oenococcus	0	0	0	0	0	0	0	0.00390701	0	0	0	0	0	0	0.00405877	0	0	0	0.00668986	0	0.00582445	0.00247568	0.00419533	0	0.00378043	0	0	0	0	0.00259215	0	0.0039763	0	0.00413496	0	0	0	0	0	0	0	0.00305055	0	0.00343749	0	0	0	0	0
Oleiphilus	0	0	0	0	0	0	0	0	0	0	0	0	0	0	0	0	0.004998	0	0	0	0	0	0	0.00313421	0	0.00549209	0	0	0	0	0	0	0	0	0	0	0	0	0	0	0	0	0	0	0	0	0	0	0
Oleispira	0	0	0	0	0	0	0	0	0	0	0	0	0	0	0	0	0	0	0	0	0	0	0	0	0.00378043	0	0	0	0	0	0	0	0	0	0	0	0	0	0	0	0	0	0	0	0	0	0	0.00344828	0
Oligotropha	0	0	0	0.0033036	0	0	0	0.00390701	0	0	0.00315776	0.00527065	0	0	0	0.00858922	0	0	0	0	0	0	0.00839067	0	0	0	0	0	0	0	0	0	0	0.00413496	0	0	0	0.00476826	0	0.00233514	0	0	0	0	0	0.0101153	0	0	0
Olsenella	0.161198	0.0259639	0.485055	0.277502	0.0761151	0.0335833	0.0368008	0.171909	0.268941	0.2819	0.18315	0.0527065	0.156406	0.0624397	0.312525	0.210436	0.204918	0.157269	0.234145	0.234683	0.0931912	1.87656	0.167813	0.184918	0.189022	0.774385	0.185931	0.0551167	0.234647	0.0803567	1.30966	0.174957	0.153365	0.0248098	0	0.315101	0.0808709	0.262254	0.327761	0.184476	0.265484	0.292853	0.189492	0.0378124	0.295141	2.30629	0.11387	0.258621	0.203317
Opitutus	0.00671659	0	0.00436986	0.0066072	0	0.00559722	0.00613346	0	0.0126066	0.0156611	0.00315776	0	0	0	0.00811754	0.00858922	0.009996	0.0116496	0	0.00419076	0	0	0.00419533	0.00940262	0	0	0.00929656	0.00612407	0.00289687	0.00777645	0.00770386	0.0119289	0	0	0	0.004703	0	0.00476826	0.00409702	0.0116757	0	0.00610109	0.0103359	0.0103125	0.0158111	0	0.00734646	0.0103448	0.0073488
Orientia	0	0	0	0.0033036	0.00507434	0	0	0	0	0.00391527	0	0	0	0	0	0.00429461	0	0	0	0	0	0	0	0	0	0	0.00619771	0	0.00289687	0	0.00385193	0	0	0.00413496	0	0	0	0	0.00409702	0	0	0	0	0	0.00527037	0	0	0	0.0024496
Ornithobacterium	0.0033583	0.0865464	0	0.0231252	0	0	0.00613346	0.0351631	0.0168088	0	0.0252621	0	0.0130338	0	0.00811754	0.0515353	0.004998	0.0262116	0.0100348	0.00419076	0	0.00247568	0.00419533	0.00940262	0.0642674	0.060413	0.00929656	0	0.0144844	0.0181451	0.0154077	0.0318104	0.0122692	0.00413496	0	0	0	0	0.0122911	0.0140108	0.00323761	0.00305055	0	0	0.00527037	0	0.00367323	0.0206897	0.0024496
Orthohantavirus	0	0	0	0	0	0	0	0	0	0	0	0	0	0	0	0	0	0	0	0	0	0	0	0	0	0	0	0	0	0	0	0	0	0	0	0	0	0	0	0	0	0	0	0	0	0	0	0	0
Orthopoxvirus	0	0	0	0	0	0	0	0	0	0	0	0	0	0	0	0	0	0	0	0	0	0	0	0	0	0	0	0	0	0	0	0	0	0	0	0	0	0	0	0	0	0	0	0	0	0	0	0	0
Oscillatoria	0.0033583	0	0.00436986	0.0033036	0	0	0	0	0.00420221	0.00783055	0	0	0	0	0	0.00858922	0.004998	0.00291239	0.00334493	0	0	0	0	0.00313421	0	0	0.00309885	0	0	0	0	0	0	0.00413496	0	0.004703	0	0	0.00819404	0	0.00323761	0	0.00689061	0	0	0	0	0.00689655	0.0024496
Oscillibacter	0.0705242	0.00432732	0.594302	0.267592	0.0101487	0.307847	0.236138	0.30084	0.432828	0.438511	0.353669	0.0263532	0.0434461	0.102174	0.332819	0.107365	0.269892	0.227167	0.173936	0.134104	0.36694	0.0594162	0.356603	0.219394	0.0529261	0.203207	0.337775	0.238839	0.309965	0.318835	0.312006	0.385701	0.0490767	0.0289448	0	0.0752481	0.136858	0.13828	0.409702	0.305903	0.119791	0.338611	0.22739	0.0653123	0.121219	0.0101153	0.308551	0.351724	0.413982
Ottowia	0	0	0.00436986	0	0	0.00279861	0	0	0	0.00391527	0.00315776	0	0.00434461	0.00567634	0	0	0	0.00582479	0.00334493	0	0	0	0	0	0	0	0	0	0.00289687	0	0	0.0039763	0	0	0	0	0	0.00476826	0.00409702	0	0	0	0	0.00343749	0	0	0.00734646	0.00344828	0
Owenweeksia	0	0	0.00436986	0.0033036	0	0.00279861	0	0	0.00840442	0.00391527	0	0	0	0	0	0	0	0	0	0	0	0.00247568	0.00419533	0	0	0	0.00619771	0.00306204	0	0	0	0	0	0	0	0	0	0	0	0	0	0	0	0	0	0	0	0	0
Oxalobacter	0.00671659	0	0.00436986	0	0	0.00839584	0	0.00781403	0.00420221	0	0.00315776	0.00527065	0	0	0.00405877	0	0.009996	0	0.00334493	0.00838153	0.0116489	0.00247568	0.00419533	0	0	0.00549209	0	0.00306204	0.00579374	0	0.00385193	0	0.00613459	0.00826993	0	0.004703	0	0	0.00409702	0.00233514	0	0	0	0.00343749	0.00527037	0	0	0	0.0073488
P1virus	0	0	0	0	0	0	0	0	0	0	0	0	0	0	0	0	0	0	0	0	0	0	0	0	0.00378043	0	0	0	0	0	0	0	0	0	0	0	0	0	0	0	0	0	0	0	0	0	0	0	0
P2virus	0	0	0	0	0	0	0	0	0	0	0	0	0	0	0	0	0	0	0	0.00419076	0	0	0	0	0	0	0	0	0	0	0	0	0	0	0	0	0	0	0	0.00233514	0	0	0	0.00343749	0	0	0	0	0
Paenalcaligenes	0	0	0	0	0	0	0	0.00390701	0	0	0	0	0	0	0	0	0	0.00291239	0	0.00419076	0	0	0	0	0	0.00549209	0	0.00306204	0	0	0	0	0	0	0	0	0	0	0	0	0	0	0	0	0	0	0	0	0
Paenarthrobacter	0	0	0.00436986	0	0	0	0	0	0	0	0	0	0	0	0	0	0	0	0	0.00419076	0	0	0	0	0	0	0	0	0.00289687	0	0	0	0	0	0	0.004703	0	0	0	0	0	0.00305055	0	0	0	0	0	0	0
Paenibacillus	0.11754	0.0432732	0.166055	0.0891972	0.0862638	0.128736	0.107336	0.148466	0.172291	0.133119	0.170519	0.152849	0.0347569	0.0567634	0.158292	0.0901868	0.19992	0.168919	0.143832	0.0963876	0.163085	0.0519892	0.146837	0.122234	0.0756086	0.230668	0.127053	0.0887991	0.19409	0.106278	0.0808906	0.119289	0.0245384	0.0620245	0	0.131684	0.136858	0.171657	0.159784	0.0910704	0.0874154	0.146426	0.0964686	0.134062	0.115948	0.0505766	0.146929	0.141379	0.195968
Pajaroellobacter	0	0	0	0	0	0	0	0	0	0	0.00315776	0	0	0	0	0	0	0	0	0	0	0	0	0	0	0	0	0	0	0	0	0	0	0	0	0	0	0	0	0	0	0	0	0	0	0	0	0	0
Paludibacter	0.0033583	0.00865464	0.0131096	0.0099108	0	0.00279861	0.00306673	0.00390701	0.0168088	0.00391527	0.00315776	0.00527065	0.0130338	0	0.0162351	0.00858922	0	0.014562	0.00668986	0.0125723	0	0	0.0167813	0.0188052	0	0.0384446	0.0154943	0.00306204	0.00869061	0.0103686	0	0	0.00613459	0	0	0.00940601	0	0	0.0122911	0.00700542	0.00647522	0.0183033	0.00689061	0	0.00527037	0	0	0.00344828	0.0097984
Paludisphaera	0	0	0.00873973	0.0033036	0	0.00279861	0.00613346	0.00390701	0	0	0.00631552	0.00527065	0.00434461	0	0.00405877	0.00429461	0.004998	0.00582479	0.00334493	0	0	0.00247568	0.00839067	0.00626841	0	0.00549209	0.00309885	0.00306204	0.00289687	0.00259215	0	0	0	0.00413496	0	0	0.00622084	0	0	0.00233514	0	0.0122022	0.00344531	0.00343749	0	0	0.00367323	0.00689655	0.0024496
Pamx74virus	0	0	0	0	0	0	0	0	0	0	0	0	0	0	0	0	0	0	0	0	0	0	0	0	0	0	0	0	0	0	0	0	0	0	0	0	0	0	0	0	0	0	0	0	0	0	0	0	0
Pandoraea	0.0134332	0.00865464	0.0131096	0.0132144	0	0.00559722	0.0092002	0.011721	0.0252133	0.00783055	0.00315776	0.0105413	0	0.00567634	0.0162351	0.0214731	0.014994	0.0116496	0.00668986	0.00838153	0.0174734	0.00247568	0.0293673	0.015671	0.00378043	0.0439367	0.00619771	0.00612407	0.0173812	0.0129608	0.00385193	0.0198815	0	0	0	0.00940601	0	0.0238413	0.0245821	0.0140108	0.0129504	0.0213538	0.0137812	0.00687498	0.00527037	0	0.00734646	0.00344828	0.0073488
Pannonibacter	0.0033583	0	0.00436986	0.0033036	0	0.00559722	0	0.00390701	0.0126066	0.00783055	0	0	0	0	0.00811754	0.00429461	0.004998	0	0.0133797	0.00838153	0.00582445	0	0	0.00313421	0	0.0164763	0.00929656	0.00306204	0.00289687	0	0	0	0.00613459	0.00413496	0	0.004703	0.00622084	0	0.0122911	0.00233514	0	0	0.00344531	0	0.00527037	0	0	0.0103448	0.0024496
Pantoea	0.0167915	0	0.0131096	0.0132144	0.00507434	0.0223889	0.0092002	0.0234421	0.00840442	0.0117458	0.00631552	0.00527065	0	0.00567634	0.0162351	0.0171784	0.02499	0.00873718	0.0100348	0.00838153	0.0116489	0.00495135	0.0209767	0.00940262	0	0.0164763	0.021692	0.0122481	0.0173812	0.0103686	0.00385193	0.0079526	0.00613459	0.0206748	0	0.00940601	0.0186625	0.00476826	0.0204851	0.0116757	0.00971282	0.0213538	0.00689061	0.0103125	0.00527037	0	0.0146929	0.0103448	0.0195968
Parabacteroides	9.84653	0.0692371	4.65391	0.961348	4.13559	7.27359	1.3831	7.16546	5.00483	8.74281	1.04838	0.711537	6.92532	1.50707	0.742755	1.16813	0.089964	8.2246	9.22531	0.842343	3.30246	1.85676	10.4212	3.77672	4.94481	10.1604	8.78215	6.73954	7.08575	5.11691	9.34479	0.266412	4.20833	0.206748	0	11.6964	0.646967	0.0572191	1.03655	7.13385	8.43721	9.7709	2.12231	0.00343749	0.342574	0	3.04143	5.65517	7.75298
Paraburkholderia	0.00671659	0	0	0.0099108	0.0101487	0.00839584	0.0214671	0.0195351	0.0210111	0.00783055	0.00947328	0.0105413	0	0.0113527	0.0121763	0.0171784	0.004998	0.0116496	0.0200696	0	0.0116489	0.00247568	0.0167813	0.015671	0.00378043	0.0274605	0.00309885	0.00306204	0.0144844	0.0051843	0.0154077	0.0039763	0.00613459	0.00413496	0.0290529	0.018812	0.00622084	0.0286096	0.0122911	0.00700542	0.0194256	0.0152527	0.0103359	0.00343749	0.0105407	0	0.00734646	0.0137931	0.0097984
Parachlamydia	0	0	0.00436986	0	0	0	0	0	0	0	0.00315776	0	0	0	0	0	0	0.00291239	0.00334493	0	0	0	0	0	0	0	0	0	0	0	0	0	0	0	0	0	0	0.00476826	0	0	0	0	0	0	0	0	0.00367323	0	0
Paracoccus	0	0	0.00873973	0.0066072	0	0	0.00306673	0.00781403	0	0	0.00947328	0.00527065	0	0.00567634	0	0.00429461	0	0	0.00334493	0.0167631	0	0	0.00839067	0.00313421	0.00378043	0	0	0.00306204	0.00579374	0.0051843	0.0115558	0.0079526	0	0	0	0.004703	0	0	0	0.00934056	0	0.0122022	0	0.00343749	0.00527037	0.0101153	0.0110197	0	0.0048992
Parageobacillus	0	0	0	0	0	0.00279861	0.00306673	0	0	0	0.00315776	0	0	0	0	0	0.004998	0	0	0	0	0.00247568	0	0	0	0	0	0	0	0.00259215	0	0	0	0	0	0	0	0	0	0	0	0	0	0	0	0	0	0	0
Paraglaciecola	0	0	0	0	0	0	0	0	0	0	0	0	0	0	0	0	0	0	0	0	0	0	0	0	0	0	0	0	0	0	0	0	0	0	0	0	0	0	0	0	0	0	0	0	0	0	0	0	0
Paraoerskovia	0.0033583	0	0	0.0033036	0	0	0	0	0	0	0	0	0	0	0	0	0	0	0	0	0	0	0	0	0	0	0	0	0	0	0	0	0	0	0	0	0	0	0	0	0	0	0	0	0	0	0	0	0
Paraphotobacterium	0	0	0	0	0	0	0	0	0	0	0	0	0	0	0	0	0	0	0	0	0.00582445	0	0	0	0	0.00549209	0	0	0	0	0	0	0	0	0	0	0	0	0	0	0.00323761	0	0	0	0.00527037	0	0	0	0
Parapoxvirus	0	0	0	0	0	0	0	0	0	0	0	0	0	0	0	0	0	0	0	0	0	0	0	0	0	0	0	0	0	0	0	0	0	0	0.0290529	0	0	0	0	0	0	0	0	0	0	0	0	0	0
Pararhodospirillum	0	0	0	0	0	0	0	0	0	0	0.00315776	0	0	0	0	0	0	0	0	0.00419076	0	0	0	0	0	0	0	0	0	0	0	0	0.00613459	0	0	0	0	0	0.00409702	0	0	0	0.00344531	0	0	0	0	0	0
Parasaccharibacter	0	0	0	0	0	0	0	0	0	0	0.00315776	0	0	0	0	0	0.004998	0	0	0	0	0	0	0	0	0	0	0	0	0	0	0	0	0	0	0	0	0	0	0	0	0	0	0	0	0	0	0	0
Parascardovia	0	0.00432732	0.00436986	0.0066072	0	0.00559722	0.0276006	0	0	0.00783055	0.00315776	0	0	0.00567634	0.0568228	0.00429461	0.004998	0.00582479	0.00334493	0.0293353	0	0	0	0.0438789	0.00756086	0.00549209	0	0	0	0.00259215	0.00770386	0	0.0736151	0.00413496	0	0	0.00622084	0.0190731	0.0450672	0.0350271	0.0129504	0.0213538	0.00689061	0.00343749	0	0	0	0	0.0024496
Parvibaculum	0	0	0.00436986	0.0033036	0	0	0.00306673	0	0	0.00391527	0	0	0	0	0	0	0	0	0	0.00419076	0	0	0.00839067	0	0	0.00549209	0	0.00306204	0	0	0.00385193	0.0039763	0	0	0	0	0	0	0	0	0	0	0	0	0	0	0	0	0
Parvimonas	0.00671659	0	0.00436986	0	0.00507434	0.00279861	0	0.00390701	0.00840442	0	0	0.00527065	0	0.00567634	0.00811754	0.00858922	0.009996	0.00291239	0.0100348	0.00419076	0	0.00495135	0	0.00313421	0.00378043	0.00549209	0.00619771	0	0.00289687	0.0103686	0.0346674	0	0.0122692	0	0	0.004703	0.00622084	0	0.00409702	0.00233514	0.00323761	0	0.00344531	0.00687498	0.00527037	0.0101153	0.00367323	0	0.0073488
Parvularcula	0	0	0	0	0	0	0	0	0	0	0	0	0	0	0	0	0	0	0	0	0	0.00247568	0.00419533	0	0	0	0	0.00306204	0	0.00259215	0	0	0	0	0	0	0	0	0	0	0	0	0	0.00343749	0	0	0	0.00344828	0
Pasteurella	0.0033583	0.0259639	0	0	0	0	0	0	0.00420221	0.00391527	0.00315776	0.00527065	0	0.0085145	0	0.00429461	0.004998	0	0.00334493	0.00838153	0	0.00247568	0.00419533	0.00313421	0	0.0109842	0.00619771	0	0.00289687	0	0	0.0039763	0.00613459	0.00413496	0	0.004703	0	0.0190731	0.00409702	0.00233514	0.016188	0.00305055	0.00344531	0.00343749	0	0.0101153	0	0.00344828	0.0048992
Paucibacter	0.00671659	0	0	0.0033036	0	0.00279861	0	0.00781403	0	0	0	0	0	0	0.00811754	0	0	0	0	0.00419076	0.00582445	0.00247568	0	0	0	0.00549209	0	0	0.00579374	0	0	0.0079526	0	0	0	0	0.00622084	0	0	0	0	0	0.00344531	0	0	0	0	0	0
Pectobacterium	0.0134332	0.00432732	0.00436986	0.0033036	0.00507434	0.00559722	0.00306673	0.0156281	0.00420221	0.00391527	0	0	0	0.00283817	0.0121763	0.00858922	0	0.00291239	0.00334493	0.00419076	0	0.00495135	0.00419533	0.00313421	0.00378043	0.0109842	0.00309885	0	0.00289687	0	0.00385193	0	0.00613459	0.00413496	0	0.004703	0.0124417	0.00476826	0.0122911	0.0116757	0.00323761	0.00305055	0	0	0.00527037	0.0101153	0	0	0.0097984
Pediococcus	0.0033583	0.012982	0.00436986	0.0066072	0.0202974	0.00559722	0.00306673	0.00781403	0.00420221	0.00391527	0.00315776	0.00527065	0	0.00567634	0.0202939	0.00858922	0.004998	0.00582479	0.0100348	0.00419076	0	0	0.00419533	0.00313421	0.00378043	0.0219684	0.0185931	0.00612407	0.00579374	0.00777645	0.00385193	0.0119289	0.00613459	0.00826993	0.0290529	0.014109	0.00622084	0.00476826	0.00409702	0.00700542	0.00323761	0.0274549	0.00344531	0	0	0.0101153	0.00734646	0	0.0073488
Pedobacter	0.0033583	0	0.00436986	0.0033036	0	0.00279861	0.0153337	0	0.00840442	0.00391527	0.00631552	0	0.00868923	0.00283817	0.0121763	0.00429461	0	0.00582479	0.00334493	0	0	0.00247568	0.012586	0.00940262	0.00378043	0	0.00309885	0.0122481	0.0115875	0.0103686	0	0.0079526	0	0.00413496	0	0.004703	0.00622084	0.00476826	0.00409702	0.0116757	0.00323761	0.00915164	0.0103359	0.00343749	0.0158111	0	0.00367323	0.00689655	0.0073488
Pelagibaca	0	0	0	0	0	0	0.00306673	0	0	0.00783055	0.00315776	0	0	0	0	0.00429461	0	0	0	0	0	0	0.00419533	0	0	0	0	0.00306204	0	0	0	0.0079526	0	0	0	0.004703	0	0	0	0.00233514	0	0	0	0	0	0	0	0	0
Pelagibacterium	0	0	0	0	0	0	0	0	0	0	0.00315776	0	0	0	0	0	0	0	0	0	0.00582445	0	0	0	0	0	0	0	0	0	0	0	0	0	0	0	0	0	0	0	0	0	0	0	0	0	0.00367323	0	0
Pelobacter	0.0100749	0.00432732	0.00436986	0.0033036	0.00507434	0.0139931	0.00306673	0.0156281	0.00420221	0.0156611	0.012631	0.0105413	0	0.00283817	0.0121763	0.0214731	0.019992	0.00873718	0.0133797	0.00419076	0.0174734	0	0.012586	0.0188052	0.00756086	0.0219684	0.00309885	0.00306204	0.00579374	0.0051843	0	0.0119289	0	0.00826993	0	0.004703	0	0.00476826	0.0163881	0.0140108	0	0.0183033	0.00689061	0.00687498	0.0105407	0	0.0146929	0.00689655	0.012248
Pelodictyon	0.0033583	0	0.00873973	0.0132144	0.00507434	0	0	0	0	0.00391527	0.00631552	0	0	0	0	0	0.004998	0.00291239	0.00334493	0.00419076	0	0	0.00839067	0.00313421	0	0	0.00309885	0	0	0.00259215	0	0.0039763	0	0	0	0.004703	0	0	0.0245821	0.00467028	0.00647522	0	0	0	0	0	0.00367323	0	0.0024496
Pelosinus	0.00671659	0.00432732	0.00436986	0.0033036	0.00507434	0.0111944	0.00306673	0.00781403	0.00840442	0.00391527	0.00315776	0.0210826	0.00434461	0.0085145	0.00405877	0.00429461	0.009996	0.0116496	0.00668986	0.00838153	0	0.00247568	0.00419533	0.00940262	0	0.0109842	0.00619771	0.00612407	0.0115875	0.00777645	0	0.0039763	0.00613459	0.00826993	0	0.00940601	0	0.00476826	0.00409702	0.00934056	0.00323761	0.00305055	0.0172265	0	0.0105407	0	0.0146929	0.00344828	0.0024496
Peptoclostridium	0	0	0	0.0033036	0.00507434	0	0.00613346	0.00781403	0.00840442	0	0.00947328	0	0.00868923	0.00283817	0	0.00429461	0.004998	0.00291239	0.0100348	0.00838153	0.0116489	0.00247568	0.00419533	0.00313421	0	0	0	0	0.00289687	0.00777645	0.0115558	0.0039763	0.00613459	0	0	0	0	0	0.00409702	0.00233514	0	0.00305055	0.00344531	0	0	0	0.00734646	0	0.0024496
Peptoniphilus	0.0033583	0	0.00873973	0	0	0	0	0	0.00420221	0.00391527	0.00315776	0	0.00434461	0	0.00405877	0.00429461	0	0.00291239	0.00668986	0	0	0	0.00419533	0.00313421	0.00378043	0.00549209	0.00619771	0.00306204	0.00579374	0.00259215	0.00385193	0.0079526	0	0.00826993	0	0	0.00622084	0	0.00409702	0.00467028	0.00647522	0.00610109	0.00344531	0	0.0263518	0	0	0	0
Pepy6virus	0	0	0	0	0	0	0	0	0	0	0	0	0	0	0	0	0	0	0	0	0	0	0	0	0	0	0	0	0	0	0	0	0	0	0	0	0	0	0	0	0	0	0	0	0	0	0	0	0
Persephonella	0	0	0	0	0	0	0	0	0	0	0	0	0.00434461	0	0	0	0	0	0	0	0	0	0	0	0	0	0	0	0	0	0	0	0	0	0	0	0	0	0	0	0	0	0	0	0	0	0	0	0
Persicobacter	0	0	0	0.0066072	0	0.00279861	0	0	0	0	0	0	0	0.00283817	0.00405877	0	0	0.00291239	0.00334493	0	0	0	0	0.00313421	0	0	0	0	0	0.00259215	0.00385193	0	0	0	0	0.004703	0	0	0	0.00467028	0	0.00305055	0	0	0	0	0	0	0
Petrimonas	0.0167915	0.0173093	0.0305891	0.0066072	0.0202974	0.00839584	0.0153337	0.00390701	0.0168088	0.0156611	0.00947328	0	0.00434461	0.00283817	0.00405877	0.00858922	0.009996	0.00873718	0.0133797	0.00838153	0	0.0148541	0.0335627	0.0219394	0.00378043	0.0219684	0.00929656	0.0122481	0.0115875	0.0181451	0.00770386	0.0278341	0	0.00826993	0	0.018812	0.0248834	0	0.00819404	0.0116757	0.016188	0.0213538	0.0103359	0	0.0158111	0	0	0.037931	0.0146976
Petrotoga	0	0	0	0	0	0	0	0	0	0	0	0	0	0	0	0	0	0	0	0	0	0	0	0	0	0	0	0	0	0	0	0	0	0	0	0	0	0	0	0	0	0	0	0	0	0	0	0	0
Phaeobacter	0.00671659	0	0	0.0066072	0	0.00559722	0.00306673	0	0.00840442	0	0.00631552	0.00527065	0	0	0.00405877	0	0	0.00582479	0.00668986	0.00419076	0	0.00495135	0	0.00313421	0	0	0.00309885	0	0.00869061	0.00259215	0	0.0039763	0	0	0	0.004703	0.00622084	0	0.00819404	0.00233514	0	0	0.00344531	0	0	0	0.00367323	0.00344828	0.0024496
Phenylobacterium	0	0	0.00436986	0	0	0	0	0.00781403	0.00420221	0.00391527	0	0	0	0	0.00405877	0	0	0.00873718	0	0	0	0	0	0	0	0	0	0.00306204	0.00289687	0.0051843	0	0.0039763	0	0	0	0	0.00622084	0.00476826	0	0	0	0.00305055	0.00344531	0	0	0	0.00367323	0	0
Phietavirus	0	0	0	0	0	0	0	0	0	0	0	0	0	0	0	0	0	0	0	0	0	0	0	0	0	0	0	0	0	0	0	0	0	0	0	0	0	0	0	0	0	0	0	0	0	0	0	0	0
Phifelvirus	0	0	0	0	0	0	0	0	0	0	0	0	0.0130338	0	0	0	0	0	0	0	0	0	0	0	0	0	0	0	0	0	0	0	0	0	0	0	0	0	0	0	0	0	0	0.0103125	0	0	0	0	0
Phix174microvirus	0	0	0	0	0	0	0	0	0	0	0	0	0	0	0	0	0	0	0	0	0	0	0	0	0	0	0	0	0	0	0	0	0	0	0	0	0	0	0	0	0	0	0	0	0	0	0	0	0
Phoenicibacter	0.0235081	0	0.00873973	0.0297324	0.015223	0.0111944	0.0122669	0.0195351	0.0210111	0.00391527	0.00631552	0.00527065	0	0.0141908	0.0284114	0.0214731	0.019992	0.014562	0.0234145	0.0293353	0.0232978	0	0.00839067	0.0188052	0.0151217	0.0384446	0.0123954	0.0153102	0.0289687	0.00259215	0.00770386	0.0039763	0.0490767	0	0	0.018812	0.0311042	0.0238413	0.0122911	0.00467028	0.016188	0.0152527	0.0241171	0.01375	0	0	0.0110197	0.0172414	0.012248
Photobacterium	0.0033583	0	0.00873973	0	0.00507434	0.00279861	0.00306673	0	0	0.00391527	0	0	0	0	0	0.00429461	0.004998	0	0	0	0	0.00495135	0	0.00313421	0	0	0.00309885	0	0	0.0051843	0	0.0039763	0	0.00413496	0	0	0	0	0.00819404	0	0.00323761	0	0	0.01375	0	0	0.00367323	0	0.0073488
Photorhabdus	0	0	0	0.0033036	0	0	0.00306673	0.00390701	0	0.00391527	0.00315776	0	0	0	0	0.00429461	0	0	0	0	0	0.00495135	0	0.00626841	0	0.00549209	0	0	0	0	0	0	0	0	0	0.004703	0.00622084	0	0	0.00233514	0	0.00305055	0	0.00343749	0	0.0101153	0	0	0.0024496
Phycicoccus	0	0	0	0	0	0	0	0	0	0	0	0	0	0	0	0	0	0.00291239	0.00334493	0	0	0	0	0	0	0	0	0	0	0	0	0	0.00613459	0	0	0	0	0.00476826	0	0	0	0	0.00344531	0	0	0	0	0	0
Phycisphaera	0.0033583	0	0.00436986	0	0	0.00279861	0	0.00390701	0	0	0	0	0	0.00283817	0	0.00429461	0.004998	0.00291239	0.00334493	0	0	0.00247568	0	0.00313421	0	0	0	0	0	0.00259215	0	0	0	0	0	0.004703	0	0.00476826	0	0	0.00323761	0.00305055	0.00689061	0.00343749	0	0	0	0.00344828	0.0024496
Picrophilus	0	0	0	0	0	0.00279861	0	0	0	0	0	0	0	0	0	0	0	0	0	0	0.00582445	0	0.00419533	0	0	0	0.00309885	0	0	0.00259215	0	0	0	0	0	0	0	0	0	0	0	0	0	0	0	0	0	0	0.0024496
Pimelobacter	0	0	0	0	0	0	0	0	0.00840442	0	0	0	0	0	0	0.00429461	0	0	0	0	0	0	0.00419533	0	0	0.00549209	0	0	0	0	0	0	0.00613459	0	0	0	0	0	0	0	0.00647522	0	0	0	0	0	0.00367323	0	0.0024496
Pirellula	0	0	0	0.0033036	0.00507434	0	0	0	0	0	0	0	0	0	0	0	0.004998	0	0.00334493	0	0	0	0.00419533	0	0.00378043	0	0	0	0.00289687	0	0	0	0	0	0	0.004703	0	0	0	0	0	0	0	0	0	0	0	0	0
Piscirickettsia	0	0	0	0	0	0	0	0	0	0	0	0	0	0	0	0	0	0	0	0	0	0	0	0	0	0	0	0	0	0	0	0	0	0	0	0	0	0	0	0	0	0	0	0	0	0	0	0	0
Pithovirus	0	0	0	0	0	0	0	0	0	0	0	0	0	0	0	0	0	0	0	0	0	0	0	0	0	0	0	0	0	0	0	0	0	0	0	0	0	0	0	0	0	0	0	0	0	0	0	0	0
Planctomyces	0	0	0.00436986	0	0	0	0	0.00781403	0.00420221	0.00391527	0	0	0	0	0.0121763	0	0	0	0	0	0	0	0	0	0.00378043	0	0.00309885	0.00306204	0.00289687	0	0.0115558	0.0039763	0	0.00413496	0	0.004703	0.00622084	0	0.00819404	0.00467028	0	0.00305055	0	0	0	0	0	0.00344828	0.0073488
Planctopirus	0	0	0	0.0033036	0	0	0	0.00390701	0	0	0.00315776	0.00527065	0	0	0	0.00429461	0	0.00291239	0	0.00419076	0	0	0.00839067	0	0	0	0.00309885	0	0	0	0	0	0	0	0.0290529	0	0	0	0.00409702	0	0.00323761	0.00305055	0.00344531	0.00343749	0	0	0	0	0
Planktomarina	0	0	0	0.0033036	0	0	0	0	0	0	0	0	0	0	0	0	0	0.00291239	0	0	0	0	0	0	0	0	0	0	0	0	0	0	0	0	0	0	0	0	0	0.00233514	0	0	0	0	0	0	0	0	0
Planktothrix	0	0	0	0	0	0	0.00306673	0	0	0	0	0	0	0	0.00405877	0	0	0	0	0	0	0	0	0.00313421	0	0	0	0	0	0	0	0	0	0	0.0290529	0	0	0	0	0	0	0	0	0	0	0	0	0	0
Planococcus	0.0134332	0.00432732	0.00873973	0.0033036	0	0.0139931	0.00613346	0.011721	0.0336177	0.00391527	0.00947328	0.00527065	0.00868923	0.0085145	0.0121763	0.0128838	0.019992	0.0203868	0.0200696	0.0293353	0.0116489	0.00247568	0.025172	0.00940262	0.0113413	0.0219684	0.00309885	0.0122481	0.00579374	0.0103686	0.00385193	0.0198815	0	0.00826993	0	0.018812	0	0.00953653	0.0163881	0.00700542	0.00971282	0.00915164	0.0137812	0.01375	0	0.0101153	0.0146929	0.0137931	0.0146976
Plantactinospora	0.0033583	0	0.00436986	0	0	0	0.00613346	0	0.00420221	0	0	0.00527065	0	0.00283817	0	0.00429461	0.009996	0.00291239	0.00668986	0	0.00582445	0.00247568	0	0.00313421	0	0	0	0.00612407	0.00579374	0.00259215	0	0	0	0	0	0.014109	0	0	0	0.00467028	0	0.00915164	0	0.00343749	0.0105407	0	0	0.00344828	0.0024496
Plantibacter	0	0	0.00436986	0	0	0	0	0	0	0	0	0	0	0	0	0	0	0	0	0	0	0	0	0	0	0	0	0	0	0.00259215	0	0	0	0	0	0	0	0	0	0	0.00323761	0	0	0	0	0	0	0	0
Plesiomonas	0	0	0	0.0033036	0	0	0	0	0	0	0	0	0	0	0	0	0	0.00291239	0	0	0	0.00247568	0	0.00313421	0.00378043	0.00549209	0	0	0	0	0	0	0	0	0	0	0	0.00476826	0.00819404	0	0	0	0	0	0	0	0	0.00344828	0
Pleurocapsa	0	0	0	0	0	0	0	0	0	0	0	0	0	0	0	0	0	0	0	0	0	0	0	0	0	0	0	0	0	0	0	0	0	0	0	0	0	0	0	0	0	0	0	0	0	0	0	0	0
Pluralibacter	0	0.00432732	0.0131096	0	0.00507434	0	0.00306673	0.011721	0.00420221	0	0	0.00527065	0.0130338	0	0.00405877	0	0.004998	0	0	0.00419076	0	0	0.00419533	0.00313421	0	0.00549209	0.00309885	0.00612407	0.00289687	0.00259215	0.00770386	0.0039763	0	0.00826993	0	0.00940601	0.0124417	0.00476826	0	0	0	0.00305055	0	0.00687498	0	0	0	0.00689655	0.012248
Polaribacter	0.0033583	0	0.00436986	0.0066072	0.00507434	0.00559722	0.00306673	0.011721	0.00420221	0	0	0.00527065	0.00434461	0.00283817	0.00405877	0.00429461	0	0.00873718	0	0	0	0.00495135	0.00839067	0	0	0	0.00929656	0.00306204	0	0.00259215	0.00385193	0.0079526	0	0.00413496	0	0	0	0.00476826	0.00409702	0.00467028	0.00971282	0	0.00689061	0.00343749	0	0.0101153	0.0110197	0.00344828	0.0024496
Polaromonas	0	0	0.0131096	0	0	0.00559722	0.00306673	0.00390701	0.00420221	0	0.012631	0.00527065	0.00434461	0	0.00405877	0.00858922	0	0.00291239	0.0100348	0	0.00582445	0	0.00839067	0.00313421	0	0	0	0	0.00289687	0.0051843	0	0	0	0	0	0	0.00622084	0.0190731	0.00409702	0.00934056	0.00323761	0.00305055	0.00344531	0.00687498	0	0	0	0.00689655	0
Polymorphum	0	0	0	0	0	0	0.00306673	0	0.00420221	0.00391527	0	0	0	0	0	0	0	0.00291239	0	0.00419076	0	0	0	0	0	0	0	0	0	0	0	0.0039763	0	0	0	0	0.00622084	0	0	0	0	0	0	0	0	0	0	0.00344828	0.0024496
Polynucleobacter	0.0033583	0	0	0	0.00507434	0	0	0	0	0	0	0	0	0	0	0.00429461	0	0.00291239	0	0	0	0	0	0	0	0	0	0	0	0	0	0	0	0.00413496	0	0	0	0	0	0	0	0	0	0	0	0	0	0	0
Pontibacter	0.00671659	0	0.0131096	0.0033036	0	0.00279861	0.00613346	0.00390701	0.0126066	0.00391527	0	0	0	0	0.00405877	0.00429461	0.004998	0.00291239	0.00668986	0	0	0.00742703	0.00839067	0.00940262	0.00378043	0.0164763	0	0.00612407	0	0.0051843	0.00385193	0.0039763	0	0	0	0	0	0	0.0163881	0.00700542	0.00647522	0.00305055	0.00344531	0.00343749	0	0	0	0.00689655	0.0024496
Porphyrobacter	0.0033583	0	0	0.0033036	0	0.00279861	0	0	0	0	0	0	0	0	0.00405877	0	0	0.00291239	0	0	0	0	0.00419533	0	0	0	0	0	0	0	0	0	0	0	0	0	0	0	0.00409702	0	0	0.00610109	0	0	0	0	0	0	0.0024496
Porphyromonas	0.0134332	0.012982	0.0611781	0.0363396	0	0.0139931	0.00306673	0.00390701	0.0210111	0.0234916	0.00631552	0	4.07959	0.0085145	0.0162351	0	0	0.00873718	0.0100348	0.00838153	0.0116489	0.0321838	0.0209767	0.0313421	0.0151217	0.0219684	0.0154943	0.00918611	0.00869061	0.00777645	0.00770386	0.0039763	0.00613459	0.00413496	0	0.004703	0.00622084	0	0.0532612	0.0373622	0.0129504	0.0305055	0.0206718	0	0.0105407	0.0101153	0.0440788	0.00689655	0.0146976
Potyvirus	0	0	0	0	0	0	0	0	0	0	0	0	0	0	0	0	0	0	0	0	0	0	0	0	0	0	0	0	0	0	0	0	0	0	0	0	0	0	0	0	0	0	0	0	0	0	0	0	0
Pragia	0	0	0	0	0.00507434	0	0	0.00390701	0	0	0	0	0	0	0	0	0	0	0	0	0	0	0	0	0.00378043	0	0	0	0	0	0	0	0	0	0	0	0	0	0.00409702	0	0	0	0	0	0	0	0	0	0
Prasinovirus	0	0	0	0	0	0	0	0	0	0	0	0	0	0	0	0	0	0	0	0	0	0	0	0	0	0	0	0	0	0	0	0	0	0	0.0290529	0	0	0	0	0	0	0	0	0	0	0	0	0	0
Prauserella	0.0033583	0	0	0	0.00507434	0	0	0	0	0	0	0	0	0.00283817	0.00405877	0	0	0	0	0	0	0.00247568	0.00419533	0	0	0.00549209	0	0	0.00579374	0	0	0.0039763	0	0.00826993	0	0	0	0	0.00409702	0.00233514	0	0	0	0	0.00527037	0	0	0	0
Prevotella	0.399637	0.164438	0.463206	0.597952	0.0355204	0.0755625	0.475343	0.0546982	1.07156	0.14095	0.145257	0.0158119	0.16944	0.0141908	0.16641	0.506764	0.259896	0.0902842	0.214075	0.469366	0.0698934	0.230238	0.843262	0.523413	0.215485	1.44442	0.576387	0.0949231	0.336037	0.106278	0.161781	0.25846	1.57046	0.124049	0	0.884165	0.0933126	0.0333778	1.68387	0.282552	1.00042	1.00668	0.323859	0.0274999	0.158111	0.455189	0.0587717	0.624138	0.622198
Prochlorococcus	0.0033583	0.00432732	0	0	0	0.00279861	0	0	0.00420221	0.00391527	0.00947328	0	0	0	0	0	0.009996	0	0	0	0	0	0	0.00313421	0	0	0	0	0.00289687	0.0051843	0	0	0	0	0	0	0	0.00953653	0.00409702	0.00233514	0	0	0.00344531	0	0	0	0.00367323	0	0.0024496
Propionibacterium	0	0	0.0174795	0.0066072	0	0	0	0.00781403	0.0126066	0	0	0	0	0	0.00811754	0	0.004998	0.00291239	0.00334493	0	0.00582445	0	0.00419533	0	0	0.00549209	0.00929656	0	0.00869061	0.00259215	0	0	0	0	0	0.00940601	0.0124417	0	0.00819404	0	0.00323761	0.00915164	0.00344531	0	0	0.0101153	0	0	0
Propionimicrobium	0.0100749	0.00865464	0.00873973	0.0066072	0	0.0139931	0.00613346	0.011721	0.0126066	0.00391527	0.0157888	0.0105413	0	0.0085145	0.00405877	0.00429461	0.009996	0.00582479	0.0100348	0.00838153	0.0174734	0.00495135	0.00839067	0.00313421	0.0226826	0.0109842	0.00309885	0.00612407	0.00579374	0.0051843	0.00770386	0.0039763	0	0.0165399	0	0.004703	0.0186625	0.0238413	0.00409702	0.00233514	0.00647522	0.00610109	0.00344531	0.00687498	0	0.0101153	0.00367323	0.00344828	0.0073488
Prosthecochloris	0	0	0.0174795	0.0132144	0	0.00839584	0.00613346	0	0.0252133	0.0156611	0.00315776	0	0	0.00283817	0.00811754	0.00429461	0.004998	0.00873718	0.00334493	0	0.00582445	0.00247568	0	0.00626841	0.00378043	0.0109842	0.00619771	0.00306204	0.00289687	0.0051843	0.0192597	0.0119289	0	0	0	0.014109	0	0	0	0.00233514	0	0.00610109	0.00689061	0.00343749	0	0	0.00734646	0.00689655	0.0097984
Proteiniphilum	0	0.00432732	0.00873973	0.0231252	0.0101487	0.00559722	0.0184004	0.011721	0.00840442	0.00783055	0.0221043	0.00527065	0.00434461	0	0.00405877	0.0214731	0	0.0116496	0.0100348	0.0251446	0.00582445	0.00742703	0.0209767	0.0219394	0.0151217	0.0274605	0.0154943	0.0122481	0.0115875	0.0129608	0.0154077	0.0079526	0.030673	0.0124049	0	0.004703	0	0.00953653	0.0204851	0.0186811	0.0129504	0.0152527	0.0206718	0	0.00527037	0	0.00367323	0.0103448	0.0048992
Proteus	0	0	0	0	0	0	0	0.00390701	0.00420221	0	0	0	0	0	0	0	0	0	0	0	0	0	0	0	0	0	0	0	0.00289687	0	0	0	0	0	0	0	0	0	0	0	0	0	0	0.00343749	0	2.16468	0	0	0
Providencia	0	0	0.00436986	0.0033036	0.00507434	0.00279861	0.00306673	0	0.00420221	0.00391527	0.00315776	0	0	0.00283817	0	0	0	0.00582479	0.00334493	0.00419076	0.00582445	0.00247568	0	0.00313421	0.00378043	0.00549209	0	0	0.00579374	0	0.00770386	0	0	0.00413496	0	0	0.00622084	0.00476826	0	0.00700542	0	0	0.00344531	0.00687498	0	0.0101153	0	0	0.0097984
Pseudanabaena	0	0	0	0	0	0	0	0	0	0	0	0	0	0	0	0	0	0	0	0	0	0	0	0	0	0	0	0	0	0	0	0	0	0	0.0290529	0	0	0	0	0	0	0	0	0	0	0	0	0	0
Pseudarthrobacter	0	0	0.00873973	0.0066072	0	0.00559722	0.00306673	0	0.00420221	0.00783055	0.00947328	0.00527065	0	0	0.00405877	0	0.014994	0.0116496	0	0	0.0232978	0.00742703	0.00839067	0.00940262	0.00756086	0.0164763	0.00929656	0.00306204	0.00869061	0.0051843	0.0115558	0.0119289	0	0	0	0.004703	0.00622084	0.0143048	0.00819404	0.00233514	0.00323761	0.0122022	0.00689061	0.00343749	0.00527037	0	0.00367323	0.00689655	0.0048992
Pseudoalteromonas	0.0033583	0.00432732	0	0.0099108	0.00507434	0.00279861	0.00306673	0.00781403	0.00420221	0.00783055	0.00315776	0	0.0130338	0	0.0162351	0	0.004998	0	0	0.00419076	0	0.00495135	0.00839067	0	0.00756086	0.00549209	0.00619771	0	0.00869061	0.00259215	0	0.0079526	0	0.00826993	0	0.004703	0.00622084	0.00476826	0.0122911	0.00467028	0	0.00305055	0.00344531	0	0	0	0.00734646	0	0.0048992
Pseudodesulfovibrio	0.0100749	0	0.0305891	0.0132144	0	0.00559722	0.0153337	0.0195351	0.0168088	0.0195764	0.0157888	0	0	0.00567634	0.0121763	0	0.014994	0.0116496	0.0133797	0.0209538	0.00582445	0.00247568	0.0167813	0.00940262	0.00378043	0.0164763	0.0154943	0.00918611	0.00289687	0.0103686	0.0115558	0.0278341	0.0245384	0.00413496	0	0.00940601	0.0186625	0.0238413	0.0286791	0.0326919	0	0.0152527	0.00689061	0.0103125	0.0579741	0.0101153	0.00734646	0.0137931	0.012248
Pseudogulbenkiania	0.0033583	0	0.00436986	0	0	0	0	0	0.00840442	0	0	0	0	0	0.00405877	0	0.004998	0	0	0.00838153	0	0	0	0	0	0.00549209	0	0	0.00869061	0	0	0	0	0	0	0.014109	0	0	0	0.00467028	0.00323761	0.00305055	0	0	0	0	0	0	0
Pseudohongiella	0	0	0	0	0.00507434	0	0.00306673	0	0	0.00391527	0.00315776	0	0	0	0	0	0	0.00291239	0	0	0	0	0	0	0	0	0	0	0	0	0	0.0039763	0	0	0	0	0	0	0	0.00233514	0	0	0	0	0	0	0	0	0.0024496
Pseudomonas	0.114182	0.012982	0.231603	0.181698	0.0355204	0.12034	0.116536	0.195351	0.214313	0.184018	0.104206	0.0948717	0.0260677	0.0908214	0.146116	0.115954	0.19992	0.148532	0.117073	0.134104	0.168909	0.076746	0.146837	0.159845	0.0642674	0.252636	0.127053	0.0949231	0.220162	0.0985017	0.0731867	0.127242	0.0429422	0.157129	0.348635	0.18812	0.0559876	0.185962	0.204851	0.135438	0.090653	0.186083	0.0964686	0.0893747	0.158111	0.0202306	0.11387	0.127586	0.156774
Pseudonocardia	0.0033583	0	0.00436986	0.0033036	0	0	0.00613346	0.00390701	0.00840442	0.00391527	0.00315776	0	0	0	0	0.00429461	0	0	0	0.00838153	0.00582445	0	0.00419533	0	0	0	0	0	0	0.00259215	0	0	0.00613459	0	0	0.00940601	0	0	0.00409702	0	0	0.00305055	0.00689061	0	0	0	0.00367323	0.00344828	0.0024496
Pseudopedobacter	0.0033583	0.00432732	0	0.0066072	0.0101487	0.00559722	0.00306673	0.00390701	0.00420221	0.00391527	0.00631552	0.00527065	0.00434461	0	0	0	0	0.00582479	0.00668986	0	0	0.00247568	0	0.00313421	0	0	0.00619771	0.00306204	0.00289687	0.00259215	0.00385193	0	0.00613459	0	0	0.004703	0.00622084	0	0	0.00467028	0.00647522	0.00915164	0.0103359	0	0	0	0	0	0.0024496
Pseudopropionibacterium	0	0	0.00436986	0.0396432	0	0.00279861	0	0	0	0	0.00315776	0	0	0	0.0121763	0.00429461	0.014994	0.00291239	0.00334493	0	0.00582445	0	0	0	0.00378043	0.0109842	0.00309885	0.00306204	0.00579374	0	0.00385193	0	0.00613459	0	0	0.00940601	0.00622084	0	0.0122911	0.00700542	0	0.00610109	0	0.00343749	0	0.0101153	0	0.00344828	0.0073488
Pseudorhodoplanes	0.0033583	0	0	0.0033036	0	0	0	0	0	0	0.00315776	0	0	0	0	0	0	0	0	0	0	0	0.00419533	0	0	0	0	0	0.00869061	0	0.00385193	0	0	0	0	0.004703	0	0	0	0	0.00323761	0	0	0	0	0	0	0	0
Pseudothermotoga	0	0	0	0.0033036	0	0	0	0	0	0	0	0	0	0	0	0	0	0	0	0.00419076	0	0	0	0	0	0	0	0	0	0	0	0	0	0	0	0	0	0	0	0.00233514	0.00323761	0	0	0.00343749	0	0	0	0	0
Pseudovibrio	0	0	0	0	0	0.00279861	0	0.00390701	0	0	0	0	0	0	0	0	0	0	0	0	0	0	0	0	0	0	0.00619771	0.00306204	0	0	0	0	0	0	0	0	0	0	0	0.00467028	0	0	0	0	0	0	0	0	0
Pseudoxanthomonas	0	0	0.00873973	0	0.00507434	0	0	0.011721	0.00420221	0.00783055	0	0	0	0	0.00405877	0	0	0.00582479	0	0.00419076	0	0	0	0	0	0	0	0	0.00289687	0	0	0.0079526	0	0	0.0871586	0	0	0	0	0	0	0	0	0	0	0	0	0	0
Psychrobacter	0.0033583	0	0	0.0033036	0	0.00279861	0	0	0.00420221	0	0.00315776	0	0	0	0.00811754	0	0	0.00291239	0.00334493	0.00419076	0	0	0.00419533	0	0.00378043	0	0	0	0	0	0.00385193	0.0039763	0.00613459	0.00413496	0.0581058	0	0	0.00476826	0	0.00467028	0	0.00610109	0	0.00687498	0	0	0	0	0.0024496
Psychroflexus	0	0	0	0	0	0	0	0.00390701	0.00420221	0	0	0	0	0	0	0	0	0	0	0	0	0	0	0	0	0	0.00309885	0	0	0	0	0	0	0	0	0	0	0	0	0.00233514	0	0.00305055	0	0	0	0	0	0	0.0048992
Psychromonas	0	0	0.00436986	0.0033036	0	0.00279861	0	0.00390701	0.00840442	0	0.00315776	0	0.00434461	0	0	0	0.004998	0	0.00334493	0	0	0	0	0	0.00378043	0	0.00619771	0.00306204	0.00579374	0.0051843	0.00770386	0.0039763	0.00613459	0	0	0.004703	0	0	0.00409702	0.00233514	0	0.00305055	0	0.00687498	0	0	0.00734646	0	0
Pusillimonas	0	0	0	0	0	0	0	0	0	0	0.00631552	0	0	0.00283817	0	0	0	0	0.00334493	0	0	0	0	0	0	0	0	0	0	0	0	0	0	0	0	0	0.00622084	0	0	0	0.00323761	0	0.00344531	0	0	0	0	0	0.0024496
Pyrococcus	0	0	0	0	0	0.00279861	0	0	0.00420221	0.00391527	0	0	0	0	0	0	0	0	0	0.00419076	0	0	0	0	0	0	0	0	0.00289687	0	0.00385193	0.0039763	0	0	0	0	0	0	0	0.00233514	0	0	0	0	0	0.0101153	0	0	0
Pyrodictium	0	0	0	0	0	0	0	0	0	0	0	0	0	0	0	0	0	0	0	0	0	0	0	0	0	0	0	0	0	0	0	0	0	0	0	0	0	0	0	0	0	0	0	0	0	0	0	0	0
Rahnella	0.0033583	0	0	0.0066072	0	0	0.0214671	0.00390701	0	0	0.00315776	0.00527065	0	0.00283817	0	0.00429461	0.019992	0.00291239	0.00334493	0	0	0.00247568	0	0.00313421	0	0	0	0.00612407	0.00289687	0	0	0.0039763	0	0.00826993	0	0	0.00622084	0	0.00409702	0.00467028	0.00323761	0.00305055	0	0	0	0	0.00367323	0.00344828	0
Ralstonia	0.0167915	0	0.0349589	0.0099108	0	0.00559722	0.0306673	0.0273491	0.0420221	0.0313222	0.012631	0.0105413	0.00434461	0.00283817	0.0284114	0.0343569	0.029988	0.0174744	0.0334493	0.00838153	0.0407712	0.00247568	0.0293673	0.015671	0.00756086	0.0329525	0.0123954	0.0122481	0.023175	0.0051843	0.0115558	0.0079526	0.00613459	0.00826993	0	0.023515	0.0124417	0.0143048	0.0409702	0.0186811	0.0129504	0.0305055	0.0103359	0	0.00527037	0	0.00734646	0.0241379	0.0171472
Ramlibacter	0.0100749	0	0.0131096	0.0033036	0	0	0.00613346	0	0	0	0.00315776	0	0	0.00283817	0.00405877	0.00858922	0	0.00291239	0.00668986	0.00419076	0.00582445	0.00247568	0.00419533	0.00313421	0	0.00549209	0.00309885	0.00306204	0.00869061	0.00259215	0	0.0079526	0	0	0	0	0	0.00476826	0.00409702	0	0	0.00305055	0.00344531	0.00343749	0	0	0.00734646	0	0
Raoultella	0	0.00432732	0	0.0033036	0.187751	0	0.846418	0.00781403	0.00420221	0.00391527	0	0.0632478	0	0.00283817	0.00405877	0.00429461	0.009996	0	0.0301044	0	0.0291223	1.1091	0	0.00626841	0	0.0164763	0.00619771	8.61963	6.37601	0.00777645	0.00770386	0	0.00613459	0.0124049	0	0	0.0248834	0.00476826	0	0.00700542	0.00323761	0.00610109	0.00344531	0.0206249	0.242437	0.0101153	0.00367323	0.00344828	6.4498
Raphidiopsis	0	0	0	0	0	0	0	0	0	0	0	0	0	0	0	0	0	0	0	0	0	0	0	0	0	0	0	0	0	0	0	0	0	0	0	0	0	0	0	0	0	0	0	0	0	0	0	0	0
Rathayibacter	0	0	0.00436986	0	0	0	0	0.00390701	0	0	0.00631552	0	0	0.00283817	0	0	0	0	0	0	0	0	0	0	0	0	0	0	0	0	0	0	0	0.00413496	0	0	0	0.00476826	0	0	0	0.00305055	0	0	0	0.0101153	0	0	0
Rb49virus	0	0	0	0	0	0	0	0	0	0	0	0	0	0	0	0	0	0	0	0	0	0	0	0	0	0	0	0	0	0	0	0	0	0	0	0	0	0	0	0	0	0	0	0	0	0	0	0	0
Rb69virus	0	0	0	0	0	0	0	0	0	0	0	0	0	0	0	0	0	0	0	0	0	0	0	0	0	0	0	0	0	0	0	0	0	0	0	0	0	0	0	0	0	0	0	0	0	0	0	0	0
Renibacterium	0	0	0	0	0	0	0	0	0	0	0	0	0	0	0	0	0	0	0	0	0	0	0	0	0	0	0	0	0	0	0	0	0	0	0	0	0	0	0.00409702	0	0	0	0.00344531	0	0	0	0	0	0
Rhizobacter	0	0.00432732	0	0	0	0	0.0092002	0	0.00840442	0	0	0	0	0	0.00405877	0.0171784	0	0	0.0133797	0	0	0	0.012586	0.00626841	0	0.0164763	0	0	0.00579374	0	0	0	0	0	0	0	0	0.00953653	0.0122911	0.00467028	0.00647522	0.0122022	0.00689061	0.00343749	0.00527037	0	0.00734646	0	0.0048992
Rhizobium	0.0201498	0	0.0218493	0.0198216	0.0101487	0.0307847	0.0214671	0.0195351	0.0462243	0.0313222	0.00947328	0.00527065	0.00868923	0.0227053	0.0284114	0.0171784	0.014994	0.0232992	0.046829	0.0125723	0.0116489	0.00990271	0.0293673	0.0282079	0.0113413	0.0329525	0.021692	0.0122481	0.0289687	0.0181451	0.0192597	0.0238578	0.0245384	0.0165399	0	0.032921	0.00622084	0.0333778	0.0327761	0.0210163	0.00647522	0.0183033	0.0344531	0.0103125	0.0105407	0.0101153	0.0257126	0.0344828	0.024496
Rhizorhabdus	0	0	0	0	0	0	0	0	0	0	0	0	0	0	0	0	0	0	0	0	0	0	0	0	0	0	0	0	0	0	0	0.0039763	0	0	0	0	0	0	0	0	0	0	0	0	0	0	0	0	0
Rhodanobacter	0	0	0	0	0	0	0	0	0	0	0	0	0	0	0	0	0	0	0	0	0	0	0	0	0	0	0	0	0	0	0	0	0	0	0	0	0	0	0	0.00233514	0	0	0	0	0	0	0	0.00344828	0
Rhodobacter	0.0134332	0	0.00873973	0.0132144	0.00507434	0.00279861	0.00613346	0.00781403	0.00840442	0.0117458	0.00631552	0.0105413	0	0.0113527	0.00405877	0.00429461	0.009996	0.0116496	0.00668986	0.0125723	0	0.00247568	0.012586	0.00313421	0	0.0109842	0.00619771	0.0153102	0.00869061	0.00259215	0.0115558	0.0198815	0	0	0	0.023515	0.0124417	0.00953653	0.0122911	0.016346	0.00323761	0.0122022	0	0	0.00527037	0	0.00734646	0.00689655	0.012248
Rhodococcus	0	0	0.00436986	0	0.00507434	0.00559722	0	0.011721	0.00420221	0.0156611	0.00315776	0	0	0	0.00811754	0.0128838	0.004998	0.014562	0.00334493	0	0.0116489	0.00495135	0.0209767	0.00626841	0.00756086	0.0164763	0.00309885	0.00306204	0	0.00259215	0.00385193	0	0.0122692	0.00413496	0	0	0.0124417	0.00953653	0.0122911	0.00700542	0.00647522	0.00610109	0	0.00343749	0.00527037	0.0101153	0.00734646	0.0137931	0.012248
Rhodoferax	0	0	0.0174795	0.0198216	0	0.00559722	0.00613346	0.0156281	0.00840442	0.00783055	0.012631	0	0	0	0.00811754	0	0.009996	0.014562	0.0100348	0.0125723	0.00582445	0.00247568	0.0209767	0.0125368	0	0.0274605	0.00619771	0	0.00869061	0.0051843	0.00385193	0	0	0.00826993	0	0.00940601	0	0.0143048	0.00409702	0	0.00323761	0.00610109	0	0.01375	0.0105407	0	0.00367323	0.00689655	0.0097984
Rhodoluna	0.0033583	0	0	0.0033036	0	0	0	0	0	0	0	0	0	0	0	0.00429461	0	0	0.00334493	0	0	0	0	0.00313421	0	0	0.00309885	0	0	0	0	0	0	0	0	0	0	0	0.00409702	0	0	0	0.00344531	0	0	0	0	0	0.0024496
Rhodomicrobium	0	0	0	0	0	0	0	0	0	0	0	0	0	0	0	0	0	0	0	0.00419076	0	0	0	0	0	0	0	0	0	0	0	0	0	0	0	0	0	0	0	0	0	0	0	0	0	0	0	0.00344828	0
Rhodopirellula	0.0033583	0	0	0	0	0.00279861	0.00306673	0.00390701	0	0	0	0	0	0	0	0	0	0	0.00334493	0.00419076	0.00582445	0.00247568	0	0	0	0	0	0	0	0	0	0	0	0.00413496	0	0.004703	0	0	0	0	0	0	0	0	0	0	0	0	0
Rhodoplanes	0	0	0	0	0	0	0	0	0	0	0	0	0	0	0	0	0.004998	0	0.00334493	0	0	0.00742703	0.00839067	0.00626841	0	0.00549209	0.00619771	0.00306204	0.00289687	0.00259215	0	0.0079526	0	0.00413496	0	0	0	0	0	0	0.00323761	0.00305055	0	0.00343749	0.00527037	0	0	0	0.0024496
Rhodopseudomonas	0	0	0	0	0	0	0.00306673	0	0.00420221	0.00783055	0.00631552	0	0	0.00283817	0.00405877	0.00429461	0	0.00873718	0	0.0125723	0	0.00247568	0	0.00313421	0	0	0	0.00306204	0.00289687	0.00259215	0.00385193	0.0039763	0.00613459	0.00413496	0	0.004703	0	0.00953653	0	0.00700542	0.00323761	0	0.00344531	0	0	0	0.00734646	0.00689655	0
Rhodospirillum	0.0033583	0	0.00873973	0.0066072	0	0.00839584	0.00306673	0	0.00420221	0.00391527	0.00631552	0	0.00434461	0	0	0	0	0.00582479	0	0.0125723	0	0	0.00419533	0	0	0	0.00309885	0	0.00579374	0.0051843	0.00385193	0	0	0.00413496	0	0	0.00622084	0	0.00409702	0	0	0.00915164	0.0103359	0.00343749	0.00527037	0	0.00367323	0.0172414	0.0073488
Rhodothermus	0.0033583	0	0	0	0	0	0	0.00781403	0	0.00783055	0.00315776	0	0	0	0.00405877	0	0.004998	0.00291239	0	0.00419076	0	0	0.00419533	0.00313421	0	0.00549209	0	0	0.00579374	0	0.00385193	0.0119289	0	0.00413496	0	0	0	0.00476826	0.00819404	0.00233514	0	0	0.00344531	0.00687498	0.0105407	0	0	0.00344828	0
Rhodovulum	0.0033583	0	0	0.0132144	0	0.00279861	0	0.00781403	0.0126066	0.0195764	0.00315776	0	0	0	0.0121763	0	0	0.00582479	0.00668986	0.00419076	0	0	0.00419533	0.00626841	0	0.00549209	0.00619771	0.0122481	0.00289687	0.00259215	0.00770386	0.0039763	0.00613459	0	0	0	0	0	0.00819404	0.00467028	0	0.00610109	0	0	0	0	0.00734646	0.00344828	0.0073488
Rickettsia	0.00671659	0	0.00873973	0	0.00507434	0	0	0	0	0.00783055	0.00315776	0	0	0	0	0	0	0	0	0.00838153	0	0.00247568	0	0	0	0.0109842	0	0	0.00289687	0	0	0.0039763	0	0	0.0290529	0.004703	0.0124417	0.00476826	0	0.00233514	0.00323761	0.00610109	0	0	0	0	0	0.00344828	0
Riemerella	0.0033583	0	0	0	0	0	0	0	0	0	0.00315776	0	0	0	0	0	0	0	0	0	0	0	0	0	0	0.0109842	0	0.00612407	0	0.00259215	0.00385193	0.0039763	0	0	0	0	0	0.00476826	0	0	0	0.00305055	0	0	0.00527037	0	0	0	0.0024496
Rivularia	0	0	0	0	0	0	0	0	0	0	0	0	0.00434461	0	0	0	0	0	0.00334493	0	0	0	0.00419533	0	0	0	0	0	0	0	0	0	0	0	0	0	0	0	0	0	0	0	0	0	0	0	0	0	0
Robiginitalea	0	0	0	0	0	0	0	0.00390701	0	0	0	0	0	0	0	0	0	0.00291239	0.00334493	0	0	0	0.00419533	0	0	0	0	0	0	0	0	0.0039763	0	0	0	0	0	0.00476826	0	0.00233514	0	0	0	0	0	0	0	0	0
Roseateles	0	0	0	0	0	0.00279861	0.00306673	0.00390701	0	0	0.00631552	0	0	0.00283817	0	0.00429461	0	0	0.00334493	0.00419076	0	0	0.00419533	0.00313421	0	0.0109842	0	0	0.00579374	0	0	0.0039763	0	0.00413496	0	0	0	0	0.00819404	0	0	0.00610109	0	0	0	0	0	0.00344828	0
Roseburia	1.07801	0.164438	6.50673	1.20251	0.644441	0.903952	2.68952	0.918148	8.7406	1.08845	0.565239	5.61851	0.247643	0.94511	4.39971	1.80374	7.14714	1.16787	1.23428	1.2698	1.73569	4.96126	1.40963	3.73911	1.14547	3.37764	0.849086	1.59532	3.04171	4.35481	0.612457	8.89896	0.668671	1.48859	0	1.17575	0.286159	1.55445	0.692396	1.6346	2.34079	3.12681	0.926787	0.989997	3.54696	0.546227	0.587717	0.806897	3.06445
Roseibacterium	0	0	0.00436986	0.0033036	0	0.00279861	0.00613346	0	0	0.00391527	0	0	0	0	0	0	0	0.00582479	0	0	0.00582445	0	0	0	0	0	0	0.00306204	0.00289687	0	0	0	0	0	0	0	0	0	0.00409702	0	0	0	0	0	0	0	0	0	0
Roseiflexus	0	0	0.00436986	0	0	0	0	0	0	0	0.00315776	0	0	0	0	0	0	0	0	0.00419076	0	0	0	0	0	0	0	0	0.00289687	0	0	0	0	0	0	0	0	0	0	0	0	0	0	0	0	0	0.00367323	0	0.0024496
Roseobacter	0.0033583	0	0	0.0033036	0.00507434	0	0	0.00390701	0.00840442	0.00391527	0	0	0	0	0	0	0	0.00291239	0	0	0	0	0	0	0	0	0	0	0	0	0	0.0039763	0	0	0	0	0	0	0	0.00233514	0	0.00610109	0	0	0	0	0	0	0
Roseomonas	0.00671659	0	0.0131096	0.0033036	0	0.00279861	0.0092002	0.00390701	0	0.0117458	0	0	0	0	0	0	0.009996	0.00291239	0.0100348	0	0.00582445	0	0.00419533	0.00313421	0	0.00549209	0	0.00306204	0.00869061	0	0	0.0039763	0	0	0	0.004703	0	0	0	0.00233514	0.00647522	0.00305055	0	0	0.0105407	0	0.00367323	0	0.0073488
Roseovarius	0	0	0.00436986	0	0	0.00279861	0.00306673	0	0	0	0	0	0	0.00283817	0	0	0	0.00291239	0.00334493	0	0	0	0	0	0	0	0	0	0	0	0	0	0	0	0	0	0	0	0	0	0	0	0	0	0	0	0	0	0
Rothia	0.0134332	3.24549	0.00873973	4.37066	0.030446	0.0895556	0.0398675	0.359445	0.365592	0.0195764	0.694708	1.26496	0.00434461	0.0312198	0.0284114	0.0472407	0.014994	0.0553355	0.45491	0.372978	7.9562	0.0297081	0.109079	0.0125368	2.40436	0.0439367	0.849086	0.192908	0.19409	0.0207372	0.0308155	0.278341	0.0674805	0.955177	0.261476	3.9082	0.0995334	0.0381461	0.512127	0.0186811	0.0615146	0.0488088	0.00689061	0.0481248	0.268789	17.6006	0.0110197	0.224138	0.161674
Rubinisphaera	0	0	0	0	0	0	0	0	0	0	0.00315776	0	0	0	0	0	0	0	0.00334493	0	0.00582445	0	0	0	0	0	0	0	0.00289687	0	0.00385193	0	0	0	0	0	0	0	0.00409702	0	0	0	0	0	0	0	0	0	0
Rubrivivax	0.0033583	0	0.0131096	0.0099108	0	0.00559722	0.00306673	0	0.00420221	0	0.00315776	0.00527065	0	0	0.00811754	0.00429461	0	0.00291239	0.00334493	0.00419076	0	0	0.00419533	0.00313421	0.00378043	0.00549209	0	0	0.00869061	0.00259215	0.00385193	0	0	0.0124049	0	0.004703	0	0.00476826	0.00409702	0.00467028	0.00323761	0.00610109	0	0.00687498	0	0	0.00367323	0	0.0024496
Rubrobacter	0	0	0.00873973	0.0066072	0	0	0.00306673	0	0	0	0	0	0	0	0	0.00429461	0	0.00291239	0	0	0.00582445	0	0.00419533	0	0	0	0	0	0	0.00777645	0	0	0	0	0	0	0.00622084	0.00476826	0	0.00233514	0.00323761	0	0	0	0	0	0	0.00344828	0.0024496
Ruegeria	0	0	0.00436986	0	0	0	0	0	0	0	0.00315776	0	0	0	0	0	0	0	0	0	0	0	0	0	0	0	0	0.00306204	0	0	0	0	0.00613459	0	0	0	0	0	0	0	0.00323761	0	0	0.00343749	0	0	0.00367323	0.00344828	0
Rufibacter	0	0	0.00436986	0.0132144	0	0.00279861	0.00306673	0	0.00420221	0.00391527	0.00315776	0	0	0	0	0.00429461	0	0.00873718	0.00334493	0.00419076	0	0	0	0.00313421	0	0.00549209	0	0.00306204	0.00289687	0	0	0	0	0	0	0	0.00622084	0	0	0.00233514	0.00323761	0	0.00344531	0	0.00527037	0	0	0	0.0024496
Ruminiclostridium	0.0100749	0.00865464	0.0699178	0.0363396	0.0101487	0.0307847	0.0337341	0.0312561	0.0378199	0.0469833	0.0347354	0.00527065	0.0173785	0.0198672	0.0608816	0.0472407	0.07497	0.0320363	0.0568638	0.0335261	0.0349467	0.0198054	0.0167813	0.0282079	0.0151217	0.060413	0.0247908	0.0244963	0.066628	0.0596195	0.053927	0.0278341	0.00613459	0.0206748	0	0.032921	0.0435459	0.0429144	0.0532612	0.0350271	0.016188	0.033556	0.0241171	0.0240624	0.0263518	0.0505766	0.0330591	0.037931	0.0465424
Ruminococcus	0.167915	0.0216366	0.275302	0.548398	5.70863	0.111944	0.134936	0.156281	0.735387	0.36412	0.179992	0.100142	0.0260677	4.66027	0.344996	0.760146	5.4878	1.13583	0.598742	0.226301	0.250451	3.92642	0.180399	0.191187	0.181461	0.692004	1.54943	0.177598	2.9606	3.7975	0.157929	0.250507	0.0490767	0.136454	0	0.18812	0.161742	0.910738	0.31547	2.69709	0.113316	0.329459	0.144703	2.97687	0.163381	4.25855	0.11387	2.99655	0.913701
Rummeliibacillus	0	0	0.00436986	0.0033036	0	0.00279861	0.00306673	0	0	0.00391527	0.00315776	0	0	0	0	0	0.004998	0	0	0	0.00582445	0	0	0.00313421	0.00378043	0	0	0	0	0.00259215	0	0	0	0	0	0	0	0	0.00409702	0	0	0	0.00344531	0	0	0	0.00367323	0	0.0024496
Runella	0.0033583	0.00432732	0	0.0033036	0	0.00279861	0	0	0	0	0.00315776	0	0	0	0	0	0	0	0.00334493	0	0	0	0.012586	0	0	0	0	0	0	0.0051843	0	0	0	0	0	0	0	0	0.00409702	0	0.00647522	0.00305055	0.00344531	0	0	0	0	0.00344828	0.0048992
Saccharomonospora	0	0	0.00436986	0	0.00507434	0.00279861	0.00306673	0.00390701	0.00840442	0.00391527	0	0	0	0	0.00405877	0	0	0	0	0	0.00582445	0	0.00419533	0.00313421	0	0.00549209	0	0.00306204	0.00289687	0.00777645	0.00385193	0.0039763	0	0.00413496	0	0.004703	0	0.00953653	0.00819404	0.00934056	0.00647522	0	0	0	0	0	0.00367323	0	0
Saccharophagus	0	0	0	0.0033036	0	0	0	0	0	0	0	0	0	0	0	0.00429461	0	0	0.00334493	0	0	0	0	0	0	0	0.00309885	0	0.00289687	0	0	0	0	0	0	0.004703	0	0	0	0	0	0	0.00344531	0	0	0	0	0	0.0024496
Saccharopolyspora	0	0	0	0.0066072	0.00507434	0.00279861	0	0.00390701	0.00420221	0.00391527	0	0	0	0.00283817	0.00405877	0	0	0.00291239	0	0.00419076	0	0	0	0.00626841	0	0	0.00619771	0	0.00289687	0	0	0.0039763	0	0	0	0	0	0.00476826	0	0.00233514	0	0.00305055	0.00344531	0	0.00527037	0	0	0	0
Saccharothrix	0	0	0.00436986	0	0	0	0	0	0	0	0	0	0	0	0	0	0.004998	0	0.00334493	0	0	0	0	0	0	0.00549209	0	0	0	0	0.00385193	0	0	0	0	0.004703	0	0	0.00409702	0	0	0.00610109	0	0	0	0.0101153	0	0.00344828	0
Salegentibacter	0.0033583	0.00432732	0.00873973	0	0	0.00279861	0.00306673	0	0	0	0	0	0.00434461	0	0	0.00429461	0.004998	0	0	0	0	0	0.00419533	0	0	0	0.00309885	0	0	0.00259215	0	0.0079526	0	0	0	0	0	0.00476826	0	0	0.00323761	0.00305055	0.00344531	0	0	0	0	0.00344828	0.0048992
Salimicrobium	0.0033583	0	0	0	0	0	0.00613346	0.00390701	0.00420221	0	0	0	0	0	0.00405877	0.00858922	0.004998	0.00582479	0.00334493	0	0	0.00247568	0.00839067	0	0	0	0.00309885	0	0.0144844	0.00259215	0.00385193	0.0039763	0	0.00413496	0	0.00940601	0	0	0	0.00467028	0	0	0	0.00343749	0	0	0	0.00344828	0.0073488
Salinarchaeum	0	0	0.00436986	0	0	0	0	0	0	0.00391527	0	0	0	0	0.00405877	0	0	0.00291239	0.00334493	0	0	0	0	0	0	0	0	0	0	0	0	0	0	0	0	0	0	0	0.00409702	0	0	0	0	0	0	0	0	0	0
Salinibacter	0.0033583	0	0.00436986	0	0.00507434	0	0.00306673	0.00390701	0.00420221	0	0.00631552	0.00527065	0	0	0.00405877	0.00429461	0	0	0	0	0	0	0.00419533	0.00313421	0	0	0	0	0.00289687	0.0051843	0.00385193	0.0079526	0	0	0	0	0.00622084	0	0.00819404	0.00467028	0	0.0122022	0	0	0	0	0.00367323	0.0103448	0.0048992
Salinicoccus	0.0033583	0	0	0	0	0	0.00306673	0.00390701	0	0	0	0	0.00434461	0.00283817	0.00405877	0	0.009996	0	0.00334493	0.00419076	0	0	0	0.00313421	0	0.00549209	0	0	0	0	0	0	0	0	0	0	0.0124417	0.00476826	0	0.00233514	0	0.00610109	0.00344531	0	0	0	0.00367323	0.00344828	0
Salinispira	0	0	0	0	0	0	0	0.00390701	0	0	0.00315776	0	0	0	0.00811754	0	0	0	0.00668986	0	0	0	0	0.00626841	0	0	0.00309885	0	0	0	0	0	0	0	0	0	0	0.00476826	0	0	0.00323761	0.00305055	0	0	0	0	0	0.00344828	0.0048992
Salinispora	0	0	0	0	0	0	0	0.00390701	0.00420221	0.00391527	0	0	0	0	0	0.00429461	0.004998	0	0.00334493	0	0	0	0	0	0	0.0109842	0	0.00612407	0.00289687	0	0	0	0	0	0	0	0	0	0	0	0	0.00305055	0.00344531	0	0	0	0	0	0.0024496
Salinivirga	0	0	0	0.0033036	0	0	0	0	0	0	0	0	0	0	0	0	0	0.00291239	0	0	0	0	0	0.00313421	0	0.0109842	0	0	0	0	0	0	0	0	0	0	0	0	0	0	0.00323761	0.00305055	0	0	0	0	0	0	0.0024496
Salmonella	0.00671659	0	0.00436986	0.0033036	0.0507434	0.00839584	0.046001	0.0507912	0.00420221	0.0117458	0.012631	0.121225	0.0173785	0.0113527	0.0162351	0.0128838	0.014994	0.00291239	0.00334493	0	0.0232978	0.00495135	0.00419533	0.00313421	0	0.00549209	0.00309885	0.0581787	0.0405562	0.0285137	0.0269635	0.0039763	0	0.0868343	0.0290529	0.014109	0.248834	0.00953653	0	0.0864001	0.00323761	0.00610109	0.0137812	0.161562	0	0.0404613	0.00367323	0.0275862	0.0269456
Sandaracinus	0.0033583	0	0	0	0	0	0.00306673	0.00390701	0	0	0	0	0	0	0.00405877	0	0	0	0.00334493	0	0	0	0.00419533	0.00313421	0	0	0.00619771	0	0.00289687	0.0051843	0	0.0039763	0	0	0	0.00940601	0	0.00476826	0	0.0116757	0	0.00610109	0	0	0	0	0	0.00344828	0.0024496
Sanguibacter	0	0	0	0.0033036	0	0	0	0	0	0	0.00315776	0	0	0	0	0.00429461	0	0	0.00334493	0	0.00582445	0	0	0.00313421	0	0.00549209	0	0	0	0	0.00385193	0	0.0122692	0	0	0	0	0.00476826	0.00819404	0.00233514	0	0.00305055	0.00344531	0	0	0	0.00367323	0	0
Sap6virus	0	0	0	0	0	0	0	0	0	0	0	0	0	0	0	0	0	0	0	0	0	0	0	0	0	0	0	0	0	0	0	0	0	0	0	0	0	0	0	0	0	0	0	0	0	0	0	0	0
Saprospira	0	0	0	0	0	0	0	0	0.00420221	0	0	0	0	0	0	0	0	0	0	0	0	0	0	0	0	0	0	0	0.00289687	0.00259215	0	0	0	0	0	0	0	0	0	0	0	0	0	0	0	0	0	0	0
Scardovia	0	0	0	0	0	0	0	0	0	0	0	0	0	0	0.00405877	0	0	0	0.00334493	0	0.00582445	0.00247568	0.00419533	0	0	0	0.00309885	0	0	0.00259215	0	0.0039763	0.0122692	0	0	0.00940601	0	0	0	0.00934056	0	0	0	0.00343749	0	0	0	0	0
Scutavirus	0	0	0	0	0	0	0	0	0	0	0	0	0	0	0	0	0	0	0	0	0	0	0	0	0	0	0	0	0	0	0	0	0.00613459	0	0	0	0	0	0	0	0	0	0	0	0	0	0	0	0
Scytonema	0	0	0	0.0033036	0.00507434	0	0	0	0	0.00391527	0.00315776	0	0	0	0	0	0	0	0.00668986	0	0.00582445	0	0	0	0	0.00549209	0.00309885	0.00306204	0	0	0	0	0	0	0	0	0	0.00953653	0	0	0	0	0.00344531	0	0	0.0101153	0	0	0
Se1virus	0	0	0	0	0	0	0	0	0	0	0	0	0	0	0	0	0	0	0	0	0	0	0	0	0	0	0	0.00306204	0	0	0	0	0	0	0	0	0	0	0	0	0	0	0	0	0	0	0	0	0
Sebaldella	0	0	0.00436986	0	0.00507434	0.00559722	0.00306673	0.00390701	0.00840442	0.00783055	0	0.00527065	0	0	0	0.00429461	0.004998	0	0.00334493	0	0	0.00247568	0	0	0.00756086	0	0.00929656	0	0.00869061	0	0.00385193	0.0039763	0.0184038	0.00413496	0	0.004703	0	0.00953653	0	0	0.00323761	0.00305055	0.00344531	0	0	0	0	0.00344828	0
Sedimenticola	0	0	0	0	0	0.00279861	0	0.00781403	0	0	0	0	0	0	0	0	0	0	0	0	0	0	0	0	0.00378043	0	0.00309885	0	0	0.0051843	0	0	0	0	0	0	0	0	0	0	0	0	0.00344531	0	0	0	0	0	0
Sediminicola	0	0	0	0	0	0.00279861	0	0	0	0	0	0	0.00434461	0	0	0	0	0.00291239	0	0	0	0	0	0	0	0	0	0	0	0	0	0	0	0	0	0	0	0	0	0	0	0	0	0	0	0	0	0	0
Sediminispirochaeta	0.0033583	0.00432732	0	0	0	0.00279861	0.00306673	0	0	0.00391527	0.00315776	0.0105413	0	0.00567634	0.00405877	0	0.009996	0.00291239	0.00668986	0.00419076	0.00582445	0	0.00839067	0	0	0	0	0	0.00579374	0.00259215	0	0	0	0	0	0.00940601	0	0.00953653	0	0.00233514	0.00971282	0.00610109	0	0	0	0	0.00367323	0	0.0024496
Segniliparus	0	0	0	0	0	0	0	0	0	0	0	0	0	0	0.00405877	0	0	0	0	0	0	0	0	0	0	0	0	0	0	0.0051843	0.00385193	0	0	0	0	0	0	0	0	0.00233514	0	0	0	0	0	0	0	0	0
Selenomonas	0.0604493	0.00865464	0.104877	0.0891972	0.0355204	0.0307847	0.0398675	0.0703262	0.100853	0.0822207	0.066313	0.0421652	0.0130338	0.0312198	0.0568228	0.541121	0.094962	0.0407735	0.0836232	0.0544799	0.0757179	0.0346595	0.100688	0.0720868	0.0226826	0.109842	0.0712736	0.0551167	0.10139	0.051843	0.0308155	0.0556682	0.441691	0.636785	0	0.0893571	0.037325	0.090597	0.131105	0.0700542	0.197494	0.061011	0.0585702	0.0378124	0.0527037	0.0101153	0.0257126	0.0793103	0.127379
Seonamhaeicola	0.00671659	0	0.00436986	0.0033036	0	0	0.00306673	0	0	0.00391527	0	0	0	0.00567634	0.00405877	0.00429461	0.004998	0.00291239	0.00334493	0.00419076	0.00582445	0	0.00419533	0.00313421	0.00378043	0.00549209	0	0	0.00579374	0.00259215	0	0.0039763	0	0	0	0	0	0	0	0.00233514	0.00323761	0.00305055	0.00344531	0	0	0	0	0	0
Sep1virus	0	0	0	0	0	0	0	0	0	0	0	0	0	0	0	0	0	0	0	0	0	0	0	0	0	0	0	0	0	0	0	0	0	0	0	0	0	0	0	0	0	0	0	0	0	0	0	0	0
Serinicoccus	0	0	0.00436986	0.0033036	0	0	0	0	0	0	0	0	0	0	0	0	0	0.00291239	0.00334493	0	0	0.00247568	0	0	0	0	0	0	0.00289687	0	0.00385193	0	0.00613459	0	0	0	0	0	0	0	0	0	0	0	0	0	0	0	0
Serratia	0.0134332	0.00432732	0.0349589	0.0297324	0.015223	0.0111944	0.0214671	0.0390701	0.0504265	0.0195764	0.0189466	0.0368945	0.00434461	0.0198672	0.0162351	0.0343569	0.029988	0.0262116	0.0100348	0.0167631	0.0174734	0.00742703	0.0209767	0.00940262	0.0189022	0.0384446	0.0185931	0.0306204	0.0260718	0.0129608	0.0269635	0.0238578	0.0245384	0.0206748	0	0.004703	0.0311042	0.0286096	0.0245821	0.0256865	0.0194256	0.0152527	0.0241171	0.0274999	0.0316222	0	0.0183661	0.0241379	0.0465424
Sfi11virus	0	0	0	0	0	0	0	0	0	0	0	0	0	0	0	0	0	0	0	0	0	0.00742703	0	0	0	0	0	0	0	0	0	0	0	0	0	0	0	0	0	0	0	0.00305055	0	0	0	0	0	0	0
Sfi21dt1virus	0	0	0	0	0	0	0	0.00781403	0	0	0	0	0	0	0.0121763	0	0	0	0	0	0	0	0	0	0.00378043	0	0.00309885	0	0	0	0	0	0	0	0	0	0	0	0	0	0	0.00610109	0	0.00687498	0	0.0101153	0	0	0
Shewanella	0.0100749	0.00432732	0.0131096	0.0099108	0	0.00839584	0.00613346	0.0156281	0.0168088	0.00783055	0.00315776	0	0.00434461	0.00283817	0	0	0.009996	0.00582479	0.0100348	0	0.00582445	0.00990271	0.00839067	0.00626841	0	0.0164763	0.00309885	0.00306204	0.0202781	0.0155529	0	0.0159052	0	0	0	0.004703	0	0.0190731	0.0163881	0.0116757	0	0.00915164	0.00344531	0.0103125	0.0105407	0	0.00734646	0.0137931	0.024496
Shigella	0	0	0	0	0	0	0	0.00781403	0	0	0	0	0	0	0	0	0	0	0	0	0	0	0	0	0	0	0	0	0	0	0	0	0	0.00826993	0	0	0	0	0	0	0	0	0	0	0	0	0	0	0
Shimwellia	0	0	0	0	0	0	0	0.00390701	0.00420221	0.00783055	0	0	0	0	0.00405877	0	0.004998	0	0	0.00419076	0	0	0	0	0	0	0.00309885	0	0.00579374	0	0.00385193	0	0	0.00826993	0	0	0.00622084	0	0.00409702	0.00233514	0.00323761	0.00610109	0.00344531	0	0	0	0	0.00344828	0.0048992
Shinella	0	0	0.00436986	0	0	0	0	0	0	0	0.00315776	0	0	0	0	0	0	0	0	0.00838153	0	0	0.00419533	0	0	0	0	0.00306204	0	0	0	0	0	0	0	0.004703	0	0	0	0.00233514	0	0	0.00689061	0	0	0	0	0	0.0097984
Siansivirga	0	0	0	0	0	0	0	0	0	0	0	0	0	0	0	0	0	0	0	0	0	0	0	0	0	0	0	0.00306204	0	0	0.00385193	0	0	0	0	0	0	0	0	0.00233514	0	0	0	0	0	0	0	0	0
Sideroxydans	0	0	0.00436986	0	0.00507434	0.00279861	0.00306673	0	0	0	0	0	0	0	0.00405877	0.00429461	0	0	0.00334493	0.00419076	0	0	0.00419533	0.00313421	0	0.00549209	0.00619771	0	0	0	0	0	0.00613459	0	0	0.004703	0.00622084	0	0	0	0.00323761	0.00305055	0	0	0	0	0	0.00344828	0
Simiduia	0	0	0.00436986	0.0033036	0	0	0.00306673	0	0	0	0	0	0	0.00283817	0	0	0	0	0	0	0	0	0.00839067	0	0	0.00549209	0	0.00306204	0	0.00777645	0	0	0	0	0	0	0	0.00476826	0	0	0	0	0	0	0	0	0	0	0
Simkania	0	0	0	0	0	0	0	0	0	0	0	0	0	0	0	0	0	0	0	0	0	0	0	0	0	0	0	0	0	0	0	0	0	0	0	0	0	0	0	0	0	0	0	0	0	0	0	0	0
Singulisphaera	0	0.00432732	0	0	0	0	0	0	0.00420221	0	0	0	0	0	0	0	0	0	0.00334493	0	0	0	0	0.00313421	0	0.00549209	0	0	0.00289687	0	0.00385193	0.0039763	0	0	0	0	0	0.00476826	0.00409702	0.00233514	0.00323761	0.00305055	0.00344531	0	0	0	0.00367323	0	0
Sinomonas	0	0	0	0	0	0	0	0	0	0.00391527	0	0	0	0	0	0	0	0	0	0	0	0	0	0	0	0	0	0	0	0	0	0	0.00613459	0	0	0	0	0	0	0	0	0.00305055	0	0	0	0	0	0	0.0024496
Sinorhizobium	0	0	0.00873973	0.0066072	0	0.0111944	0	0.00390701	0.00840442	0.00783055	0	0.00527065	0	0.0085145	0.0121763	0.00858922	0.004998	0	0.00334493	0	0.00582445	0.00247568	0.00419533	0.00313421	0	0.0109842	0.00929656	0	0.00579374	0	0.00385193	0.0119289	0.0122692	0.00413496	0	0	0.0124417	0	0.00819404	0.00700542	0.00323761	0.00610109	0.0103359	0.00687498	0	0	0.00367323	0.0137931	0.0048992
Sk1virus	0	0	0	0	0	0	0	0	0	0	0	0	0	0	0	0	0	0	0	0	0	0	0	0	0	0	0	0	0	0	0	0	0	0	0	0	0	0	0	0	0	0	0	0	0	0	0	0	0
Slackia	0.0302247	0	0.0393288	0.0132144	0	0.00279861	0.0214671	0.0234421	0.0336177	0.0195764	0.0221043	0.00527065	0.0217231	0.0085145	0.0284114	0.0429461	0.02499	0.029124	0.0301044	0.0167631	0.00582445	0.00495135	0.050344	0.0344763	0.0113413	0.0713972	0.0185931	0.00918611	0.0405562	0.0285137	0.0308155	0.0159052	0.0122692	0.00826993	0	0.0705451	0.130638	0.0524509	0.0368732	0.0350271	0.0226633	0.0518593	0.0241171	0.0206249	0.0316222	0.0303459	0.0330591	0.0241379	0.0269456
Smoothievirus	0	0	0	0	0	0	0	0	0	0	0	0	0	0	0	0	0	0	0	0	0	0	0	0	0	0	0	0	0	0	0	0	0	0	0	0	0	0	0	0	0	0	0	0	0	0	0	0	0
Sneathia	0	0	0	0	0.00507434	0.00559722	0.00306673	0	0.00420221	0	0.00315776	0.00527065	0	0	0.00811754	0.0128838	0.004998	0.00873718	0	0	0	0.00247568	0	0.00313421	0	0	0.00309885	0.00306204	0	0.00259215	0	0	0	0.00413496	0	0	0	0	0.00409702	0.00233514	0.00971282	0	0	0	0	0.0101153	0.0110197	0.00689655	0.0024496
Snodgrassella	0	0	0	0	0	0	0	0	0.00420221	0	0	0	0	0	0	0	0	0.00291239	0	0	0.00582445	0	0	0	0	0.00549209	0	0.00306204	0.00289687	0.00259215	0	0.0039763	0	0.00413496	0	0	0	0	0	0.00233514	0	0	0	0	0	0	0	0	0.0024496
Sodalis	0.0033583	0	0.00436986	0	0	0.0111944	0	0	0.00840442	0.00391527	0	0	0	0	0.00405877	0.00429461	0	0.00582479	0	0	0	0.00247568	0.012586	0.00313421	0.00378043	0.00549209	0	0.00612407	0.00579374	0	0.00385193	0.0039763	0	0	0	0	0.00622084	0.00953653	0.0163881	0.0140108	0	0.00610109	0.00344531	0.00343749	0	0	0	0.0103448	0.0048992
Solibacillus	0	0	0.00436986	0	0.00507434	0	0	0	0	0.00391527	0.00947328	0	0	0	0	0	0	0.00291239	0.00334493	0	0.00582445	0	0	0	0	0	0.00309885	0	0	0	0	0	0	0	0	0.004703	0	0.00476826	0.00409702	0.00233514	0.00647522	0	0.00344531	0	0	0.0101153	0	0.00344828	0
Solitalea	0	0	0	0	0	0	0	0	0	0	0	0	0.00434461	0	0.00811754	0	0	0	0	0	0.00582445	0.00247568	0	0.00313421	0	0.00549209	0	0	0.00579374	0	0	0	0	0	0	0	0	0.00476826	0	0	0.00323761	0	0	0	0	0	0	0	0.0024496
Sorangium	0.0033583	0	0.00436986	0.0033036	0	0.00559722	0	0.00781403	0.00420221	0	0.00315776	0.00527065	0	0	0.00811754	0	0.009996	0.0116496	0.00334493	0.00419076	0.0116489	0.00495135	0.00839067	0	0	0	0.00929656	0	0.00579374	0.00259215	0.00385193	0.0119289	0	0	0	0	0	0	0.0122911	0.00233514	0.00323761	0.0122022	0	0	0	0	0	0.0103448	0.0097984
Sp18virus	0	0	0	0	0	0	0	0	0	0	0	0	0	0	0	0	0	0	0	0	0	0	0	0	0	0	0	0	0	0	0	0	0	0	0	0	0	0	0	0	0	0	0	0	0	0	0	0	0
Sp6virus	0	0	0	0	0	0	0	0	0.00420221	0	0	0	0	0	0	0	0	0	0	0	0	0	0	0	0	0	0	0	0	0	0	0	0	0	0	0	0	0	0	0	0	0	0	0	0	0.0101153	0	0	0
Spbetavirus	0	0	0	0	0	0	0	0	0	0	0	0	0	0	0	0	0	0	0	0	0	0	0	0	0	0	0	0	0	0	0	0	0	0	0	0	0	0	0	0	0	0	0	0	0	0	0	0	0
Sphaerobacter	0	0	0	0	0	0	0	0	0	0	0	0	0	0	0	0	0	0	0	0	0	0	0	0	0	0	0	0	0	0	0	0	0	0	0	0	0	0	0	0	0	0	0	0	0	0	0	0	0
Sphaerobacter	0	0	0	0.0033036	0	0	0	0.00390701	0	0	0	0	0	0	0	0	0	0	0.00334493	0	0	0	0.00419533	0.00313421	0	0.00549209	0.00309885	0	0	0	0.00385193	0	0	0	0	0.004703	0	0	0.00409702	0.00467028	0	0	0.00344531	0	0	0	0	0.00344828	0.0048992
Sphaerochaeta	0.00671659	0	0.00436986	0.0066072	0.0101487	0.00839584	0.00613346	0.00390701	0.0168088	0.00391527	0.00631552	0.00527065	0.00434461	0	0	0.0128838	0.009996	0.00291239	0.00334493	0.00419076	0	0	0.012586	0.00313421	0	0	0.0185931	0.0122481	0.00579374	0.0103686	0	0.0039763	0.00613459	0	0	0	0	0	0.00409702	0.0140108	0.00647522	0.00915164	0.0103359	0.0103125	0.00527037	0	0.0110197	0	0.0097984
Sphaerospermopsis	0	0	0	0	0.00507434	0	0	0	0	0	0.00315776	0	0	0	0	0	0	0	0	0	0	0	0	0	0	0	0	0	0.00289687	0	0	0	0	0	0	0	0	0	0.00819404	0	0.00323761	0	0	0	0	0	0.00367323	0	0
Sphingobacterium	0.00671659	0	0	0.0033036	0.00507434	0.00839584	0.00306673	0.00781403	0.00840442	0.00391527	0.00631552	0.00527065	0.00434461	0	0.00405877	0	0.004998	0.0116496	0.0133797	0	0.00582445	0.00247568	0.00419533	0.00313421	0	0.00549209	0.00309885	0.00612407	0.00289687	0.0051843	0.00385193	0.0039763	0	0	0	0	0.00622084	0.00476826	0.0122911	0.00700542	0.00971282	0.00610109	0.0103359	0	0.0158111	0	0.00367323	0.00689655	0.0048992
Sphingobium	0.0167915	0.00432732	0.0218493	0.0297324	0.00507434	0.00839584	0.0092002	0	0	0.00391527	0.00315776	0	0.00434461	0.00283817	0.0284114	0.00858922	0.019992	0.0232992	0.0100348	0	0.00582445	0.00247568	0.0167813	0.0188052	0.00378043	0.0219684	0.00309885	0.00612407	0.0144844	0.00777645	0.0115558	0.0198815	0	0.00826993	0	0.00940601	0.00622084	0.0190731	0.0245821	0.0116757	0	0.0213538	0.0103359	0.0171874	0.0210815	0	0.0110197	0.0103448	0.0171472
Sphingomonas	0.00671659	0	0.0174795	0.0099108	0	0.00279861	0.00306673	0.011721	0.0168088	0.0117458	0	0	0.00868923	0	0.00811754	0.00429461	0.004998	0.014562	0	0.0125723	0.0174734	0.00742703	0.012586	0.00626841	0	0	0.0123954	0.0122481	0.0202781	0.00777645	0.00770386	0.0238578	0	0.0124049	0	0.004703	0.0124417	0.00953653	0.00819404	0.00934056	0.00647522	0.0122022	0.0103359	0	0.0210815	0	0.00734646	0.0103448	0.012248
Sphingopyxis	0.0100749	0	0	0.0099108	0.00507434	0	0.0092002	0.011721	0.0210111	0	0.012631	0	0.00434461	0	0.0121763	0.0128838	0.009996	0.00873718	0.00334493	0	0	0.00495135	0.0167813	0.00313421	0	0.0274605	0.00309885	0.00306204	0.00869061	0.0103686	0	0.0079526	0	0	0	0.014109	0.00622084	0.00953653	0.0245821	0.00700542	0	0.00915164	0.00344531	0.00343749	0.00527037	0	0.00367323	0.00344828	0.0097984
Sphingorhabdus	0.0033583	0	0	0	0	0.00279861	0	0.00390701	0	0	0	0.00527065	0	0	0	0.00429461	0	0.00291239	0.00334493	0.00419076	0	0	0.00419533	0	0	0.00549209	0	0	0.00289687	0.0051843	0	0.0039763	0	0	0	0	0	0	0.00409702	0	0	0.00305055	0.00344531	0.00343749	0	0	0	0.00344828	0
Spiribacter	0	0	0	0	0	0	0	0	0	0.00391527	0	0	0	0.00283817	0	0	0	0.00291239	0.00334493	0	0	0	0.00419533	0	0	0	0	0	0	0.00259215	0	0.0039763	0	0	0	0	0.00622084	0	0.00819404	0	0	0	0	0	0	0	0	0.00344828	0
Spirochaeta	0	0	0.00436986	0.0033036	0	0.00279861	0	0.00390701	0	0.00783055	0	0	0	0.00283817	0.00405877	0.00858922	0.009996	0.00582479	0.00668986	0	0.00582445	0	0.00419533	0.00313421	0	0	0.00309885	0.00306204	0.00579374	0	0	0.0079526	0	0	0	0.00940601	0	0.00953653	0.0163881	0.00233514	0.00323761	0.00915164	0	0	0.00527037	0	0	0	0.0048992
Spiroplasma	0.0033583	0	0	0	0.00507434	0.00559722	0	0.011721	0.00420221	0.00783055	0.012631	0	0	0	0.00811754	0	0.009996	0.00582479	0.0100348	0	0	0	0.00419533	0.00626841	0.00378043	0	0.0154943	0	0	0.0103686	0.00770386	0	0.0184038	0.0124049	0	0.004703	0.00622084	0.00476826	0.00819404	0.00700542	0.00647522	0.0152527	0.00689061	0.00687498	0.0158111	0.0202306	0.0146929	0.00344828	0.012248
Spirosoma	0	0.00432732	0	0.0033036	0	0.00279861	0	0.00390701	0	0.00391527	0.00315776	0.0105413	0.00434461	0	0.00405877	0.00429461	0.004998	0.00873718	0	0.00419076	0	0	0	0.00940262	0.00378043	0.00549209	0.0154943	0.00306204	0.00579374	0.0051843	0	0.0079526	0.00613459	0.00826993	0	0	0	0.00476826	0.0163881	0.00700542	0.00323761	0.00305055	0	0	0	0	0.00367323	0.0206897	0.012248
Spn3virus	0	0	0	0	0	0	0	0	0	0	0	0	0	0	0	0	0	0	0	0	0	0	0	0	0	0	0	0	0	0	0	0	0	0	0	0	0	0	0	0	0	0	0	0	0	0	0	0	0
Spongiibacter	0	0	0	0.0033036	0	0	0	0	0	0	0	0	0	0	0	0	0	0	0	0	0	0	0.00419533	0	0	0	0.00619771	0	0	0.00259215	0	0	0	0	0	0	0	0	0	0	0.00323761	0	0.00344531	0	0	0	0	0	0
Sporosarcina	0.0201498	0.00432732	0.00436986	0.0099108	0.00507434	0.00839584	0.00613346	0.00390701	0.0126066	0.00391527	0.00631552	0.00527065	0	0.00283817	0.0162351	0.0171784	0.019992	0.014562	0.0133797	0.00419076	0.00582445	0.00990271	0.00419533	0.0125368	0.0113413	0.0164763	0.00929656	0.0153102	0.00289687	0.0103686	0.00385193	0.0159052	0.00613459	0.0124049	0	0.014109	0	0.0143048	0.0122911	0.00934056	0.00971282	0.0122022	0.00344531	0.00343749	0.0105407	0	0.00367323	0.00344828	0.0048992
Stackebrandtia	0.0033583	0	0.00873973	0.0033036	0	0.00559722	0	0.00390701	0	0.00391527	0	0.00527065	0.00434461	0	0.00405877	0.00429461	0	0	0	0.00419076	0.0116489	0	0	0	0	0	0	0.00306204	0.00289687	0.00259215	0	0.0039763	0	0.00413496	0	0.00940601	0.00622084	0	0	0	0.00323761	0	0	0	0	0	0.00734646	0.00344828	0
Stanieria	0	0	0	0	0	0	0	0	0	0	0	0	0	0	0	0	0	0	0	0	0	0	0	0	0	0	0	0	0	0	0	0	0	0	0	0	0	0	0	0	0	0	0	0	0	0	0	0	0
Staphylococcus	0.0369413	0.0302912	0.0262192	0.0627684	0.0101487	0.0167917	0.0153337	0.011721	0.0336177	0.0352375	0.0568397	0.0158119	0.0173785	0.0085145	0.0649403	0.0214731	0.059976	0.0378611	0.0401391	0.0335261	0.0291223	0.00247568	0.050344	0.0407447	0.0151217	0.0494288	0.0650759	0.0183722	0.0405562	0.0414744	0.0154077	0.0159052	0.0368076	0.0620245	0.668216	0.042327	0.0622084	0.100134	0.0901344	0.0326919	0.0679898	0.0183033	0.0344531	0.01375	0.0316222	0.0101153	0.0293858	0.0137931	0.0514416
Stappia	0	0	0	0	0	0	0	0	0	0	0	0	0	0	0	0	0	0	0.00334493	0	0	0	0.00419533	0.00313421	0	0.00549209	0.00309885	0	0.00289687	0	0.00385193	0	0	0	0	0	0.00622084	0.00476826	0.00819404	0.00700542	0.00323761	0.00305055	0.00344531	0	0	0	0.00734646	0	0.0024496
Starkeya	0	0	0	0	0.00507434	0	0	0	0	0	0.00947328	0	0	0.00283817	0.00405877	0.00429461	0	0	0.00668986	0.00419076	0	0	0	0.00313421	0.00378043	0.00549209	0	0	0.00289687	0.00259215	0	0	0	0	0	0	0.00622084	0.00476826	0.00409702	0.00233514	0	0.00610109	0.00689061	0	0	0	0	0	0
Stenotrophomonas	0.00671659	0	0.0131096	0.0264288	0	0.00839584	0.00613346	0.0156281	0.0210111	0.0117458	0.00947328	0.0105413	0	0.0141908	0	0.00429461	0.019992	0.0203868	0.0200696	0.0125723	0.00582445	0.00742703	0.012586	0.0188052	0.00378043	0.00549209	0	0.0122481	0.0115875	0.00777645	0.00385193	0.0159052	0.0122692	0	0.0290529	0.042327	0.00622084	0.00476826	0.0122911	0.016346	0.00323761	0.0274549	0.00344531	0.0103125	0.0105407	0	0.00734646	0.0103448	0.0293952
Steroidobacter	0	0	0.00436986	0	0	0	0	0	0	0.00391527	0	0	0	0	0	0.00429461	0	0	0	0.00419076	0	0	0	0.00313421	0	0	0	0	0	0	0	0	0	0.00413496	0	0	0	0	0.00819404	0.00700542	0	0.00305055	0	0.00343749	0	0	0	0	0
Stigmatella	0.0033583	0	0.00436986	0.0033036	0	0	0	0.00390701	0.00420221	0.00391527	0.00947328	0	0	0	0.00405877	0	0	0.00582479	0	0	0	0	0.00419533	0	0	0	0	0.00306204	0.00869061	0	0	0.0119289	0	0	0	0.004703	0	0.00953653	0.00819404	0.00934056	0	0.00610109	0.00344531	0	0.0105407	0	0	0.00689655	0.0024496
Streptobacillus	0.0033583	0.00432732	0	0	0	0.00279861	0	0.00390701	0	0	0	0	0	0	0.00405877	0	0.004998	0	0	0	0	0	0	0	0	0	0	0	0	0.0051843	0	0	0	0.00413496	0	0	0.00622084	0	0	0	0.00323761	0	0	0	0.00527037	0	0	0	0
Streptococcus	14.4407	14.6307	0.581192	25.1569	13.4977	10.8894	6.76828	18.0035	6.31172	13.3707	6.43552	10.262	0.625625	13.2003	7.43973	13.3434	16.6533	12.7505	6.49585	22.2655	13.2099	10.6182	7.17822	13.7028	18.9286	12.846	11.1404	10.659	7.57242	8.56447	7.88876	5.76961	23.6795	7.79854	0.784428	13.587	24.112	19.464	8.46853	5.27741	13.6303	11.4426	0.196382	20.1059	24.133	20.8477	16.6654	6.56897	0.382138
Streptomyces	0.0134332	0.00432732	0.0786576	0.08259	0.015223	0.0419792	0.0368008	0.0312561	0.134471	0.117458	0.0505242	0.0421652	0	0.0255435	0.0974105	0.0558299	0.04998	0.0465983	0.0501739	0.0502892	0.0698934	0.0198054	0.0713207	0.0626841	0.00378043	0.060413	0.0681748	0.0244963	0.0608343	0.0544352	0.0308155	0.0914549	0.0613459	0.0413497	0.0871586	0.0470301	0.0933126	0.0286096	0.114716	0.0350271	0.0291385	0.0854153	0.0585702	0.0481248	0.0210815	0.0202306	0.0550984	0.0655172	0.073488
Streptosporangium	0	0	0.0131096	0	0	0.00279861	0	0.00390701	0.00420221	0	0.00947328	0	0.00434461	0.00567634	0	0	0.004998	0	0	0.00419076	0.0116489	0.00247568	0	0.00313421	0	0	0.00309885	0.00306204	0.00289687	0	0.00385193	0.0039763	0	0	0	0.004703	0.00622084	0.00476826	0.00819404	0	0	0.00305055	0	0.00343749	0	0	0	0.0103448	0.0024496
Sulfitobacter	0	0	0	0	0	0	0	0	0	0	0	0	0	0	0	0	0	0	0.00334493	0	0	0	0.00419533	0.00313421	0	0	0	0	0.00289687	0	0	0	0	0	0	0.004703	0	0	0	0	0	0.00305055	0.00344531	0	0	0	0	0	0
Sulfolobus	0	0	0	0	0	0	0	0	0	0	0	0	0	0	0	0	0.004998	0	0	0	0	0	0	0	0	0	0	0	0	0	0.00770386	0	0	0	0	0	0	0	0	0	0	0	0	0	0	0	0	0	0
Sulfuricaulis	0.0033583	0	0.00436986	0	0	0	0.00306673	0	0	0.00391527	0.00315776	0	0	0	0.00405877	0	0.009996	0	0.00334493	0	0	0	0.00419533	0.00313421	0	0.00549209	0	0	0	0.00259215	0.00385193	0	0	0	0	0	0	0.00476826	0.00409702	0.00233514	0	0	0	0	0	0.0101153	0.00367323	0	0.0073488
Sulfuricella	0.0033583	0	0	0	0	0	0	0.00390701	0	0	0	0	0	0	0	0	0	0	0	0	0.00582445	0	0	0	0	0	0	0	0	0	0	0	0	0	0	0	0	0	0.00409702	0	0	0.00305055	0	0	0	0.0101153	0	0	0.0024496
Sulfuricurvum	0	0	0.00873973	0	0	0	0	0	0	0.00783055	0	0	0	0	0	0	0	0	0	0	0	0	0	0.00313421	0	0	0	0	0	0	0	0	0	0	0	0	0	0	0	0	0	0.00305055	0	0	0	0	0	0	0
Sulfuriferula	0	0	0	0	0	0	0	0	0	0.00391527	0.00315776	0	0	0	0	0	0	0	0	0	0	0	0.00839067	0	0	0	0	0	0	0	0	0	0	0.00413496	0	0	0	0.00476826	0	0.00233514	0	0	0	0	0	0	0	0	0
Sulfurifustis	0	0	0.00873973	0	0	0	0	0.00390701	0	0.00391527	0.00631552	0	0	0	0.00405877	0	0	0	0	0	0	0.00247568	0	0.00313421	0	0	0	0	0	0	0	0	0.00613459	0	0	0	0	0.00476826	0.00409702	0	0	0	0	0	0	0	0.00367323	0	0
Sulfurihydrogenibium	0	0	0	0.0033036	0	0	0	0	0.00420221	0	0	0	0	0	0.00405877	0	0	0	0	0	0	0	0.00419533	0	0	0.00549209	0	0	0	0	0	0	0	0	0	0	0	0	0	0	0.00323761	0	0	0	0	0	0	0	0.0024496
Sulfurimonas	0.0033583	0.00432732	0.00436986	0.0033036	0.00507434	0.00279861	0	0	0.00840442	0.00391527	0.00315776	0	0.00434461	0	0	0.00858922	0	0	0.00334493	0.00419076	0	0	0.00419533	0	0	0.00549209	0	0.00306204	0.00579374	0.0051843	0	0	0.00613459	0	0	0.004703	0	0	0	0.00233514	0.00323761	0	0.00344531	0.00343749	0	0	0.00734646	0.00344828	0.0097984
Sulfuritalea	0.00671659	0	0	0	0	0.00279861	0.00306673	0	0.00420221	0	0	0	0	0	0	0.00429461	0	0	0.00668986	0	0	0	0.00419533	0	0	0.00549209	0	0	0.00579374	0.00259215	0	0.0039763	0	0	0	0	0.00622084	0	0	0	0.00323761	0	0	0	0.0105407	0	0	0.00344828	0
Sulfurospirillum	0.00671659	0.00432732	0	0	0.00507434	0.00559722	0	0.00781403	0.00420221	0	0	0.00527065	0	0.00283817	0	0.00429461	0.004998	0.00291239	0.0100348	0	0	0	0.00839067	0	0	0	0	0.00306204	0.00289687	0.00259215	0	0	0	0.00413496	0	0	0	0.00953653	0	0	0.00323761	0.00305055	0.00689061	0.00343749	0.00527037	0.0202306	0	0.00689655	0
Sulfurovum	0.0033583	0	0.00436986	0.0066072	0.00507434	0.00559722	0	0	0.00420221	0.00391527	0	0.00527065	0.00434461	0	0.00811754	0.00429461	0	0	0.00334493	0	0	0	0	0	0.00378043	0.00549209	0.00309885	0.00612407	0.00579374	0	0.00385193	0	0	0.00413496	0	0	0	0	0.00819404	0	0.00323761	0.00610109	0.0103359	0	0.00527037	0	0	0.00344828	0.0073488
Symbiobacterium	0.0100749	0	0.0349589	0.0066072	0	0.00279861	0.00306673	0.011721	0.0126066	0.0195764	0.0157888	0.0105413	0.00434461	0.0113527	0.0162351	0	0.009996	0.00873718	0.0100348	0	0	0.00495135	0.0167813	0.015671	0.00756086	0.0164763	0.00929656	0.00306204	0.00579374	0.0103686	0.00385193	0.0238578	0	0	0	0.004703	0.00622084	0.0143048	0.00409702	0.00700542	0.016188	0.0244044	0.00344531	0.00687498	0.00527037	0.0101153	0.0146929	0.0137931	0.0024496
Synechococcus	0.0167915	0	0.0262192	0.016518	0.00507434	0.0139931	0.00613346	0.0312561	0.0378199	0.0234916	0.012631	0.0105413	0.00434461	0.00567634	0.0243526	0.0128838	0.02499	0.0174744	0.0200696	0.00838153	0.0291223	0.00990271	0.0209767	0.0250737	0.0226826	0.0219684	0.0185931	0.00612407	0.00869061	0.0207372	0.00385193	0.0318104	0.0122692	0.00826993	0	0.032921	0.0186625	0.0190731	0.0286791	0.0256865	0.016188	0.0305055	0.0172265	0.0206249	0.0158111	0.0202306	0.0330591	0.0310345	0.0293952
Synechocystis	0	0	0	0.0033036	0	0	0.00306673	0	0	0	0	0	0	0.00283817	0	0	0	0	0	0	0	0	0	0.00313421	0	0	0	0	0	0	0	0	0.00613459	0.00413496	0	0	0	0	0	0	0	0	0	0.00343749	0.00527037	0	0	0	0
Syntrophobacter	0	0	0	0	0	0.00279861	0	0	0	0.00391527	0.00631552	0	0	0	0	0	0	0.00291239	0.00334493	0.00419076	0	0	0	0.00313421	0.00378043	0	0.00309885	0	0	0.00259215	0	0.0159052	0	0	0	0.004703	0	0	0.00409702	0.00467028	0	0	0.00344531	0	0.00527037	0	0	0	0
Syntrophobotulus	0.0033583	0	0.0131096	0	0	0.00279861	0	0.00781403	0.00420221	0	0.00947328	0	0	0.00283817	0	0	0	0.00291239	0.00668986	0.00419076	0	0.00247568	0.00419533	0.00313421	0	0	0.00619771	0	0.00579374	0.00259215	0.00385193	0.0119289	0.0122692	0	0	0	0.00622084	0.00953653	0.00409702	0.00700542	0.00323761	0.00305055	0	0	0.00527037	0	0.00367323	0	0.0048992
Syntrophomonas	0	0	0	0	0	0	0	0	0.00420221	0	0	0	0	0	0	0	0	0	0.00334493	0	0	0	0.00419533	0	0	0	0	0.00306204	0	0	0.00385193	0.0039763	0	0	0	0	0	0.00476826	0.00409702	0	0	0	0.00344531	0.00687498	0	0	0	0.00344828	0
Syntrophothermus	0	0	0	0	0	0	0	0	0.00420221	0	0.00315776	0	0	0	0	0	0	0.00582479	0	0	0	0	0	0	0	0	0	0	0	0.00259215	0	0	0	0	0	0	0	0	0.00409702	0.00233514	0	0	0	0	0	0	0	0	0
Syntrophus	0	0	0	0	0	0	0	0.00781403	0.00420221	0	0.00315776	0	0.00434461	0	0	0.00429461	0	0.00291239	0	0.00419076	0	0	0	0	0	0.00549209	0	0	0	0	0	0	0	0	0	0	0.00622084	0	0	0	0	0	0.00689061	0.00343749	0	0	0.00367323	0	0
T4virus	0	0	0	0	0	0	0	0	0	0	0	0	0	0	0	0	0	0	0	0	0	0	0	0	0	0	0	0	0	0	0	0	0	0	0	0	0	0	0	0	0	0	0	0	0	0	0	0	0
T5virus	0	0	0	0	0	0	0	0	0	0	0	0	0	0	0	0	0	0.00291239	0	0	0	0	0	0	0	0	0	0	0	0	0	0	0	0	0	0	0	0	0	0	0	0	0	0	0	0	0	0	0
T7virus	0	0	0	0	0	0	0	0	0	0	0	0	0	0	0	0	0	0	0	0	0	0	0	0	0	0	0	0	0	0	0	0	0	0	0	0	0	0	0	0	0	0	0	0	0	0	0	0	0
Tannerella	0.057091	0.0173093	0.0393288	0.0528576	0.015223	0.0223889	0.0490677	0.011721	0.0630332	0.043068	0.0347354	0.0158119	0.00868923	0.0198672	0.0365289	0.0429461	0.034986	0.0262116	0.0334493	0.0377169	0.0174734	0.0445622	0.0419533	0.0658183	0.0151217	0.0549209	0.0247908	0.0153102	0.0289687	0.0492509	0.0192597	0.0318104	0.0920189	0.0206748	0	0.0470301	0.037325	0.0143048	0.0655523	0.0420325	0.0453265	0.0457582	0.0275624	0	0.0316222	0	0.0146929	0.0586207	0.0391936
Tateyamaria	0	0	0	0.0033036	0	0	0	0	0	0	0	0	0	0	0	0	0	0	0	0	0	0	0	0	0	0	0	0	0	0	0	0.0039763	0	0	0	0	0	0	0	0.00233514	0	0	0.00344531	0	0	0	0	0	0
Tatlockia	0	0	0	0	0	0	0	0	0	0	0	0	0	0	0	0	0	0	0	0	0	0	0	0	0	0	0	0	0	0.00259215	0	0	0	0	0	0	0	0	0	0	0	0	0	0	0	0	0	0	0
Tatumella	0.0033583	0	0.00436986	0.0033036	0	0	0	0	0	0	0	0	0	0	0	0	0	0	0.00334493	0.00419076	0	0	0.00419533	0.00313421	0	0	0.00309885	0	0.00289687	0	0	0	0	0	0	0	0	0	0.00409702	0.00467028	0	0	0.00344531	0	0	0	0	0.00344828	0
Taylorella	0.0033583	0	0	0	0	0.00279861	0.00306673	0.00390701	0	0	0.00315776	0.00527065	0.00434461	0.00283817	0	0	0.004998	0.00291239	0	0	0.0116489	0	0	0	0	0.00549209	0	0	0	0.00259215	0	0.0039763	0	0	0	0	0	0	0	0	0	0.00305055	0	0	0.0105407	0	0.00734646	0	0
Tenacibaculum	0.0033583	0.00865464	0	0	0	0	0	0	0	0.00391527	0	0	0	0	0	0.00429461	0	0.00291239	0	0	0	0	0.00419533	0	0	0	0	0.00306204	0	0	0	0	0	0	0	0	0	0.00476826	0	0	0	0	0	0	0	0	0	0	0
Tepidanaerobacter	0	0	0	0.0033036	0	0	0	0.00390701	0.00840442	0	0	0	0	0	0	0.00429461	0.009996	0.00291239	0	0	0	0	0.00839067	0.00313421	0	0	0	0.00306204	0.00289687	0	0.00385193	0	0.00613459	0	0	0.00940601	0	0.00953653	0	0.00233514	0.00647522	0.00305055	0.00344531	0	0	0	0	0.00689655	0.0073488
Teredinibacter	0	0.00865464	0	0	0	0	0	0	0	0	0	0	0	0	0	0	0	0	0	0	0	0	0	0	0	0	0	0	0	0	0	0	0	0	0	0	0	0	0	0	0	0.00305055	0	0	0	0	0	0	0
Terribacillus	0	0	0	0	0	0	0.00306673	0	0	0.00391527	0	0	0	0	0	0.00429461	0	0	0	0	0	0	0	0	0	0	0	0.00306204	0	0.00259215	0	0.0039763	0	0.00413496	0	0	0	0.00953653	0	0	0	0	0	0	0	0	0	0	0.0048992
Terriglobus	0	0	0.0174795	0.0066072	0	0.00559722	0.00306673	0	0.00840442	0.0117458	0	0	0	0.00567634	0.00405877	0	0.004998	0.00582479	0.00334493	0.00419076	0.00582445	0	0	0	0.00378043	0	0	0	0.0144844	0.0051843	0.00770386	0.0079526	0	0	0	0.004703	0.0186625	0.00476826	0.00819404	0.00467028	0	0.00610109	0.00344531	0.0171874	0	0	0	0.0103448	0.0024496
Tessaracoccus	0.00671659	0	0.0349589	0.0264288	0.00507434	0.00559722	0.00613346	0.00781403	0.00420221	0.0117458	0.00315776	0	0	0.00567634	0.0162351	0.00858922	0.014994	0.00873718	0.0133797	0.00419076	0.0116489	0.00247568	0.00839067	0	0.00756086	0	0.00929656	0.0122481	0.0144844	0.00777645	0.00770386	0.0079526	0.0122692	0.0248098	0	0.014109	0.0124417	0.00476826	0.0327761	0.00700542	0.00323761	0.0152527	0.00689061	0.0103125	0.0158111	0.0101153	0.00367323	0.00689655	0.0097984
Tetragenococcus	0	0.00432732	0	0.0033036	0	0	0	0	0.00420221	0.00391527	0.00631552	0	0	0	0.00405877	0	0	0.00291239	0.00334493	0	0	0.00247568	0.00419533	0	0.00378043	0.00549209	0	0	0.00579374	0.0051843	0	0.0039763	0	0.00826993	0	0	0	0	0.00819404	0.00233514	0.00323761	0	0	0	0	0	0	0	0.0048992
Tg1virus	0	0	0	0	0	0	0	0	0	0	0	0	0	0	0	0	0	0	0	0	0	0	0	0	0	0	0	0	0	0	0	0	0	0	0	0	0	0	0	0	0	0	0	0	0	0	0	0	0
Thalassolituus	0.0033583	0	0	0	0	0.00279861	0	0.00390701	0.00840442	0	0	0.00527065	0	0.00283817	0	0	0.004998	0.00582479	0.00334493	0.00419076	0.00582445	0	0	0	0	0	0	0.00306204	0	0.00259215	0	0.0039763	0	0.00413496	0	0	0	0	0	0.00233514	0	0.00305055	0	0	0.00527037	0	0.00367323	0.00344828	0.0024496
Thalassospira	0.0033583	0	0.00436986	0.0033036	0	0.00279861	0	0.00390701	0	0	0.00315776	0.00527065	0	0.00283817	0	0	0.004998	0.00291239	0	0	0	0	0	0.00313421	0	0	0	0.00306204	0	0	0	0.0039763	0	0	0	0.004703	0	0.00476826	0.00409702	0	0	0	0.00344531	0	0	0	0.00367323	0	0.0024496
Thalassotalea	0	0	0	0	0	0	0	0	0	0.00391527	0	0	0	0	0	0	0	0	0	0	0	0	0	0	0	0	0	0	0	0	0	0	0	0	0	0	0	0	0	0	0	0	0	0	0	0	0	0	0
Thauera	0.00671659	0	0.00436986	0.0099108	0.0101487	0.00559722	0.0122669	0.0273491	0.0336177	0	0.00947328	0.00527065	0	0.0085145	0.0243526	0.00858922	0.014994	0.0174744	0.0200696	0.00838153	0	0.00742703	0.025172	0.015671	0.00378043	0.0274605	0.0154943	0.00306204	0.0202781	0.00777645	0.00770386	0.0119289	0.00613459	0.0124049	0	0.004703	0.00622084	0.0238413	0.0204851	0.00467028	0.016188	0.0213538	0.0103359	0	0.00527037	0	0.00367323	0.0137931	0.0195968
Thermacetogenium	0	0	0.00436986	0	0.00507434	0	0.00306673	0	0	0	0	0	0	0.00567634	0	0	0	0.00291239	0.00334493	0.00419076	0	0	0.00419533	0.00313421	0.00756086	0.00549209	0.00619771	0	0	0	0.00770386	0	0	0.00413496	0	0	0.00622084	0	0.00819404	0	0.00323761	0	0.00689061	0	0.00527037	0	0	0	0
Thermaerobacter	0.0033583	0	0.0218493	0	0.00507434	0.00279861	0.00306673	0.00781403	0	0	0.0189466	0	0	0	0.0121763	0	0	0	0.00668986	0	0.00582445	0	0.00419533	0.00626841	0	0.0164763	0.00309885	0.00306204	0	0	0.00385193	0.0079526	0	0	0	0	0	0	0	0.00700542	0.00971282	0.00305055	0.00344531	0	0	0	0.00367323	0.00689655	0
Thermanaeromonas	0	0	0	0	0	0	0	0.00390701	0	0.00391527	0	0	0	0	0	0	0	0	0	0	0	0	0	0	0	0	0.00619771	0	0.00289687	0	0	0	0	0	0	0	0	0	0	0	0	0.00610109	0	0	0	0	0	0	0
Thermanaerovibrio	0	0	0.00436986	0.0033036	0	0.00279861	0.00613346	0	0.00840442	0.00783055	0	0	0	0	0.00811754	0	0.004998	0.00291239	0	0	0	0	0.012586	0.00313421	0	0	0	0.00306204	0	0	0.00385193	0.0039763	0	0	0	0	0.00622084	0	0	0.00467028	0	0.00610109	0	0.00343749	0	0	0.00367323	0	0
Thermincola	0	0	0	0	0	0.00559722	0	0	0	0	0.00631552	0	0	0	0	0	0.004998	0.00291239	0.00334493	0	0	0	0	0.00313421	0	0.00549209	0	0.00306204	0.00289687	0.00259215	0	0.0159052	0	0	0	0	0.00622084	0	0.00409702	0.00467028	0.00323761	0.00610109	0	0.00687498	0	0	0	0	0.0048992
Thermoanaerobacter	0	0	0.00436986	0	0.0202974	0.00279861	0	0.00390701	0.00840442	0.00391527	0	0.00527065	0.00434461	0.00283817	0.0121763	0.00429461	0.009996	0.00291239	0	0.00419076	0.00582445	0	0	0	0.00756086	0	0.00929656	0	0.00289687	0	0.00385193	0	0.00613459	0.00413496	0	0	0	0.00476826	0	0.00467028	0.00323761	0.00305055	0.00344531	0.00343749	0	0	0	0	0.0048992
Thermoanaerobacterium	0.0033583	0	0.00873973	0.0033036	0.00507434	0.00559722	0.00306673	0.00390701	0.00420221	0	0	0	0	0.00567634	0.00405877	0.00858922	0.014994	0.00582479	0.0100348	0.00419076	0	0	0.00419533	0.00313421	0.00378043	0.00549209	0.00619771	0.00612407	0.00289687	0.0103686	0.00770386	0.0039763	0.0184038	0.00413496	0	0.004703	0.00622084	0.00476826	0.00409702	0.0116757	0.00323761	0.00610109	0.00344531	0.00687498	0	0.0202306	0	0.00344828	0.0048992
Thermobacillus	0.0033583	0	0.00436986	0.0033036	0	0.00559722	0.00306673	0	0.0168088	0.0117458	0.0157888	0.00527065	0	0.00283817	0.00811754	0	0	0.00291239	0.00668986	0.00419076	0	0	0	0.00313421	0.00378043	0.00549209	0.0123954	0.00306204	0.00579374	0.00259215	0	0.0039763	0	0.00413496	0	0.014109	0	0	0.0163881	0.00467028	0	0.00305055	0.00689061	0	0	0	0.0110197	0.0103448	0.0146976
Thermobaculum	0	0	0	0	0	0	0	0	0	0	0.00315776	0	0	0	0	0	0	0	0	0	0	0	0	0	0	0	0	0	0	0	0	0	0	0.00413496	0	0	0	0	0	0	0	0	0	0	0	0	0	0	0
Thermobifida	0	0	0.00436986	0	0	0.00279861	0	0	0.00420221	0	0	0	0	0	0	0	0	0	0.00334493	0	0	0.00247568	0	0.00313421	0.00378043	0	0	0.00306204	0	0	0	0	0	0	0	0	0	0	0.00819404	0.00467028	0	0.00305055	0	0	0	0	0	0	0
Thermobispora	0	0	0	0	0	0	0	0	0	0	0.00315776	0	0	0	0	0.00429461	0	0.00291239	0	0	0	0	0	0	0	0	0	0	0	0	0	0	0.00613459	0	0	0	0	0	0	0	0	0	0	0	0	0	0.00367323	0	0.0024496
Thermococcus	0.0033583	0	0	0.0066072	0.00507434	0.00559722	0.00306673	0.00781403	0	0.00391527	0	0	0	0.00283817	0	0	0.004998	0	0.00334493	0	0	0	0.00419533	0	0	0.00549209	0.00309885	0	0	0.0051843	0.00385193	0.0039763	0	0	0.0290529	0	0.00622084	0	0.00409702	0.00233514	0	0	0.00689061	0.00343749	0.00527037	0	0.00367323	0	0.0073488
Thermocrinis	0	0	0	0	0	0	0	0	0	0.00391527	0	0.00527065	0	0	0	0	0	0	0	0.00419076	0	0	0	0	0	0	0.00309885	0	0	0	0	0	0	0	0	0	0	0	0	0	0	0	0	0	0	0.0101153	0	0	0
Thermodesulfatator	0	0	0	0	0	0	0	0	0	0	0	0	0	0	0	0	0	0	0	0	0	0	0	0	0	0	0	0	0	0	0	0	0	0	0	0	0	0	0	0	0	0	0	0	0	0	0	0	0
Thermodesulfobacterium	0	0	0	0	0	0	0	0	0	0	0	0	0	0	0	0	0	0	0	0	0	0	0	0	0	0	0	0	0	0	0	0	0	0	0	0	0	0	0	0	0	0	0	0	0	0	0	0	0
Thermodesulfobium	0	0	0	0	0	0	0	0	0	0	0	0	0	0	0	0	0	0	0	0	0	0	0	0	0	0	0	0	0	0	0	0	0	0	0	0	0	0	0	0	0	0	0	0	0	0	0	0	0
Thermodesulfovibrio	0	0	0	0	0	0	0.00306673	0	0	0	0	0	0	0	0	0	0	0.00291239	0	0	0	0	0	0	0.00378043	0	0	0.00306204	0.00289687	0	0	0	0	0	0	0.004703	0	0	0.00409702	0	0	0	0.00344531	0	0.00527037	0	0	0	0
Thermogladius	0	0	0	0	0	0	0	0	0	0	0	0	0	0	0	0	0	0	0	0	0	0	0	0	0	0	0	0	0	0	0	0	0	0	0	0	0	0	0	0	0	0	0	0	0	0	0	0	0
Thermogutta	0	0	0.00873973	0.0033036	0	0	0	0	0.00420221	0	0	0	0	0	0	0	0	0	0	0	0	0	0	0	0	0.00549209	0	0	0.00289687	0	0	0	0	0	0	0	0	0	0	0.00233514	0	0	0.00344531	0	0	0	0	0	0
Thermomicrobium	0	0	0.00873973	0.0033036	0	0	0	0.00390701	0	0	0	0	0	0	0	0	0	0	0	0	0	0	0	0	0	0	0	0	0	0	0	0.0039763	0	0	0	0	0	0	0	0	0	0	0	0	0	0	0	0	0
Thermomonospora	0	0	0.0131096	0.0033036	0	0	0	0	0.00420221	0	0.00315776	0	0.00434461	0	0	0	0	0.00291239	0.00334493	0.00419076	0	0	0.00419533	0	0	0	0	0	0	0.0051843	0	0	0	0	0	0.004703	0.00622084	0	0.0122911	0	0.00323761	0.0122022	0.00344531	0.00687498	0	0	0.00734646	0	0.0024496
Thermoplasma	0	0	0	0	0	0	0	0	0	0	0	0	0	0	0	0	0	0	0	0	0	0	0	0	0	0	0	0	0	0	0	0	0	0	0	0	0	0	0	0	0	0	0	0	0	0	0	0	0
Thermosediminibacter	0	0	0	0.0033036	0	0	0	0	0.00420221	0.00391527	0	0	0.00434461	0.00283817	0	0	0	0	0.00334493	0	0	0	0	0	0	0.00549209	0	0	0	0	0	0	0	0	0	0	0.00622084	0	0	0	0	0	0.00344531	0	0	0	0	0	0
Thermosipho	0	0	0	0	0	0	0.00306673	0	0.00420221	0.00391527	0	0	0	0	0.00405877	0	0.009996	0	0	0	0	0	0	0	0.00378043	0	0.00309885	0	0.00289687	0	0.00385193	0	0	0	0	0	0	0	0	0.00467028	0.00647522	0.00305055	0	0.00343749	0	0	0	0	0
Thermosulfidibacter	0	0	0	0	0	0	0	0	0	0	0	0	0	0	0	0.00429461	0	0	0	0	0	0	0	0	0	0	0	0	0	0	0	0	0	0	0	0	0	0	0	0	0	0	0	0	0	0	0	0	0.0024496
Thermosynechococcus	0	0.00432732	0.00436986	0.0033036	0	0	0	0	0	0	0	0	0	0	0	0	0	0	0	0.00419076	0	0.00247568	0	0	0	0	0	0	0	0.00259215	0	0	0	0.00413496	0	0	0	0	0	0.00233514	0	0	0	0	0	0	0	0	0
Thermotoga	0	0	0	0	0	0.00279861	0	0	0	0	0	0	0	0	0	0.00429461	0	0	0	0	0	0	0	0	0	0	0	0.00306204	0.00579374	0.00259215	0	0	0	0	0	0	0	0	0.00409702	0	0	0	0	0	0	0	0	0	0.0024496
Thermovibrio	0.0033583	0	0	0	0	0	0	0	0	0	0	0	0	0	0	0	0	0	0	0	0	0	0	0	0	0	0	0	0	0	0	0	0	0	0	0.004703	0	0	0	0	0	0	0	0	0	0	0	0	0
Thermovirga	0	0	0	0	0	0	0	0	0	0	0	0	0	0	0	0	0	0	0	0	0	0	0	0	0	0	0	0	0	0	0	0	0	0	0	0	0	0	0	0	0	0	0	0	0	0	0	0	0
Thermus	0.0100749	0	0.0262192	0.0132144	0.00507434	0.0139931	0.0092002	0.0156281	0.0252133	0.043068	0.0284199	0	0	0.00283817	0.0243526	0	0.019992	0.0232992	0.0167246	0.00419076	0.0116489	0	0.012586	0.0219394	0	0.0274605	0.00929656	0.00612407	0.0202781	0.0103686	0.0154077	0.0119289	0.0122692	0	0	0.018812	0.0186625	0	0.0163881	0.016346	0	0.00915164	0.0103359	0.0206249	0	0	0.00367323	0.0137931	0.0146976
Thioalkalivibrio	0.0100749	0	0.00873973	0.0099108	0	0.00839584	0.00306673	0.00390701	0	0.0156611	0.012631	0	0	0.00283817	0.0121763	0.00858922	0.009996	0.00873718	0	0	0.00582445	0.00495135	0.012586	0.00626841	0	0	0.00309885	0.00306204	0.0115875	0.00777645	0.00385193	0.0119289	0	0	0	0.004703	0.0124417	0.00476826	0.0327761	0.00934056	0	0.00305055	0	0.0103125	0	0	0.00367323	0.0172414	0.012248
Thiobacillus	0	0	0	0.0066072	0	0	0.00306673	0	0	0	0	0	0	0	0	0.00429461	0	0	0.00334493	0	0	0	0.00419533	0.00313421	0	0	0	0	0.00289687	0	0.00385193	0	0	0.00413496	0	0	0	0	0.00409702	0	0.00323761	0	0	0	0	0	0	0	0
Thiobacimonas	0	0	0.00436986	0	0	0	0	0	0	0	0	0	0	0	0	0	0.004998	0	0	0	0.00582445	0	0	0.00313421	0	0	0	0	0.00289687	0	0	0	0	0	0	0.004703	0	0	0	0.00233514	0	0	0.00344531	0	0	0	0.00367323	0	0.0024496
Thioclava	0	0	0	0	0	0.00279861	0	0	0.00420221	0	0	0	0	0	0.00405877	0	0.004998	0	0.00334493	0.00419076	0	0	0.00839067	0	0.00378043	0	0	0.00306204	0	0	0.00385193	0	0	0	0	0	0	0	0.00409702	0.00233514	0	0.00305055	0	0	0	0	0	0	0.0048992
Thiocystis	0	0	0.00436986	0	0	0	0.00306673	0	0.00420221	0	0	0	0	0	0.00405877	0.00429461	0	0	0	0	0	0	0.0167813	0.00313421	0	0.0219684	0	0.00306204	0.00579374	0	0	0	0	0	0	0	0.00622084	0.00476826	0.00409702	0.00233514	0.00323761	0.00305055	0	0	0	0	0.00367323	0.00344828	0
Thioflavicoccus	0.0033583	0	0.0131096	0.0099108	0	0.00559722	0.00306673	0	0.00840442	0	0.00315776	0	0	0	0	0.00429461	0	0.0116496	0.00334493	0.00419076	0	0.00247568	0.00419533	0.00313421	0	0	0.00309885	0	0	0.00259215	0	0.0039763	0	0	0	0	0	0	0	0.00233514	0.00323761	0.00305055	0.00344531	0	0	0	0	0.00344828	0.0048992
Thiohalobacter	0	0	0.0131096	0	0	0.00559722	0	0.00781403	0.00420221	0	0.00315776	0	0.00434461	0.00283817	0.00405877	0.00429461	0.004998	0	0.00334493	0	0	0	0.00419533	0	0	0	0	0	0.00869061	0	0.00770386	0	0	0.00413496	0	0.00940601	0.0124417	0.00476826	0	0.00233514	0	0.00305055	0.00344531	0.0103125	0.00527037	0	0.00367323	0	0.0024496
Thiolapillus	0	0	0.00436986	0.0033036	0	0	0	0	0	0.00391527	0	0.00527065	0	0.00283817	0	0	0.004998	0	0.00334493	0	0	0	0	0	0	0	0	0.00612407	0.00579374	0	0	0	0	0	0	0	0	0	0	0	0	0	0	0.00343749	0	0	0	0	0
Thiomicrospira	0	0	0	0	0	0	0.00306673	0	0.00420221	0	0	0	0	0	0	0	0.004998	0	0	0	0	0	0	0	0	0.00549209	0	0	0.00289687	0	0.00770386	0.0039763	0	0	0	0	0	0	0	0	0	0.00610109	0	0	0	0	0	0.00344828	0
Thiomonas	0.00671659	0	0.00436986	0.0033036	0.00507434	0	0.0092002	0.00781403	0.00420221	0.00783055	0.00315776	0	0.00434461	0	0.0121763	0.00429461	0.009996	0.00873718	0.0100348	0.00838153	0.0116489	0.00495135	0.012586	0.0125368	0.00378043	0.0109842	0.00309885	0	0.00579374	0.0051843	0.00770386	0.0039763	0.00613459	0	0	0	0	0.00476826	0.0122911	0.00467028	0.00971282	0.00915164	0.0172265	0	0	0	0.00734646	0.00344828	0
Thioploca	0	0	0	0.0033036	0	0	0	0	0	0	0.00315776	0	0	0	0	0	0	0	0	0	0	0	0	0	0	0	0	0	0	0	0	0	0	0	0	0	0	0	0	0	0	0	0	0	0	0	0	0	0
Tistrella	0	0	0	0	0	0.00279861	0	0	0	0	0	0	0	0	0	0	0	0	0	0.00419076	0	0	0	0.00313421	0	0	0	0	0	0	0	0.0079526	0.00613459	0	0	0	0	0	0	0.00233514	0	0	0	0	0.00527037	0	0	0.00344828	0.0024496
Tolumonas	0.0033583	0.00432732	0	0	0.0101487	0	0.00613346	0	0.00420221	0.00391527	0.00315776	0	0	0.00283817	0	0	0	0	0.0100348	0	0	0	0	0	0	0.00549209	0.00309885	0	0	0.00259215	0	0	0	0	0	0.004703	0	0.00476826	0.00409702	0	0	0.00610109	0	0.00343749	0	0	0	0.00689655	0.0024496
Treponema	0.00671659	0.012982	0.0218493	0.0231252	0.00507434	0.0195903	0.0153337	0.0312561	0.0378199	0.0508986	0.0189466	0.0210826	0.0130338	0.0085145	0.0405877	0.0171784	0.044982	0.0436859	0.0301044	0.0209538	0.0291223	0.0123784	0.0419533	0.0282079	0.0151217	0.0329525	0.0123954	0.0122481	0.0782155	0.0259215	0.0192597	0.0198815	0.00613459	0.0124049	0	0.023515	0.0311042	0.0286096	0.0286791	0.0256865	0.0356137	0.033556	0.00689061	0.0343749	0.0263518	0	0.0110197	0.0241379	0.0293952
Trichodesmium	0	0	0.00436986	0	0	0.00279861	0.00306673	0	0	0	0	0.00527065	0	0	0	0	0	0.00291239	0	0.00419076	0	0	0.00419533	0	0	0	0	0	0	0	0.00385193	0	0	0	0	0	0	0	0.00409702	0	0	0	0.00344531	0	0	0	0	0.00344828	0.0024496
Trichormus	0	0	0	0	0	0	0	0	0	0	0	0	0	0	0.00405877	0	0	0	0	0	0	0	0	0	0	0	0	0	0	0	0	0	0	0	0	0	0	0	0	0	0	0	0	0	0	0	0	0	0
Tropheryma	0	0	0	0	0	0	0	0	0	0	0	0	0	0	0	0	0	0	0	0	0	0	0	0	0	0	0	0	0	0	0	0	0	0	0	0	0	0	0	0	0	0	0	0	0	0	0	0	0
Truepera	0	0	0	0.0033036	0	0	0	0	0	0	0	0	0	0	0	0.00429461	0	0	0	0	0.00582445	0	0	0	0	0	0.00309885	0.00306204	0.00289687	0	0.00385193	0.0039763	0	0	0	0	0	0.00476826	0.00409702	0	0	0	0	0	0	0	0	0	0.0048992
Trueperella	0	0	0	0	0	0	0	0.00390701	0.0168088	0	0.00315776	0	0	0	0	0	0	0	0	0	0.0116489	0.00495135	0.00419533	0	0	0	0	0	0	0.00259215	0.00385193	0	0	0	0	0	0	0	0.00409702	0	0	0.00305055	0	0	0	0.0101153	0	0	0
Tsukamurella	0	0	0	0.0033036	0	0	0.00306673	0	0.00420221	0	0	0	0	0	0.00405877	0.00429461	0	0	0	0	0	0	0	0	0	0	0	0	0	0	0	0.0039763	0	0	0	0	0.00622084	0	0.00819404	0	0	0	0	0	0	0	0	0.00344828	0.0024496
Tumebacillus	0.0033583	0	0.00436986	0.0099108	0	0.00279861	0.0092002	0.00390701	0.0168088	0.0117458	0	0	0.00868923	0.00567634	0.00405877	0.00429461	0.009996	0.00873718	0	0	0.0116489	0.00247568	0.00419533	0.00940262	0.00756086	0.0109842	0.00619771	0.00306204	0.00869061	0.0103686	0.00770386	0.0159052	0.00613459	0.00413496	0	0.00940601	0.00622084	0.0143048	0.0163881	0.00700542	0	0.0122022	0.00344531	0	0	0	0.0146929	0.0137931	0.012248
Turicibacter	0.0167915	0	0.0218493	0.0198216	0.00507434	0.00839584	0.00613346	0.011721	0.0126066	0.0156611	0.0189466	0.00527065	0.00868923	0.0113527	0	0.0171784	0.109956	0.00873718	0.0100348	0.0167631	0.00582445	0.00990271	0.00839067	0.0125368	0.00756086	0.0164763	0.021692	0.00918611	0.0144844	0.0181451	0.0192597	0.0238578	0.0184038	0.0124049	0	0.004703	0.00622084	0.0286096	0.00819404	0.00700542	0.0291385	0.0244044	0.00344531	0.01375	0.0105407	0	0.00367323	0.00689655	0.0195968
Turneriella	0	0	0	0.0033036	0	0	0	0	0	0	0	0	0	0	0	0	0	0	0.00334493	0.00419076	0	0	0	0	0	0	0	0	0	0	0	0	0.00613459	0	0	0	0	0	0	0.00467028	0	0	0.00344531	0	0	0	0	0	0
Ureaplasma	0.0033583	0	0	0	0	0.00279861	0	0.00390701	0	0.00391527	0.00315776	0	0.00434461	0	0	0	0	0	0.00334493	0	0	0	0	0.00313421	0	0	0.00309885	0	0.00289687	0	0	0	0	0.00413496	0	0	0	0	0	0.00467028	0	0	0	0	0	0	0	0	0
V5virus	0	0	0	0	0	0	0	0	0	0	0	0	0	0	0	0	0	0	0	0	0	0	0	0	0	0	0	0	0	0	0	0	0	0	0	0	0	0	0	0	0	0	0	0	0	0	0	0	0
Vagococcus	0.0033583	0.00432732	0	0.0099108	0	0	0.00306673	0.00781403	0.00420221	0	0.00631552	0	0.00868923	0.00283817	0.00405877	0	0	0.00291239	0.00334493	0.00419076	0	0.00247568	0.00419533	0.00313421	0.00756086	0	0.00619771	0	0.00579374	0	0.00385193	0	0.00613459	0.00413496	0	0	0	0.00476826	0.0122911	0.00467028	0	0.00305055	0	0	0	0	0	0	0.0048992
Variibacter	0	0	0	0	0	0.00279861	0	0.00781403	0	0	0.00315776	0.00527065	0	0	0	0.00429461	0	0	0	0.00419076	0	0.00742703	0.00419533	0	0	0	0.00309885	0	0.00289687	0	0	0	0	0	0	0	0	0	0	0.00233514	0	0.00305055	0.00344531	0	0	0	0.00367323	0	0
Variovorax	0.00671659	0.00432732	0.0262192	0.016518	0.00507434	0.00559722	0.0214671	0.011721	0.0252133	0.00391527	0.00947328	0.00527065	0	0.00283817	0.0324702	0.0257677	0.014994	0.0116496	0.0234145	0.00838153	0.0116489	0.00247568	0.0335627	0.0219394	0	0.0439367	0.0154943	0	0.0173812	0.0051843	0.0154077	0.0079526	0	0.00413496	0	0.032921	0	0.0381461	0.0327761	0.0116757	0.0226633	0.0305055	0.0275624	0.00687498	0.0105407	0	0.0183661	0.0103448	0.0171472
Veillonella	0.332471	7.41702	0.0131096	0.370003	0.380575	0.0167917	3.38567	2.8951	0.155482	1.51521	0.0157888	1.46524	0	4.5212	0.0162351	0.0300623	0.019992	0.221342	0.0501739	5.83354	4.14701	0.797168	4.24148	0.0344763	2.49131	0.137302	1.49055	1.17276	2.03071	0.653222	2.2919	0.0079526	6.69898	5.43334	8.94829	5.53073	2.53188	7.49571	3.42511	1.67663	4.37725	0.0183033	3.75883	2.69155	6.75661	1.31499	0.0183661	0.0448276	0.0391936
Verminephrobacter	0	0	0	0	0	0.00279861	0.00306673	0	0.00420221	0.00391527	0.00315776	0	0	0	0	0	0	0	0	0	0	0	0	0.00313421	0	0.00549209	0	0.00306204	0	0.0051843	0	0.0039763	0	0	0	0	0	0	0	0	0.00323761	0	0	0.00343749	0	0	0.00367323	0	0.0024496
Verrucomicrobium	0.0033583	0	0.00436986	0.0033036	0	0.00279861	0.00306673	0.00390701	0.00420221	0.0156611	0.00315776	0	0	0	0.00405877	0.00429461	0.004998	0.00291239	0.00668986	0	0	0	0.00419533	0.00626841	0	0	0	0	0.00579374	0.0051843	0	0	0	0	0	0.004703	0	0	0.00409702	0	0	0	0.00344531	0.00343749	0	0.0101153	0.00734646	0.00344828	0.0073488
Verrucosispora	0	0	0.00436986	0.0066072	0	0.00279861	0.00306673	0	0	0.00391527	0.00315776	0	0	0	0	0	0	0.00291239	0.00334493	0	0	0	0.00419533	0.00313421	0	0	0	0	0	0	0	0.0039763	0	0	0	0.004703	0	0	0.00409702	0	0	0.00305055	0	0	0	0	0	0	0.0048992
Vibrio	0.0134332	0.012982	0.0174795	0.033036	0.0101487	0.0139931	0.0214671	0.0312561	0.0294155	0.0156611	0.012631	0.0158119	0.00434461	0.0085145	0.0121763	0.00858922	0.009996	0.0203868	0.0133797	0.0125723	0.0232978	0.0148541	0.025172	0.015671	0	0.0219684	0.0185931	0.0122481	0.0202781	0.0129608	0.0192597	0.0238578	0.0122692	0.0124049	0	0.00940601	0.00622084	0.00476826	0.0204851	0.0280217	0.00323761	0.0152527	0.0103359	0.01375	0.0158111	0.0101153	0.0110197	0.0103448	0.0146976
Virgibacillus	0.0167915	0.00432732	0.00873973	0.0066072	0.0101487	0	0.0092002	0.011721	0.00840442	0.00391527	0.012631	0.00527065	0.00434461	0	0	0.00429461	0.019992	0.00291239	0.00668986	0.00419076	0.0174734	0.00247568	0.00839067	0.00313421	0.00756086	0.0164763	0	0.00306204	0.0115875	0.00777645	0.00385193	0.0039763	0.00613459	0.00826993	0	0.00940601	0	0.00953653	0.00819404	0.00233514	0	0.00610109	0.00344531	0.00343749	0.0105407	0	0.0110197	0.00344828	0.0048992
Vitreoscilla	0.0033583	0	0	0.0033036	0	0	0	0.00781403	0.00420221	0	0	0	0	0	0	0	0	0	0	0	0.00582445	0	0	0.00313421	0	0	0	0	0	0	0	0.0039763	0	0	0	0	0	0.00476826	0	0.00233514	0	0	0	0	0	0	0	0	0.0024496
Vogesella	0	0	0	0	0	0	0.00306673	0	0	0	0.00315776	0.00527065	0.00434461	0	0.00405877	0.0128838	0	0.00291239	0.00334493	0	0.00582445	0	0.00419533	0.00313421	0	0	0	0.00306204	0.00289687	0.0051843	0	0	0	0	0	0.00940601	0	0.00476826	0.00819404	0	0	0.00305055	0.00689061	0	0.00527037	0	0	0.00689655	0.0024496
Vulgatibacter	0	0	0	0.0033036	0	0.00279861	0	0	0	0	0.00315776	0	0	0.00283817	0.00405877	0	0.004998	0	0	0	0	0	0	0.00313421	0	0.00549209	0.00619771	0	0.0115875	0	0	0	0	0	0	0	0	0.00476826	0.00819404	0.00233514	0	0	0.00344531	0	0.00527037	0	0.00367323	0	0.0073488
Waddlia	0	0	0	0	0	0	0	0	0	0	0	0	0	0	0	0	0	0	0	0	0	0	0	0	0	0	0	0	0	0	0	0	0	0	0	0	0	0	0	0	0	0	0	0	0	0	0	0	0
Weeksella	0	0	0	0	0	0	0	0	0.00420221	0	0	0	0	0	0	0	0	0	0	0	0	0	0.00419533	0	0	0	0.00309885	0	0	0	0	0	0	0	0	0	0	0	0	0	0	0.00305055	0	0	0	0	0	0	0
Weissella	0.0033583	0	0.00436986	0	0	0	0	0	0.00420221	0.00391527	0.00631552	0.00527065	0	0	0	0	0	0	0.180626	0	0.00582445	0	0.00419533	0	0	0	0	0.0275583	0.00289687	0.0051843	0.00385193	0.0039763	0	0.00413496	0	0	0	0.00953653	0	0.00233514	0	0.00305055	0.00344531	0	0.00527037	0	0	0	0.0195968
Wenyingzhuangia	0	0.00432732	0	0	0	0.00279861	0	0	0	0	0.00315776	0	0	0	0	0	0.004998	0	0	0	0	0	0	0	0	0	0	0	0	0	0	0	0	0	0	0	0	0	0	0.00233514	0	0	0	0	0.00527037	0	0	0	0
Wenzhouxiangella	0	0	0.00436986	0.0033036	0	0	0	0	0.00840442	0.00391527	0	0	0	0	0	0	0	0	0.00668986	0	0	0	0.00419533	0.00313421	0	0.00549209	0.00309885	0	0	0	0	0	0	0	0	0	0	0	0.00409702	0.00233514	0	0.00305055	0	0	0	0	0	0	0
Wigglesworthia	0	0	0	0	0	0	0	0	0	0	0	0	0	0	0	0	0	0	0	0	0	0	0	0	0	0	0	0	0	0	0	0	0	0	0	0	0	0	0	0	0	0	0	0	0	0	0	0	0
Winogradskyella	0.0033583	0	0	0.0033036	0	0.00279861	0	0	0.00420221	0	0	0	0.00434461	0	0	0	0	0	0	0.00419076	0	0	0	0	0	0	0.00309885	0	0.00289687	0.00259215	0.00385193	0	0	0	0	0	0	0	0.00409702	0.00233514	0	0.00305055	0	0	0.00527037	0	0	0	0.0024496
Woeseia	0	0	0	0.0033036	0	0	0	0	0	0.00391527	0	0	0	0.00283817	0	0	0	0.00291239	0	0	0	0	0	0	0.00378043	0	0.00309885	0	0	0.00259215	0	0	0	0	0	0	0	0.00476826	0	0	0	0	0	0.00343749	0.00527037	0	0	0	0
Wolbachia	0	0	0	0	0	0	0	0	0	0	0	0	0	0	0	0	0	0	0	0	0	0	0	0	0	0	0	0	0	0	0	0	0	0	0	0	0	0	0	0	0	0	0	0	0	0	0	0	0
Wolinella	0	0	0	0	0	0.00279861	0	0	0	0	0	0	0	0	0	0	0	0	0	0	0	0	0	0.00313421	0	0	0	0	0	0	0	0.0039763	0	0	0	0	0	0	0	0	0	0	0	0	0	0	0	0.00344828	0
Xanthobacter	0	0	0	0	0.00507434	0.00279861	0.0092002	0.00390701	0.00420221	0.00391527	0	0	0	0.00283817	0	0	0	0.00291239	0	0.00419076	0	0.00247568	0	0	0	0	0	0	0.00869061	0.00777645	0	0	0	0	0	0	0	0	0	0	0	0.00305055	0	0	0	0	0.00734646	0	0.0024496
Xanthomonas	0.00671659	0.00432732	0.0218493	0.0198216	0	0.00839584	0	0.00781403	0.0126066	0.0313222	0.012631	0.0158119	0.00868923	0.00567634	0.00405877	0	0.014994	0.014562	0.00668986	0.00838153	0.00582445	0.00247568	0.0335627	0.0188052	0	0.0329525	0.00619771	0.00306204	0.0202781	0.00777645	0.0231116	0.0079526	0	0.00413496	0.0581058	0.00940601	0.00622084	0.0143048	0.0327761	0.0116757	0.016188	0.0183033	0.0172265	0.00343749	0	0.0101153	0.0110197	0	0.0146976
Xenorhabdus	0	0.00865464	0	0	0	0.00279861	0	0	0	0	0	0.00527065	0	0	0.00405877	0	0	0.00291239	0	0.0125723	0	0.00742703	0.00419533	0	0.00378043	0.00549209	0	0	0.00289687	0.00259215	0	0	0	0.00413496	0	0	0.00622084	0	0	0.00467028	0.00647522	0	0	0	0.00527037	0	0	0	0
Xuhuaishuia	0	0	0.00436986	0.0033036	0	0	0	0	0	0	0	0	0	0	0.00405877	0	0	0	0	0	0	0	0.00419533	0.00626841	0	0	0.00309885	0	0	0	0	0	0	0	0	0	0.00622084	0	0.00409702	0.00233514	0.00323761	0.00305055	0.00344531	0	0	0	0.00367323	0	0
Xylanimonas	0	0	0	0.0066072	0.00507434	0	0.00306673	0.00390701	0	0.00783055	0	0.00527065	0	0.00283817	0	0	0	0.00291239	0.0100348	0	0.00582445	0	0	0.00626841	0	0.0109842	0.00309885	0.00612407	0.00579374	0.00259215	0	0	0.00613459	0.00413496	0	0.00940601	0	0.00953653	0.0245821	0.00233514	0.00323761	0.00305055	0	0	0.00527037	0	0.00367323	0	0.0097984
Xylella	0	0	0.00436986	0	0	0.00279861	0	0	0	0	0	0	0	0	0	0.00429461	0	0	0	0	0	0	0	0	0	0	0	0	0	0	0	0	0	0.00413496	0	0.028218	0	0.00476826	0.00819404	0.00233514	0	0.00305055	0.00344531	0	0	0	0	0	0
Yangia	0.0033583	0	0.00873973	0	0	0	0	0	0	0	0	0	0	0	0	0	0	0.00291239	0	0	0	0	0	0	0	0	0.00309885	0	0.00289687	0	0	0.0079526	0	0.00413496	0	0	0	0	0.00819404	0.00233514	0	0	0.00344531	0	0.00527037	0	0	0	0.0024496
Yersinia	0.0167915	0.00865464	0.00436986	0	0	0.00839584	0.0153337	0.00390701	0.0126066	0	0.00315776	0	0.00868923	0.00283817	0.0121763	0.00858922	0.014994	0.00873718	0.0100348	0	0.00582445	0	0.00419533	0.0250737	0.00378043	0.0109842	0.0185931	0.00306204	0.00579374	0.0103686	0.00770386	0	0	0.0248098	0.0581058	0.00940601	0.0746501	0	0	0.00934056	0.0129504	0.00610109	0	0.0274999	0.00527037	0	0.00734646	0.0103448	0.0073488
Zhongshania	0	0	0	0	0	0	0	0	0	0	0	0	0	0	0	0	0	0	0	0	0	0	0	0	0	0	0	0	0	0	0	0	0	0	0	0	0	0	0.00409702	0	0	0	0	0	0	0	0	0.00344828	0
Zobellella	0.0100749	0	0.00873973	0.0099108	0.0101487	0.00279861	0.0153337	0.0156281	0.00840442	0.00783055	0.00631552	0	0	0.0113527	0	0.00858922	0.014994	0.014562	0.0133797	0.00419076	0.00582445	0.00247568	0.0167813	0.0125368	0.00756086	0.0109842	0.0123954	0.00918611	0.00579374	0.0051843	0.0192597	0.0198815	0	0.00413496	0	0.014109	0.00622084	0.0143048	0.00409702	0.0116757	0.00647522	0.0122022	0.0103359	0	0.0210815	0	0.0110197	0.00344828	0.0097984
Zobellia	0	0	0	0.0033036	0	0	0	0	0	0	0	0	0	0	0.00405877	0	0	0	0	0	0	0	0	0	0	0	0	0	0	0	0	0	0	0	0	0	0	0	0	0	0	0	0	0	0	0	0	0	0
Zunongwangia	0	0	0.0131096	0	0	0	0	0	0.00420221	0	0	0	0	0	0	0	0	0	0	0	0	0	0	0	0	0	0	0	0	0.00259215	0	0	0.00613459	0	0	0	0	0	0	0	0	0	0	0	0	0	0	0	0
Zymomonas	0	0	0.00436986	0.0033036	0	0	0	0	0	0	0	0	0	0.00283817	0	0	0.004998	0	0	0	0.0174734	0	0	0.00313421	0.00378043	0.00549209	0	0	0	0.00259215	0	0.0039763	0	0	0	0	0.00622084	0	0.00409702	0	0	0.00305055	0.00344531	0	0.00527037	0	0	0	0
[truncated: 532 more columns]
